# Supplementary material for: A mathematical model of cell-free DNA fragment size reveals cancer-specific fragmentomic patterns
Source: Research Square preprint supplement (doi:10.21203/rs.3.rs-7677707/v1), 2025-10-06
Supplement: Supplementary file 2 [file ad70710276785073b85d6844.xlsx]

## Sheet: Supplementary Data 1
Supplementary Data 1. Size profiles and deconvolution results of cell-free DNA from different bodily fluids*
Number of fragments						Size deconvolution results
Sample Size (bp)	Plasma	Cerebrospinal fluid (CSF)	Saliva	Urine			Center (bp)	Scale (bp)	Amplitude (%)
30	7228	80	206	163087		Saliva	38.41	2.09	5.10889
31	8855	120	28653	169983			48.77	2.24	9.55778
32	11071	132	32778	179788			58.64	2.36	11.0366
33	13462	140	40097	198864			69.05	1.98	9.34222
34	16901	165	52570	212517			79.46	2.19	7.62009
35	20748	223	73507	236669			90.39	2.42	5.05233
36	25127	290	111977	269308			100.55	3.22	5.17032
37	30724	394	170852	326298			110.9	3.03	4.36486
38	37327	623	216286	403101			121.66	3.47	4.64446
39	43799	834	217459	488525			132.55	3.41	4.08175
40	48350	1080	167050	442315			142.23	4.89	6.32075
41	53605	1230	122665	388379			151.87	4.29	4.18836
42	59814	1473	98480	382962			159.91	4.9	4.17712
43	66327	1874	99768	384342			167.38	6.79	7.81336
44	75686	2266	111976	405486			177.69	7.41	5.99916
45	85680	2808	135744	440996			188.84	7.55	3.91183
46	96902	3702	176103	484177			199.8	7.35	2.50252
47	109962	4869	254008	552090			210.71	7.61	1.95353
48	128373	6885	354009	669227			222.83	7.91	2.19189
49	149692	9458	389333	815001		CSF	60.71	1.57	0.0913893
50	169684	11119	324242	874171			70.75	4.48	0.641891
51	182607	11454	230673	715507			80.4	2.28	0.672806
52	195958	11490	166222	654813			91.32	2.6	1.59073
53	214144	12191	148681	646848			101.61	3.78	2.76829
54	233175	13027	151885	644677			111.39	3.67	3.52
55	250765	14430	176387	672662			122.12	3.79	6.21268
56	270966	16569	225746	740814			133.08	3.31	7.7798
57	290511	19887	309711	807510			142.68	5.89	18.3546
58	312157	25299	406308	926233			152.19	5.55	14.096
59	331581	31541	421024	1054627			159.2	2.99	3.30506
60	342035	36246	344830	1128304			166	5.72	22.1451
61	338683	36904	236372	1058130			175.91	7.19	15.0256
62	329906	35726	173408	959095			187.87	7.03	4.5612
63	324305	35887	149065	931808			199.79	6.76	1.84725
64	324552	37875	141419	939249			210.81	5.92	0.871838
65	325041	38198	149939	948461			221.36	5.64	0.561773
66	324644	39414	176031	999553			233.55	8	1.49589
67	330994	42207	241484	1076989		Urine	29.62	3.14	0.414218
68	345172	49045	357424	1225977			39.26	3.59	2.35668
69	366111	58294	431845	1468475			49.48	3.07	3.75337
70	380061	65622	375273	1700687			59.83	4.53	7.65783
71	368245	62441	248791	1510809			70.13	3.73	9.5573
72	359400	59417	158580	1250359			80.31	2.87	10.1111
73	360872	58745	122979	1152781			90.66	3.46	9.67897
74	366369	59874	115255	1117672			100.76	4.41	10.5402
75	374695	62528	118595	1127925			111.09	4.18	9.10543
76	382218	64792	134128	1175782			121.21	4.77	7.51558
77	393733	68045	175556	1241878			131.33	5.64	6.25158
78	420407	77040	251508	1389733			141.35	6.09	5.87491
79	466707	94078	311598	1718608			150.88	6.5	4.25043
80	504568	113894	308166	2152165			159.87	6.5	3.51127
81	502862	116528	246017	2078251			169.4	6.5	3.04707
82	454033	96396	161338	1588573			179.44	6.5	2.51652
83	410866	80090	108937	1284525			189.76	6.5	2.02371
84	398492	77676	94273	1179124			200.34	6.5	1.67199
85	398133	80663	89344	1142424			211.03	6.17	1.27376
86	407159	89403	93774	1158994			221.4	6.14	1.03359
87	414307	97411	104588	1189271			231.78	6.5	0.959891
88	436998	111946	131843	1271207			243.01	6.5	1.01983
89	489601	138104	175494	1436667		Plasma	59.2	7	0.897856
90	558720	177924	207262	1707586			70.56	6.1	0.646028
91	593785	209352	199355	1868292			80.41	4.01	0.682231
92	582563	210866	168267	1647154			91.02	3.25	0.689153
93	516547	179995	126974	1352779			101.36	3.65	0.714261
94	461616	155071	98717	1215382			111.43	3.34	0.951991
95	435763	146394	88347	1168778			122.03	2.21	1.30728
96	434049	147141	91947	1174300			133.26	1.84	1.77064
97	444162	155818	104258	1205920			142.58	4.41	7.51767
98	473796	174854	123244	1291316			152.03	4.28	7.70604
99	525564	202560	146793	1407993			159.07	2.66	3.67223
100	581337	234348	164465	1539725			166.4	5.7	40.1043
101	617353	261670	166127	1569386			176.05	6.66	26.7706
102	614477	269147	147134	1508112			187.59	6.47	7.64053
103	593150	261183	124259	1335777			199.1	6.12	2.46229
104	565119	240158	104990	1217955			209.32	4.62	0.597902
105	539693	226445	92620	1147322			217.12	2.94	0.0862782
106	537717	227815	90429	1151392
107	554167	236655	96000	1166103
108	590155	255855	108192	1217888
109	661455	285231	125876	1289929
110	766339	330014	148150	1412761
111	855217	369582	159369	1524051
112	856197	371926	149003	1479200
113	768366	337701	119802	1295720
114	696382	307487	96959	1154304
115	686123	303796	89163	1077027
116	703979	315672	88198	1051001
117	729229	334739	92053	1040461
118	775682	354447	99365	1052367
119	873517	389631	110766	1066295
120	1057891	448036	125189	1130073
121	1311786	529395	141512	1194283
122	1499034	592748	150983	1189718
123	1441072	584637	143113	1088173
124	1179053	503529	116385	985282
125	970740	449647	95339	922950
126	916716	445980	87077	898945
127	956666	470472	89226	888951
128	1026592	502121	96845	886230
129	1136584	540070	106141	891343
130	1337818	601295	116043	908625
131	1665840	687161	128017	932101
132	2135668	806623	141855	933781
133	2594861	916320	152906	900998
134	2684679	928827	148843	849074
135	2367796	851925	129029	810915
136	2054484	773832	111837	786819
137	2044425	759798	108019	784775
138	2310344	794955	116046	791077
139	2789262	858889	129985	803655
140	3392452	940475	144363	816401
141	3885731	1012196	154082	827483
142	4073306	1042301	152969	816642
143	4063999	1046450	148136	788681
144	4081447	1052173	145585	752759
145	4113126	1046095	142978	720058
146	4045198	1010655	135266	696631
147	3997389	977800	126490	687293
148	4129319	975358	125862	679848
149	4399140	990207	132212	676432
150	4796438	1013938	140679	667701
151	5301743	1047716	149352	659344
152	5737068	1076320	155920	643051
153	5814059	1060549	152930	628910
154	5672653	1015494	145067	612395
155	5708598	983088	139319	597729
156	6060736	976942	139794	587260
157	6669307	989729	144546	579817
158	7402662	1020732	148501	571518
159	8166931	1059259	155433	567075
160	8779750	1082194	160301	557113
161	9221054	1090490	160604	544705
162	9730664	1098498	159839	532533
163	10658800	1140765	158261	514657
164	12048447	1224916	159087	500262
165	13320325	1292592	160725	488570
166	13830036	1302691	161476	482091
167	13768807	1261133	161226	478961
168	13413806	1202357	159297	477246
169	12868482	1140714	154727	471909
170	12162142	1070794	149490	463321
171	11427143	1004326	143931	450866
172	10839395	947831	139651	434215
173	10527773	912686	135108	420647
174	10374707	893517	131790	407670
175	10244239	876057	130279	400930
176	9970086	848536	129450	392786
177	9464878	805041	128657	391373
178	8800119	752589	125979	388505
179	8062041	694012	122023	387588
180	7339050	638373	116535	381057
181	6680281	589342	111304	371667
182	6119711	544355	106983	356392
183	5664554	509168	102898	342840
184	5307367	480083	99552	331830
185	5039497	457111	97182	323283
186	4805044	436418	95311	318511
187	4580334	417863	93710	315762
188	4326290	398980	92468	316635
189	4032168	375321	91062	315834
190	3715150	350921	88258	311386
191	3396338	327628	84343	303163
192	3101470	303405	81288	294631
193	2843244	281542	77941	280579
194	2629219	263786	74967	269808
195	2459462	248261	72668	261900
196	2320710	236787	70939	257002
197	2205928	227444	69138	256437
198	2098251	219436	69007	257325
199	1987319	211539	68070	257866
200	1872614	203904	66028	255937
201	1742110	192678	63946	251120
202	1613391	182343	61737	244065
203	1487298	170974	60005	233309
204	1373063	160851	57387	223755
205	1278360	152838	55493	215977
206	1198817	145284	53855	209248
207	1129235	139449	52600	207677
208	1066158	136128	52044	208393
209	1010411	132226	51868	210512
210	952912	129061	50675	211035
211	892124	125448	49699	210308
212	829652	119580	48688	205047
213	768066	114530	46463	197342
214	710294	107372	45574	189320
215	657803	102972	43632	181197
216	614838	98665	42304	175556
217	576936	96149	41684	171921
218	543066	93305	41743	172198
219	513552	92631	40784	173953
220	485041	92180	41035	175109
221	455182	91607	39983	174490
222	426555	89569	39569	171965
223	397063	86071	38237	166872
224	369497	83787	37378	160029
225	344698	81774	36064	154017
226	322258	79709	35409	148445
227	303318	78268	34625	145997
228	287537	78094	34630	144209
229	272064	78334	34412	146011
230	258497	79500	34437	146937
231	244475	79606	34211	147085
232	233353	79395	33827	145232
233	220229	78335	33217	140393
234	209330	76448	32618	136072
235	197714	75164	31346	130746
236	188930	74263	31485	126283
237	180261	73963	30958	123114
238	173429	74435	30872	121912
239	168028	74354	30765	122502
240	163124	74548	30201	123482
241	159325	75254	30537	123677
242	154115	76027	30269	122717
243	148818	75475	29996	119848
244	144656	74531	29055	116458
245	141494	72672	29061	111872
246	137843	72094	28656	107488
247	134600	71671	28237	104435
248	132700	70879	28247	102284
249	130309	70522	28089	102329
250	129054	70422	28411	103296

## Sheet: Supplementary Data 2
Supplementary Data 2. Size profiles and deconvolution results of cell-free DNA from xenograft model*
Number of fragments			Size deconvolution results
Sample Size (bp)	Human		Center (bp)	Scale (bp)	Amplitude (%)
30	12		50.06	1.27	0.174195
31	24		59.76	3.08	1.21499
32	23		70.07	3.2	2.67566
33	23		80.05	2.42	3.73947
34	21		90.83	2.48	6.1797
35	40		101.01	3.32	7.00649
36	52		110.98	3.29	7.33449
37	83		121.61	2.87	12.6711
38	91		132.4	3.81	21.8767
39	141		142.09	5.74	18.6488
40	129		151.21	5.74	9.13541
41	128		159.61	2.64	1.27488
42	152		167.23	7	7.06445
43	171		178.58	5.89	2.349
44	219		189.19	5.89	1.15632
45	287		199.89	5.89	0.683788
46	344		210.99	5.89	0.561368
47	455
48	742
49	971
50	1081
51	906
52	911
53	889
54	930
55	1053
56	1251
57	1498
58	1839
59	2393
60	2421
61	2187
62	1974
63	1987
64	2150
65	2128
66	2323
67	2707
68	3277
69	4342
70	4596
71	3778
72	3646
73	3626
74	3488
75	3565
76	3696
77	4013
78	4979
79	6732
80	8113
81	7552
82	5245
83	4250
84	4140
85	4284
86	4692
87	5242
88	6082
89	8371
90	11363
91	12559
92	10642
93	7964
94	6982
95	6458
96	6299
97	6585
98	7311
99	8689
100	10687
101	11655
102	10857
103	9369
104	8098
105	7677
106	7648
107	8056
108	8699
109	9876
110	12054
111	13611
112	12497
113	10034
114	9117
115	9589
116	10172
117	10848
118	12008
119	13928
120	17952
121	22361
122	24036
123	20534
124	16036
125	14416
126	15084
127	16228
128	17249
129	18710
130	21447
131	25814
132	29209
133	30360
134	27097
135	22696
136	20142
137	19315
138	19098
139	18498
140	19235
141	19118
142	19442
143	18867
144	18030
145	16622
146	15323
147	14583
148	14028
149	13362
150	13026
151	12643
152	12225
153	11321
154	10152
155	9071
156	8588
157	8441
158	8143
159	8220
160	7970
161	7482
162	7170
163	6845
164	6713
165	6769
166	6782
167	6605
168	6470
169	6038
170	5737
171	5434
172	5112
173	4850
174	4631
175	4486
176	4301
177	4131
178	3886
179	3726
180	3569
181	3353
182	3226
183	2981
184	2741
185	2648
186	2448
187	2475
188	2372
189	2237
190	2134
191	1989
192	1900
193	1786
194	1725
195	1737
196	1548
197	1545
198	1415
199	1449
200	1381
201	1351
202	1239
203	1232
204	1197
205	1098
206	1064
207	1046
208	1012
209	970
210	960
211	943
212	914
213	943
214	771
215	782
216	752
217	724
218	706
219	703
220	724
221	638
222	618
223	629
224	576
225	569
226	551
227	534
228	534
229	489
230	525
231	453
232	431
233	448
234	414
235	430
236	410
237	358
238	380
239	350
240	330
241	340
242	303
243	327
244	297
245	276
246	282
247	244
248	279
249	239
250	255

## Sheet: Supplementary Data 3
Supplementary Data 3. Size profiles and deconvolution results of cell-free DNA from individuals with germline TP53 mutation*
Number of fragments					Size deconvolution results
Sample Size (bp)	Healthy	LFS cancer negative	LFS cancer positive			Center (bp)	Scale (bp)	Amplitude (%)
30	2225	76402	7822		Healthy	81.28	2.57	0.267572
31	2310	32970	4621			91.99	2.51	0.404612
32	2511	54667	6619			102.16	3.4	0.557466
33	3008	33816	5456			111.88	3.29	0.691085
34	3675	45352	8199			122.71	2.07	0.752484
35	4524	35824	7665			134.11	1.7	0.855887
36	5992	44945	9944			143.45	4.74	5.91368
37	7163	40363	9579			152.62	5.34	8.13808
38	9131	53506	12036			159.97	2.89	2.56603
39	11536	56661	13588			167.54	6.47	41.5365
40	14305	70101	17527			177.12	7.17	30.387
41	16361	89004	20697			188.5	7.08	9.93671
42	18963	94244	23052			199.98	6.07	2.61998
43	22158	106489	26024			209.99	4.67	0.645488
44	26041	119644	29347		LFS cancer negative	81.28	2.39	0.28424
45	30729	130156	33822			92.09	2.24	0.385583
46	36847	150719	38895			102.25	3.34	0.589704
47	44416	164935	45349			112.01	3.37	0.759356
48	54851	196783	57336			122.74	2.18	0.903707
49	66855	237216	72244			134.09	1.83	1.08653
50	77767	279818	84734			143.5	4.97	7.19586
51	83741	305386	95822			152.69	5.31	8.41888
52	85738	315227	95912			159.97	2.82	2.38511
53	88570	320554	99172			167.43	6.61	42.2199
54	93462	343702	104556			177.02	7.45	29.1857
55	101206	358669	108885			188.75	7.27	8.71007
56	111536	406671	121464			200.37	6.17	2.41263
57	134110	445634	134706			210.57	5.28	0.750263
58	155240	509500	155746		LFS cancer positive	81.31	2.58	0.378731
59	190301	593652	188343			92.13	2.4	0.514943
60	225875	678114	218382			102.34	3.59	0.806754
61	235060	727734	232681			112.07	3.7	1.02935
62	222219	719075	229106			122.79	2.51	1.20586
63	220795	711740	223463			134.06	2.14	1.51868
64	222883	723002	226558			143.45	5.37	8.55852
65	226995	735873	229768			152.69	5.64	9.55268
66	236698	773195	235512			159.91	2.82	2.39704
67	251631	840078	294825			167.36	6.54	40.7637
68	278445	889199	290508			176.93	7.4	27.5386
69	321683	1025652	335817			188.65	7.2	8.00138
70	360743	1158410	390838			200.3	6.16	2.23469
71	370854	1234210	442927			210.49	5.38	0.695111
72	360718	1182084	400763
73	350263	1160450	391381
74	354866	1183830	403923
75	372492	1235872	406499
76	391844	1266510	415783
77	416397	1335473	428588
78	461772	1474806	478910
79	551941	1775207	571454
80	671269	2183371	717610
81	757523	2484429	821451
82	734316	2466596	822683
83	656027	2129916	704247
84	607805	1927021	632091
85	589770	1825778	613679
86	585262	1760149	586156
87	604512	1767980	585614
88	626627	1876381	615374
89	713848	2186422	726021
90	864816	2669578	888465
91	1018419	3222178	1086640
92	1105066	3545447	1194277
93	1062476	3436600	1156872
94	945983	3035342	1030935
95	850012	2678838	909465
96	804562	2521579	862047
97	817380	2539872	864801
98	864460	2699380	911440
99	964490	3041026	1010713
100	1095500	3541326	1184653
101	1210646	3929676	1314536
102	1273808	4130999	1392309
103	1273634	4133548	1395623
104	1227887	4055106	1391170
105	1163057	3819802	1301854
106	1125259	3680765	1248446
107	1141816	3698561	1248016
108	1195879	3881984	1315876
109	1299674	4186660	1402097
110	1450221	4697861	1563500
111	1613964	5263840	1747141
112	1697705	5594258	1856777
113	1640219	5429229	1806677
114	1503920	5004163	1669399
115	1409354	4735065	1586399
116	1387121	4668009	1564794
117	1416572	4777560	1603723
118	1480493	5001809	1680094
119	1597815	5372244	1779769
120	1802086	6071186	1994033
121	2123495	7227598	2365224
122	2495838	8496780	2758050
123	2684370	9163709	2972583
124	2541983	8677614	2832205
125	2208017	7549360	2500001
126	1965931	6756099	2270004
127	1902542	6568704	2231643
128	1923353	6695526	2287077
129	2033091	7092981	2436651
130	2249111	7856423	2680068
131	2650880	9237656	3125683
132	3256306	11358021	3804934
133	4015603	13975665	4608860
134	4597744	15991536	5228506
135	4664768	16233555	5307235
136	4469712	15523699	5106988
137	4330715	15008791	4948799
138	4566967	15741101	5153255
139	5204553	17816397	5733134
140	6101290	20819109	6583610
141	7146398	24265183	7538486
142	7958419	26934874	8292229
143	8380235	28278470	8664355
144	8614414	29033218	8884993
145	8860044	29802358	9122591
146	9040025	30314754	9271954
147	9169563	30508104	9308312
148	9418163	31084313	9464163
149	9855042	32246317	9773812
150	10406958	33874817	10199339
151	11155800	36116490	10769050
152	11970266	38653518	11405571
153	12619743	40654035	11915200
154	12875708	41309971	12059015
155	12881458	41239832	12022282
156	13306270	42388067	12318549
157	14132001	44724351	12949871
158	15328044	48328685	13904964
159	16802920	52749647	15060793
160	18351176	57514776	16313112
161	19661833	61558217	17363073
162	21001000	65643289	18431320
163	22454309	70088342	19613394
164	24636535	76674253	21412714
165	27277259	84374677	23517628
166	29524321	90762744	25244192
167	30764369	94044898	26066256
168	31237062	95077702	26252852
169	31157471	94456613	25966716
170	30453329	92054473	25225354
171	29379988	88572339	24199403
172	28216167	84779651	23096403
173	27351523	81796800	22235741
174	26755336	79575157	21605346
175	26491905	78178447	21212360
176	26025935	76307100	20645318
177	25344018	73811481	19935853
178	24222613	70234471	18922199
179	22799005	65982893	17726407
180	21201095	61330772	16440053
181	19625555	56722277	15165519
182	18115601	52339966	13974549
183	16745876	48339676	12890974
184	15620509	44964743	11987001
185	14699076	42207872	11243080
186	13940312	39850333	10617895
187	13297301	37941451	10108538
188	12637201	35997989	9587028
189	11941177	34082103	9059975
190	11181696	32006860	8488340
191	10329629	29695134	7858089
192	9516756	27484870	7253925
193	8742424	25316212	6687464
194	8043436	23328025	6176213
195	7454420	21658277	5717752
196	6972496	20206792	5341841
197	6547358	19057820	5042377
198	6182699	18065954	4773970
199	5859417	17142372	4541472
200	5516662	16251458	4304992
201	5164081	15284471	4051815
202	4827638	14328146	3798025
203	4459636	13316472	3526955
204	4146969	12396957	3272551
205	3825698	11496622	3035856
206	3546055	10715069	2836370
207	3306796	10023229	2650555
208	3118792	9470948	2512120
209	2923900	8911077	2366360
210	2741124	8393979	2228279
211	2581120	7928698	2094031
212	2406739	7414111	1966480
213	2240585	6932461	1837932
214	2069565	6433518	1701947
215	1914092	5963328	1581893
216	1769695	5537836	1469162
217	1645390	5193065	1389472
218	1531872	4837132	1289384
219	1439238	4555386	1217423
220	1352365	4268997	1140527
221	1271686	4067787	1096735
222	1195717	3803379	1017746
223	1114424	3573248	960062
224	1043344	3333378	890060
225	964477	3088867	829341
226	895570	2877270	776134
227	835573	2700385	728631
228	785548	2538501	687747
229	744278	2415099	661534
230	701906	2269698	619648
231	665486	2153261	590691
232	631129	2050593	563108
233	592112	1931746	533077
234	560965	1847856	513033
235	527166	1736971	485380
236	499026	1650873	468731
237	472309	1550153	433769
238	452258	1475837	415963
239	434068	1423246	401438
240	418613	1381435	394188
241	403593	1337855	383088
242	393065	1303764	374673
243	378774	1253306	361073
244	368649	1234573	359756
245	352193	1173531	341556
246	341575	1140450	333789
247	332267	1114550	325974
248	323568	1086672	317433
249	317794	1069336	313221
250	312060	1046766	308456

## Sheet: Supplementary Data 4
Supplementary Data 4. Copy number aberrations in a breast cancer patient (SLX-22368.SXTHSA03)*
chr	start	end	copy.number	event	logR	subclone.status	Corrected_Copy_Number	Corrected_Call	logR_Copy_Number
1	1000001	2000000	3	GAIN	NA	1	3	GAIN	NA
1	4000001	5000000	3	GAIN	-0.0595	1	3	GAIN	2.91269
1	5000001	6000000	3	GAIN	-0.076	1	3	GAIN	2.85588
1	6000001	7000000	3	GAIN	-0.1682	1	3	GAIN	2.55014
1	7000001	8000000	3	GAIN	-0.0157	1	3	GAIN	3.06667
1	8000001	9000000	3	GAIN	0.044	1	3	GAIN	3.28423
1	9000001	10000000	3	GAIN	-0.0871	1	3	GAIN	2.81803
1	10000001	11000000	3	GAIN	0.0412	1	3	GAIN	3.27382
1	11000001	12000000	3	GAIN	-0.0962	1	3	GAIN	2.78722
1	14000001	15000000	3	GAIN	-0.0385	1	3	GAIN	2.98593
1	15000001	16000000	3	GAIN	0.0049	1	3	GAIN	3.14073
1	18000001	19000000	3	GAIN	-0.1385	1	3	GAIN	2.64651
1	19000001	20000000	3	GAIN	0.0108	1	3	GAIN	3.16213
1	20000001	21000000	3	GAIN	-0.1071	1	3	GAIN	2.75056
1	21000001	22000000	3	GAIN	0.0449	1	3	GAIN	3.28758
1	22000001	23000000	3	GAIN	-0.0642	1	3	GAIN	2.89644
1	23000001	24000000	3	GAIN	-0.0699	1	3	GAIN	2.87681
1	24000001	25000000	3	GAIN	0.0418	1	3	GAIN	3.27605
1	25000001	26000000	3	GAIN	-0.367	1	3	GAIN	1.95379
1	26000001	27000000	3	GAIN	-0.3053	1	3	GAIN	2.13016
1	27000001	28000000	3	GAIN	-0.2292	1	3	GAIN	2.35834
1	28000001	29000000	3	GAIN	-0.1091	1	3	GAIN	2.74387
1	30000001	31000000	3	GAIN	NA	1	3	GAIN	NA
1	31000001	32000000	3	GAIN	0.2833	1	3	GAIN	4.25252
1	32000001	33000000	3	GAIN	0.2908	1	3	GAIN	4.28554
1	33000001	34000000	3	GAIN	0.0388	1	3	GAIN	3.26492
1	34000001	35000000	3	GAIN	-0.0662	1	3	GAIN	2.88954
1	35000001	36000000	3	GAIN	-0.036	1	3	GAIN	2.99473
1	36000001	37000000	3	GAIN	0.1915	1	3	GAIN	3.86197
1	37000001	38000000	3	GAIN	-0.1119	1	3	GAIN	2.73451
1	38000001	39000000	3	GAIN	-0.0175	1	3	GAIN	3.06025
1	39000001	40000000	3	GAIN	-0.0311	1	3	GAIN	3.012
1	40000001	41000000	5	HLAMP	0.9453	0	8	HLAMP	7.76514
1	41000001	42000000	5	HLAMP	0.8468	0	7	HLAMP	7.12321
1	42000001	43000000	5	HLAMP	0.8745	0	7	HLAMP	7.29933
1	43000001	44000000	5	HLAMP	0.9195	0	8	HLAMP	7.59274
1	44000001	45000000	5	HLAMP	0.7965	0	7	HLAMP	6.81193
1	45000001	46000000	5	HLAMP	0.4535	0	5	HLAMP	4.95545
1	46000001	47000000	5	HLAMP	0.5447	0	5	HLAMP	5.40683
1	47000001	48000000	5	HLAMP	0.472	0	5	HLAMP	5.04472
1	48000001	49000000	5	HLAMP	0.4009	0	5	HLAMP	4.7078
1	49000001	50000000	5	HLAMP	0.3991	0	5	HLAMP	4.69949
1	50000001	51000000	5	HLAMP	0.4609	0	5	HLAMP	4.99102
1	51000001	52000000	5	HLAMP	0.259	0	4	AMP	4.08305
1	52000001	53000000	3	GAIN	-0.0149	0	3	GAIN	3.03781
1	53000001	54000000	3	GAIN	0.011	0	3	GAIN	3.12837
1	54000001	55000000	3	GAIN	0.0034	0	3	GAIN	3.10163
1	55000001	56000000	3	GAIN	0.0065	0	3	GAIN	3.11252
1	56000001	57000000	3	GAIN	-0.0372	0	3	GAIN	2.96113
1	57000001	58000000	3	GAIN	-0.0121	0	3	GAIN	3.04752
1	58000001	59000000	3	GAIN	-0.0557	0	3	GAIN	2.89841
1	59000001	60000000	3	GAIN	-0.0114	0	3	GAIN	3.04996
1	60000001	61000000	3	GAIN	-0.0834	0	3	GAIN	2.80598
1	61000001	62000000	3	GAIN	0.007	0	3	GAIN	3.11428
1	62000001	63000000	3	GAIN	-0.0068	0	3	GAIN	3.06596
1	63000001	64000000	3	GAIN	-0.0921	0	3	GAIN	2.77732
1	64000001	65000000	2	NEUT	-0.3142	0	2	NEUT	2.10116
1	65000001	66000000	2	NEUT	-0.3966	0	2	NEUT	1.87561
1	66000001	67000000	2	NEUT	-0.4177	0	2	NEUT	1.8199
1	67000001	68000000	2	NEUT	-0.3226	0	2	NEUT	2.07757
1	68000001	69000000	2	NEUT	-0.4184	0	2	NEUT	1.81807
1	69000001	70000000	2	NEUT	-0.4419	0	2	NEUT	1.757
1	70000001	71000000	2	NEUT	-0.4042	0	2	NEUT	1.85545
1	71000001	72000000	2	NEUT	-0.3058	0	2	NEUT	2.12488
1	72000001	73000000	2	NEUT	-0.3052	0	2	NEUT	2.12658
1	73000001	74000000	2	NEUT	-0.2808	0	2	NEUT	2.19631
1	74000001	75000000	2	NEUT	-0.3902	0	2	NEUT	1.89267
1	75000001	76000000	2	NEUT	-0.3867	0	2	NEUT	1.90204
1	76000001	77000000	2	NEUT	-0.3585	0	2	NEUT	1.9783
1	77000001	78000000	2	NEUT	-0.4013	0	2	NEUT	1.86313
1	78000001	79000000	2	NEUT	-0.3616	0	2	NEUT	1.96984
1	79000001	80000000	2	NEUT	-0.339	0	2	NEUT	2.03192
1	80000001	81000000	2	NEUT	-0.2983	0	2	NEUT	2.14618
1	81000001	82000000	2	NEUT	-0.353	0	2	NEUT	1.99335
1	82000001	83000000	2	NEUT	-0.3295	0	2	NEUT	2.0583
1	84000001	85000000	2	NEUT	-0.3722	0	2	NEUT	1.94106
1	85000001	86000000	2	NEUT	-0.449	0	2	NEUT	1.73874
1	86000001	87000000	2	NEUT	-0.355	0	2	NEUT	1.98787
1	87000001	88000000	2	NEUT	-0.3208	0	2	NEUT	2.08261
1	88000001	89000000	2	NEUT	-0.3857	0	2	NEUT	1.90472
1	89000001	90000000	2	NEUT	-0.3111	0	2	NEUT	2.1099
1	90000001	91000000	2	NEUT	-0.3321	0	2	NEUT	2.05106
1	91000001	92000000	2	NEUT	-0.2954	0	2	NEUT	2.15445
1	92000001	93000000	2	NEUT	-0.4325	0	2	NEUT	1.78131
1	93000001	94000000	3	GAIN	-0.0687	0	3	GAIN	2.85481
1	94000001	95000000	3	GAIN	0.0431	0	3	GAIN	3.2429
1	95000001	96000000	3	GAIN	-0.0509	0	3	GAIN	2.9146
1	96000001	97000000	3	GAIN	-0.1199	0	3	GAIN	2.68688
1	97000001	98000000	3	GAIN	0.0336	0	3	GAIN	3.20874
1	98000001	99000000	3	GAIN	-0.0563	0	3	GAIN	2.89639
1	99000001	100000000	3	GAIN	-0.075	0	3	GAIN	2.83382
1	100000001	101000000	3	GAIN	-0.0395	0	3	GAIN	2.95329
1	101000001	102000000	3	GAIN	-0.1013	0	3	GAIN	2.7472
1	102000001	103000000	3	GAIN	-0.0578	0	3	GAIN	2.89134
1	105000001	106000000	3	GAIN	0.052	0	3	GAIN	3.2751
1	106000001	107000000	3	GAIN	-0.0101	0	3	GAIN	3.05447
1	107000001	108000000	3	GAIN	-0.0592	0	3	GAIN	2.88663
1	109000001	110000000	4	AMP	0.2955	0	4	AMP	4.23792
1	110000001	111000000	4	AMP	0.3286	0	4	AMP	4.38181
1	111000001	112000000	4	AMP	0.3044	0	4	AMP	4.27629
1	112000001	113000000	4	AMP	0.3277	0	4	AMP	4.37785
1	113000001	114000000	4	AMP	0.4427	0	4	AMP	4.90386
1	114000001	115000000	4	AMP	0.0576	0	4	AMP	3.29547
1	115000001	116000000	4	AMP	0.2819	0	4	AMP	4.17976
1	116000001	117000000	4	AMP	0.2606	0	4	AMP	4.08975
1	117000001	118000000	4	AMP	0.2998	0	4	AMP	4.25643
1	118000001	119000000	4	AMP	0.183	0	4	AMP	3.77286
1	119000001	120000000	4	AMP	0.2557	0	4	AMP	4.06923
1	150000001	151000000	4	AMP	0.2777	0	4	AMP	4.16191
1	151000001	152000000	4	AMP	0.3104	0	4	AMP	4.30228
1	152000001	153000000	4	AMP	0.1829	0	4	AMP	3.77246
1	153000001	154000000	4	AMP	0.2323	0	4	AMP	3.97221
1	154000001	155000000	4	AMP	0.2835	0	4	AMP	4.18657
1	155000001	156000000	4	AMP	0.295	0	4	AMP	4.23578
1	156000001	157000000	4	AMP	0.151	0	4	AMP	3.64707
1	157000001	158000000	4	AMP	0.1651	0	4	AMP	3.70215
1	158000001	159000000	4	AMP	0.1295	0	4	AMP	3.5641
1	159000001	160000000	4	AMP	0.1741	0	4	AMP	3.73759
1	160000001	161000000	4	AMP	0.2574	0	4	AMP	4.07635
1	162000001	163000000	4	AMP	0.2105	0	4	AMP	3.88322
1	163000001	164000000	4	AMP	0.1119	0	4	AMP	3.4971
1	164000001	165000000	4	AMP	0.1733	0	4	AMP	3.73443
1	165000001	166000000	4	AMP	0.2269	0	4	AMP	3.95004
1	166000001	167000000	4	AMP	0.1793	0	4	AMP	3.75817
1	167000001	168000000	4	AMP	0.273	0	4	AMP	4.14199
1	168000001	169000000	4	AMP	0.2033	0	4	AMP	3.85412
1	169000001	170000000	4	AMP	0.1676	0	4	AMP	3.71197
1	170000001	171000000	4	AMP	0.137	0	4	AMP	3.5929
1	171000001	172000000	4	AMP	0.1802	0	4	AMP	3.76174
1	172000001	173000000	4	AMP	0.1533	0	4	AMP	3.65602
1	173000001	174000000	4	AMP	0.186	0	4	AMP	3.7848
1	174000001	175000000	4	AMP	0.1263	0	4	AMP	3.55186
1	175000001	176000000	4	AMP	0.2207	0	4	AMP	3.92469
1	176000001	177000000	4	AMP	0.1789	0	4	AMP	3.75659
1	177000001	178000000	4	AMP	0.2368	0	4	AMP	3.99074
1	178000001	179000000	4	AMP	0.1922	0	4	AMP	3.80955
1	179000001	180000000	4	AMP	0.2197	0	4	AMP	3.92061
1	180000001	181000000	4	AMP	0.2329	0	4	AMP	3.97467
1	181000001	182000000	4	AMP	0.2074	0	4	AMP	3.87067
1	182000001	183000000	4	AMP	0.2874	0	4	AMP	4.20322
1	183000001	184000000	4	AMP	0.2728	0	4	AMP	4.14114
1	184000001	185000000	4	AMP	0.217	0	4	AMP	3.90961
1	185000001	186000000	4	AMP	0.148	0	4	AMP	3.63542
1	186000001	187000000	4	AMP	0.1622	0	4	AMP	3.69078
1	187000001	188000000	4	AMP	0.1356	0	4	AMP	3.58752
1	188000001	189000000	4	AMP	0.2427	0	4	AMP	4.01514
1	189000001	190000000	4	AMP	NA	0	4	AMP	NA
1	190000001	191000000	4	AMP	NA	0	4	AMP	NA
1	191000001	192000000	4	AMP	0.2288	0	4	AMP	3.95783
1	192000001	193000000	4	AMP	0.1929	0	4	AMP	3.81235
1	193000001	194000000	4	AMP	0.1326	0	4	AMP	3.57599
1	194000001	195000000	4	AMP	0.2207	0	4	AMP	3.92469
1	195000001	196000000	4	AMP	0.2837	0	4	AMP	4.18743
1	196000001	197000000	4	AMP	0.213	0	4	AMP	3.89335
1	197000001	198000000	4	AMP	0.1396	0	4	AMP	3.60292
1	198000001	199000000	4	AMP	0.2579	0	4	AMP	4.07844
1	199000001	200000000	4	AMP	0.1338	0	4	AMP	3.5806
1	200000001	201000000	4	AMP	0.2176	0	4	AMP	3.91205
1	201000001	202000000	4	AMP	0.1886	0	4	AMP	3.79516
1	202000001	203000000	4	AMP	0.2437	0	4	AMP	4.01928
1	203000001	204000000	4	AMP	0.1996	0	4	AMP	3.83922
1	204000001	205000000	4	AMP	0.2926	0	4	AMP	4.22548
1	205000001	206000000	4	AMP	NA	0	4	AMP	NA
1	207000001	208000000	4	AMP	0.2004	0	4	AMP	3.84244
1	208000001	209000000	4	AMP	0.2087	0	4	AMP	3.87593
1	209000001	210000000	4	AMP	0.2711	0	4	AMP	4.13396
1	210000001	211000000	4	AMP	0.2394	0	4	AMP	4.00148
1	211000001	212000000	4	AMP	0.2342	0	4	AMP	3.98003
1	212000001	213000000	4	AMP	0.2783	0	4	AMP	4.16445
1	213000001	214000000	4	AMP	0.2514	0	4	AMP	4.05129
1	214000001	215000000	4	AMP	0.2912	0	4	AMP	4.21947
1	215000001	216000000	4	AMP	0.2445	0	4	AMP	4.0226
1	216000001	217000000	4	AMP	0.2285	0	4	AMP	3.9566
1	217000001	218000000	4	AMP	0.1827	0	4	AMP	3.77167
1	218000001	219000000	4	AMP	0.2159	0	4	AMP	3.90513
1	219000001	220000000	4	AMP	0.1712	0	4	AMP	3.72615
1	220000001	221000000	4	AMP	0.2118	0	4	AMP	3.88849
1	221000001	222000000	4	AMP	0.186	0	4	AMP	3.7848
1	222000001	223000000	4	AMP	0.1549	0	4	AMP	3.66225
1	225000001	226000000	4	AMP	0.2004	0	4	AMP	3.84244
1	226000001	227000000	4	AMP	0.2881	0	4	AMP	4.20621
1	227000001	228000000	4	AMP	0.229	0	4	AMP	3.95865
1	229000001	230000000	4	AMP	0.2773	0	4	AMP	4.16021
1	230000001	231000000	4	AMP	0.2332	0	4	AMP	3.97591
1	231000001	232000000	4	AMP	0.2694	0	4	AMP	4.12678
1	232000001	233000000	4	AMP	0.1792	0	4	AMP	3.75778
1	233000001	234000000	4	AMP	0.2555	0	4	AMP	4.0684
1	234000001	235000000	4	AMP	0.2522	0	4	AMP	4.05462
1	235000001	236000000	4	AMP	NA	0	4	AMP	NA
1	236000001	237000000	4	AMP	0.2447	0	4	AMP	4.02343
1	237000001	238000000	4	AMP	0.1567	0	4	AMP	3.66927
1	238000001	239000000	5	HLAMP	0.4954	0	5	HLAMP	5.15929
1	239000001	240000000	5	HLAMP	0.5647	0	6	HLAMP	5.50969
1	240000001	241000000	5	HLAMP	0.617	0	6	HLAMP	5.7855
1	241000001	242000000	5	HLAMP	0.6395	0	6	HLAMP	5.90727
1	244000001	245000000	5	HLAMP	0.6507	0	6	HLAMP	5.9686
1	245000001	246000000	5	HLAMP	0.6535	0	6	HLAMP	5.984
1	246000001	247000000	5	HLAMP	0.6186	0	6	HLAMP	5.7941
1	247000001	248000000	5	HLAMP	0.5976	0	6	HLAMP	5.68203
2	1	1000000	3	GAIN	NA	0	3	GAIN	NA
2	1000001	2000000	3	GAIN	-0.0976	0	3	GAIN	2.75929
2	2000001	3000000	3	GAIN	-0.022	0	3	GAIN	3.01327
2	3000001	4000000	3	GAIN	NA	0	3	GAIN	NA
2	4000001	5000000	3	GAIN	-0.0561	0	3	GAIN	2.89706
2	6000001	7000000	3	GAIN	-0.0325	0	3	GAIN	2.97719
2	7000001	8000000	3	GAIN	-0.0243	0	3	GAIN	3.00534
2	8000001	9000000	3	GAIN	0.0388	0	3	GAIN	3.22741
2	9000001	10000000	3	GAIN	0.0292	0	3	GAIN	3.19299
2	10000001	11000000	3	GAIN	0.0376	0	3	GAIN	3.22309
2	11000001	12000000	3	GAIN	0.0128	0	3	GAIN	3.13473
2	12000001	13000000	3	GAIN	-0.0048	0	3	GAIN	3.07293
2	13000001	14000000	3	GAIN	-0.0489	0	3	GAIN	2.92137
2	14000001	15000000	3	GAIN	-0.0314	0	3	GAIN	2.98096
2	15000001	16000000	3	GAIN	-0.0119	0	3	GAIN	3.04822
2	16000001	17000000	3	GAIN	NA	0	3	GAIN	NA
2	17000001	18000000	3	GAIN	-0.0918	0	3	GAIN	2.77831
2	18000001	19000000	3	GAIN	-0.0558	0	3	GAIN	2.89807
2	19000001	20000000	3	GAIN	0.0744	0	3	GAIN	3.35704
2	20000001	21000000	3	GAIN	NA	0	3	GAIN	NA
2	21000001	22000000	3	GAIN	NA	0	3	GAIN	NA
2	22000001	23000000	3	GAIN	-0.0254	0	3	GAIN	3.00156
2	23000001	24000000	3	GAIN	-0.0416	0	3	GAIN	2.94614
2	24000001	25000000	3	GAIN	0.0436	0	3	GAIN	3.2447
2	25000001	26000000	3	GAIN	-0.0065	0	3	GAIN	3.06701
2	26000001	27000000	3	GAIN	0.0153	0	3	GAIN	3.14357
2	27000001	28000000	3	GAIN	0.0618	0	3	GAIN	3.31079
2	28000001	29000000	3	GAIN	0.0475	0	3	GAIN	3.25879
2	29000001	30000000	3	GAIN	-0.046	0	3	GAIN	2.93119
2	30000001	31000000	3	GAIN	0.0271	0	3	GAIN	3.18549
2	31000001	32000000	3	GAIN	NA	0	3	GAIN	NA
2	32000001	33000000	3	GAIN	NA	0	3	GAIN	NA
2	33000001	34000000	3	GAIN	NA	0	3	GAIN	NA
2	34000001	35000000	3	GAIN	-0.0896	0	3	GAIN	2.78554
2	35000001	36000000	3	GAIN	-0.0157	0	3	GAIN	3.03504
2	36000001	37000000	3	GAIN	-0.0669	0	3	GAIN	2.86082
2	37000001	38000000	3	GAIN	0.0734	0	3	GAIN	3.35336
2	38000001	39000000	3	GAIN	0.2673	0	3	GAIN	4.11792
2	39000001	40000000	3	GAIN	-0.0193	0	3	GAIN	3.02259
2	40000001	41000000	3	GAIN	-0.0654	0	3	GAIN	2.86584
2	41000001	42000000	3	GAIN	-0.1131	0	3	GAIN	2.70884
2	42000001	43000000	3	GAIN	-0.0114	0	3	GAIN	3.04996
2	43000001	44000000	3	GAIN	0.0644	0	3	GAIN	3.3203
2	44000001	45000000	3	GAIN	-0.1708	0	3	GAIN	2.52573
2	45000001	46000000	3	GAIN	-0.315	0	3	GAIN	2.0989
2	46000001	47000000	3	GAIN	0.3723	0	3	GAIN	4.57689
2	47000001	48000000	3	GAIN	0.0345	0	3	GAIN	3.21196
2	48000001	49000000	3	GAIN	0.0164	0	3	GAIN	3.14746
2	49000001	50000000	3	GAIN	-0.0703	0	3	GAIN	2.84947
2	50000001	51000000	3	GAIN	0.0245	0	3	GAIN	3.17623
2	51000001	52000000	3	GAIN	-0.0427	0	3	GAIN	2.9424
2	52000001	53000000	3	GAIN	-0.0349	0	3	GAIN	2.96898
2	53000001	54000000	3	GAIN	-0.0704	0	3	GAIN	2.84914
2	54000001	55000000	3	GAIN	0.0353	0	3	GAIN	3.21483
2	55000001	56000000	3	GAIN	0.0046	0	3	GAIN	3.10584
2	56000001	57000000	3	GAIN	-0.0724	0	3	GAIN	2.84247
2	57000001	58000000	3	GAIN	-0.0277	0	3	GAIN	2.99365
2	58000001	59000000	3	GAIN	-0.0811	0	3	GAIN	2.81359
2	59000001	60000000	3	GAIN	-0.1114	0	3	GAIN	2.71435
2	60000001	61000000	3	GAIN	-0.0605	0	3	GAIN	2.88226
2	61000001	62000000	3	GAIN	0.0407	0	3	GAIN	3.23424
2	62000001	63000000	3	GAIN	-0.0003	0	3	GAIN	3.08866
2	63000001	64000000	3	GAIN	-0.0435	0	3	GAIN	2.93968
2	64000001	65000000	3	GAIN	0.088	0	3	GAIN	3.40742
2	65000001	66000000	3	GAIN	0.0163	0	3	GAIN	3.14711
2	66000001	67000000	3	GAIN	-0.0888	0	3	GAIN	2.78817
2	67000001	68000000	3	GAIN	-0.0929	0	3	GAIN	2.77469
2	68000001	69000000	3	GAIN	-0.0078	0	3	GAIN	3.06248
2	69000001	70000000	3	GAIN	-0.0019	0	3	GAIN	3.08306
2	70000001	71000000	3	GAIN	0.0864	0	3	GAIN	3.40147
2	71000001	72000000	3	GAIN	-0.0216	0	3	GAIN	3.01465
2	72000001	73000000	3	GAIN	-0.0539	0	3	GAIN	2.90447
2	73000001	74000000	3	GAIN	-0.0243	0	3	GAIN	3.00534
2	74000001	75000000	3	GAIN	0.06	0	3	GAIN	3.30422
2	75000001	76000000	3	GAIN	-0.0146	0	3	GAIN	3.03885
2	76000001	77000000	3	GAIN	-0.0704	0	3	GAIN	2.84914
2	77000001	78000000	3	GAIN	-0.0544	0	3	GAIN	2.90279
2	78000001	79000000	3	GAIN	-0.0289	0	3	GAIN	2.98953
2	79000001	80000000	3	GAIN	-0.0619	0	3	GAIN	2.87757
2	80000001	81000000	3	GAIN	-0.0551	0	3	GAIN	2.90043
2	81000001	82000000	3	GAIN	-0.0112	0	3	GAIN	3.05065
2	82000001	83000000	3	GAIN	-0.0075	0	3	GAIN	3.06352
2	83000001	84000000	3	GAIN	-0.0177	0	3	GAIN	3.02812
2	84000001	85000000	3	GAIN	-0.0627	0	3	GAIN	2.87488
2	85000001	86000000	3	GAIN	0.0219	0	3	GAIN	3.16698
2	99000001	100000000	3	GAIN	-0.0139	0	3	GAIN	3.04128
2	100000001	101000000	3	GAIN	-0.0225	0	3	GAIN	3.01154
2	101000001	102000000	3	GAIN	0.0436	0	3	GAIN	3.2447
2	102000001	103000000	3	GAIN	-0.0277	0	3	GAIN	2.99365
2	103000001	104000000	3	GAIN	-0.0717	0	3	GAIN	2.84481
2	104000001	105000000	3	GAIN	-0.0381	0	3	GAIN	2.95806
2	105000001	106000000	3	GAIN	-0.0047	0	3	GAIN	3.07328
2	107000001	108000000	3	GAIN	-0.1585	0	3	GAIN	2.56416
2	115000001	116000000	3	GAIN	-0.0581	0	3	GAIN	2.89033
2	116000001	117000000	3	GAIN	-0.0125	0	3	GAIN	3.04614
2	117000001	118000000	3	GAIN	-0.0324	0	3	GAIN	2.97753
2	118000001	119000000	3	GAIN	-0.0279	0	3	GAIN	2.99296
2	119000001	120000000	3	GAIN	-0.0098	0	3	GAIN	3.05552
2	120000001	121000000	3	GAIN	0.1067	0	3	GAIN	3.47746
2	121000001	122000000	3	GAIN	-0.0811	0	3	GAIN	2.81359
2	122000001	123000000	2	NEUT	-0.1926	0	2	NEUT	2.45844
2	123000001	124000000	2	NEUT	-0.3694	0	2	NEUT	1.94865
2	124000001	125000000	2	NEUT	-0.434	0	2	NEUT	1.77742
2	125000001	126000000	2	NEUT	-0.4049	0	2	NEUT	1.8536
2	126000001	127000000	2	NEUT	-0.2898	0	2	NEUT	2.17045
2	127000001	128000000	2	NEUT	-0.3478	0	2	NEUT	2.00763
2	128000001	129000000	2	NEUT	-0.2792	0	2	NEUT	2.20093
2	129000001	130000000	2	NEUT	-0.4288	0	2	NEUT	1.79092
2	133000001	134000000	2	NEUT	-0.5625	0	2	NEUT	1.45879
2	134000001	135000000	2	NEUT	-0.3621	0	2	NEUT	1.96848
2	135000001	136000000	2	NEUT	-0.3759	0	2	NEUT	1.93107
2	136000001	137000000	2	NEUT	-0.28	0	2	NEUT	2.19862
2	137000001	138000000	2	NEUT	-0.4375	0	2	NEUT	1.76836
2	138000001	139000000	2	NEUT	-0.3839	0	2	NEUT	1.90954
2	139000001	140000000	2	NEUT	-0.3515	0	2	NEUT	1.99746
2	140000001	141000000	2	NEUT	-0.2486	0	2	NEUT	2.29016
2	141000001	142000000	2	NEUT	-0.2995	0	2	NEUT	2.14277
2	142000001	143000000	2	NEUT	-0.362	0	2	NEUT	1.96875
2	143000001	144000000	2	NEUT	-0.3881	0	2	NEUT	1.89829
2	144000001	145000000	2	NEUT	-0.3442	0	2	NEUT	2.01755
2	145000001	146000000	2	NEUT	-0.2841	0	2	NEUT	2.18681
2	146000001	147000000	2	NEUT	-0.371	0	2	NEUT	1.94431
2	147000001	148000000	2	NEUT	-0.3954	0	2	NEUT	1.87881
2	148000001	149000000	2	NEUT	-0.4197	0	2	NEUT	1.81466
2	150000001	151000000	2	NEUT	-0.3672	0	2	NEUT	1.95461
2	151000001	152000000	2	NEUT	-0.1918	0	2	NEUT	2.46089
2	152000001	153000000	3	GAIN	0.0401	0	3	GAIN	3.23208
2	153000001	154000000	3	GAIN	-0.0478	0	3	GAIN	2.92509
2	154000001	155000000	3	GAIN	0.0034	0	3	GAIN	3.10163
2	155000001	156000000	3	GAIN	0.0627	0	3	GAIN	3.31408
2	156000001	157000000	3	GAIN	-0.0985	0	3	GAIN	2.75634
2	157000001	158000000	3	GAIN	-0.0424	0	3	GAIN	2.94342
2	158000001	159000000	3	GAIN	0.0005	0	3	GAIN	3.09146
2	159000001	160000000	3	GAIN	-0.0691	0	3	GAIN	2.85348
2	160000001	161000000	3	GAIN	-0.0195	0	3	GAIN	3.0219
2	161000001	162000000	3	GAIN	-0.0586	0	3	GAIN	2.88865
2	162000001	163000000	3	GAIN	-0.1067	0	3	GAIN	2.72961
2	163000001	164000000	3	GAIN	-0.0076	0	3	GAIN	3.06317
2	164000001	165000000	3	GAIN	0.0224	0	3	GAIN	3.16875
2	165000001	166000000	3	GAIN	-0.0729	0	3	GAIN	2.84081
2	166000001	167000000	3	GAIN	-0.0444	0	3	GAIN	2.93662
2	167000001	168000000	3	GAIN	-0.0865	0	3	GAIN	2.79575
2	168000001	169000000	3	GAIN	-0.0086	0	3	GAIN	3.05969
2	169000001	170000000	3	GAIN	-0.0937	0	3	GAIN	2.77207
2	170000001	171000000	3	GAIN	-0.0224	0	3	GAIN	3.01189
2	171000001	172000000	3	GAIN	-0.0158	0	3	GAIN	3.03469
2	172000001	173000000	3	GAIN	0.0454	0	3	GAIN	3.2512
2	173000001	174000000	3	GAIN	-0.0356	0	3	GAIN	2.96659
2	174000001	175000000	3	GAIN	-0.037	0	3	GAIN	2.96181
2	175000001	176000000	3	GAIN	-0.0561	0	3	GAIN	2.89706
2	176000001	177000000	4	AMP	0.2541	0	4	AMP	4.06255
2	177000001	178000000	4	AMP	0.2124	0	4	AMP	3.89092
2	178000001	179000000	4	AMP	0.2392	0	4	AMP	4.00065
2	179000001	180000000	4	AMP	0.2216	0	4	AMP	3.92836
2	180000001	181000000	4	AMP	0.2327	0	4	AMP	3.97385
2	181000001	182000000	4	AMP	0.2114	0	4	AMP	3.88686
2	182000001	183000000	4	AMP	0.1517	0	4	AMP	3.64979
2	183000001	184000000	4	AMP	0.1661	0	4	AMP	3.70608
2	184000001	185000000	4	AMP	0.3802	0	4	AMP	4.61279
2	185000001	186000000	4	AMP	NA	0	4	AMP	NA
2	186000001	187000000	4	AMP	0.1461	0	4	AMP	3.62805
2	187000001	188000000	4	AMP	0.2089	0	4	AMP	3.87674
2	188000001	189000000	4	AMP	0.3155	0	4	AMP	4.32447
2	189000001	190000000	4	AMP	0.2149	0	4	AMP	3.90107
2	190000001	191000000	4	AMP	0.2732	0	4	AMP	4.14283
2	191000001	192000000	4	AMP	0.2882	0	4	AMP	4.20663
2	192000001	193000000	4	AMP	0.2433	0	4	AMP	4.01762
2	193000001	194000000	4	AMP	NA	0	4	AMP	NA
2	194000001	195000000	4	AMP	0.3233	0	4	AMP	4.35854
2	195000001	196000000	4	AMP	0.1265	0	4	AMP	3.55262
2	196000001	197000000	4	AMP	0.1433	0	4	AMP	3.61721
2	197000001	198000000	4	AMP	0.2339	0	4	AMP	3.97879
2	198000001	199000000	4	AMP	0.2349	0	4	AMP	3.98291
2	199000001	200000000	3	GAIN	-0.083	0	3	GAIN	2.80731
2	200000001	201000000	3	GAIN	0.017	0	3	GAIN	3.14959
2	201000001	202000000	3	GAIN	0.2073	0	3	GAIN	3.87027
2	202000001	203000000	3	GAIN	-0.0679	0	3	GAIN	2.85748
2	203000001	204000000	3	GAIN	0.0626	0	3	GAIN	3.31372
2	204000001	205000000	3	GAIN	-0.0459	0	3	GAIN	2.93153
2	205000001	206000000	3	GAIN	-0.0239	0	3	GAIN	3.00672
2	206000001	207000000	3	GAIN	-0.0519	0	3	GAIN	2.91123
2	207000001	208000000	3	GAIN	-0.0113	0	3	GAIN	3.0503
2	208000001	209000000	3	GAIN	-0.0579	0	3	GAIN	2.891
2	209000001	210000000	3	GAIN	-0.0813	0	3	GAIN	2.81293
2	210000001	211000000	3	GAIN	-0.0807	0	3	GAIN	2.81492
2	211000001	212000000	3	GAIN	0.002	0	3	GAIN	3.09672
2	212000001	213000000	3	GAIN	0.0404	0	3	GAIN	3.23316
2	213000001	214000000	3	GAIN	-0.024	0	3	GAIN	3.00638
2	214000001	215000000	3	GAIN	-0.0333	0	3	GAIN	2.97445
2	215000001	216000000	3	GAIN	-0.0481	0	3	GAIN	2.92408
2	216000001	217000000	3	GAIN	0.0307	0	3	GAIN	3.19835
2	217000001	218000000	3	GAIN	-0.0166	0	3	GAIN	3.03192
2	218000001	219000000	3	GAIN	-0.0458	0	3	GAIN	2.93187
2	219000001	220000000	3	GAIN	0.0966	0	3	GAIN	3.43952
2	220000001	221000000	3	GAIN	-0.0022	0	3	GAIN	3.08202
2	221000001	222000000	3	GAIN	0.0286	0	3	GAIN	3.19085
2	222000001	223000000	4	AMP	0.2759	0	4	AMP	4.15427
2	223000001	224000000	4	AMP	0.2777	0	4	AMP	4.16191
2	224000001	225000000	4	AMP	0.2711	0	4	AMP	4.13396
2	225000001	226000000	4	AMP	0.258	0	4	AMP	4.07886
2	226000001	227000000	4	AMP	0.1749	0	4	AMP	3.74076
2	227000001	228000000	4	AMP	0.2708	0	4	AMP	4.13269
2	228000001	229000000	4	AMP	0.1504	0	4	AMP	3.64473
2	229000001	230000000	4	AMP	0.2693	0	4	AMP	4.12636
2	230000001	231000000	4	AMP	0.2462	0	4	AMP	4.02965
2	231000001	232000000	4	AMP	0.2677	0	4	AMP	4.11961
2	232000001	233000000	4	AMP	0.2345	0	4	AMP	3.98126
2	233000001	234000000	4	AMP	NA	0	4	AMP	NA
2	234000001	235000000	4	AMP	NA	0	4	AMP	NA
2	235000001	236000000	4	AMP	0.2143	0	4	AMP	3.89863
2	236000001	237000000	4	AMP	0.2006	0	4	AMP	3.84325
2	237000001	238000000	4	AMP	0.2648	0	4	AMP	4.1074
2	238000001	239000000	4	AMP	NA	0	4	AMP	NA
2	239000001	240000000	4	AMP	NA	0	4	AMP	NA
2	240000001	241000000	4	AMP	NA	0	4	AMP	NA
2	241000001	242000000	4	AMP	0.1162	0	4	AMP	3.5134
3	1000001	2000000	5	HLAMP	0.6354	0	6	HLAMP	5.88494
3	2000001	3000000	5	HLAMP	0.6108	0	6	HLAMP	5.75228
3	3000001	4000000	5	HLAMP	0.6214	0	6	HLAMP	5.80917
3	4000001	5000000	5	HLAMP	0.7031	0	6	HLAMP	6.26193
3	5000001	6000000	5	HLAMP	0.6706	0	6	HLAMP	6.07874
3	6000001	7000000	5	HLAMP	0.559	0	5	HLAMP	5.48023
3	7000001	8000000	5	HLAMP	0.6261	0	6	HLAMP	5.83452
3	8000001	9000000	5	HLAMP	0.6911	0	6	HLAMP	6.19381
3	9000001	10000000	5	HLAMP	0.6935	0	6	HLAMP	6.20739
3	10000001	11000000	5	HLAMP	0.489	0	5	HLAMP	5.12777
3	11000001	12000000	4	AMP	0.2422	0	4	AMP	4.01306
3	12000001	13000000	4	AMP	0.3689	0	4	AMP	4.5615
3	13000001	14000000	4	AMP	0.1319	0	4	AMP	3.5733
3	14000001	15000000	4	AMP	0.2641	0	4	AMP	4.10445
3	15000001	16000000	4	AMP	0.2627	0	4	AMP	4.09857
3	16000001	17000000	4	AMP	NA	0	4	AMP	NA
3	17000001	18000000	4	AMP	0.2094	0	4	AMP	3.87876
3	18000001	19000000	4	AMP	0.1403	0	4	AMP	3.60562
3	19000001	20000000	4	AMP	0.1311	0	4	AMP	3.57023
3	20000001	21000000	4	AMP	0.2188	0	4	AMP	3.91694
3	21000001	22000000	4	AMP	0.2225	0	4	AMP	3.93204
3	22000001	23000000	4	AMP	0.1585	0	4	AMP	3.6763
3	23000001	24000000	4	AMP	0.2461	0	4	AMP	4.02924
3	24000001	25000000	4	AMP	0.2381	0	4	AMP	3.99611
3	25000001	26000000	4	AMP	0.2395	0	4	AMP	4.00189
3	26000001	27000000	4	AMP	0.2111	0	4	AMP	3.88565
3	27000001	28000000	4	AMP	0.2209	0	4	AMP	3.9255
3	28000001	29000000	4	AMP	0.1952	0	4	AMP	3.82156
3	29000001	30000000	4	AMP	0.2525	0	4	AMP	4.05587
3	30000001	31000000	4	AMP	0.1976	0	4	AMP	3.83119
3	31000001	32000000	4	AMP	0.2679	0	4	AMP	4.12045
3	32000001	33000000	4	AMP	0.3344	0	4	AMP	4.40736
3	33000001	34000000	4	AMP	0.2708	0	4	AMP	4.13269
3	34000001	35000000	4	AMP	0.1844	0	4	AMP	3.77843
3	35000001	36000000	4	AMP	0.2382	0	4	AMP	3.99652
3	36000001	37000000	4	AMP	0.2028	0	4	AMP	3.8521
3	37000001	38000000	4	AMP	0.3343	0	4	AMP	4.40692
3	38000001	39000000	4	AMP	0.2268	0	4	AMP	3.94963
3	39000001	40000000	4	AMP	0.2563	0	4	AMP	4.07174
3	40000001	41000000	4	AMP	0.2067	0	4	AMP	3.86784
3	41000001	42000000	4	AMP	0.2073	0	4	AMP	3.87027
3	42000001	43000000	4	AMP	0.2694	0	4	AMP	4.12678
3	43000001	44000000	2	NEUT	-0.2131	0	2	NEUT	2.39608
3	44000001	45000000	2	NEUT	-0.3335	0	2	NEUT	2.04717
3	45000001	46000000	2	NEUT	-0.2934	0	2	NEUT	2.16016
3	46000001	47000000	2	NEUT	-0.3494	0	2	NEUT	2.00323
3	47000001	48000000	2	NEUT	-0.1111	0	2	NEUT	2.71532
3	48000001	49000000	2	NEUT	-0.0445	0	2	NEUT	2.93628
3	49000001	50000000	2	NEUT	-0.2691	0	2	NEUT	2.23017
3	50000001	51000000	2	NEUT	-0.285	0	2	NEUT	2.18422
3	51000001	52000000	2	NEUT	-0.3524	0	2	NEUT	1.99499
3	52000001	53000000	2	NEUT	-0.2581	0	2	NEUT	2.26225
3	53000001	54000000	2	NEUT	-0.3284	0	2	NEUT	2.06136
3	54000001	55000000	2	NEUT	-0.39	0	2	NEUT	1.89321
3	55000001	56000000	2	NEUT	-0.2998	0	2	NEUT	2.14191
3	56000001	57000000	2	NEUT	-0.32	0	2	NEUT	2.08486
3	57000001	58000000	2	NEUT	-0.3167	0	2	NEUT	2.09412
3	58000001	59000000	2	NEUT	-0.3454	0	2	NEUT	2.01424
3	59000001	60000000	2	NEUT	-0.347	0	2	NEUT	2.00983
3	60000001	61000000	2	NEUT	NA	0	2	NEUT	NA
3	61000001	62000000	2	NEUT	-0.3642	0	2	NEUT	1.96277
3	62000001	63000000	2	NEUT	-0.2888	0	2	NEUT	2.17332
3	63000001	64000000	2	NEUT	-0.3865	0	2	NEUT	1.90257
3	64000001	65000000	2	NEUT	-0.3045	0	2	NEUT	2.12857
3	65000001	66000000	2	NEUT	-0.317	0	2	NEUT	2.09328
3	67000001	68000000	2	NEUT	-0.3554	0	2	NEUT	1.98678
3	68000001	69000000	2	NEUT	-0.3301	0	2	NEUT	2.05663
3	69000001	70000000	2	NEUT	-0.2863	0	2	NEUT	2.18049
3	70000001	71000000	2	NEUT	-0.4124	0	2	NEUT	1.83382
3	71000001	72000000	2	NEUT	-0.2163	0	2	NEUT	2.38642
3	72000001	73000000	2	NEUT	-0.2645	0	2	NEUT	2.24356
3	73000001	74000000	2	NEUT	-0.2869	0	2	NEUT	2.17877
3	74000001	75000000	2	NEUT	-0.3309	0	2	NEUT	2.0544
3	76000001	77000000	2	NEUT	-0.3554	0	2	NEUT	1.98678
3	77000001	78000000	2	NEUT	-0.3441	0	2	NEUT	2.01782
3	78000001	79000000	2	NEUT	-0.385	0	2	NEUT	1.90659
3	79000001	80000000	2	NEUT	-0.3115	0	2	NEUT	2.10877
3	80000001	81000000	2	NEUT	-0.3023	0	2	NEUT	2.13481
3	81000001	82000000	2	NEUT	-0.4008	0	2	NEUT	1.86446
3	82000001	83000000	2	NEUT	-0.3607	0	2	NEUT	1.9723
3	83000001	84000000	5	HLAMP	NA	0	NA	NA	NA
3	84000001	85000000	5	HLAMP	0.0183	0	3	GAIN	3.15419
3	85000001	86000000	5	HLAMP	NA	0	NA	NA	NA
3	86000001	87000000	5	HLAMP	0.2487	0	4	AMP	4.04004
3	95000001	96000000	5	HLAMP	0.2675	0	4	AMP	4.11876
3	96000001	97000000	5	HLAMP	0.2052	0	4	AMP	3.86178
3	97000001	98000000	5	HLAMP	0.424	0	5	HLAMP	4.81545
3	98000001	99000000	5	HLAMP	0.6064	0	6	HLAMP	5.72879
3	99000001	100000000	5	HLAMP	0.6345	0	6	HLAMP	5.88005
3	100000001	101000000	5	HLAMP	0.6002	0	6	HLAMP	5.69581
3	101000001	102000000	5	HLAMP	0.6456	0	6	HLAMP	5.94061
3	102000001	103000000	5	HLAMP	0.6757	0	6	HLAMP	6.10722
3	103000001	104000000	5	HLAMP	0.6918	0	6	HLAMP	6.19777
3	104000001	105000000	5	HLAMP	0.6939	0	6	HLAMP	6.20965
3	105000001	106000000	5	HLAMP	0.6417	0	6	HLAMP	5.91928
3	106000001	107000000	5	HLAMP	0.6234	0	6	HLAMP	5.81995
3	107000001	108000000	5	HLAMP	0.6095	0	6	HLAMP	5.74533
3	108000001	109000000	4	AMP	0.1641	0	4	AMP	3.69823
3	109000001	110000000	4	AMP	0.1396	0	4	AMP	3.60292
3	110000001	111000000	4	AMP	0.267	0	4	AMP	4.11666
3	111000001	112000000	4	AMP	0.1942	0	4	AMP	3.81755
3	112000001	113000000	4	AMP	0.1917	0	4	AMP	3.80755
3	113000001	114000000	4	AMP	0.2613	0	4	AMP	4.09269
3	114000001	115000000	4	AMP	0.208	0	4	AMP	3.8731
3	115000001	116000000	4	AMP	0.2042	0	4	AMP	3.85775
3	116000001	117000000	4	AMP	0.2022	0	4	AMP	3.84969
3	117000001	118000000	4	AMP	0.215	0	4	AMP	3.90148
3	118000001	119000000	4	AMP	0.1766	0	4	AMP	3.74748
3	119000001	120000000	4	AMP	0.2586	0	4	AMP	4.08137
3	120000001	121000000	4	AMP	0.2161	0	4	AMP	3.90595
3	121000001	122000000	4	AMP	0.1604	0	4	AMP	3.68373
3	122000001	123000000	4	AMP	0.2542	0	4	AMP	4.06297
3	123000001	124000000	4	AMP	0.2487	0	4	AMP	4.04004
3	124000001	125000000	4	AMP	0.2937	0	4	AMP	4.23019
3	126000001	127000000	4	AMP	0.2149	0	4	AMP	3.90107
3	127000001	128000000	4	AMP	0.2995	0	4	AMP	4.25514
3	128000001	129000000	4	AMP	0.3335	0	4	AMP	4.40339
3	131000001	132000000	4	AMP	0.3155	0	4	AMP	4.32447
3	132000001	133000000	5	HLAMP	0.3588	0	5	HLAMP	4.51599
3	133000001	134000000	5	HLAMP	0.4698	0	5	HLAMP	5.03405
3	134000001	135000000	5	HLAMP	0.4708	0	5	HLAMP	5.0389
3	135000001	136000000	5	HLAMP	0.4241	0	5	HLAMP	4.81592
3	136000001	137000000	5	HLAMP	0.4374	0	5	HLAMP	4.87869
3	137000001	138000000	5	HLAMP	0.4324	0	5	HLAMP	4.85502
3	138000001	139000000	5	HLAMP	0.471	0	5	HLAMP	5.03987
3	139000001	140000000	5	HLAMP	0.4111	0	5	HLAMP	4.75512
3	140000001	141000000	5	HLAMP	0.4676	0	5	HLAMP	5.02339
3	141000001	142000000	5	HLAMP	0.4868	0	5	HLAMP	5.11697
3	142000001	143000000	5	HLAMP	0.397	0	5	HLAMP	4.6898
3	143000001	144000000	5	HLAMP	0.443	0	5	HLAMP	4.90529
3	144000001	145000000	5	HLAMP	0.4375	0	5	HLAMP	4.87916
3	145000001	146000000	5	HLAMP	0.4704	0	5	HLAMP	5.03696
3	146000001	147000000	5	HLAMP	0.5384	0	5	HLAMP	5.37472
3	147000001	148000000	5	HLAMP	0.6397	0	6	HLAMP	5.90836
3	148000001	149000000	5	HLAMP	0.6089	0	6	HLAMP	5.74213
3	149000001	150000000	5	HLAMP	0.6579	0	6	HLAMP	6.00827
3	150000001	151000000	5	HLAMP	0.7698	0	7	HLAMP	6.65105
3	151000001	152000000	5	HLAMP	0.5441	0	5	HLAMP	5.40377
3	152000001	153000000	5	HLAMP	0.6445	0	6	HLAMP	5.93459
3	153000001	154000000	5	HLAMP	0.5259	0	5	HLAMP	5.31143
3	154000001	155000000	5	HLAMP	0.5838	0	6	HLAMP	5.60926
3	155000001	156000000	5	HLAMP	0.5658	0	6	HLAMP	5.51539
3	156000001	157000000	5	HLAMP	0.6263	0	6	HLAMP	5.83561
3	157000001	158000000	5	HLAMP	0.5932	0	6	HLAMP	5.65875
3	158000001	159000000	5	HLAMP	0.5606	0	5	HLAMP	5.48849
3	159000001	160000000	5	HLAMP	0.6132	0	6	HLAMP	5.76513
3	160000001	161000000	5	HLAMP	0.6541	0	6	HLAMP	5.98731
3	161000001	162000000	5	HLAMP	0.5528	0	5	HLAMP	5.44832
3	162000001	163000000	5	HLAMP	0.6104	0	6	HLAMP	5.75014
3	163000001	164000000	5	HLAMP	0.6602	0	6	HLAMP	6.02099
3	164000001	165000000	5	HLAMP	0.6304	0	6	HLAMP	5.8578
3	165000001	166000000	5	HLAMP	0.6414	0	6	HLAMP	5.91764
3	166000001	167000000	5	HLAMP	0.696	0	6	HLAMP	6.22155
3	167000001	168000000	5	HLAMP	0.5515	0	5	HLAMP	5.44164
3	168000001	169000000	5	HLAMP	0.576	0	6	HLAMP	5.56844
3	169000001	170000000	5	HLAMP	0.6193	0	6	HLAMP	5.79786
3	170000001	171000000	5	HLAMP	0.6069	0	6	HLAMP	5.73146
3	171000001	172000000	5	HLAMP	0.6653	0	6	HLAMP	6.04926
3	172000001	173000000	5	HLAMP	0.6641	0	6	HLAMP	6.0426
3	173000001	174000000	5	HLAMP	0.6542	0	6	HLAMP	5.98786
3	174000001	175000000	5	HLAMP	0.6246	0	6	HLAMP	5.82642
3	175000001	176000000	5	HLAMP	0.6545	0	6	HLAMP	5.98951
3	176000001	177000000	5	HLAMP	0.6244	0	6	HLAMP	5.82534
3	177000001	178000000	5	HLAMP	0.2192	0	4	AMP	3.91857
3	178000001	179000000	3	GAIN	-0.0827	0	3	GAIN	2.8083
3	179000001	180000000	3	GAIN	-0.0339	0	3	GAIN	2.9724
3	180000001	181000000	3	GAIN	-0.0955	0	3	GAIN	2.76617
3	181000001	182000000	3	GAIN	-0.1185	0	3	GAIN	2.69139
3	182000001	183000000	3	GAIN	-0.0307	0	3	GAIN	2.98336
3	183000001	184000000	3	GAIN	0.0771	0	3	GAIN	3.36701
3	184000001	185000000	3	GAIN	0.0305	0	3	GAIN	3.19764
3	185000001	186000000	3	GAIN	0.0069	0	3	GAIN	3.11393
3	186000001	187000000	3	GAIN	0.0277	0	3	GAIN	3.18764
3	187000001	188000000	3	GAIN	0.0139	0	3	GAIN	3.13862
3	188000001	189000000	3	GAIN	-0.0046	0	3	GAIN	3.07363
3	189000001	190000000	3	GAIN	-0.0457	0	3	GAIN	2.93221
3	190000001	191000000	3	GAIN	0.0767	0	3	GAIN	3.36553
3	191000001	192000000	5	HLAMP	0.634	0	6	HLAMP	5.87733
3	192000001	193000000	5	HLAMP	0.6144	0	6	HLAMP	5.77155
3	193000001	194000000	5	HLAMP	0.6983	0	6	HLAMP	6.23461
3	194000001	195000000	5	HLAMP	NA	0	NA	NA	NA
3	196000001	197000000	5	HLAMP	0.5958	0	6	HLAMP	5.67249
4	1	1000000	2	NEUT	NA	0	2	NEUT	NA
4	1000001	2000000	2	NEUT	NA	0	2	NEUT	NA
4	2000001	3000000	2	NEUT	0.0038	0	2	NEUT	3.10303
4	5000001	6000000	2	NEUT	-0.4648	0	2	NEUT	1.69844
4	6000001	7000000	2	NEUT	-0.3861	0	2	NEUT	1.90364
4	7000001	8000000	2	NEUT	-0.5157	0	2	NEUT	1.57156
4	8000001	9000000	2	NEUT	NA	0	2	NEUT	NA
4	10000001	11000000	2	NEUT	-0.3228	0	2	NEUT	2.07701
4	11000001	12000000	2	NEUT	-0.4152	0	2	NEUT	1.82646
4	12000001	13000000	2	NEUT	-0.3956	0	2	NEUT	1.87828
4	13000001	14000000	2	NEUT	-0.3257	0	2	NEUT	2.0689
4	14000001	15000000	2	NEUT	-0.4249	0	2	NEUT	1.80108
4	15000001	16000000	2	NEUT	-0.2876	0	2	NEUT	2.17676
4	16000001	17000000	2	NEUT	-0.3251	0	2	NEUT	2.07058
4	17000001	18000000	2	NEUT	-0.2774	0	2	NEUT	2.20612
4	18000001	19000000	2	NEUT	-0.4215	0	2	NEUT	1.80995
4	19000001	20000000	2	NEUT	-0.3214	0	2	NEUT	2.08093
4	20000001	21000000	2	NEUT	-0.3271	0	2	NEUT	2.06499
4	21000001	22000000	2	NEUT	-0.3912	0	2	NEUT	1.89
4	22000001	23000000	2	NEUT	-0.4331	0	2	NEUT	1.77975
4	23000001	24000000	2	NEUT	-0.3462	0	2	NEUT	2.01203
4	24000001	25000000	2	NEUT	-0.3078	0	2	NEUT	2.11922
4	25000001	26000000	2	NEUT	-0.3013	0	2	NEUT	2.13765
4	26000001	27000000	2	NEUT	-0.35	0	2	NEUT	2.00158
4	27000001	28000000	2	NEUT	-0.3585	0	2	NEUT	1.9783
4	28000001	29000000	2	NEUT	-0.2905	0	2	NEUT	2.16845
4	29000001	30000000	2	NEUT	-0.2429	0	2	NEUT	2.30699
4	30000001	31000000	2	NEUT	-0.3135	0	2	NEUT	2.10313
4	31000001	32000000	2	NEUT	NA	0	2	NEUT	NA
4	32000001	33000000	2	NEUT	NA	0	2	NEUT	NA
4	33000001	34000000	2	NEUT	-0.28	0	2	NEUT	2.19862
4	34000001	35000000	2	NEUT	-0.2628	0	2	NEUT	2.24851
4	35000001	36000000	2	NEUT	-0.3269	0	2	NEUT	2.06555
4	36000001	37000000	2	NEUT	-0.3602	0	2	NEUT	1.97366
4	37000001	38000000	2	NEUT	-0.3015	0	2	NEUT	2.13708
4	38000001	39000000	2	NEUT	-0.275	0	2	NEUT	2.21306
4	39000001	40000000	2	NEUT	-0.2874	0	2	NEUT	2.17733
4	40000001	41000000	2	NEUT	NA	0	2	NEUT	NA
4	41000001	42000000	2	NEUT	-0.2947	0	2	NEUT	2.15644
4	42000001	43000000	2	NEUT	-0.4096	0	2	NEUT	1.84119
4	43000001	44000000	2	NEUT	-0.4275	0	2	NEUT	1.7943
4	44000001	45000000	2	NEUT	-0.3484	0	2	NEUT	2.00598
4	45000001	46000000	2	NEUT	-0.3062	0	2	NEUT	2.12375
4	46000001	47000000	4	AMP	0.2104	0	4	AMP	3.88281
4	47000001	48000000	4	AMP	0.1803	0	4	AMP	3.76214
4	53000001	54000000	4	AMP	0.2453	0	4	AMP	4.02592
4	54000001	55000000	4	AMP	0.2415	0	4	AMP	4.01017
4	55000001	56000000	4	AMP	0.1577	0	4	AMP	3.67317
4	56000001	57000000	4	AMP	0.1919	0	4	AMP	3.80835
4	57000001	58000000	4	AMP	0.1823	0	4	AMP	3.77008
4	58000001	59000000	4	AMP	NA	0	4	AMP	NA
4	59000001	60000000	4	AMP	NA	0	4	AMP	NA
4	60000001	61000000	4	AMP	0.2643	0	4	AMP	4.10529
4	61000001	62000000	4	AMP	0.1675	0	4	AMP	3.71158
4	62000001	63000000	4	AMP	0.2343	0	4	AMP	3.98044
4	63000001	64000000	4	AMP	0.261	0	4	AMP	4.09143
4	64000001	65000000	4	AMP	0.2263	0	4	AMP	3.94758
4	65000001	66000000	4	AMP	0.2616	0	4	AMP	4.09395
4	66000001	67000000	4	AMP	0.2941	0	4	AMP	4.23191
4	67000001	68000000	4	AMP	0.1796	0	4	AMP	3.75936
4	68000001	69000000	4	AMP	-0.2079	0	4	AMP	2.41181
4	70000001	71000000	4	AMP	0.1824	0	4	AMP	3.77048
4	71000001	72000000	4	AMP	0.1719	0	4	AMP	3.72891
4	72000001	73000000	4	AMP	0.1831	0	4	AMP	3.77326
4	73000001	74000000	4	AMP	0.149	0	4	AMP	3.6393
4	74000001	75000000	4	AMP	0.2309	0	4	AMP	3.96645
4	75000001	76000000	4	AMP	NA	0	4	AMP	NA
4	76000001	77000000	4	AMP	0.3259	0	4	AMP	4.36995
4	77000001	78000000	4	AMP	0.2825	0	4	AMP	4.18231
4	78000001	79000000	4	AMP	0.1538	0	4	AMP	3.65796
4	79000001	80000000	4	AMP	0.1949	0	4	AMP	3.82036
4	80000001	81000000	4	AMP	0.171	0	4	AMP	3.72536
4	81000001	82000000	4	AMP	0.148	0	4	AMP	3.63542
4	82000001	83000000	4	AMP	0.1804	0	4	AMP	3.76254
4	83000001	84000000	4	AMP	0.2298	0	4	AMP	3.96193
4	84000001	85000000	4	AMP	0.172	0	4	AMP	3.7293
4	85000001	86000000	4	AMP	0.1991	0	4	AMP	3.83721
4	86000001	87000000	4	AMP	0.1252	0	4	AMP	3.54766
4	87000001	88000000	4	AMP	0.1669	0	4	AMP	3.70922
4	88000001	89000000	4	AMP	0.2589	0	4	AMP	4.08263
4	89000001	90000000	4	AMP	0.2601	0	4	AMP	4.08766
4	90000001	91000000	4	AMP	0.1997	0	4	AMP	3.83963
4	91000001	92000000	4	AMP	0.1814	0	4	AMP	3.7665
4	92000001	93000000	4	AMP	0.2537	0	4	AMP	4.06088
4	93000001	94000000	4	AMP	0.2101	0	4	AMP	3.8816
4	94000001	95000000	4	AMP	0.1936	0	4	AMP	3.81515
4	95000001	96000000	4	AMP	0.2365	0	4	AMP	3.98951
4	96000001	97000000	4	AMP	0.2616	0	4	AMP	4.09395
4	97000001	98000000	4	AMP	0.2366	0	4	AMP	3.98992
4	98000001	99000000	4	AMP	0.1789	0	4	AMP	3.75659
4	99000001	100000000	4	AMP	0.192	0	4	AMP	3.80875
4	100000001	101000000	4	AMP	0.2179	0	4	AMP	3.91327
4	101000001	102000000	4	AMP	0.2232	0	4	AMP	3.9349
4	103000001	104000000	4	AMP	0.1851	0	4	AMP	3.78121
4	104000001	105000000	4	AMP	0.2069	0	4	AMP	3.86865
4	105000001	106000000	4	AMP	0.3395	0	4	AMP	4.42991
4	106000001	107000000	4	AMP	0.2428	0	4	AMP	4.01555
4	107000001	108000000	4	AMP	0.1755	0	4	AMP	3.74313
4	108000001	109000000	4	AMP	0.2844	0	4	AMP	4.19041
4	109000001	110000000	4	AMP	0.1428	0	4	AMP	3.61528
4	110000001	111000000	4	AMP	0.1323	0	4	AMP	3.57484
4	111000001	112000000	4	AMP	0.225	0	4	AMP	3.94226
4	112000001	113000000	4	AMP	0.121	0	4	AMP	3.53164
4	113000001	114000000	4	AMP	0.2604	0	4	AMP	4.08891
4	114000001	115000000	4	AMP	0.2514	0	4	AMP	4.05129
4	115000001	116000000	4	AMP	-0.0056	0	4	AMP	3.07014
4	116000001	117000000	2	NEUT	-0.2721	0	2	NEUT	2.22146
4	117000001	118000000	2	NEUT	-0.361	0	2	NEUT	1.97148
4	120000001	121000000	2	NEUT	-0.3603	0	2	NEUT	1.97339
4	121000001	122000000	2	NEUT	-0.3926	0	2	NEUT	1.88627
4	122000001	123000000	2	NEUT	-0.3985	0	2	NEUT	1.87056
4	123000001	124000000	2	NEUT	-0.3695	0	2	NEUT	1.94837
4	124000001	125000000	2	NEUT	-0.37	0	2	NEUT	1.94702
4	125000001	126000000	2	NEUT	-0.3373	0	2	NEUT	2.03662
4	126000001	127000000	2	NEUT	-0.3231	0	2	NEUT	2.07617
4	127000001	128000000	2	NEUT	-0.3976	0	2	NEUT	1.87296
4	128000001	129000000	2	NEUT	-0.3796	0	2	NEUT	1.9211
4	129000001	130000000	2	NEUT	-0.3303	0	2	NEUT	2.05607
4	130000001	131000000	2	NEUT	-0.3493	0	2	NEUT	2.00351
4	133000001	134000000	2	NEUT	-0.3077	0	2	NEUT	2.1195
4	134000001	135000000	2	NEUT	-0.2554	0	2	NEUT	2.27016
4	135000001	136000000	2	NEUT	-0.3106	0	2	NEUT	2.11131
4	136000001	137000000	2	NEUT	-0.3128	0	2	NEUT	2.1051
4	137000001	138000000	2	NEUT	-0.277	0	2	NEUT	2.20728
4	138000001	139000000	2	NEUT	-0.3687	0	2	NEUT	1.95054
4	139000001	140000000	2	NEUT	-0.3077	0	2	NEUT	2.1195
4	140000001	141000000	2	NEUT	-0.3137	0	2	NEUT	2.10257
4	141000001	142000000	2	NEUT	-0.3928	0	2	NEUT	1.88573
4	142000001	143000000	2	NEUT	-0.3964	0	2	NEUT	1.87615
4	145000001	146000000	2	NEUT	-0.4144	0	2	NEUT	1.82856
4	146000001	147000000	2	NEUT	-0.4185	0	2	NEUT	1.81781
4	147000001	148000000	2	NEUT	-0.408	0	2	NEUT	1.84541
4	148000001	149000000	3	GAIN	-0.0997	0	3	GAIN	2.75242
4	149000001	150000000	3	GAIN	-0.0291	0	3	GAIN	2.98885
4	150000001	151000000	3	GAIN	-0.0662	0	3	GAIN	2.86316
4	151000001	152000000	3	GAIN	0.0262	0	3	GAIN	3.18228
4	152000001	153000000	3	GAIN	0.0183	0	3	GAIN	3.15419
4	153000001	154000000	3	GAIN	0.072	0	3	GAIN	3.3482
4	154000001	155000000	3	GAIN	-0.0354	0	3	GAIN	2.96727
4	155000001	156000000	3	GAIN	-0.0702	0	3	GAIN	2.84981
4	156000001	157000000	3	GAIN	-0.0007	0	3	GAIN	3.08726
4	157000001	158000000	3	GAIN	-0.0195	0	3	GAIN	3.0219
4	158000001	159000000	3	GAIN	-0.0934	0	3	GAIN	2.77305
4	159000001	160000000	3	GAIN	-0.0887	0	3	GAIN	2.7885
4	160000001	161000000	3	GAIN	-0.0538	0	3	GAIN	2.90481
4	161000001	162000000	3	GAIN	0.0545	0	3	GAIN	3.28418
4	162000001	163000000	3	GAIN	-0.0119	0	3	GAIN	3.04822
4	163000001	164000000	3	GAIN	-0.0781	0	3	GAIN	2.82353
4	164000001	165000000	3	GAIN	-0.1077	0	3	GAIN	2.72635
4	165000001	166000000	3	GAIN	-0.1071	0	3	GAIN	2.7283
4	166000001	167000000	3	GAIN	-0.0163	0	3	GAIN	3.03296
4	167000001	168000000	3	GAIN	0.0162	0	3	GAIN	3.14675
4	168000001	169000000	3	GAIN	-0.0343	0	3	GAIN	2.97103
4	169000001	170000000	3	GAIN	-0.0374	0	3	GAIN	2.96045
4	170000001	171000000	3	GAIN	-0.0535	0	3	GAIN	2.90582
4	171000001	172000000	3	GAIN	0.0161	0	3	GAIN	3.1464
4	172000001	173000000	3	GAIN	-0.0701	0	3	GAIN	2.85014
4	173000001	174000000	3	GAIN	-0.1121	0	3	GAIN	2.71208
4	174000001	175000000	3	GAIN	-0.1426	0	3	GAIN	2.61431
4	175000001	176000000	2	NEUT	-0.3786	0	2	NEUT	1.92379
4	176000001	177000000	2	NEUT	-0.3962	0	2	NEUT	1.87668
4	177000001	178000000	2	NEUT	-0.421	0	2	NEUT	1.81126
4	178000001	179000000	2	NEUT	-0.3095	0	2	NEUT	2.11441
4	179000001	180000000	2	NEUT	-0.344	0	2	NEUT	2.0181
4	180000001	181000000	2	NEUT	-0.3689	0	2	NEUT	1.95
4	181000001	182000000	2	NEUT	-0.4216	0	2	NEUT	1.80969
4	182000001	183000000	2	NEUT	-0.3354	0	2	NEUT	2.04189
4	183000001	184000000	2	NEUT	-0.3147	0	2	NEUT	2.09975
4	184000001	185000000	2	NEUT	-0.2691	0	2	NEUT	2.23017
4	185000001	186000000	2	NEUT	-0.2694	0	2	NEUT	2.2293
4	186000001	187000000	2	NEUT	-0.379	0	2	NEUT	1.92271
4	187000001	188000000	2	NEUT	-0.3104	0	2	NEUT	2.11187
4	188000001	189000000	2	NEUT	-0.3261	0	2	NEUT	2.06778
5	1000001	2000000	4	AMP	-0.027	0	4	AMP	2.99606
5	2000001	3000000	4	AMP	0.2467	0	4	AMP	4.03173
5	3000001	4000000	4	AMP	0.2383	0	4	AMP	3.99694
5	4000001	5000000	4	AMP	0.2453	0	4	AMP	4.02592
5	5000001	6000000	4	AMP	0.2615	0	4	AMP	4.09353
5	6000001	7000000	4	AMP	0.2992	0	4	AMP	4.25384
5	7000001	8000000	4	AMP	0.2634	0	4	AMP	4.10151
5	8000001	9000000	4	AMP	0.1628	0	4	AMP	3.69313
5	9000001	10000000	4	AMP	0.2487	0	4	AMP	4.04004
5	10000001	11000000	4	AMP	0.2904	0	4	AMP	4.21605
5	11000001	12000000	4	AMP	0.1939	0	4	AMP	3.81635
5	12000001	13000000	4	AMP	0.2611	0	4	AMP	4.09185
5	13000001	14000000	4	AMP	0.2124	0	4	AMP	3.89092
5	14000001	15000000	4	AMP	0.3242	0	4	AMP	4.36249
5	15000001	16000000	4	AMP	0.2133	0	4	AMP	3.89457
5	16000001	17000000	4	AMP	0.2474	0	4	AMP	4.03464
5	18000001	19000000	4	AMP	0.217	0	4	AMP	3.90961
5	19000001	20000000	4	AMP	0.2676	0	4	AMP	4.11919
5	22000001	23000000	4	AMP	0.1913	0	4	AMP	3.80595
5	23000001	24000000	4	AMP	0.272	0	4	AMP	4.13776
5	24000001	25000000	4	AMP	0.2803	0	4	AMP	4.17295
5	25000001	26000000	4	AMP	0.2335	0	4	AMP	3.97714
5	26000001	27000000	4	AMP	0.1821	0	4	AMP	3.76928
5	27000001	28000000	4	AMP	0.2412	0	4	AMP	4.00892
5	28000001	29000000	4	AMP	0.2268	0	4	AMP	3.94963
5	29000001	30000000	4	AMP	0.2283	0	4	AMP	3.95578
5	30000001	31000000	4	AMP	0.2235	0	4	AMP	3.93612
5	31000001	32000000	4	AMP	0.3324	0	4	AMP	4.39854
5	32000001	33000000	4	AMP	0.2782	0	4	AMP	4.16403
5	33000001	34000000	4	AMP	0.1713	0	4	AMP	3.72654
5	35000001	36000000	4	AMP	0.2214	0	4	AMP	3.92754
5	36000001	37000000	4	AMP	0.2066	0	4	AMP	3.86744
5	37000001	38000000	4	AMP	0.2154	0	4	AMP	3.9031
5	38000001	39000000	4	AMP	0.3066	0	4	AMP	4.28581
5	39000001	40000000	4	AMP	0.1712	0	4	AMP	3.72615
5	40000001	41000000	4	AMP	0.1536	0	4	AMP	3.65718
5	41000001	42000000	4	AMP	0.1637	0	4	AMP	3.69666
5	42000001	43000000	4	AMP	0.3068	0	4	AMP	4.28667
5	43000001	44000000	4	AMP	0.5268	0	4	AMP	5.31597
5	44000001	45000000	4	AMP	0.2329	0	4	AMP	3.97467
5	52000001	53000000	4	AMP	0.1253	0	4	AMP	3.54804
5	53000001	54000000	4	AMP	0.0108	0	4	AMP	3.12767
5	54000001	55000000	2	NEUT	-0.2864	0	2	NEUT	2.1802
5	55000001	56000000	2	NEUT	-0.275	0	2	NEUT	2.21306
5	56000001	57000000	2	NEUT	-0.3238	0	2	NEUT	2.07421
5	57000001	58000000	2	NEUT	-0.4112	0	2	NEUT	1.83698
5	58000001	59000000	2	NEUT	-0.4616	0	2	NEUT	1.70657
5	59000001	60000000	2	NEUT	-0.3855	0	2	NEUT	1.90525
5	60000001	61000000	2	NEUT	-0.3756	0	2	NEUT	1.93188
5	61000001	62000000	2	NEUT	-0.3639	0	2	NEUT	1.96358
5	62000001	63000000	2	NEUT	-0.4186	0	2	NEUT	1.81754
5	63000001	64000000	2	NEUT	-0.3577	0	2	NEUT	1.98049
5	64000001	65000000	2	NEUT	-0.4149	0	2	NEUT	1.82725
5	65000001	66000000	2	NEUT	-0.4627	0	2	NEUT	1.70377
5	66000001	67000000	2	NEUT	-0.3806	0	2	NEUT	1.91841
5	67000001	68000000	2	NEUT	-0.3787	0	2	NEUT	1.92352
5	72000001	73000000	2	NEUT	-0.2523	0	2	NEUT	2.27927
5	73000001	74000000	2	NEUT	-0.3423	0	2	NEUT	2.02279
5	74000001	75000000	2	NEUT	-0.3062	0	2	NEUT	2.12375
5	75000001	76000000	2	NEUT	-0.444	0	2	NEUT	1.75159
5	76000001	77000000	2	NEUT	-0.3797	0	2	NEUT	1.92083
5	77000001	78000000	2	NEUT	-0.37	0	2	NEUT	1.94702
5	78000001	79000000	2	NEUT	-0.3641	0	2	NEUT	1.96304
5	79000001	80000000	2	NEUT	-0.3547	0	2	NEUT	1.98869
5	80000001	81000000	2	NEUT	-0.3409	0	2	NEUT	2.02666
5	81000001	82000000	2	NEUT	-0.3702	0	2	NEUT	1.94648
5	82000001	83000000	2	NEUT	-0.4371	0	2	NEUT	1.76939
5	83000001	84000000	2	NEUT	-0.3493	0	2	NEUT	2.00351
5	84000001	85000000	2	NEUT	-0.3172	0	2	NEUT	2.09272
5	85000001	86000000	2	NEUT	-0.3224	0	2	NEUT	2.07813
5	86000001	87000000	2	NEUT	-0.3911	0	2	NEUT	1.89027
5	87000001	88000000	2	NEUT	-0.3554	0	2	NEUT	1.98678
5	88000001	89000000	2	NEUT	-0.4218	0	2	NEUT	1.80917
5	89000001	90000000	2	NEUT	-0.329	0	2	NEUT	2.05969
5	90000001	91000000	2	NEUT	-0.4132	0	2	NEUT	1.83172
5	91000001	92000000	2	NEUT	NA	0	2	NEUT	NA
5	92000001	93000000	2	NEUT	-0.2891	0	2	NEUT	2.17246
5	93000001	94000000	2	NEUT	-0.4628	0	2	NEUT	1.70352
5	94000001	95000000	2	NEUT	-0.3654	0	2	NEUT	1.9595
5	95000001	96000000	2	NEUT	-0.3457	0	2	NEUT	2.01341
5	96000001	97000000	2	NEUT	-0.3107	0	2	NEUT	2.11103
5	97000001	98000000	2	NEUT	-0.3795	0	2	NEUT	1.92137
5	98000001	99000000	2	NEUT	-0.3794	0	2	NEUT	1.92164
5	101000001	102000000	2	NEUT	-0.3614	0	2	NEUT	1.97039
5	102000001	103000000	2	NEUT	-0.3782	0	2	NEUT	1.92487
5	103000001	104000000	2	NEUT	-0.3373	0	2	NEUT	2.03662
5	104000001	105000000	2	NEUT	-0.3538	0	2	NEUT	1.99116
5	105000001	106000000	2	NEUT	-0.1994	0	2	NEUT	2.43765
5	106000001	107000000	2	NEUT	-0.3932	0	2	NEUT	1.88467
5	107000001	108000000	2	NEUT	-0.3667	0	2	NEUT	1.95597
5	108000001	109000000	2	NEUT	-0.4059	0	2	NEUT	1.85096
5	109000001	110000000	2	NEUT	-0.4577	0	2	NEUT	1.7165
5	110000001	111000000	2	NEUT	-0.4131	0	2	NEUT	1.83198
5	111000001	112000000	2	NEUT	-0.4682	0	2	NEUT	1.68983
5	112000001	113000000	2	NEUT	-0.3598	0	2	NEUT	1.97475
5	113000001	114000000	2	NEUT	-0.3153	0	2	NEUT	2.09806
5	114000001	115000000	2	NEUT	-0.3683	0	2	NEUT	1.95163
5	115000001	116000000	2	NEUT	-0.2501	0	2	NEUT	2.28574
5	116000001	117000000	2	NEUT	-0.3124	0	2	NEUT	2.10623
5	117000001	118000000	2	NEUT	-0.3506	0	2	NEUT	1.99993
5	118000001	119000000	2	NEUT	-0.348	0	2	NEUT	2.00708
5	119000001	120000000	2	NEUT	-0.4076	0	2	NEUT	1.84647
5	120000001	121000000	2	NEUT	-0.3749	0	2	NEUT	1.93377
5	121000001	122000000	2	NEUT	-0.3411	0	2	NEUT	2.02611
5	122000001	123000000	2	NEUT	-0.2896	0	2	NEUT	2.17103
5	123000001	124000000	4	AMP	0.1897	0	4	AMP	3.79955
5	124000001	125000000	4	AMP	0.2556	0	4	AMP	4.06882
5	125000001	126000000	4	AMP	0.2952	0	4	AMP	4.23664
5	126000001	127000000	4	AMP	0.2393	0	4	AMP	4.00107
5	127000001	128000000	4	AMP	0.2535	0	4	AMP	4.06005
5	128000001	129000000	4	AMP	0.194	0	4	AMP	3.81675
5	129000001	130000000	4	AMP	0.199	0	4	AMP	3.83681
5	130000001	131000000	4	AMP	0.2075	0	4	AMP	3.87108
5	131000001	132000000	4	AMP	0.2555	0	4	AMP	4.0684
5	132000001	133000000	4	AMP	0.2814	0	4	AMP	4.17763
5	133000001	134000000	4	AMP	0.3229	0	4	AMP	4.35679
5	134000001	135000000	4	AMP	0.2285	0	4	AMP	3.9566
5	135000001	136000000	4	AMP	0.2018	0	4	AMP	3.84808
5	136000001	137000000	3	GAIN	-0.0162	0	3	GAIN	3.03331
5	137000001	138000000	3	GAIN	0.0907	0	3	GAIN	3.41747
5	138000001	139000000	3	GAIN	NA	0	3	GAIN	NA
5	139000001	140000000	3	GAIN	NA	0	3	GAIN	NA
5	140000001	141000000	3	GAIN	0.1246	0	3	GAIN	3.54537
5	141000001	142000000	3	GAIN	-0.0091	0	3	GAIN	3.05795
5	142000001	143000000	3	GAIN	0.0339	0	3	GAIN	3.20981
5	143000001	144000000	3	GAIN	-0.0038	0	3	GAIN	3.07643
5	144000001	145000000	3	GAIN	-0.0526	0	3	GAIN	2.90886
5	145000001	146000000	3	GAIN	-0.0806	0	3	GAIN	2.81525
5	146000001	147000000	3	GAIN	-0.0451	0	3	GAIN	2.93425
5	147000001	148000000	3	GAIN	-0.0859	0	3	GAIN	2.79773
5	148000001	149000000	3	GAIN	0.0359	0	3	GAIN	3.21699
5	149000001	150000000	4	AMP	0.2796	0	4	AMP	4.16997
5	150000001	151000000	4	AMP	0.3439	0	4	AMP	4.44944
5	151000001	152000000	4	AMP	0.3178	0	4	AMP	4.3345
5	152000001	153000000	4	AMP	0.1765	0	4	AMP	3.74708
5	153000001	154000000	4	AMP	0.212	0	4	AMP	3.8893
5	154000001	155000000	4	AMP	0.3352	0	4	AMP	4.41089
5	155000001	156000000	4	AMP	NA	0	4	AMP	NA
5	156000001	157000000	4	AMP	0.212	0	4	AMP	3.8893
5	157000001	158000000	4	AMP	0.2317	0	4	AMP	3.96974
5	158000001	159000000	4	AMP	0.2771	0	4	AMP	4.15936
5	159000001	160000000	4	AMP	0.2976	0	4	AMP	4.24696
5	160000001	161000000	4	AMP	0.2277	0	4	AMP	3.95332
5	161000001	162000000	4	AMP	0.2457	0	4	AMP	4.02758
5	162000001	163000000	4	AMP	0.195	0	4	AMP	3.82076
5	163000001	164000000	4	AMP	0.1425	0	4	AMP	3.61412
5	164000001	165000000	4	AMP	0.2334	0	4	AMP	3.97673
5	165000001	166000000	4	AMP	0.1416	0	4	AMP	3.61064
5	166000001	167000000	3	GAIN	-0.0277	0	3	GAIN	2.99365
5	167000001	168000000	3	GAIN	-0.0888	0	3	GAIN	2.78817
5	168000001	169000000	3	GAIN	-0.0663	0	3	GAIN	2.86283
5	169000001	170000000	3	GAIN	-0.0127	0	3	GAIN	3.04544
5	170000001	171000000	3	GAIN	0.0109	0	3	GAIN	3.12802
5	171000001	172000000	3	GAIN	-0.0118	0	3	GAIN	3.04857
5	172000001	173000000	3	GAIN	0.0378	0	3	GAIN	3.22381
5	173000001	174000000	3	GAIN	-0.0253	0	3	GAIN	3.0019
5	174000001	175000000	3	GAIN	-0.0204	0	3	GAIN	3.01879
5	178000001	179000000	5	HLAMP	0.6775	0	6	HLAMP	6.11729
5	179000001	180000000	5	HLAMP	0.672	0	6	HLAMP	6.08655
6	1000001	2000000	4	AMP	0.2583	0	4	AMP	4.08011
6	2000001	3000000	4	AMP	0.2632	0	4	AMP	4.10067
6	3000001	4000000	4	AMP	0.2973	0	4	AMP	4.24566
6	4000001	5000000	4	AMP	0.2115	0	4	AMP	3.88727
6	5000001	6000000	4	AMP	0.2323	0	4	AMP	3.97221
6	6000001	7000000	4	AMP	0.2441	0	4	AMP	4.02094
6	7000001	8000000	4	AMP	0.3108	0	4	AMP	4.30402
6	8000001	9000000	4	AMP	0.1482	0	4	AMP	3.63619
6	9000001	10000000	4	AMP	0.167	0	4	AMP	3.70962
6	10000001	11000000	4	AMP	0.2994	0	4	AMP	4.25471
6	11000001	12000000	4	AMP	0.3073	0	4	AMP	4.28884
6	12000001	13000000	4	AMP	0.2337	0	4	AMP	3.97797
6	13000001	14000000	4	AMP	0.3299	0	4	AMP	4.38752
6	14000001	15000000	4	AMP	0.2778	0	4	AMP	4.16233
6	15000001	16000000	4	AMP	0.2885	0	4	AMP	4.20792
6	16000001	17000000	4	AMP	0.2652	0	4	AMP	4.10908
6	17000001	18000000	4	AMP	0.2466	0	4	AMP	4.03131
6	18000001	19000000	4	AMP	0.3195	0	4	AMP	4.34192
6	19000001	20000000	4	AMP	0.196	0	4	AMP	3.82477
6	20000001	21000000	4	AMP	0.3381	0	4	AMP	4.42371
6	21000001	22000000	4	AMP	0.2938	0	4	AMP	4.23062
6	22000001	23000000	4	AMP	0.1866	0	4	AMP	3.78719
6	23000001	24000000	4	AMP	0.2034	0	4	AMP	3.85452
6	24000001	25000000	4	AMP	0.315	0	4	AMP	4.32229
6	25000001	26000000	4	AMP	0.2306	0	4	AMP	3.96522
6	27000001	28000000	4	AMP	0.259	0	4	AMP	4.08305
6	28000001	29000000	4	AMP	0.239	0	4	AMP	3.99983
6	29000001	30000000	4	AMP	0.2639	0	4	AMP	4.10361
6	30000001	31000000	4	AMP	0.3252	0	4	AMP	4.36687
6	31000001	32000000	4	AMP	0.414	0	4	AMP	4.76864
6	32000001	33000000	4	AMP	0.2757	0	4	AMP	4.15342
6	33000001	34000000	3	GAIN	-0.3303	1	3	GAIN	2.05778
6	34000001	35000000	3	GAIN	-0.0536	1	3	GAIN	2.93316
6	35000001	36000000	3	GAIN	0.0262	1	3	GAIN	3.21842
6	36000001	37000000	3	GAIN	0.0725	1	3	GAIN	3.3913
6	37000001	38000000	3	GAIN	0.0523	1	3	GAIN	3.31519
6	38000001	39000000	3	GAIN	-0.1288	1	3	GAIN	2.67841
6	39000001	40000000	2	NEUT	-0.284	0	2	NEUT	2.1871
6	40000001	41000000	2	NEUT	-0.3842	0	2	NEUT	1.90874
6	41000001	42000000	2	NEUT	-0.2759	0	2	NEUT	2.21046
6	42000001	43000000	2	NEUT	-0.2902	0	2	NEUT	2.16931
6	43000001	44000000	2	NEUT	-0.3358	0	2	NEUT	2.04078
6	44000001	45000000	2	NEUT	-0.3523	0	2	NEUT	1.99527
6	45000001	46000000	2	NEUT	-0.3864	0	2	NEUT	1.90284
6	46000001	47000000	2	NEUT	-0.4065	0	2	NEUT	1.84937
6	47000001	48000000	2	NEUT	-0.3946	0	2	NEUT	1.88094
6	48000001	49000000	2	NEUT	-0.3567	0	2	NEUT	1.98322
6	49000001	50000000	2	NEUT	-0.3548	0	2	NEUT	1.98842
6	50000001	51000000	2	NEUT	-0.3748	0	2	NEUT	1.93404
6	51000001	52000000	2	NEUT	-0.4397	0	2	NEUT	1.76267
6	52000001	53000000	2	NEUT	-0.3448	0	2	NEUT	2.01589
6	53000001	54000000	2	NEUT	-0.3122	0	2	NEUT	2.10679
6	54000001	55000000	2	NEUT	-0.3719	0	2	NEUT	1.94188
6	55000001	56000000	2	NEUT	-0.3357	0	2	NEUT	2.04106
6	56000001	57000000	2	NEUT	-0.3966	0	2	NEUT	1.87561
6	63000001	64000000	2	NEUT	-0.4539	0	2	NEUT	1.7262
6	64000001	65000000	2	NEUT	-0.3477	0	2	NEUT	2.00791
6	65000001	66000000	2	NEUT	-0.353	0	2	NEUT	1.99335
6	66000001	67000000	2	NEUT	-0.3308	0	2	NEUT	2.05468
6	67000001	68000000	2	NEUT	-0.2859	0	2	NEUT	2.18164
6	68000001	69000000	2	NEUT	-0.3589	0	2	NEUT	1.97721
6	69000001	70000000	2	NEUT	-0.3928	0	2	NEUT	1.88573
6	70000001	71000000	2	NEUT	-0.447	0	2	NEUT	1.74388
6	71000001	72000000	2	NEUT	-0.3908	0	2	NEUT	1.89107
6	72000001	73000000	2	NEUT	-0.4227	0	2	NEUT	1.80682
6	73000001	74000000	2	NEUT	-0.4253	0	2	NEUT	1.80003
6	74000001	75000000	2	NEUT	-0.3437	0	2	NEUT	2.01893
6	75000001	76000000	2	NEUT	-0.4574	0	2	NEUT	1.71726
6	76000001	77000000	2	NEUT	-0.3649	0	2	NEUT	1.96086
6	77000001	78000000	2	NEUT	-0.3437	0	2	NEUT	2.01893
6	78000001	79000000	2	NEUT	-0.4246	0	2	NEUT	1.80186
6	79000001	80000000	2	NEUT	-0.3582	0	2	NEUT	1.97912
6	80000001	81000000	2	NEUT	-0.3783	0	2	NEUT	1.9246
6	81000001	82000000	2	NEUT	-0.357	0	2	NEUT	1.9824
6	82000001	83000000	2	NEUT	-0.4428	0	2	NEUT	1.75468
6	83000001	84000000	2	NEUT	-0.4189	0	2	NEUT	1.81676
6	84000001	85000000	2	NEUT	-0.4119	0	2	NEUT	1.83514
6	85000001	86000000	2	NEUT	-0.3009	0	2	NEUT	2.13878
6	87000001	88000000	2	NEUT	-0.3854	0	2	NEUT	1.90552
6	88000001	89000000	2	NEUT	-0.3875	0	2	NEUT	1.89989
6	89000001	90000000	2	NEUT	-0.3693	0	2	NEUT	1.94892
6	90000001	91000000	2	NEUT	-0.2684	0	2	NEUT	2.2322
6	91000001	92000000	2	NEUT	-0.3031	0	2	NEUT	2.13254
6	92000001	93000000	2	NEUT	-0.2873	0	2	NEUT	2.17762
6	93000001	94000000	2	NEUT	-0.2832	0	2	NEUT	2.1894
6	94000001	95000000	2	NEUT	-0.3124	0	2	NEUT	2.10623
6	96000001	97000000	2	NEUT	-0.3463	0	2	NEUT	2.01176
6	97000001	98000000	2	NEUT	-0.3114	0	2	NEUT	2.10905
6	98000001	99000000	2	NEUT	-0.3977	0	2	NEUT	1.87269
6	99000001	100000000	2	NEUT	-0.4222	0	2	NEUT	1.80813
6	100000001	101000000	2	NEUT	-0.3879	0	2	NEUT	1.89882
6	101000001	102000000	2	NEUT	-0.3085	0	2	NEUT	2.11724
6	102000001	103000000	2	NEUT	-0.3223	0	2	NEUT	2.07841
6	103000001	104000000	2	NEUT	-0.3277	0	2	NEUT	2.06332
6	104000001	105000000	2	NEUT	-0.3872	0	2	NEUT	1.9007
6	105000001	106000000	5	HLAMP	0.1979	0	4	AMP	3.83239
6	106000001	107000000	5	HLAMP	0.7028	0	6	HLAMP	6.26022
6	107000001	108000000	5	HLAMP	0.6884	0	6	HLAMP	6.17856
6	108000001	109000000	5	HLAMP	0.6522	0	6	HLAMP	5.97685
6	109000001	110000000	5	HLAMP	0.7199	0	6	HLAMP	6.35825
6	110000001	111000000	5	HLAMP	0.6659	0	6	HLAMP	6.05259
6	111000001	112000000	5	HLAMP	0.7739	0	7	HLAMP	6.67556
6	112000001	113000000	5	HLAMP	0.5811	0	6	HLAMP	5.5951
6	113000001	114000000	5	HLAMP	0.6209	0	6	HLAMP	5.80647
6	114000001	115000000	5	HLAMP	0.6387	0	6	HLAMP	5.90291
6	115000001	116000000	5	HLAMP	NA	0	NA	NA	NA
6	116000001	117000000	5	HLAMP	0.6181	0	6	HLAMP	5.79141
6	117000001	118000000	5	HLAMP	0.5667	0	6	HLAMP	5.52005
6	118000001	119000000	5	HLAMP	0.682	0	6	HLAMP	6.14253
6	119000001	120000000	5	HLAMP	0.9092	0	8	HLAMP	7.52477
6	120000001	121000000	5	HLAMP	0.8206	0	7	HLAMP	6.95972
6	121000001	122000000	5	HLAMP	0.7072	0	6	HLAMP	6.28533
6	122000001	123000000	5	HLAMP	0.7686	0	7	HLAMP	6.64389
6	123000001	124000000	5	HLAMP	0.8338	0	7	HLAMP	7.04172
6	124000001	125000000	5	HLAMP	0.6934	0	6	HLAMP	6.20682
6	125000001	126000000	5	HLAMP	0.7891	0	7	HLAMP	6.76704
6	126000001	127000000	5	HLAMP	0.8267	0	7	HLAMP	6.99752
6	127000001	128000000	5	HLAMP	0.7921	0	7	HLAMP	6.78521
6	128000001	129000000	5	HLAMP	0.8784	0	7	HLAMP	7.3244
6	129000001	130000000	5	HLAMP	0.7953	0	7	HLAMP	6.80463
6	130000001	131000000	5	HLAMP	0.8187	0	7	HLAMP	6.94798
6	131000001	132000000	5	HLAMP	0.7841	0	7	HLAMP	6.73684
6	132000001	133000000	5	HLAMP	0.8379	0	7	HLAMP	7.06734
6	133000001	134000000	5	HLAMP	0.817	0	7	HLAMP	6.93748
6	134000001	135000000	5	HLAMP	0.7783	0	7	HLAMP	6.70194
6	135000001	136000000	5	HLAMP	0.5472	0	5	HLAMP	5.41961
6	136000001	137000000	5	HLAMP	0.2603	0	4	AMP	4.08849
6	137000001	138000000	3	GAIN	0.0355	1	3	GAIN	3.2527
6	138000001	139000000	3	GAIN	0.015	1	3	GAIN	3.17742
6	139000001	140000000	3	GAIN	0.0715	1	3	GAIN	3.38751
6	140000001	141000000	3	GAIN	0.0347	1	3	GAIN	3.24974
6	141000001	142000000	1	HETD	-0.7422	1	1	HETD	1.02943
6	142000001	143000000	1	HETD	-0.795	1	1	HETD	0.917595
6	143000001	144000000	1	HETD	-0.7459	1	1	HETD	1.02146
6	144000001	145000000	1	HETD	-0.7443	1	1	HETD	1.02491
6	145000001	146000000	1	HETD	-0.8079	1	1	HETD	0.890887
6	146000001	147000000	1	HETD	-0.8396	1	1	HETD	0.826263
6	147000001	148000000	1	HETD	-0.7891	1	1	HETD	0.92989
6	148000001	149000000	1	HETD	-0.7551	1	1	HETD	1.00173
6	149000001	150000000	1	HETD	-0.7493	1	1	HETD	1.01415
6	150000001	151000000	1	HETD	-0.7602	1	1	HETD	0.990845
6	151000001	152000000	1	HETD	-0.7378	1	1	HETD	1.03894
6	152000001	153000000	1	HETD	-0.4409	1	1	HETD	1.75223
6	153000001	154000000	3	GAIN	0.1242	1	3	GAIN	3.59102
6	154000001	155000000	3	GAIN	0.3101	1	3	GAIN	4.37131
6	155000001	156000000	3	GAIN	0.2512	1	3	GAIN	4.11312
6	156000001	157000000	3	GAIN	-0.0517	1	3	GAIN	2.93977
6	158000001	159000000	1	HETD	-0.7644	1	1	HETD	0.981911
6	159000001	160000000	1	HETD	-0.7594	1	1	HETD	0.99255
6	160000001	161000000	1	HETD	-0.737	1	1	HETD	1.04067
6	161000001	162000000	1	HETD	-0.7347	1	1	HETD	1.04565
6	162000001	163000000	1	HETD	-0.7788	1	1	HETD	0.951474
6	163000001	164000000	1	HETD	-0.7407	1	1	HETD	1.03267
6	164000001	165000000	1	HETD	-0.8163	1	1	HETD	0.873624
6	165000001	166000000	1	HETD	-0.6963	1	1	HETD	1.13004
6	166000001	167000000	1	HETD	-0.7274	1	1	HETD	1.06152
6	168000001	169000000	1	HETD	NA	1	1	HETD	NA
6	169000001	170000000	1	HETD	-0.7243	1	1	HETD	1.06829
7	1000001	2000000	3	GAIN	-0.3462	1	3	GAIN	2.0124
7	2000001	3000000	3	GAIN	-0.1729	1	3	GAIN	2.53508
7	3000001	4000000	3	GAIN	-0.0569	1	3	GAIN	2.9217
7	4000001	5000000	3	GAIN	-0.0313	1	3	GAIN	3.01129
7	7000001	8000000	3	GAIN	-0.0564	1	3	GAIN	2.92344
7	8000001	9000000	3	GAIN	0.3275	1	3	GAIN	4.44962
7	9000001	10000000	3	GAIN	-0.0073	1	3	GAIN	3.09674
7	10000001	11000000	3	GAIN	-0.0861	1	3	GAIN	2.82143
7	11000001	12000000	3	GAIN	0.0441	1	3	GAIN	3.2846
7	12000001	13000000	3	GAIN	-0.048	1	3	GAIN	2.95267
7	13000001	14000000	3	GAIN	-0.2106	1	3	GAIN	2.41597
7	14000001	15000000	2	NEUT	-0.3374	0	2	NEUT	2.03635
7	15000001	16000000	2	NEUT	-0.3948	0	2	NEUT	1.8804
7	16000001	17000000	2	NEUT	-0.3579	0	2	NEUT	1.97994
7	17000001	18000000	2	NEUT	-0.3796	0	2	NEUT	1.9211
7	18000001	19000000	2	NEUT	-0.3189	0	2	NEUT	2.08794
7	19000001	20000000	2	NEUT	-0.3599	0	2	NEUT	1.97448
7	20000001	21000000	2	NEUT	-0.3793	0	2	NEUT	1.92191
7	21000001	22000000	2	NEUT	-0.3812	0	2	NEUT	1.91679
7	22000001	23000000	2	NEUT	-0.314	0	2	NEUT	2.10172
7	23000001	24000000	2	NEUT	-0.1346	0	2	NEUT	2.63975
7	24000001	25000000	2	NEUT	-0.3876	0	2	NEUT	1.89963
7	25000001	26000000	2	NEUT	-0.3202	0	2	NEUT	2.0843
7	26000001	27000000	2	NEUT	-0.3466	0	2	NEUT	2.01093
7	27000001	28000000	2	NEUT	-0.3241	0	2	NEUT	2.07337
7	28000001	29000000	2	NEUT	-0.3304	0	2	NEUT	2.05579
7	29000001	30000000	2	NEUT	-0.3789	0	2	NEUT	1.92298
7	30000001	31000000	2	NEUT	-0.2998	0	2	NEUT	2.14191
7	31000001	32000000	2	NEUT	-0.2826	0	2	NEUT	2.19113
7	33000001	34000000	2	NEUT	-0.3699	0	2	NEUT	1.94729
7	34000001	35000000	2	NEUT	-0.3792	0	2	NEUT	1.92217
7	36000001	37000000	2	NEUT	-0.2928	0	2	NEUT	2.16187
7	37000001	38000000	2	NEUT	-0.3727	0	2	NEUT	1.93971
7	38000001	39000000	2	NEUT	-0.3999	0	2	NEUT	1.86685
7	39000001	40000000	2	NEUT	-0.4112	0	2	NEUT	1.83698
7	40000001	41000000	2	NEUT	-0.405	0	2	NEUT	1.85334
7	41000001	42000000	4	AMP	0.1373	0	4	AMP	3.59406
7	42000001	43000000	4	AMP	0.2432	0	4	AMP	4.01721
7	43000001	44000000	4	AMP	0.1898	0	4	AMP	3.79995
7	44000001	45000000	4	AMP	0.4083	0	4	AMP	4.7421
7	46000001	47000000	4	AMP	0.222	0	4	AMP	3.92999
7	47000001	48000000	4	AMP	0.2639	0	4	AMP	4.10361
7	48000001	49000000	4	AMP	0.1933	0	4	AMP	3.81395
7	49000001	50000000	4	AMP	0.1912	0	4	AMP	3.80555
7	50000001	51000000	4	AMP	NA	0	4	AMP	NA
7	51000001	52000000	4	AMP	0.2232	0	4	AMP	3.9349
7	52000001	53000000	4	AMP	0.2311	0	4	AMP	3.96727
7	53000001	54000000	4	AMP	0.203	0	4	AMP	3.85291
7	54000001	55000000	4	AMP	0.1825	0	4	AMP	3.77087
7	55000001	56000000	4	AMP	0.2401	0	4	AMP	4.00437
7	68000001	69000000	3	GAIN	-0.0228	0	3	GAIN	3.01051
7	69000001	70000000	3	GAIN	-0.0122	0	3	GAIN	3.04718
7	70000001	71000000	3	GAIN	0.0195	0	3	GAIN	3.15845
7	71000001	72000000	3	GAIN	-0.0381	0	3	GAIN	2.95806
7	78000001	79000000	3	GAIN	-0.0776	0	3	GAIN	2.82519
7	79000001	80000000	3	GAIN	-0.0159	0	3	GAIN	3.03435
7	80000001	81000000	3	GAIN	-0.0463	0	3	GAIN	2.93018
7	81000001	82000000	3	GAIN	0.0052	0	3	GAIN	3.10795
7	82000001	83000000	3	GAIN	-0.0247	0	3	GAIN	3.00397
7	83000001	84000000	3	GAIN	-0.0483	0	3	GAIN	2.9234
7	84000001	85000000	3	GAIN	-0.0477	0	3	GAIN	2.92543
7	85000001	86000000	3	GAIN	0.0844	0	3	GAIN	3.39404
7	86000001	87000000	3	GAIN	-0.0141	0	3	GAIN	3.04058
7	87000001	88000000	3	GAIN	-0.1499	0	3	GAIN	2.59121
7	88000001	89000000	3	GAIN	-0.0329	0	3	GAIN	2.97582
7	89000001	90000000	3	GAIN	-0.0774	0	3	GAIN	2.82585
7	90000001	91000000	3	GAIN	0.0777	0	3	GAIN	3.36922
7	91000001	92000000	4	AMP	0.2089	0	4	AMP	3.87674
7	92000001	93000000	4	AMP	0.2458	0	4	AMP	4.02799
7	93000001	94000000	4	AMP	0.2093	0	4	AMP	3.87836
7	94000001	95000000	4	AMP	0.2147	0	4	AMP	3.90026
7	95000001	96000000	4	AMP	0.2149	0	4	AMP	3.90107
7	96000001	97000000	4	AMP	0.2007	0	4	AMP	3.84365
7	98000001	99000000	4	AMP	0.2796	0	4	AMP	4.16997
7	99000001	100000000	4	AMP	0.2894	0	4	AMP	4.21177
7	101000001	102000000	4	AMP	0.1863	0	4	AMP	3.78599
7	104000001	105000000	4	AMP	0.2624	0	4	AMP	4.09731
7	105000001	106000000	4	AMP	0.2901	0	4	AMP	4.21476
7	106000001	107000000	4	AMP	0.3101	0	4	AMP	4.30098
7	107000001	108000000	4	AMP	0.2294	0	4	AMP	3.96029
7	108000001	109000000	4	AMP	0.2489	0	4	AMP	4.04088
7	109000001	110000000	4	AMP	0.2959	0	4	AMP	4.23964
7	110000001	111000000	4	AMP	0.1767	0	4	AMP	3.74787
7	111000001	112000000	4	AMP	0.1831	0	4	AMP	3.77326
7	112000001	113000000	4	AMP	0.2794	0	4	AMP	4.16912
7	113000001	114000000	4	AMP	0.2843	0	4	AMP	4.18998
7	114000001	115000000	4	AMP	0.245	0	4	AMP	4.02467
7	115000001	116000000	4	AMP	0.2589	0	4	AMP	4.08263
7	116000001	117000000	4	AMP	0.2064	0	4	AMP	3.86663
7	117000001	118000000	4	AMP	0.1759	0	4	AMP	3.74471
7	118000001	119000000	4	AMP	0.2433	0	4	AMP	4.01762
7	119000001	120000000	4	AMP	0.2698	0	4	AMP	4.12847
7	120000001	121000000	4	AMP	0.2419	0	4	AMP	4.01182
7	121000001	122000000	4	AMP	0.2248	0	4	AMP	3.94144
7	122000001	123000000	4	AMP	0.141	0	4	AMP	3.60833
7	123000001	124000000	4	AMP	0.1552	0	4	AMP	3.66342
7	124000001	125000000	4	AMP	0.1983	0	4	AMP	3.834
7	125000001	126000000	4	AMP	0.2772	0	4	AMP	4.15978
7	126000001	127000000	4	AMP	0.2217	0	4	AMP	3.92877
7	127000001	128000000	4	AMP	0.3468	0	4	AMP	4.46234
7	129000001	130000000	4	AMP	0.2908	0	4	AMP	4.21776
7	131000001	132000000	4	AMP	0.2623	0	4	AMP	4.09689
7	132000001	133000000	4	AMP	0.2057	0	4	AMP	3.8638
7	133000001	134000000	4	AMP	0.2196	0	4	AMP	3.9202
7	134000001	135000000	4	AMP	0.3231	0	4	AMP	4.35767
7	135000001	136000000	4	AMP	0.3019	0	4	AMP	4.26549
7	136000001	137000000	4	AMP	0.1974	0	4	AMP	3.83038
7	137000001	138000000	4	AMP	0.2228	0	4	AMP	3.93326
7	138000001	139000000	4	AMP	0.298	0	4	AMP	4.24868
7	139000001	140000000	4	AMP	NA	0	4	AMP	NA
7	140000001	141000000	4	AMP	0.2023	0	4	AMP	3.85009
7	141000001	142000000	2	NEUT	-0.339	0	2	NEUT	2.03192
7	145000001	146000000	2	NEUT	-0.4028	0	2	NEUT	1.85916
7	146000001	147000000	2	NEUT	-0.4084	0	2	NEUT	1.84436
7	147000001	148000000	2	NEUT	-0.4175	0	2	NEUT	1.82043
7	148000001	149000000	2	NEUT	-0.321	0	2	NEUT	2.08205
7	151000001	152000000	2	NEUT	-0.38	0	2	NEUT	1.92002
7	155000001	156000000	2	NEUT	-0.2978	0	2	NEUT	2.1476
7	156000001	157000000	2	NEUT	-0.3266	0	2	NEUT	2.06639
7	157000001	158000000	2	NEUT	-0.2975	0	2	NEUT	2.14846
7	158000001	159000000	2	NEUT	0.0404	0	2	NEUT	3.23316
8	1000001	2000000	3	GAIN	-0.0567	0	3	GAIN	2.89504
8	3000001	4000000	3	GAIN	-0.074	0	3	GAIN	2.83715
8	4000001	5000000	3	GAIN	-0.1081	0	3	GAIN	2.72505
8	5000001	6000000	3	GAIN	-0.1079	0	3	GAIN	2.7257
8	6000001	7000000	3	GAIN	-0.1013	0	3	GAIN	2.7472
8	9000001	10000000	3	GAIN	-0.0397	0	3	GAIN	2.95261
8	10000001	11000000	3	GAIN	-0.0405	0	3	GAIN	2.94988
8	11000001	12000000	3	GAIN	-0.0242	0	3	GAIN	3.00569
8	13000001	14000000	3	GAIN	-0.0777	0	3	GAIN	2.82486
8	14000001	15000000	3	GAIN	-0.0116	0	3	GAIN	3.04926
8	15000001	16000000	3	GAIN	-0.0151	0	3	GAIN	3.03712
8	16000001	17000000	3	GAIN	-0.0764	0	3	GAIN	2.82917
8	17000001	18000000	3	GAIN	0.0276	0	3	GAIN	3.18728
8	18000001	19000000	3	GAIN	-0.0051	0	3	GAIN	3.07189
8	19000001	20000000	2	NEUT	-0.2084	0	2	NEUT	2.4103
8	20000001	21000000	2	NEUT	-0.3715	0	2	NEUT	1.94296
8	21000001	22000000	2	NEUT	-0.3047	0	2	NEUT	2.128
8	22000001	23000000	2	NEUT	-0.3458	0	2	NEUT	2.01314
8	23000001	24000000	2	NEUT	-0.2952	0	2	NEUT	2.15502
8	24000001	25000000	2	NEUT	-0.3546	0	2	NEUT	1.98897
8	25000001	26000000	2	NEUT	-0.3484	0	2	NEUT	2.00598
8	26000001	27000000	2	NEUT	-0.3146	0	2	NEUT	2.10003
8	27000001	28000000	2	NEUT	-0.3094	0	2	NEUT	2.1147
8	28000001	29000000	2	NEUT	-0.2949	0	2	NEUT	2.15587
8	29000001	30000000	2	NEUT	-0.3297	0	2	NEUT	2.05774
8	30000001	31000000	4	AMP	0.0632	0	4	AMP	3.31591
8	31000001	32000000	4	AMP	0.201	0	4	AMP	3.84486
8	32000001	33000000	4	AMP	0.1944	0	4	AMP	3.81835
8	33000001	34000000	4	AMP	0.2688	0	4	AMP	4.12425
8	34000001	35000000	4	AMP	0.2094	0	4	AMP	3.87876
8	35000001	36000000	4	AMP	0.2398	0	4	AMP	4.00313
8	36000001	37000000	4	AMP	0.1938	0	4	AMP	3.81595
8	37000001	38000000	4	AMP	0.2853	0	4	AMP	4.19425
8	38000001	39000000	4	AMP	0.3368	0	4	AMP	4.41796
8	39000001	40000000	4	AMP	0.0325	0	4	AMP	3.2048
8	40000001	41000000	4	AMP	0.2641	0	4	AMP	4.10445
8	41000001	42000000	4	AMP	0.2848	0	4	AMP	4.19212
8	42000001	43000000	4	AMP	0.2933	0	4	AMP	4.22848
8	48000001	49000000	5	HLAMP	NA	0	NA	NA	NA
8	49000001	50000000	5	HLAMP	0.5692	0	6	HLAMP	5.53303
8	50000001	51000000	5	HLAMP	0.6607	0	6	HLAMP	6.02376
8	51000001	52000000	5	HLAMP	0.6371	0	6	HLAMP	5.89419
8	52000001	53000000	5	HLAMP	0.6718	0	6	HLAMP	6.08543
8	53000001	54000000	5	HLAMP	0.6599	0	6	HLAMP	6.01933
8	54000001	55000000	5	HLAMP	0.6841	0	6	HLAMP	6.15433
8	55000001	56000000	5	HLAMP	0.6402	0	6	HLAMP	5.91109
8	56000001	57000000	5	HLAMP	0.6256	0	6	HLAMP	5.83182
8	57000001	58000000	5	HLAMP	0.6052	0	6	HLAMP	5.7224
8	58000001	59000000	5	HLAMP	0.556	0	5	HLAMP	5.46477
8	59000001	60000000	5	HLAMP	0.6314	0	6	HLAMP	5.86322
8	60000001	61000000	5	HLAMP	0.6516	0	6	HLAMP	5.97355
8	61000001	62000000	5	HLAMP	0.6369	0	6	HLAMP	5.8931
8	62000001	63000000	5	HLAMP	0.6197	0	6	HLAMP	5.80002
8	63000001	64000000	5	HLAMP	0.5764	0	6	HLAMP	5.57053
8	64000001	65000000	5	HLAMP	0.583	0	6	HLAMP	5.60506
8	65000001	66000000	5	HLAMP	0.6559	0	6	HLAMP	5.99723
8	66000001	67000000	5	HLAMP	0.8797	0	7	HLAMP	7.33277
8	67000001	68000000	5	HLAMP	1.0085	0	8	HLAMP	8.20071
8	68000001	69000000	5	HLAMP	0.6228	0	6	HLAMP	5.81671
8	69000001	70000000	5	HLAMP	0.6129	0	6	HLAMP	5.76352
8	70000001	71000000	5	HLAMP	0.5768	0	6	HLAMP	5.57261
8	71000001	72000000	5	HLAMP	0.5674	0	6	HLAMP	5.52368
8	72000001	73000000	5	HLAMP	0.6501	0	6	HLAMP	5.9653
8	73000001	74000000	5	HLAMP	0.6805	0	6	HLAMP	6.13411
8	74000001	75000000	5	HLAMP	0.9581	0	8	HLAMP	7.85182
8	75000001	76000000	5	HLAMP	0.9523	0	8	HLAMP	7.81245
8	76000001	77000000	5	HLAMP	1.0263	0	8	HLAMP	8.32687
8	77000001	78000000	5	HLAMP	1.0377	0	8	HLAMP	8.40849
8	78000001	79000000	5	HLAMP	1.0065	0	8	HLAMP	8.18663
8	79000001	80000000	5	HLAMP	0.9358	0	8	HLAMP	7.7013
8	80000001	81000000	5	HLAMP	1.0376	0	8	HLAMP	8.40777
8	81000001	82000000	5	HLAMP	0.9635	0	8	HLAMP	7.88862
8	82000001	83000000	5	HLAMP	1.0479	0	8	HLAMP	8.48207
8	83000001	84000000	5	HLAMP	0.9597	0	8	HLAMP	7.86271
8	84000001	85000000	5	HLAMP	0.964	0	8	HLAMP	7.89204
8	87000001	88000000	5	HLAMP	0.9723	0	8	HLAMP	7.94889
8	88000001	89000000	5	HLAMP	1.0173	0	8	HLAMP	8.26289
8	89000001	90000000	5	HLAMP	0.974	0	8	HLAMP	7.96058
8	90000001	91000000	5	HLAMP	0.9453	0	8	HLAMP	7.76514
8	91000001	92000000	5	HLAMP	0.8964	0	7	HLAMP	7.44098
8	92000001	93000000	5	HLAMP	0.9659	0	8	HLAMP	7.90502
8	93000001	94000000	5	HLAMP	1.0171	0	8	HLAMP	8.26147
8	94000001	95000000	5	HLAMP	1.1505	0	9	HLAMP	9.25184
8	95000001	96000000	5	HLAMP	1.1296	0	9	HLAMP	9.09056
8	96000001	97000000	5	HLAMP	1.0535	0	9	HLAMP	8.52268
8	97000001	98000000	5	HLAMP	1.1319	0	9	HLAMP	9.10819
8	98000001	99000000	5	HLAMP	1.1295	0	9	HLAMP	9.08979
8	99000001	100000000	5	HLAMP	1.0547	0	9	HLAMP	8.53141
8	100000001	101000000	5	HLAMP	1.0779	0	9	HLAMP	8.70151
8	101000001	102000000	5	HLAMP	1.1668	0	9	HLAMP	9.37925
8	102000001	103000000	5	HLAMP	0.903	0	7	HLAMP	7.48409
8	103000001	104000000	5	HLAMP	1.058	0	9	HLAMP	8.55544
8	104000001	105000000	5	HLAMP	0.8963	0	7	HLAMP	7.44033
8	105000001	106000000	5	HLAMP	0.9401	0	8	HLAMP	7.73015
8	106000001	107000000	5	HLAMP	0.9421	0	8	HLAMP	7.74359
8	107000001	108000000	5	HLAMP	0.9279	0	8	HLAMP	7.64853
8	108000001	109000000	5	HLAMP	0.9113	0	8	HLAMP	7.53859
8	109000001	110000000	5	HLAMP	0.8824	0	7	HLAMP	7.35018
8	110000001	111000000	5	HLAMP	1.0379	0	8	HLAMP	8.40993
8	111000001	112000000	5	HLAMP	1.0007	0	8	HLAMP	8.14592
8	112000001	113000000	5	HLAMP	1.0708	0	9	HLAMP	8.64916
8	113000001	114000000	5	HLAMP	1.0332	0	8	HLAMP	8.37619
8	114000001	115000000	5	HLAMP	1.0131	0	8	HLAMP	8.23316
8	115000001	116000000	5	HLAMP	1.092	0	9	HLAMP	8.80624
8	116000001	117000000	5	HLAMP	0.9876	0	8	HLAMP	8.05455
8	117000001	118000000	5	HLAMP	0.9963	0	8	HLAMP	8.11514
8	118000001	119000000	5	HLAMP	0.9603	0	8	HLAMP	7.8668
8	119000001	120000000	5	HLAMP	0.9885	0	8	HLAMP	8.0608
8	120000001	121000000	5	HLAMP	1.0259	0	8	HLAMP	8.32402
8	121000001	122000000	5	HLAMP	1.0575	0	9	HLAMP	8.55179
8	122000001	123000000	5	HLAMP	1.1599	0	9	HLAMP	9.32514
8	123000001	124000000	5	HLAMP	1.1988	0	10	HLAMP	9.6336
8	124000001	125000000	5	HLAMP	1.1662	0	9	HLAMP	9.37453
8	125000001	126000000	5	HLAMP	1.2583	0	10	HLAMP	10.1218
8	126000001	127000000	5	HLAMP	1.1403	0	9	HLAMP	9.17283
8	127000001	128000000	5	HLAMP	1.2061	0	10	HLAMP	9.69242
8	128000001	129000000	5	HLAMP	0.8899	0	7	HLAMP	7.39871
8	129000001	130000000	5	HLAMP	0.764	0	7	HLAMP	6.61649
8	130000001	131000000	5	HLAMP	0.8675	0	7	HLAMP	7.2545
8	131000001	132000000	5	HLAMP	0.6781	0	6	HLAMP	6.12065
8	132000001	133000000	5	HLAMP	0.8803	0	7	HLAMP	7.33663
8	133000001	134000000	5	HLAMP	0.9137	0	8	HLAMP	7.55441
8	134000001	135000000	5	HLAMP	1.0362	0	8	HLAMP	8.39771
8	135000001	136000000	5	HLAMP	0.8538	0	7	HLAMP	7.1674
8	136000001	137000000	5	HLAMP	0.7459	0	7	HLAMP	6.50954
8	137000001	138000000	5	HLAMP	0.7824	0	7	HLAMP	6.7266
8	138000001	139000000	5	HLAMP	0.8464	0	7	HLAMP	7.12069
8	139000001	140000000	5	HLAMP	0.8285	0	7	HLAMP	7.0087
8	140000001	141000000	5	HLAMP	0.8853	0	7	HLAMP	7.36891
8	141000001	142000000	5	HLAMP	0.7411	0	6	HLAMP	6.48141
8	142000001	143000000	5	HLAMP	NA	0	NA	NA	NA
8	143000001	144000000	5	HLAMP	0.4849	0	5	HLAMP	5.10765
8	144000001	145000000	5	HLAMP	0.5244	0	5	HLAMP	5.30388
9	1000001	2000000	1	HETD	-0.7522	1	1	HETD	1.00794
9	2000001	3000000	1	HETD	-0.6987	1	1	HETD	1.1247
9	3000001	4000000	2	NEUT	-0.4419	0	2	NEUT	1.757
9	4000001	5000000	2	NEUT	-0.3109	0	2	NEUT	2.11046
9	5000001	6000000	2	NEUT	-0.3388	0	2	NEUT	2.03247
9	6000001	7000000	2	NEUT	-0.3824	0	2	NEUT	1.91357
9	7000001	8000000	2	NEUT	-0.3384	0	2	NEUT	2.03358
9	8000001	9000000	2	NEUT	-0.4061	0	2	NEUT	1.85043
9	9000001	10000000	2	NEUT	-0.3006	0	2	NEUT	2.13964
9	10000001	11000000	2	NEUT	-0.3082	0	2	NEUT	2.11809
9	11000001	12000000	2	NEUT	-0.2779	0	2	NEUT	2.20468
9	12000001	13000000	2	NEUT	-0.2962	0	2	NEUT	2.15216
9	13000001	14000000	2	NEUT	-0.4072	0	2	NEUT	1.84752
9	14000001	15000000	2	NEUT	-0.3875	0	2	NEUT	1.89989
9	15000001	16000000	2	NEUT	-0.433	0	2	NEUT	1.78001
9	16000001	17000000	2	NEUT	-0.3449	0	2	NEUT	2.01562
9	17000001	18000000	2	NEUT	-0.44	0	2	NEUT	1.7619
9	18000001	19000000	2	NEUT	-0.3607	0	2	NEUT	1.9723
9	19000001	20000000	2	NEUT	-0.3678	0	2	NEUT	1.95298
9	20000001	21000000	2	NEUT	-0.3835	0	2	NEUT	1.91062
9	21000001	22000000	2	NEUT	-1.3683	0	2	NEUT	0.015625
9	22000001	23000000	2	NEUT	-0.7423	0	2	NEUT	1.05801
9	23000001	24000000	2	NEUT	-0.3299	0	2	NEUT	2.05718
9	24000001	25000000	2	NEUT	-0.3515	0	2	NEUT	1.99746
9	25000001	26000000	2	NEUT	-0.3586	0	2	NEUT	1.97803
9	26000001	27000000	2	NEUT	-0.4033	0	2	NEUT	1.85784
9	27000001	28000000	2	NEUT	-0.3224	0	2	NEUT	2.07813
9	28000001	29000000	2	NEUT	-0.1027	0	2	NEUT	2.74263
9	29000001	30000000	4	AMP	0.3127	0	4	AMP	4.31228
9	30000001	31000000	4	AMP	0.2994	0	4	AMP	4.25471
9	31000001	32000000	4	AMP	0.219	0	4	AMP	3.91775
9	32000001	33000000	2	NEUT	-0.3606	0	2	NEUT	1.97257
9	34000001	35000000	2	NEUT	-0.3303	0	2	NEUT	2.05607
9	35000001	36000000	2	NEUT	-0.2609	0	2	NEUT	2.25406
9	36000001	37000000	2	NEUT	-0.3049	0	2	NEUT	2.12743
9	37000001	38000000	2	NEUT	-0.2959	0	2	NEUT	2.15302
9	71000001	72000000	3	GAIN	0.0045	0	3	GAIN	3.10549
9	72000001	73000000	3	GAIN	-0.1181	0	3	GAIN	2.69268
9	73000001	74000000	3	GAIN	0.0482	0	3	GAIN	3.26133
9	74000001	75000000	3	GAIN	-0.067	0	3	GAIN	2.86049
9	75000001	76000000	3	GAIN	-0.0461	0	3	GAIN	2.93085
9	76000001	77000000	3	GAIN	0.0042	0	3	GAIN	3.10444
9	77000001	78000000	3	GAIN	-0.0324	0	3	GAIN	2.97753
9	78000001	79000000	3	GAIN	-0.0773	0	3	GAIN	2.82619
9	79000001	80000000	3	GAIN	-0.107	0	3	GAIN	2.72863
9	80000001	81000000	3	GAIN	-0.0845	0	3	GAIN	2.80235
9	81000001	82000000	3	GAIN	-0.1051	0	3	GAIN	2.73481
9	82000001	83000000	3	GAIN	-0.0873	0	3	GAIN	2.79311
9	83000001	84000000	3	GAIN	-0.0387	0	3	GAIN	2.95601
9	84000001	85000000	3	GAIN	0.0662	0	3	GAIN	3.3269
9	85000001	86000000	3	GAIN	-0.0577	0	3	GAIN	2.89167
9	86000001	87000000	3	GAIN	-0.0042	0	3	GAIN	3.07503
9	87000001	88000000	3	GAIN	-0.0774	0	3	GAIN	2.82585
9	88000001	89000000	3	GAIN	-0.1259	0	3	GAIN	2.66759
9	89000001	90000000	3	GAIN	NA	0	3	GAIN	NA
9	90000001	91000000	3	GAIN	0.0311	0	3	GAIN	3.19978
9	91000001	92000000	3	GAIN	0.0056	0	3	GAIN	3.10936
9	93000001	94000000	3	GAIN	0.0539	0	3	GAIN	3.282
9	95000001	96000000	3	GAIN	0.0353	0	3	GAIN	3.21483
9	96000001	97000000	3	GAIN	-0.0433	0	3	GAIN	2.94036
9	97000001	98000000	3	GAIN	0.1812	0	3	GAIN	3.76571
9	98000001	99000000	3	GAIN	-0.0202	0	3	GAIN	3.01948
9	100000001	101000000	3	GAIN	-0.0596	0	3	GAIN	2.88529
9	101000001	102000000	3	GAIN	-0.1219	0	3	GAIN	2.68044
9	102000001	103000000	3	GAIN	-0.0448	0	3	GAIN	2.93526
9	103000001	104000000	3	GAIN	-0.0401	0	3	GAIN	2.95124
9	104000001	105000000	3	GAIN	-0.0548	0	3	GAIN	2.90144
9	105000001	106000000	4	AMP	0.1319	0	4	AMP	3.5733
9	106000001	107000000	4	AMP	0.162	0	4	AMP	3.68999
9	107000001	108000000	4	AMP	0.2545	0	4	AMP	4.06422
9	108000001	109000000	4	AMP	0.2983	0	4	AMP	4.24997
9	109000001	110000000	2	NEUT	-0.2133	0	2	NEUT	2.39547
9	110000001	111000000	2	NEUT	-0.4378	0	2	NEUT	1.76758
9	111000001	112000000	2	NEUT	-0.4161	0	2	NEUT	1.8241
9	112000001	113000000	2	NEUT	-0.3995	0	2	NEUT	1.86791
9	113000001	114000000	2	NEUT	-0.4353	0	2	NEUT	1.77405
9	114000001	115000000	2	NEUT	-0.3035	0	2	NEUT	2.1314
9	115000001	116000000	2	NEUT	-0.2833	0	2	NEUT	2.18911
9	116000001	117000000	2	NEUT	-0.3198	0	2	NEUT	2.08542
9	117000001	118000000	2	NEUT	-0.392	0	2	NEUT	1.88787
9	118000001	119000000	2	NEUT	-0.2747	0	2	NEUT	2.21393
9	119000001	120000000	2	NEUT	0.0024	0	2	NEUT	3.09812
9	120000001	121000000	2	NEUT	-0.7091	0	2	NEUT	1.1283
9	121000001	122000000	2	NEUT	-0.1085	0	2	NEUT	2.72376
9	122000001	123000000	2	NEUT	0.2275	0	2	NEUT	3.9525
9	123000001	124000000	2	NEUT	-0.1485	0	2	NEUT	2.59563
9	124000001	125000000	2	NEUT	-0.3612	0	2	NEUT	1.97093
9	125000001	126000000	2	NEUT	-0.3429	0	2	NEUT	2.02113
9	126000001	127000000	2	NEUT	-0.3593	0	2	NEUT	1.97612
9	127000001	128000000	2	NEUT	-0.3262	0	2	NEUT	2.0675
9	128000001	129000000	2	NEUT	-0.4684	0	2	NEUT	1.68932
9	129000001	130000000	2	NEUT	-0.4702	0	2	NEUT	1.68477
9	130000001	131000000	2	NEUT	-0.4723	0	2	NEUT	1.67946
9	131000001	132000000	2	NEUT	-0.2609	0	2	NEUT	2.25406
9	132000001	133000000	2	NEUT	-0.3648	0	2	NEUT	1.96113
9	134000001	135000000	2	NEUT	NA	0	2	NEUT	NA
9	135000001	136000000	2	NEUT	-0.511	0	2	NEUT	1.58309
9	136000001	137000000	2	NEUT	NA	0	2	NEUT	NA
9	137000001	138000000	2	NEUT	NA	0	2	NEUT	NA
10	1000001	2000000	3	GAIN	-0.104	1	3	GAIN	2.76096
10	2000001	3000000	3	GAIN	-0.0466	1	3	GAIN	2.95756
10	3000001	4000000	3	GAIN	0.0221	1	3	GAIN	3.20337
10	4000001	5000000	3	GAIN	-0.044	1	3	GAIN	2.96665
10	5000001	6000000	3	GAIN	-0.0077	1	3	GAIN	3.09531
10	6000001	7000000	3	GAIN	-0.0277	1	3	GAIN	3.02402
10	7000001	8000000	3	GAIN	-0.0164	1	3	GAIN	3.06418
10	8000001	9000000	3	GAIN	-0.1005	1	3	GAIN	2.77272
10	9000001	10000000	3	GAIN	-0.1066	1	3	GAIN	2.75224
10	10000001	11000000	3	GAIN	-0.1106	1	3	GAIN	2.73885
10	11000001	12000000	3	GAIN	0.0331	1	3	GAIN	3.24383
10	12000001	13000000	3	GAIN	-0.0118	1	3	GAIN	3.08061
10	13000001	14000000	3	GAIN	-0.0216	1	3	GAIN	3.04566
10	14000001	15000000	3	GAIN	0.0163	1	3	GAIN	3.18217
10	15000001	16000000	3	GAIN	-0.0212	1	3	GAIN	3.04708
10	16000001	17000000	3	GAIN	-0.0516	1	3	GAIN	2.94012
10	19000001	20000000	3	GAIN	-0.2331	1	3	GAIN	2.34635
10	20000001	21000000	1	HETD	-0.8534	1	1	HETD	0.79857
10	21000001	22000000	1	HETD	-0.7622	1	1	HETD	0.986588
10	22000001	23000000	1	HETD	-0.7477	1	1	HETD	1.01759
10	23000001	24000000	1	HETD	-0.8102	1	1	HETD	0.88615
10	24000001	25000000	1	HETD	-0.5793	1	1	HETD	1.40144
10	25000001	26000000	3	GAIN	-0.1328	1	3	GAIN	2.66523
10	26000001	27000000	3	GAIN	-0.0534	1	3	GAIN	2.93386
10	27000001	28000000	3	GAIN	-0.098	1	3	GAIN	2.78115
10	28000001	29000000	3	GAIN	0.0103	1	3	GAIN	3.16032
10	29000001	30000000	3	GAIN	0.0112	1	3	GAIN	3.16359
10	30000001	31000000	3	GAIN	-0.0155	1	3	GAIN	3.06739
10	31000001	32000000	3	GAIN	-0.0762	1	3	GAIN	2.8552
10	32000001	33000000	3	GAIN	-0.0523	1	3	GAIN	2.93768
10	33000001	34000000	3	GAIN	-0.0078	1	3	GAIN	3.09495
10	34000001	35000000	3	GAIN	0.3071	1	3	GAIN	4.3579
10	35000001	36000000	3	GAIN	0.5261	1	3	GAIN	5.41368
10	36000001	37000000	3	GAIN	0.3589	1	3	GAIN	4.59335
10	43000001	44000000	3	GAIN	-0.0461	1	3	GAIN	2.9593
10	44000001	45000000	3	GAIN	-0.1218	1	3	GAIN	2.70157
10	52000001	53000000	3	GAIN	-0.1158	1	3	GAIN	2.7215
10	53000001	54000000	3	GAIN	NA	1	3	GAIN	NA
10	54000001	55000000	3	GAIN	NA	1	3	GAIN	NA
10	55000001	56000000	3	GAIN	0.004	1	3	GAIN	3.13747
10	56000001	57000000	3	GAIN	0.0129	1	3	GAIN	3.16977
10	57000001	58000000	3	GAIN	-0.0169	1	3	GAIN	3.06239
10	58000001	59000000	3	GAIN	NA	1	3	GAIN	NA
10	59000001	60000000	3	GAIN	NA	1	3	GAIN	NA
10	60000001	61000000	3	GAIN	NA	1	3	GAIN	NA
10	61000001	62000000	3	GAIN	NA	1	3	GAIN	NA
10	62000001	63000000	3	GAIN	NA	1	3	GAIN	NA
10	63000001	64000000	3	GAIN	-0.0363	1	3	GAIN	2.99367
10	64000001	65000000	3	GAIN	NA	1	3	GAIN	NA
10	65000001	66000000	3	GAIN	0.0264	1	3	GAIN	3.21915
10	66000001	67000000	3	GAIN	-0.0043	1	3	GAIN	3.10752
10	67000001	68000000	3	GAIN	-0.138	1	3	GAIN	2.64814
10	68000001	69000000	3	GAIN	-0.0453	1	3	GAIN	2.9621
10	69000001	70000000	3	GAIN	0.0092	1	3	GAIN	3.15632
10	70000001	71000000	3	GAIN	0.0713	1	3	GAIN	3.38675
10	71000001	72000000	3	GAIN	-0.1262	1	3	GAIN	2.687
10	72000001	73000000	3	GAIN	-0.099	1	3	GAIN	2.77778
10	73000001	74000000	3	GAIN	-0.0707	1	3	GAIN	2.87406
10	74000001	75000000	3	GAIN	0.0162	1	3	GAIN	3.1818
10	75000001	76000000	3	GAIN	0.0937	1	3	GAIN	3.47234
10	76000001	77000000	3	GAIN	-0.0186	1	3	GAIN	3.05633
10	77000001	78000000	3	GAIN	-0.0544	1	3	GAIN	2.93038
10	78000001	79000000	3	GAIN	-0.0451	1	3	GAIN	2.9628
10	80000001	81000000	3	GAIN	-0.0835	1	3	GAIN	2.83028
10	82000001	83000000	3	GAIN	-0.065	1	3	GAIN	2.89368
10	83000001	84000000	3	GAIN	-0.0579	1	3	GAIN	2.91823
10	84000001	85000000	3	GAIN	-0.3872	1	3	GAIN	1.89766
10	85000001	86000000	1	HETD	-0.7731	1	1	HETD	0.963486
10	86000001	87000000	1	HETD	-0.7338	1	1	HETD	1.04761
10	88000001	89000000	1	HETD	-0.7653	1	1	HETD	0.98
10	90000001	91000000	1	HETD	-0.8273	1	1	HETD	0.851169
10	91000001	92000000	1	HETD	-0.79	1	1	HETD	0.928011
10	92000001	93000000	1	HETD	-0.7713	1	1	HETD	0.967289
10	93000001	94000000	1	HETD	-0.5866	1	1	HETD	1.38385
10	94000001	95000000	2	NEUT	-0.3232	0	2	NEUT	2.07589
10	95000001	96000000	2	NEUT	-0.3494	0	2	NEUT	2.00323
10	96000001	97000000	2	NEUT	-0.3715	0	2	NEUT	1.94296
10	97000001	98000000	2	NEUT	-0.2956	0	2	NEUT	2.15388
10	98000001	99000000	2	NEUT	-0.288	0	2	NEUT	2.17561
10	99000001	100000000	2	NEUT	-0.3471	0	2	NEUT	2.00956
10	100000001	101000000	2	NEUT	-0.3449	0	2	NEUT	2.01562
10	101000001	102000000	2	NEUT	-0.3359	0	2	NEUT	2.04051
10	102000001	103000000	2	NEUT	-0.3547	0	2	NEUT	1.98869
10	103000001	104000000	2	NEUT	-0.291	0	2	NEUT	2.16702
10	104000001	105000000	2	NEUT	-0.2104	0	2	NEUT	2.40424
10	105000001	106000000	2	NEUT	-0.407	0	2	NEUT	1.84805
10	106000001	107000000	2	NEUT	-0.4268	0	2	NEUT	1.79612
10	107000001	108000000	2	NEUT	-0.3845	0	2	NEUT	1.90793
10	108000001	109000000	2	NEUT	-0.4376	0	2	NEUT	1.7681
10	109000001	110000000	2	NEUT	-0.3292	0	2	NEUT	2.05913
10	110000001	111000000	2	NEUT	-0.38	0	2	NEUT	1.92002
10	111000001	112000000	2	NEUT	-0.2788	0	2	NEUT	2.20208
10	112000001	113000000	2	NEUT	-0.2847	0	2	NEUT	2.18509
10	113000001	114000000	2	NEUT	0.1163	0	2	NEUT	3.51378
10	114000001	115000000	2	NEUT	NA	0	2	NEUT	NA
10	115000001	116000000	2	NEUT	-0.3822	0	2	NEUT	1.91411
10	116000001	117000000	2	NEUT	NA	0	2	NEUT	NA
10	117000001	118000000	2	NEUT	-0.3252	0	2	NEUT	2.0703
10	118000001	119000000	2	NEUT	-0.3271	0	2	NEUT	2.06499
10	119000001	120000000	2	NEUT	-0.1502	0	2	NEUT	2.59027
10	120000001	121000000	5	HLAMP	0.273	0	4	AMP	4.14199
10	121000001	122000000	5	HLAMP	0.7336	0	6	HLAMP	6.43763
10	122000001	123000000	5	HLAMP	0.1815	0	4	AMP	3.7669
10	123000001	124000000	5	HLAMP	0.2777	0	4	AMP	4.16191
10	124000001	125000000	5	HLAMP	NA	0	NA	NA	NA
10	125000001	126000000	5	HLAMP	NA	0	NA	NA	NA
10	126000001	127000000	5	HLAMP	0.5161	0	5	HLAMP	5.2622
10	127000001	128000000	5	HLAMP	0.4123	0	5	HLAMP	4.76071
10	129000001	130000000	5	HLAMP	0.4198	0	5	HLAMP	4.79575
10	130000001	131000000	5	HLAMP	0.4102	0	5	HLAMP	4.75093
10	131000001	132000000	5	HLAMP	NA	0	NA	NA	NA
10	132000001	133000000	5	HLAMP	0.2329	0	4	AMP	3.97467
11	1000001	2000000	2	NEUT	NA	0	2	NEUT	NA
11	2000001	3000000	2	NEUT	-0.5949	0	2	NEUT	1.38283
11	5000001	6000000	2	NEUT	-0.4082	0	2	NEUT	1.84489
11	6000001	7000000	2	NEUT	-0.3202	0	2	NEUT	2.0843
11	7000001	8000000	2	NEUT	-0.4063	0	2	NEUT	1.8499
11	8000001	9000000	2	NEUT	-0.3844	0	2	NEUT	1.9082
11	9000001	10000000	2	NEUT	-0.3255	0	2	NEUT	2.06946
11	10000001	11000000	2	NEUT	-0.3026	0	2	NEUT	2.13396
11	11000001	12000000	2	NEUT	-0.3481	0	2	NEUT	2.0068
11	12000001	13000000	2	NEUT	-0.3373	0	2	NEUT	2.03662
11	13000001	14000000	2	NEUT	-0.3702	0	2	NEUT	1.94648
11	14000001	15000000	2	NEUT	-0.3825	0	2	NEUT	1.9133
11	15000001	16000000	2	NEUT	-0.2984	0	2	NEUT	2.1459
11	16000001	17000000	2	NEUT	-0.3906	0	2	NEUT	1.89161
11	17000001	18000000	2	NEUT	-0.3646	0	2	NEUT	1.96168
11	18000001	19000000	2	NEUT	-0.34	0	2	NEUT	2.02915
11	19000001	20000000	2	NEUT	-0.3045	0	2	NEUT	2.12857
11	20000001	21000000	2	NEUT	-0.3103	0	2	NEUT	2.11215
11	21000001	22000000	2	NEUT	-0.39	0	2	NEUT	1.89321
11	22000001	23000000	2	NEUT	-0.1541	0	2	NEUT	2.57798
11	23000001	24000000	2	NEUT	-0.0554	0	2	NEUT	2.89942
11	24000001	25000000	2	NEUT	-0.1858	0	2	NEUT	2.47932
11	25000001	26000000	2	NEUT	-0.3529	0	2	NEUT	1.99362
11	26000001	27000000	2	NEUT	-0.3623	0	2	NEUT	1.96794
11	27000001	28000000	2	NEUT	-0.3737	0	2	NEUT	1.93701
11	28000001	29000000	2	NEUT	-0.4006	0	2	NEUT	1.86499
11	29000001	30000000	2	NEUT	-0.3948	0	2	NEUT	1.8804
11	30000001	31000000	2	NEUT	-0.3645	0	2	NEUT	1.96195
11	31000001	32000000	2	NEUT	-0.4547	0	2	NEUT	1.72415
11	32000001	33000000	2	NEUT	-0.4078	0	2	NEUT	1.84594
11	33000001	34000000	2	NEUT	-0.2209	0	2	NEUT	2.37258
11	34000001	35000000	3	GAIN	0.0728	0	3	GAIN	3.35115
11	35000001	36000000	3	GAIN	0.0379	0	3	GAIN	3.22417
11	36000001	37000000	3	GAIN	0.0561	0	3	GAIN	3.29
11	37000001	38000000	3	GAIN	0.0089	0	3	GAIN	3.12097
11	38000001	39000000	3	GAIN	0.0358	0	3	GAIN	3.21663
11	39000001	40000000	3	GAIN	-0.1091	0	3	GAIN	2.72181
11	40000001	41000000	3	GAIN	-0.062	0	3	GAIN	2.87723
11	41000001	42000000	3	GAIN	-0.0075	0	3	GAIN	3.06352
11	42000001	43000000	3	GAIN	-0.1041	0	3	GAIN	2.73807
11	43000001	44000000	4	AMP	0.2365	0	4	AMP	3.98951
11	44000001	45000000	4	AMP	0.2854	0	4	AMP	4.19467
11	45000001	46000000	4	AMP	-0.0323	0	4	AMP	2.97788
11	46000001	47000000	4	AMP	0.0481	0	4	AMP	3.26096
11	47000001	48000000	4	AMP	0.1194	0	4	AMP	3.52555
11	56000001	57000000	4	AMP	0.1792	0	4	AMP	3.75778
11	57000001	58000000	4	AMP	0.2695	0	4	AMP	4.1272
11	58000001	59000000	4	AMP	0.2063	0	4	AMP	3.86623
11	59000001	60000000	4	AMP	0.2459	0	4	AMP	4.02841
11	60000001	61000000	4	AMP	0.3207	0	4	AMP	4.34716
11	61000001	62000000	4	AMP	0.3283	0	4	AMP	4.38049
11	62000001	63000000	4	AMP	0.5647	0	4	AMP	5.50969
11	64000001	65000000	4	AMP	0.3454	0	4	AMP	4.45611
11	65000001	66000000	4	AMP	0.4073	0	4	AMP	4.73745
11	66000001	67000000	4	AMP	0.3166	0	4	AMP	4.32926
11	68000001	69000000	4	AMP	0.2584	0	4	AMP	4.08053
11	70000001	71000000	2	NEUT	NA	0	2	NEUT	NA
11	72000001	73000000	2	NEUT	-0.3423	0	2	NEUT	2.02279
11	73000001	74000000	2	NEUT	-0.3083	0	2	NEUT	2.11781
11	74000001	75000000	2	NEUT	-0.3312	0	2	NEUT	2.05356
11	75000001	76000000	2	NEUT	-0.3116	0	2	NEUT	2.10849
11	76000001	77000000	2	NEUT	-0.304	0	2	NEUT	2.12998
11	77000001	78000000	2	NEUT	-0.3227	0	2	NEUT	2.07729
11	78000001	79000000	2	NEUT	-0.3171	0	2	NEUT	2.093
11	79000001	80000000	2	NEUT	-0.2894	0	2	NEUT	2.1716
11	80000001	81000000	2	NEUT	-0.3222	0	2	NEUT	2.07869
11	81000001	82000000	2	NEUT	-0.3566	0	2	NEUT	1.98349
11	82000001	83000000	2	NEUT	-0.3581	0	2	NEUT	1.97939
11	83000001	84000000	2	NEUT	-0.3848	0	2	NEUT	1.90713
11	84000001	85000000	2	NEUT	-0.3124	0	2	NEUT	2.10623
11	85000001	86000000	2	NEUT	-0.3213	0	2	NEUT	2.08121
11	86000001	87000000	2	NEUT	-0.3383	0	2	NEUT	2.03385
11	87000001	88000000	2	NEUT	NA	0	2	NEUT	NA
11	88000001	89000000	2	NEUT	NA	0	2	NEUT	NA
11	91000001	92000000	2	NEUT	-0.2412	0	2	NEUT	2.31202
11	92000001	93000000	4	AMP	0.2186	0	4	AMP	3.91612
11	93000001	94000000	4	AMP	0.2115	0	4	AMP	3.88727
11	94000001	95000000	4	AMP	0.3817	0	4	AMP	4.61963
11	95000001	96000000	4	AMP	0.2419	0	4	AMP	4.01182
11	97000001	98000000	4	AMP	0.2879	0	4	AMP	4.20535
11	98000001	99000000	4	AMP	0.2814	0	4	AMP	4.17763
11	99000001	100000000	4	AMP	0.2948	0	4	AMP	4.23492
11	100000001	101000000	4	AMP	0.1637	0	4	AMP	3.69666
11	101000001	102000000	4	AMP	0.169	0	4	AMP	3.71748
11	102000001	103000000	4	AMP	0.1618	0	4	AMP	3.68921
11	103000001	104000000	2	NEUT	-1.4181	0	2	NEUT	0.015625
11	104000001	105000000	2	NEUT	-1.1441	0	2	NEUT	0.323983
11	105000001	106000000	2	NEUT	-0.2805	0	2	NEUT	2.19718
11	106000001	107000000	2	NEUT	-0.3444	0	2	NEUT	2.017
11	107000001	108000000	2	NEUT	-0.4014	0	2	NEUT	1.86287
11	108000001	109000000	2	NEUT	-0.3215	0	2	NEUT	2.08065
11	109000001	110000000	3	GAIN	-0.0652	0	3	GAIN	2.86651
11	110000001	111000000	3	GAIN	-0.0691	0	3	GAIN	2.85348
11	111000001	112000000	3	GAIN	0.0499	0	3	GAIN	3.26748
11	112000001	113000000	3	GAIN	0.0149	0	3	GAIN	3.14215
11	113000001	114000000	3	GAIN	0.0072	0	3	GAIN	3.11498
11	114000001	115000000	3	GAIN	-0.0285	0	3	GAIN	2.9909
11	115000001	116000000	3	GAIN	-0.0209	0	3	GAIN	3.01706
11	116000001	117000000	3	GAIN	-0.0574	0	3	GAIN	2.89268
11	117000001	118000000	3	GAIN	-0.018	0	3	GAIN	3.02708
11	118000001	119000000	3	GAIN	0.0442	0	3	GAIN	3.24686
11	119000001	120000000	3	GAIN	-0.0713	0	3	GAIN	2.84614
11	120000001	121000000	3	GAIN	-0.0555	0	3	GAIN	2.89908
11	121000001	122000000	3	GAIN	0.0132	0	3	GAIN	3.13614
11	122000001	123000000	3	GAIN	0.0036	0	3	GAIN	3.10233
11	123000001	124000000	3	GAIN	-0.0367	0	3	GAIN	2.96284
11	124000001	125000000	3	GAIN	-0.0304	0	3	GAIN	2.98439
11	125000001	126000000	3	GAIN	-0.0369	0	3	GAIN	2.96215
11	126000001	127000000	3	GAIN	0.0046	0	3	GAIN	3.10584
11	127000001	128000000	3	GAIN	-0.0823	0	3	GAIN	2.80962
11	128000001	129000000	3	GAIN	0.0422	0	3	GAIN	3.23965
11	129000001	130000000	3	GAIN	0.0123	0	3	GAIN	3.13296
11	130000001	131000000	3	GAIN	0.0372	0	3	GAIN	3.22165
11	131000001	132000000	3	GAIN	-0.0188	0	3	GAIN	3.02432
11	132000001	133000000	3	GAIN	0.0282	0	3	GAIN	3.18942
11	133000001	134000000	3	GAIN	-0.0198	0	3	GAIN	3.02086
11	134000001	135000000	3	GAIN	NA	0	3	GAIN	NA
12	1000001	2000000	5	HLAMP	1.2027	0	10	HLAMP	9.66499
12	2000001	3000000	5	HLAMP	1.3591	0	11	HLAMP	10.9963
12	3000001	4000000	5	HLAMP	1.1363	0	9	HLAMP	9.14201
12	4000001	5000000	5	HLAMP	1.089	0	9	HLAMP	8.78387
12	5000001	6000000	5	HLAMP	0.8532	0	7	HLAMP	7.1636
12	6000001	7000000	5	HLAMP	NA	0	NA	NA	NA
12	7000001	8000000	5	HLAMP	NA	0	NA	NA	NA
12	10000001	11000000	5	HLAMP	0.376	0	5	HLAMP	4.59368
12	11000001	12000000	5	HLAMP	0.4927	0	5	HLAMP	5.14597
12	12000001	13000000	5	HLAMP	0.2544	0	4	AMP	4.0638
12	13000001	14000000	2	NEUT	-0.3378	0	2	NEUT	2.03524
12	14000001	15000000	2	NEUT	-0.3319	0	2	NEUT	2.05162
12	15000001	16000000	2	NEUT	-0.3837	0	2	NEUT	1.91008
12	16000001	17000000	2	NEUT	-0.3278	0	2	NEUT	2.06304
12	17000001	18000000	2	NEUT	-0.4023	0	2	NEUT	1.86048
12	18000001	19000000	2	NEUT	-0.4078	0	2	NEUT	1.84594
12	19000001	20000000	2	NEUT	-0.4611	0	2	NEUT	1.70784
12	20000001	21000000	2	NEUT	-0.4297	0	2	NEUT	1.78858
12	21000001	22000000	2	NEUT	-0.377	0	2	NEUT	1.9281
12	22000001	23000000	2	NEUT	-0.4161	0	2	NEUT	1.8241
12	23000001	24000000	2	NEUT	-0.3151	0	2	NEUT	2.09862
12	24000001	25000000	2	NEUT	-0.4194	0	2	NEUT	1.81545
12	25000001	26000000	2	NEUT	-0.3762	0	2	NEUT	1.93026
12	26000001	27000000	4	AMP	-0.0298	0	4	AMP	2.98644
12	27000001	28000000	4	AMP	0.1539	0	4	AMP	3.65835
12	28000001	29000000	4	AMP	0.2336	0	4	AMP	3.97756
12	29000001	30000000	4	AMP	0.1866	0	4	AMP	3.78719
12	30000001	31000000	4	AMP	0.2338	0	4	AMP	3.97838
12	32000001	33000000	4	AMP	0.2648	0	4	AMP	4.1074
12	39000001	40000000	4	AMP	0.135	0	4	AMP	3.58521
12	40000001	41000000	4	AMP	0.2387	0	4	AMP	3.99859
12	41000001	42000000	4	AMP	0.1527	0	4	AMP	3.65368
12	42000001	43000000	4	AMP	0.2037	0	4	AMP	3.85573
12	43000001	44000000	4	AMP	0.1855	0	4	AMP	3.78281
12	44000001	45000000	4	AMP	0.221	0	4	AMP	3.92591
12	45000001	46000000	4	AMP	0.2115	0	4	AMP	3.88727
12	46000001	47000000	4	AMP	0.2664	0	4	AMP	4.11413
12	47000001	48000000	4	AMP	0.2592	0	4	AMP	4.08388
12	48000001	49000000	4	AMP	0.2929	0	4	AMP	4.22676
12	49000001	50000000	4	AMP	0.3236	0	4	AMP	4.35986
12	50000001	51000000	4	AMP	0.304	0	4	AMP	4.27456
12	51000001	52000000	4	AMP	0.2984	0	4	AMP	4.2504
12	52000001	53000000	2	NEUT	-0.3487	0	2	NEUT	2.00515
12	53000001	54000000	2	NEUT	-0.2979	0	2	NEUT	2.14732
12	54000001	55000000	2	NEUT	-0.366	0	2	NEUT	1.95787
12	56000001	57000000	2	NEUT	-0.2727	0	2	NEUT	2.21972
12	57000001	58000000	2	NEUT	-0.2273	0	2	NEUT	2.35339
12	58000001	59000000	2	NEUT	-0.3318	0	2	NEUT	2.0519
12	59000001	60000000	2	NEUT	-0.4016	0	2	NEUT	1.86234
12	60000001	61000000	2	NEUT	-0.3763	0	2	NEUT	1.92999
12	61000001	62000000	2	NEUT	-0.3933	0	2	NEUT	1.8844
12	62000001	63000000	2	NEUT	-0.3669	0	2	NEUT	1.95543
12	64000001	65000000	2	NEUT	-0.3879	0	2	NEUT	1.89882
12	65000001	66000000	2	NEUT	-0.3378	0	2	NEUT	2.03524
12	66000001	67000000	2	NEUT	-0.3298	0	2	NEUT	2.05746
12	67000001	68000000	2	NEUT	-0.3855	0	2	NEUT	1.90525
12	68000001	69000000	2	NEUT	-0.3693	0	2	NEUT	1.94892
12	69000001	70000000	2	NEUT	-0.3336	0	2	NEUT	2.04689
12	70000001	71000000	2	NEUT	-0.4418	0	2	NEUT	1.75726
12	71000001	72000000	2	NEUT	-0.4035	0	2	NEUT	1.85731
12	72000001	73000000	2	NEUT	-0.3922	0	2	NEUT	1.88734
12	73000001	74000000	2	NEUT	-0.3743	0	2	NEUT	1.93539
12	74000001	75000000	2	NEUT	-0.3464	0	2	NEUT	2.01148
12	75000001	76000000	2	NEUT	-0.3625	0	2	NEUT	1.96739
12	76000001	77000000	2	NEUT	-0.3235	0	2	NEUT	2.07505
12	77000001	78000000	2	NEUT	-0.3568	0	2	NEUT	1.98295
12	78000001	79000000	2	NEUT	-0.3301	0	2	NEUT	2.05663
12	79000001	80000000	2	NEUT	-0.3726	0	2	NEUT	1.93998
12	80000001	81000000	2	NEUT	-0.4206	0	2	NEUT	1.81231
12	81000001	82000000	2	NEUT	-0.3346	0	2	NEUT	2.04411
12	82000001	83000000	2	NEUT	-0.4251	0	2	NEUT	1.80056
12	83000001	84000000	2	NEUT	-0.3688	0	2	NEUT	1.95027
12	84000001	85000000	2	NEUT	-0.2812	0	2	NEUT	2.19516
12	85000001	86000000	2	NEUT	-0.3159	0	2	NEUT	2.09637
12	86000001	87000000	2	NEUT	-0.3028	0	2	NEUT	2.13339
12	87000001	88000000	2	NEUT	-0.3703	0	2	NEUT	1.94621
12	88000001	89000000	2	NEUT	-0.3813	0	2	NEUT	1.91653
12	89000001	90000000	2	NEUT	-0.3294	0	2	NEUT	2.05858
12	90000001	91000000	2	NEUT	-0.3376	0	2	NEUT	2.03579
12	91000001	92000000	2	NEUT	-0.3518	0	2	NEUT	1.99664
12	92000001	93000000	2	NEUT	-0.3571	0	2	NEUT	1.98213
12	93000001	94000000	2	NEUT	-0.2844	0	2	NEUT	2.18595
12	94000001	95000000	2	NEUT	-0.2979	0	2	NEUT	2.14732
12	95000001	96000000	2	NEUT	-0.3375	0	2	NEUT	2.03607
12	96000001	97000000	2	NEUT	-0.3509	0	2	NEUT	1.99911
12	97000001	98000000	2	NEUT	-0.4293	0	2	NEUT	1.78962
12	98000001	99000000	2	NEUT	-0.3291	0	2	NEUT	2.05941
12	99000001	100000000	2	NEUT	-0.3215	0	2	NEUT	2.08065
12	100000001	101000000	2	NEUT	-0.3337	0	2	NEUT	2.04661
12	101000001	102000000	2	NEUT	-0.3497	0	2	NEUT	2.00241
12	102000001	103000000	2	NEUT	-0.3845	0	2	NEUT	1.90793
12	103000001	104000000	2	NEUT	-0.2995	0	2	NEUT	2.14277
12	104000001	105000000	2	NEUT	-0.3052	0	2	NEUT	2.12658
12	105000001	106000000	2	NEUT	-0.3045	0	2	NEUT	2.12857
12	106000001	107000000	2	NEUT	-0.3306	0	2	NEUT	2.05523
12	107000001	108000000	2	NEUT	-0.3441	0	2	NEUT	2.01782
12	108000001	109000000	2	NEUT	-0.3455	0	2	NEUT	2.01396
12	109000001	110000000	2	NEUT	NA	0	2	NEUT	NA
12	110000001	111000000	2	NEUT	-0.2937	0	2	NEUT	2.1593
12	111000001	112000000	2	NEUT	-0.3587	0	2	NEUT	1.97775
12	112000001	113000000	2	NEUT	-0.2713	0	2	NEUT	2.22378
12	113000001	114000000	2	NEUT	-0.3866	0	2	NEUT	1.9023
12	114000001	115000000	2	NEUT	-0.4021	0	2	NEUT	1.86101
12	115000001	116000000	2	NEUT	-0.3113	0	2	NEUT	2.10933
12	116000001	117000000	2	NEUT	-0.302	0	2	NEUT	2.13566
12	117000001	118000000	2	NEUT	-0.3325	0	2	NEUT	2.04995
12	118000001	119000000	2	NEUT	-0.3191	0	2	NEUT	2.08738
12	119000001	120000000	2	NEUT	-0.3716	0	2	NEUT	1.94269
12	120000001	121000000	2	NEUT	-0.3414	0	2	NEUT	2.02528
12	121000001	122000000	2	NEUT	NA	0	2	NEUT	NA
12	122000001	123000000	2	NEUT	NA	0	2	NEUT	NA
12	123000001	124000000	2	NEUT	NA	0	2	NEUT	NA
12	124000001	125000000	2	NEUT	-0.445	0	2	NEUT	1.74902
12	125000001	126000000	2	NEUT	-0.3261	0	2	NEUT	2.06778
12	126000001	127000000	2	NEUT	-0.3231	0	2	NEUT	2.07617
12	127000001	128000000	2	NEUT	-0.3585	0	2	NEUT	1.9783
12	128000001	129000000	2	NEUT	-0.3969	0	2	NEUT	1.87482
12	129000001	130000000	2	NEUT	-0.3884	0	2	NEUT	1.89749
12	130000001	131000000	2	NEUT	-0.3205	0	2	NEUT	2.08345
12	131000001	132000000	2	NEUT	-0.5395	0	2	NEUT	1.51375
13	20000001	21000000	4	AMP	0.3435	0	4	AMP	4.44766
13	21000001	22000000	4	AMP	0.276	0	4	AMP	4.15469
13	22000001	23000000	4	AMP	0.2136	0	4	AMP	3.89579
13	23000001	24000000	4	AMP	0.2499	0	4	AMP	4.04504
13	24000001	25000000	4	AMP	0.2449	0	4	AMP	4.02426
13	25000001	26000000	4	AMP	0.2723	0	4	AMP	4.13903
13	26000001	27000000	4	AMP	0.2599	0	4	AMP	4.08682
13	27000001	28000000	5	HLAMP	0.4028	0	5	HLAMP	4.71659
13	28000001	29000000	5	HLAMP	0.5066	0	5	HLAMP	5.21478
13	29000001	30000000	5	HLAMP	0.4742	0	5	HLAMP	5.05541
13	30000001	31000000	5	HLAMP	0.4462	0	5	HLAMP	4.92054
13	31000001	32000000	5	HLAMP	0.4782	0	5	HLAMP	5.0749
13	32000001	33000000	5	HLAMP	0.477	0	5	HLAMP	5.06905
13	33000001	34000000	5	HLAMP	0.4914	0	5	HLAMP	5.13957
13	34000001	35000000	5	HLAMP	0.4494	0	5	HLAMP	4.93582
13	35000001	36000000	5	HLAMP	0.3854	0	5	HLAMP	4.63653
13	36000001	37000000	5	HLAMP	0.4237	0	5	HLAMP	4.81404
13	37000001	38000000	5	HLAMP	0.453	0	5	HLAMP	4.95306
13	38000001	39000000	5	HLAMP	0.4482	0	5	HLAMP	4.93009
13	39000001	40000000	5	HLAMP	0.4233	0	5	HLAMP	4.81216
13	40000001	41000000	5	HLAMP	0.423	0	5	HLAMP	4.81075
13	41000001	42000000	5	HLAMP	0.5322	0	5	HLAMP	5.34326
13	42000001	43000000	5	HLAMP	0.4148	0	5	HLAMP	4.77237
13	43000001	44000000	5	HLAMP	0.4098	0	5	HLAMP	4.74907
13	44000001	45000000	5	HLAMP	0.502	0	5	HLAMP	5.19194
13	45000001	46000000	5	HLAMP	0.5032	0	5	HLAMP	5.19789
13	46000001	47000000	5	HLAMP	0.4148	0	5	HLAMP	4.77237
13	47000001	48000000	5	HLAMP	0.4351	0	5	HLAMP	4.86779
13	48000001	49000000	5	HLAMP	0.4376	0	5	HLAMP	4.87964
13	49000001	50000000	5	HLAMP	0.42	0	5	HLAMP	4.79669
13	50000001	51000000	2	NEUT	-0.314	0	2	NEUT	2.10172
13	51000001	52000000	2	NEUT	-0.3577	0	2	NEUT	1.98049
13	53000001	54000000	2	NEUT	-0.3341	0	2	NEUT	2.0455
13	54000001	55000000	2	NEUT	-0.3314	0	2	NEUT	2.05301
13	55000001	56000000	2	NEUT	-0.2449	0	2	NEUT	2.30107
13	56000001	57000000	2	NEUT	-0.2498	0	2	NEUT	2.28662
13	57000001	58000000	2	NEUT	-0.2655	0	2	NEUT	2.24064
13	58000001	59000000	2	NEUT	-0.3086	0	2	NEUT	2.11696
13	59000001	60000000	2	NEUT	-0.3703	0	2	NEUT	1.94621
13	60000001	61000000	2	NEUT	-0.449	0	2	NEUT	1.73874
13	61000001	62000000	2	NEUT	-0.3377	0	2	NEUT	2.03552
13	62000001	63000000	2	NEUT	-0.2226	0	2	NEUT	2.36748
13	63000001	64000000	2	NEUT	NA	0	2	NEUT	NA
13	64000001	65000000	2	NEUT	-0.2228	0	2	NEUT	2.36688
13	65000001	66000000	2	NEUT	-0.2787	0	2	NEUT	2.20237
13	66000001	67000000	2	NEUT	-0.3222	0	2	NEUT	2.07869
13	67000001	68000000	2	NEUT	-0.3348	0	2	NEUT	2.04356
13	68000001	69000000	2	NEUT	NA	0	2	NEUT	NA
13	69000001	70000000	2	NEUT	NA	0	2	NEUT	NA
13	70000001	71000000	2	NEUT	-0.2556	0	2	NEUT	2.26958
13	71000001	72000000	2	NEUT	-0.3487	0	2	NEUT	2.00515
13	72000001	73000000	2	NEUT	-0.3718	0	2	NEUT	1.94215
13	73000001	74000000	2	NEUT	-0.3217	0	2	NEUT	2.08009
13	74000001	75000000	2	NEUT	-0.4221	0	2	NEUT	1.80839
13	75000001	76000000	2	NEUT	-0.3474	0	2	NEUT	2.00873
13	76000001	77000000	2	NEUT	-0.3764	0	2	NEUT	1.92972
13	77000001	78000000	2	NEUT	-0.362	0	2	NEUT	1.96875
13	78000001	79000000	2	NEUT	-0.3948	0	2	NEUT	1.8804
13	79000001	80000000	2	NEUT	-0.4255	0	2	NEUT	1.79951
13	80000001	81000000	2	NEUT	-0.4151	0	2	NEUT	1.82672
13	81000001	82000000	2	NEUT	-0.3364	0	2	NEUT	2.03912
13	82000001	83000000	2	NEUT	-0.2359	0	2	NEUT	2.32775
13	83000001	84000000	2	NEUT	-0.3465	0	2	NEUT	2.01121
13	84000001	85000000	2	NEUT	-0.2715	0	2	NEUT	2.2232
13	85000001	86000000	2	NEUT	-0.25	0	2	NEUT	2.28603
13	87000001	88000000	2	NEUT	-0.3001	0	2	NEUT	2.14106
13	88000001	89000000	2	NEUT	-0.3086	0	2	NEUT	2.11696
13	89000001	90000000	4	AMP	0.144	0	4	AMP	3.61992
13	90000001	91000000	4	AMP	0.2757	0	4	AMP	4.15342
13	91000001	92000000	4	AMP	0.2107	0	4	AMP	3.88403
13	92000001	93000000	4	AMP	0.2316	0	4	AMP	3.96933
13	93000001	94000000	4	AMP	0.2185	0	4	AMP	3.91572
13	94000001	95000000	4	AMP	0.2399	0	4	AMP	4.00355
13	95000001	96000000	4	AMP	0.6323	0	4	AMP	5.8681
13	96000001	97000000	4	AMP	0.63	0	4	AMP	5.85563
13	97000001	98000000	4	AMP	0.6703	0	6	HLAMP	6.07707
13	98000001	99000000	4	AMP	0.7484	0	7	HLAMP	6.52424
13	99000001	100000000	4	AMP	0.2821	0	4	AMP	4.18061
13	100000001	101000000	4	AMP	NA	0	4	AMP	NA
13	101000001	102000000	4	AMP	0.2104	0	4	AMP	3.88281
13	102000001	103000000	4	AMP	0.2199	0	4	AMP	3.92142
13	103000001	104000000	4	AMP	0.2169	0	4	AMP	3.9092
13	104000001	105000000	4	AMP	0.193	0	4	AMP	3.81275
13	105000001	106000000	4	AMP	0.2172	0	4	AMP	3.91042
13	106000001	107000000	4	AMP	0.2427	0	4	AMP	4.01514
13	107000001	108000000	4	AMP	0.1613	0	4	AMP	3.68725
13	108000001	109000000	4	AMP	0.187	0	4	AMP	3.78878
13	109000001	110000000	4	AMP	0.2549	0	4	AMP	4.06589
13	110000001	111000000	4	AMP	0.2789	0	4	AMP	4.167
13	113000001	114000000	4	AMP	NA	0	4	AMP	NA
14	21000001	22000000	3	GAIN	0.0275	1	3	GAIN	3.2232
14	22000001	23000000	3	GAIN	-0.1573	1	3	GAIN	2.58528
14	23000001	24000000	3	GAIN	0.0168	1	3	GAIN	3.18399
14	24000001	25000000	3	GAIN	0.0143	1	3	GAIN	3.17487
14	25000001	26000000	3	GAIN	-0.1412	1	3	GAIN	2.63766
14	26000001	27000000	3	GAIN	-0.0544	1	3	GAIN	2.93038
14	27000001	28000000	3	GAIN	0.0341	1	3	GAIN	3.24753
14	28000001	29000000	3	GAIN	-0.093	1	3	GAIN	2.79803
14	29000001	30000000	3	GAIN	-0.0524	1	3	GAIN	2.93733
14	30000001	31000000	3	GAIN	-0.1182	1	3	GAIN	2.71352
14	31000001	32000000	3	GAIN	-0.0198	1	3	GAIN	3.05206
14	32000001	33000000	3	GAIN	-0.0694	1	3	GAIN	2.87853
14	33000001	34000000	3	GAIN	-0.058	1	3	GAIN	2.91789
14	34000001	35000000	3	GAIN	-0.1318	1	3	GAIN	2.66852
14	35000001	36000000	3	GAIN	0.0776	1	3	GAIN	3.41069
14	36000001	37000000	3	GAIN	-0.0672	1	3	GAIN	2.8861
14	37000001	38000000	3	GAIN	-0.1524	1	3	GAIN	2.60116
14	38000001	39000000	3	GAIN	-0.1086	1	3	GAIN	2.74554
14	39000001	40000000	3	GAIN	-0.0824	1	3	GAIN	2.83402
14	40000001	41000000	3	GAIN	-0.0372	1	3	GAIN	2.9905
14	41000001	42000000	4	AMP	0.1322	0	4	AMP	3.57445
14	42000001	43000000	4	AMP	0.2489	0	4	AMP	4.04088
14	43000001	44000000	4	AMP	0.189	0	4	AMP	3.79676
14	44000001	45000000	4	AMP	0.1547	0	4	AMP	3.66147
14	45000001	46000000	4	AMP	0.2012	0	4	AMP	3.84566
14	46000001	47000000	4	AMP	0.2846	0	4	AMP	4.19126
14	47000001	48000000	4	AMP	0.1885	0	4	AMP	3.79476
14	48000001	49000000	4	AMP	0.2223	0	4	AMP	3.93122
14	49000001	50000000	4	AMP	0.2353	0	4	AMP	3.98456
14	50000001	51000000	4	AMP	0.3373	0	4	AMP	4.42017
14	51000001	52000000	4	AMP	0.2583	0	4	AMP	4.08011
14	52000001	53000000	4	AMP	0.1645	0	4	AMP	3.6998
14	53000001	54000000	3	GAIN	0.0888	1	3	GAIN	3.4535
14	54000001	55000000	3	GAIN	-0.0374	1	3	GAIN	2.9898
14	55000001	56000000	3	GAIN	-0.0147	1	3	GAIN	3.07024
14	56000001	57000000	3	GAIN	-0.095	1	3	GAIN	2.79127
14	57000001	58000000	3	GAIN	-0.1018	1	3	GAIN	2.76835
14	58000001	59000000	3	GAIN	-0.0594	1	3	GAIN	2.91304
14	59000001	60000000	3	GAIN	-0.1105	1	3	GAIN	2.73919
14	60000001	61000000	2	NEUT	-0.4729	0	2	NEUT	1.67795
14	61000001	62000000	2	NEUT	-0.3026	0	2	NEUT	2.13396
14	62000001	63000000	2	NEUT	-0.3605	0	2	NEUT	1.97284
14	63000001	64000000	2	NEUT	-0.3668	0	2	NEUT	1.9557
14	64000001	65000000	2	NEUT	-0.3038	0	2	NEUT	2.13055
14	65000001	66000000	2	NEUT	-0.2792	0	2	NEUT	2.20093
14	66000001	67000000	2	NEUT	-0.4411	0	2	NEUT	1.75906
14	67000001	68000000	2	NEUT	-0.3379	0	2	NEUT	2.03496
14	68000001	69000000	2	NEUT	-0.2868	0	2	NEUT	2.17906
14	69000001	70000000	2	NEUT	-0.2764	0	2	NEUT	2.20901
14	70000001	71000000	2	NEUT	-0.3564	0	2	NEUT	1.98404
14	71000001	72000000	2	NEUT	-0.3452	0	2	NEUT	2.01479
14	72000001	73000000	2	NEUT	-0.3055	0	2	NEUT	2.12573
14	73000001	74000000	2	NEUT	-0.4108	0	2	NEUT	1.83803
14	74000001	75000000	2	NEUT	-0.3623	0	2	NEUT	1.96794
14	75000001	76000000	3	GAIN	-0.0173	0	3	GAIN	3.0295
14	76000001	77000000	3	GAIN	-0.0204	0	3	GAIN	3.01879
14	77000001	78000000	3	GAIN	-0.0163	0	3	GAIN	3.03296
14	78000001	79000000	3	GAIN	-0.0218	0	3	GAIN	3.01396
14	79000001	80000000	3	GAIN	-0.1408	0	3	GAIN	2.62002
14	80000001	81000000	3	GAIN	-0.0593	0	3	GAIN	2.88629
14	81000001	82000000	3	GAIN	0.0067	0	3	GAIN	3.11323
14	82000001	83000000	3	GAIN	-0.0371	0	3	GAIN	2.96147
14	83000001	84000000	3	GAIN	0.0497	0	3	GAIN	3.26676
14	84000001	85000000	3	GAIN	-0.0411	0	3	GAIN	2.94784
14	85000001	86000000	3	GAIN	-0.0837	0	3	GAIN	2.80499
14	86000001	87000000	3	GAIN	-0.1146	0	3	GAIN	2.70399
14	87000001	88000000	3	GAIN	-0.0998	0	3	GAIN	2.7521
14	88000001	89000000	3	GAIN	-0.0496	0	3	GAIN	2.919
14	89000001	90000000	3	GAIN	0.0363	0	3	GAIN	3.21842
14	90000001	91000000	3	GAIN	-0.0043	0	3	GAIN	3.07468
14	91000001	92000000	3	GAIN	0.018	0	3	GAIN	3.15313
14	92000001	93000000	3	GAIN	0.008	0	3	GAIN	3.1178
14	93000001	94000000	3	GAIN	-0.002	0	3	GAIN	3.08271
14	94000001	95000000	3	GAIN	0.0082	0	3	GAIN	3.1185
14	95000001	96000000	3	GAIN	-0.0398	0	3	GAIN	2.95227
14	96000001	97000000	3	GAIN	-0.0121	0	3	GAIN	3.04752
14	97000001	98000000	3	GAIN	-0.0293	0	3	GAIN	2.98816
14	98000001	99000000	3	GAIN	0.0125	0	3	GAIN	3.13367
14	99000001	100000000	3	GAIN	0.0368	0	3	GAIN	3.22022
14	100000001	101000000	3	GAIN	-0.0225	0	3	GAIN	3.01154
14	101000001	102000000	3	GAIN	-0.0925	0	3	GAIN	2.77601
14	102000001	103000000	3	GAIN	0.0838	0	3	GAIN	3.39181
14	103000001	104000000	3	GAIN	0.1039	0	3	GAIN	3.46692
14	104000001	105000000	3	GAIN	-0.2652	0	3	GAIN	2.24152
15	25000001	26000000	4	AMP	0.2606	0	4	AMP	4.08975
15	26000001	27000000	4	AMP	0.2688	0	4	AMP	4.12425
15	27000001	28000000	4	AMP	NA	0	4	AMP	NA
15	31000001	32000000	4	AMP	0.2171	0	4	AMP	3.91002
15	33000001	34000000	4	AMP	0.2493	0	4	AMP	4.04254
15	34000001	35000000	4	AMP	0.2299	0	4	AMP	3.96234
15	35000001	36000000	4	AMP	0.245	0	4	AMP	4.02467
15	36000001	37000000	4	AMP	0.1882	0	4	AMP	3.79357
15	37000001	38000000	2	NEUT	-0.2285	0	2	NEUT	2.34981
15	38000001	39000000	2	NEUT	-0.3529	0	2	NEUT	1.99362
15	39000001	40000000	2	NEUT	-0.3428	0	2	NEUT	2.02141
15	40000001	41000000	2	NEUT	-0.2036	0	2	NEUT	2.42487
15	41000001	42000000	2	NEUT	-0.3174	0	2	NEUT	2.09216
15	42000001	43000000	2	NEUT	-0.3161	0	2	NEUT	2.09581
15	44000001	45000000	2	NEUT	-0.2846	0	2	NEUT	2.18537
15	45000001	46000000	4	AMP	-0.0325	0	4	AMP	2.97719
15	46000001	47000000	4	AMP	0.2078	0	4	AMP	3.87229
15	47000001	48000000	4	AMP	0.2024	0	4	AMP	3.85049
15	48000001	49000000	4	AMP	0.2154	0	4	AMP	3.9031
15	49000001	50000000	4	AMP	0.1712	0	4	AMP	3.72615
15	50000001	51000000	4	AMP	0.2731	0	4	AMP	4.14241
15	51000001	52000000	4	AMP	0.2579	0	4	AMP	4.07844
15	52000001	53000000	4	AMP	0.3246	0	4	AMP	4.36424
15	53000001	54000000	4	AMP	0.1427	0	4	AMP	3.61489
15	54000001	55000000	4	AMP	0.1519	0	4	AMP	3.65057
15	55000001	56000000	4	AMP	0.1879	0	4	AMP	3.79237
15	56000001	57000000	3	GAIN	-0.1255	0	3	GAIN	2.66887
15	57000001	58000000	3	GAIN	-0.0161	0	3	GAIN	3.03366
15	58000001	59000000	3	GAIN	0.0005	0	3	GAIN	3.09146
15	59000001	60000000	3	GAIN	0.0448	0	3	GAIN	3.24903
15	60000001	61000000	3	GAIN	-0.0068	0	3	GAIN	3.06596
15	61000001	62000000	3	GAIN	-0.0605	0	3	GAIN	2.88226
15	62000001	63000000	3	GAIN	-0.0224	0	3	GAIN	3.01189
15	63000001	64000000	3	GAIN	0.0274	0	3	GAIN	3.18656
15	64000001	65000000	3	GAIN	0.0402	0	3	GAIN	3.23244
[truncated: 476 more rows]

## Sheet: Supplementary Data 5
Supplementary Data 5. Size profiles and deconvolution results of cell-free DNA from copy number abbaration regions (SLX-19724.SXTLI189)*
Number of fragments										Size deconvolution results
Sample Size (bp)	Neutral (N=2)	Gain (N=3)	Amplification (N=4)	High-level amplification (N=5)	High-level amplification (N=6)	High-level amplification (N=7)	High-level amplification (N=8)				Center (bp)	Scale (bp)	Amplitude (%)
30	104	103	85	24	17	4	5			Neutral (N=2)	50	3.53593	4.29892e-09
31	140	130	116	16	28	7	6				60	3.53593	0.140326
32	167	185	146	41	17	13	5				70	3.53593	0.36659
33	194	245	187	49	47	15	18				81	2.96707	0.617561
34	288	389	248	60	73	28	18				91	2.96707	0.818521
35	422	435	307	66	77	30	36				101	3.23789	0.798377
36	492	586	491	86	92	30	36				111	3.23789	1.14432
37	684	762	630	120	109	37	55				122	2.25944	1.64369
38	907	963	858	152	176	48	73				133	2.25944	2.62686
39	1160	1241	1013	202	195	83	70				143	4.73114	9.44618
40	1321	1330	1190	241	229	77	72				152	4.73114	8.59415
41	1433	1481	1267	217	258	84	97				159	1.67221	1.42015
42	1675	1716	1464	259	264	135	94				166	5.78408	35.0736
43	1898	2046	1730	306	368	148	130				177	6.97329	27.9638
44	2287	2266	1987	355	391	170	166				188	6.97329	8.81757
45	2626	2764	2309	409	447	161	203				199	6.97329	3.16426
46	3186	3313	2825	510	583	239	226				210	6.97329	1.25946
47	3843	3884	3369	646	703	267	243				221	6.97329	0.256966
48	4881	4844	4540	765	893	335	346			Gain (N=3)	50	3.51071	6.38289e-12
49	6140	5993	5665	933	1163	383	469				60	3.51071	0.167947
50	6820	7024	6564	1082	1267	487	506				70	3.51071	0.386724
51	7364	7411	6731	1130	1351	424	538				81	3.07732	0.662011
52	7702	7387	6954	1133	1387	513	592				91	3.07732	0.890534
53	8231	8207	7654	1197	1480	574	548				101	3.35372	0.869248
54	8858	8965	8251	1342	1627	586	595				111	3.35372	1.23793
55	10071	9807	9142	1470	1841	685	692				122	2.33282	1.76271
56	11327	11068	10117	1666	1982	742	825				133	2.33282	2.87473
57	13209	12646	11896	1894	2415	906	944				143	4.97119	10.6423
58	15653	15168	14211	2237	2895	1033	1178				152	4.97119	9.30948
59	18232	17606	17462	2691	3395	1285	1390				159	1.62448	1.2796
60	19785	19324	18254	2927	3752	1357	1549				166	5.84068	34.3233
61	20265	19386	18773	2976	3561	1379	1571				177	6.94484	26.7709
62	19364	19302	18185	2930	3572	1295	1523				188	6.94484	8.4799
63	19507	19003	18086	2870	3604	1370	1549				199	6.94484	3.04821
64	20026	19450	18670	3027	3746	1392	1599				210	6.94484	1.16722
65	21205	19972	19292	3082	3755	1425	1595				221	6.94484	0.253702
66	21912	20929	20177	3164	3878	1479	1605			Amplification (N=4)	50	3.37744	9.32914e-10
67	23692	21925	21176	3398	4095	1545	1665				60	3.37744	0.145272
68	25460	24788	23916	3777	4789	1782	1799				70	3.37744	0.358834
69	29766	28246	27584	4159	5270	2023	2214				81	3.01139	0.636231
70	32616	31192	30029	4771	5979	2192	2415				91	3.01139	0.89619
71	31511	30142	29373	4490	5819	2205	2371				101	3.37736	0.909171
72	30411	28885	28122	4302	5471	2049	2282				111	3.37736	1.2927
73	30322	28686	28041	4464	5677	2132	2325				122	2.35516	1.83015
74	30986	29506	28357	4304	5674	2174	2351				133	2.35516	3.06082
75	32228	30545	29998	4554	5889	2148	2485				143	5.03652	11.4116
76	33897	31987	30819	4897	6105	2323	2515				152	5.03652	9.79844
77	35133	33362	32748	4995	6390	2345	2702				159	1.55763	1.22357
78	39241	37296	36174	5643	7145	2615	2958				166	5.77032	33.4263
79	46552	43759	43082	6727	8584	3117	3523				177	6.93845	26.4068
80	53875	50391	49379	7449	9725	3651	3987				188	6.93845	8.31893
81	53793	50748	50063	7600	9989	3625	4151				199	6.93845	2.98428
82	46715	43971	43718	6909	8668	3207	3714				210	6.93845	1.17048
83	39645	38475	37974	5989	7554	2776	3328				221	6.93845	0.239104
84	38686	36940	36810	5685	7499	2710	3371			High-level amplification (N=5)	50	3.513	1.65173e-10
85	39113	38065	37665	5843	7665	2902	3231				60	3.513	0.181355
86	40636	39064	38789	6303	7989	3009	3538				70	3.513	0.396108
87	41958	40441	40520	6444	8325	3113	3512				81	3.18695	0.703228
88	45061	44073	43834	6908	8995	3376	3875				91	3.18695	0.993574
89	52914	50452	51254	7878	10616	3949	4589				101	3.44954	0.978217
90	64219	61495	62360	9527	12628	5013	5643				111	3.44954	1.3916
91	72653	68644	69797	10661	14210	5448	6304				122	2.4454	1.97682
92	71064	67551	69137	10506	14421	5320	6366				133	2.4454	3.34776
93	60994	58227	59426	9322	12461	4703	5368				143	5.23194	12.729
94	52138	50436	51321	8039	10886	4064	4719				152	5.23194	10.4683
95	48069	46508	47525	7287	10110	3782	4307				159	1.5424	1.13585
96	46266	44985	45603	7169	9487	3586	4047				166	5.86271	32.7843
97	47612	45960	46208	7183	9613	3506	4293				177	6.95852	25.07
98	51927	48892	49496	7672	10375	3834	4323				188	6.95852	7.86932
99	59243	56413	56684	8792	11632	4335	5039				199	6.95852	2.77576
100	68028	64109	65499	10040	13552	5022	5777				210	6.95852	1.06358
101	74840	70836	72931	11034	15212	5754	6539				221	6.95852	0.219864
102	75931	73517	75724	11756	15893	5930	7055			High-level amplification (N=6)	50	3.30385	1.31005e-10
103	73879	71109	74005	11464	15809	5962	7080				60	3.30385	0.14966
104	68040	66373	69092	10429	14661	5682	6602				70	3.30385	0.351545
105	62739	61153	64027	10000	13325	5142	6131				81	3.07509	0.652269
106	61922	60245	62462	9702	13369	5077	5944				91	3.07509	0.976107
107	64487	61273	62788	9731	13345	5030	5912				101	3.46564	1.02135
108	68201	65379	67035	10223	13931	5136	6202				111	3.46564	1.43221
109	77091	73513	75115	11612	15849	5905	6876				122	2.40579	2.00087
110	91195	86655	89149	13817	18277	6920	8294				133	2.40579	3.49478
111	104495	98838	101535	15550	21349	8240	9419				143	5.23006	13.2832
112	104330	99426	103661	15616	21690	8066	9904				152	5.23006	10.9084
113	92910	88948	91581	14214	19031	7361	8441				159	1.45522	1.12241
114	82745	78809	81877	12641	17088	6603	7672				166	5.70552	31.606
115	80623	77995	80789	12379	16990	6478	7451				177	6.90955	25.0166
116	82597	79485	81734	12738	17015	6399	7462				188	6.90955	7.91786
117	85474	82384	84232	13175	17586	6587	7841				199	6.90955	2.82087
118	90808	87478	89392	13593	18465	7068	8124				210	6.90955	1.08958
119	102663	97523	100463	15653	20549	7839	9217				221	6.90955	0.217967
120	126643	120300	122454	18635	25179	9496	11221			High-level amplification (N=7)	50	3.4666	4.04043e-11
121	159536	151711	154879	23797	32101	11806	14003				60	3.4666	0.148923
122	185152	175057	180152	27563	37388	13968	16606				70	3.4666	0.384303
123	181205	170835	176760	26679	36954	13677	16080				81	2.97609	0.633113
124	148563	142356	147936	22676	31119	11474	14135				91	2.97609	1.00279
125	124845	122518	128773	20235	27626	10358	12521				101	3.51285	1.05286
126	121856	121647	128380	20132	28056	10659	12807				111	3.51285	1.51106
127	129538	130180	137496	22049	30441	11993	14198				122	2.42563	2.00995
128	137690	138082	146878	23582	32263	12574	15280				133	2.42563	3.63279
129	150504	150097	158167	25458	34691	13600	16280				143	5.42802	14.4035
130	173722	171704	179637	28500	38971	15103	17999				152	5.42802	11.3755
131	212044	208015	217748	33977	46966	17983	21424				159	1.40931	0.903512
132	270877	263343	275339	43182	59191	22772	26484				166	5.81591	31.2227
133	325039	314402	329476	50670	71251	27273	32090				177	6.91374	24.2027
134	331761	320285	337682	51995	72388	27483	32867				188	6.91374	7.59151
135	292948	283281	298700	46199	64250	24315	29114				199	6.91374	2.72773
136	255206	249973	262052	41085	56716	21787	26058				210	6.91374	1.13774
137	253071	248018	258815	40897	55967	21514	25481				221	6.91374	0.151461
138	279870	271831	283732	44005	60273	23536	27368			High-level amplification (N=8)	50	3.20385	9.95803e-12
139	327806	314657	326022	50859	68941	26288	30820				60	3.20385	0.14425
140	389419	369957	382271	57912	79899	30201	35171				70	3.20385	0.320401
141	443865	420099	434182	65606	90269	33884	39834				81	3.02767	0.637578
142	472603	449976	467980	71688	98131	37372	43873				91	3.02767	1.02476
143	485207	465440	486980	74943	103629	39447	47031				101	3.47694	1.06722
144	495699	479853	502659	78220	108222	41035	49192				111	3.47694	1.54676
145	498205	482693	507426	78679	109138	41903	49985				122	2.47086	2.14031
146	484735	469652	493784	76649	105506	40126	48075				133	2.47086	3.79772
147	472549	458233	479727	74042	101755	39237	46494				143	5.46481	15.1555
148	481613	462307	480987	73185	100853	38207	45607				152	5.46481	11.9641
149	500820	475622	492276	75192	103294	39173	46164				159	1.35421	0.926291
150	529801	498697	512691	77047	106228	39719	47128				166	5.64738	29.8521
151	567569	526759	540267	81338	110004	40975	47910				177	6.98441	24.1434
152	598771	552001	564005	82816	113573	41631	49220				188	6.98441	7.48459
153	598053	547130	557873	82262	111533	41504	47414				199	6.98441	2.63448
154	573957	526334	530482	78272	105323	38608	44657				210	6.98441	1.07559
155	565478	517934	517635	76365	101579	37030	42781				221	6.98441	0.172358
156	586336	533983	532077	77725	102954	38251	43587
157	634242	571775	570583	82698	110046	40074	45403
158	698153	624364	620683	89633	119224	42775	48887
159	764963	682245	677729	97203	129431	46167	52887
160	823843	730187	723958	103531	137418	49328	55697
161	867152	767393	760154	108001	142218	50778	58271
162	911175	806095	795333	113219	149215	54127	60562
163	994028	878977	863342	123355	162310	57802	65273
164	1125687	992671	978853	138495	182646	64705	73604
165	1246952	1093698	1079704	151316	201507	71989	80769
166	1297494	1135358	1122502	157110	208763	74375	84514
167	1292843	1127813	1116381	155849	207446	73666	83745
168	1262010	1101345	1089624	151556	201280	71261	81009
169	1213740	1062817	1045820	145280	194196	69285	77889
170	1151954	1007272	992200	139023	183485	65372	73754
171	1087798	951666	938932	131145	173261	61894	69340
172	1039492	911339	896229	125468	164939	59466	65956
173	1020128	891577	876781	122482	162276	57827	65086
174	1015966	890600	871987	121819	161540	58060	65029
175	1015607	887248	874360	121443	160482	57262	64137
176	999917	870865	857873	118946	157756	56806	62957
177	957334	834922	821053	113638	152066	53147	60384
178	893514	779402	766517	106183	141047	50034	56283
179	819584	717469	705877	97886	129697	46168	51789
180	751778	654213	641780	89287	118440	42267	47305
181	687380	598516	589527	81562	108817	38655	43224
182	634671	553425	542643	75595	100403	35285	40250
183	592353	516578	506925	70623	93406	33430	37484
184	562692	489770	482479	66275	88155	31312	35676
185	541585	471201	463964	64424	85271	30511	34238
186	522764	455658	447884	62090	82602	29424	33141
187	504123	439354	431307	59899	79342	28248	31695
188	482033	419805	413109	56478	75991	26890	30325
189	452069	394982	388538	53418	71656	25286	28231
190	420011	365401	359110	49855	66403	23337	26280
191	386273	335345	329684	45269	61342	21726	24554
192	354596	307645	303041	41707	55913	19891	22307
193	327648	285260	279778	38401	51880	18387	20721
194	305081	266103	260352	36575	48603	17240	19241
195	287735	249923	246916	33870	45001	16242	18274
196	273033	237751	234344	32354	43301	15224	17108
197	262392	229543	224445	31011	41303	14654	16411
198	251233	218632	213971	29258	39416	14025	15900
199	239588	208490	205839	28556	37905	13327	14922
200	226209	197190	193702	26320	35423	12778	13916
201	211631	184268	181487	25014	33575	11868	13378
202	196118	170860	168865	23002	30615	11113	12415
203	182179	158835	154632	21202	28452	10291	11524
204	169042	146401	144041	19925	26613	9631	10838
205	157791	137398	134740	18775	25012	8799	10038
206	148901	128146	127906	17318	23543	8431	9437
207	141022	122083	120277	16453	22354	7821	8891
208	134664	116054	114408	15443	20773	7601	8511
209	127215	110664	108601	14997	20060	7266	7921
210	119757	103907	103327	14369	18940	6958	7683
211	113163	98582	96459	13250	17607	6531	7195
212	105225	91537	90750	12522	16404	5779	6652
213	98232	84741	83835	11451	15342	5645	6040
214	91069	78742	78151	10569	14686	5052	5852
215	84181	73791	72223	9885	13319	4699	5287
216	78988	68561	67057	9393	12568	4464	5072
217	74044	64523	63010	8930	11677	4219	4636
218	70145	61338	60065	8474	11408	3981	4478
219	66883	57743	57304	7712	10280	3695	4347
220	62908	55092	54769	7479	9927	3458	4046
221	59810	52147	51153	6905	9543	3355	3778
222	55409	48667	47769	6629	8930	3164	3526
223	52300	45110	44968	6138	8049	2850	3313
224	48369	42373	41890	5887	7599	2805	3118
225	45548	39689	39017	5471	7028	2540	2925
226	42294	37408	36123	5185	6803	2330	2688
227	40591	35327	34492	4846	6485	2343	2530
228	37874	33054	32747	4501	6094	2105	2442
229	36165	31932	31580	4325	5665	2083	2356
230	34360	30282	29675	4237	5545	1942	2194
231	32577	28727	28240	3962	5184	1878	2079
232	31230	27704	26990	3761	4849	1808	2037
233	29583	25771	25507	3565	4669	1746	1894
234	27517	24939	24602	3400	4382	1611	1851
235	26423	23535	22946	3259	4154	1596	1590
236	25192	22390	21704	3177	3986	1462	1644
237	24118	21279	20790	2985	3953	1301	1546
238	23251	21078	19995	2895	3614	1271	1526
239	22544	20118	19702	2876	3640	1295	1433
240	21933	19595	19349	2877	3487	1271	1420
241	21374	19067	18444	2656	3458	1245	1373
242	20966	18558	18205	2679	3301	1198	1247
243	20087	18161	17428	2549	3316	1171	1373
244	19965	17557	16985	2623	3273	1072	1261
245	18898	17180	16585	2515	3067	1106	1184
246	18581	16333	16588	2361	3109	1125	1192
247	18285	16455	15918	2428	2911	1102	1183
248	17905	16367	15559	2404	2940	1077	1194
249	17819	15844	15253	2370	3000	1082	1130
250	17198	16160	15578	2290	2951	1064	1241

## Sheet: Supplementary Data 6
Supplementary Data 6. Deconvolution results of cell-free DNA from individuals with germline TP53 mutation*
Group	Sample ID	Center (bp)	Scale (bp)	Amplitude (%)
Healthy	TGL49_0196_Ct_T_PE_321_WG	60.92	3.41	0.369281
Healthy	TGL49_0196_Ct_T_PE_321_WG	70.61	3.41	0.443489
Healthy	TGL49_0196_Ct_T_PE_321_WG	80.85	2.79	0.702623
Healthy	TGL49_0196_Ct_T_PE_321_WG	91.54	2.79	0.87167
Healthy	TGL49_0196_Ct_T_PE_321_WG	102.04	3.33	0.891688
Healthy	TGL49_0196_Ct_T_PE_321_WG	111.94	3.33	1.22129
Healthy	TGL49_0196_Ct_T_PE_321_WG	122.56	2.44	1.28096
Healthy	TGL49_0196_Ct_T_PE_321_WG	133.83	2.44	1.34679
Healthy	TGL49_0196_Ct_T_PE_321_WG	143.27	4.8	6.06694
Healthy	TGL49_0196_Ct_T_PE_321_WG	152.47	4.8	6.68947
Healthy	TGL49_0196_Ct_T_PE_321_WG	160.18	3.14	2.68417
Healthy	TGL49_0196_Ct_T_PE_321_WG	167.71	6.96	40.207
Healthy	TGL49_0196_Ct_T_PE_321_WG	177.77	6.79	23.8632
Healthy	TGL49_0196_Ct_T_PE_321_WG	188.44	6.79	10.7848
Healthy	TGL49_0196_Ct_T_PE_321_WG	198.57	6.79	4.61933
Healthy	TGL49_0196_Ct_T_PE_321_WG	208.93	6.79	1.8726
Healthy	TGL49_0196_Ct_T_PE_321_WG	220.89	6.79	0.586835
Healthy	TGL49_0197_Ct_T_PE_318_WG	60.57	2.2	0.281017
Healthy	TGL49_0197_Ct_T_PE_318_WG	70.27	2.2	0.286689
Healthy	TGL49_0197_Ct_T_PE_318_WG	80.78	2.34	0.656212
Healthy	TGL49_0197_Ct_T_PE_318_WG	91.46	2.34	0.883099
Healthy	TGL49_0197_Ct_T_PE_318_WG	102.03	3.06	1.04868
Healthy	TGL49_0197_Ct_T_PE_318_WG	111.81	3.06	1.33842
Healthy	TGL49_0197_Ct_T_PE_318_WG	122.68	2.19	1.38436
Healthy	TGL49_0197_Ct_T_PE_318_WG	133.93	2.19	1.6449
Healthy	TGL49_0197_Ct_T_PE_318_WG	143.56	4.81	8.1229
Healthy	TGL49_0197_Ct_T_PE_318_WG	152.88	4.81	7.9193
Healthy	TGL49_0197_Ct_T_PE_318_WG	160.01	2.83	2.15356
Healthy	TGL49_0197_Ct_T_PE_318_WG	167.33	6.95	39.9584
Healthy	TGL49_0197_Ct_T_PE_318_WG	177.09	7.59	25.7499
Healthy	TGL49_0197_Ct_T_PE_318_WG	188.67	7.59	8.59151
Healthy	TGL49_0197_Ct_T_PE_318_WG	199.94	7.59	3.12188
Healthy	TGL49_0197_Ct_T_PE_318_WG	210.28	7.59	1.17707
Healthy	TGL49_0197_Ct_T_PE_318_WG	221	7.59	0.325253
Healthy	TGL49_0198_Ct_T_PE_318_WG	62	3.35	0.0515019
Healthy	TGL49_0198_Ct_T_PE_318_WG	70.69	3.35	0.270895
Healthy	TGL49_0198_Ct_T_PE_318_WG	81.07	2.67	0.502365
Healthy	TGL49_0198_Ct_T_PE_318_WG	91.93	2.67	0.670139
Healthy	TGL49_0198_Ct_T_PE_318_WG	102.25	3.41	0.805017
Healthy	TGL49_0198_Ct_T_PE_318_WG	112.18	3.41	1.05211
Healthy	TGL49_0198_Ct_T_PE_318_WG	122.77	2.13	1.15341
Healthy	TGL49_0198_Ct_T_PE_318_WG	134.06	2.13	1.25642
Healthy	TGL49_0198_Ct_T_PE_318_WG	143.78	4.89	6.9632
Healthy	TGL49_0198_Ct_T_PE_318_WG	152.72	4.89	7.12362
Healthy	TGL49_0198_Ct_T_PE_318_WG	159.99	3.33	3.03914
Healthy	TGL49_0198_Ct_T_PE_318_WG	167.73	6.84	38.6795
Healthy	TGL49_0198_Ct_T_PE_318_WG	177.48	7.04	26.901
Healthy	TGL49_0198_Ct_T_PE_318_WG	188.44	7.04	10.6781
Healthy	TGL49_0198_Ct_T_PE_318_WG	198.8	7.04	3.99635
Healthy	TGL49_0198_Ct_T_PE_318_WG	208.85	7.04	1.42443
Healthy	TGL49_0198_Ct_T_PE_318_WG	217	7.04	0.142922
Healthy	TGL49_0199_Ct_T_PE_315_WG	60.8	2.07	0.038135
Healthy	TGL49_0199_Ct_T_PE_315_WG	70.28	2.07	0.12087
Healthy	TGL49_0199_Ct_T_PE_315_WG	80.9	2.23	0.324491
Healthy	TGL49_0199_Ct_T_PE_315_WG	91.69	2.23	0.453843
Healthy	TGL49_0199_Ct_T_PE_315_WG	102.11	2.89	0.58622
Healthy	TGL49_0199_Ct_T_PE_315_WG	111.78	2.89	0.772039
Healthy	TGL49_0199_Ct_T_PE_315_WG	122.68	2	0.8724
Healthy	TGL49_0199_Ct_T_PE_315_WG	134.02	2	1.1099
Healthy	TGL49_0199_Ct_T_PE_315_WG	143.53	4.68	6.82984
Healthy	TGL49_0199_Ct_T_PE_315_WG	152.62	4.68	7.30086
Healthy	TGL49_0199_Ct_T_PE_315_WG	160.03	3.14	3.06933
Healthy	TGL49_0199_Ct_T_PE_315_WG	167.62	6.74	41.3081
Healthy	TGL49_0199_Ct_T_PE_315_WG	177.47	7.36	27.1319
Healthy	TGL49_0199_Ct_T_PE_315_WG	188.83	7.36	9.83255
Healthy	TGL49_0199_Ct_T_PE_315_WG	199.88	7.36	3.32833
Healthy	TGL49_0199_Ct_T_PE_315_WG	210.11	7.36	1.23444
Healthy	TGL49_0199_Ct_T_PE_315_WG	221	7.36	0.316151
Healthy	TGL49_0200_Ct_T_PE_316_WG	61.18	2.49	0.12408
Healthy	TGL49_0200_Ct_T_PE_316_WG	70.64	2.49	0.202052
Healthy	TGL49_0200_Ct_T_PE_316_WG	81.01	2.44	0.484994
Healthy	TGL49_0200_Ct_T_PE_316_WG	91.8	2.44	0.701327
Healthy	TGL49_0200_Ct_T_PE_316_WG	102.07	3.11	0.810507
Healthy	TGL49_0200_Ct_T_PE_316_WG	111.97	3.11	1.11702
Healthy	TGL49_0200_Ct_T_PE_316_WG	122.78	2.09	1.31111
Healthy	TGL49_0200_Ct_T_PE_316_WG	134.02	2.09	1.56313
Healthy	TGL49_0200_Ct_T_PE_316_WG	143.43	4.99	8.69006
Healthy	TGL49_0200_Ct_T_PE_316_WG	152.73	4.99	8.53298
Healthy	TGL49_0200_Ct_T_PE_316_WG	159.88	3	3.04999
Healthy	TGL49_0200_Ct_T_PE_316_WG	167.35	6.47	39.8007
Healthy	TGL49_0200_Ct_T_PE_316_WG	177.14	7.45	25.7667
Healthy	TGL49_0200_Ct_T_PE_316_WG	188.77	7.45	8.24897
Healthy	TGL49_0200_Ct_T_PE_316_WG	200.18	7.45	2.70663
Healthy	TGL49_0200_Ct_T_PE_316_WG	210.21	7.45	0.987298
Healthy	TGL49_0200_Ct_T_PE_316_WG	221	7.45	0.3312
Healthy	TGL49_0201_Ct_T_PE_318_WG	61.86	7.31	4.14966e-11
Healthy	TGL49_0201_Ct_T_PE_318_WG	70.8	7.31	0.00489539
Healthy	TGL49_0201_Ct_T_PE_318_WG	81.08	2	0.17104
Healthy	TGL49_0201_Ct_T_PE_318_WG	92.03	2	0.296475
Healthy	TGL49_0201_Ct_T_PE_318_WG	102.17	2.71	0.38181
Healthy	TGL49_0201_Ct_T_PE_318_WG	111.72	2.71	0.42879
Healthy	TGL49_0201_Ct_T_PE_318_WG	122.62	2	0.573712
Healthy	TGL49_0201_Ct_T_PE_318_WG	134.15	2	0.705949
Healthy	TGL49_0201_Ct_T_PE_318_WG	143.6	4.64	5.35494
Healthy	TGL49_0201_Ct_T_PE_318_WG	152.44	4.64	6.78285
Healthy	TGL49_0201_Ct_T_PE_318_WG	159.69	2.77	2.79124
Healthy	TGL49_0201_Ct_T_PE_318_WG	167.63	6.41	46.1849
Healthy	TGL49_0201_Ct_T_PE_318_WG	177.24	6.4	29.2205
Healthy	TGL49_0201_Ct_T_PE_318_WG	187.9	6.4	9.51884
Healthy	TGL49_0201_Ct_T_PE_318_WG	199.37	6.4	2.3193
Healthy	TGL49_0201_Ct_T_PE_318_WG	207	6.4	0.167188
Healthy	TGL49_0201_Ct_T_PE_318_WG	219.09	6.4	1.10799e-05
Healthy	TGL49_0256_Ct_n_PE_395_WG	62	5.83	2.31397e-11
Healthy	TGL49_0256_Ct_n_PE_395_WG	71.26	5.83	1.03596e-09
Healthy	TGL49_0256_Ct_n_PE_395_WG	81.62	2	0.101365
Healthy	TGL49_0256_Ct_n_PE_395_WG	92.32	2	0.230103
Healthy	TGL49_0256_Ct_n_PE_395_WG	102.51	2.47	0.324964
Healthy	TGL49_0256_Ct_n_PE_395_WG	111.93	2.47	0.394739
Healthy	TGL49_0256_Ct_n_PE_395_WG	122.8	2	0.626119
Healthy	TGL49_0256_Ct_n_PE_395_WG	134.27	2	1.07481
Healthy	TGL49_0256_Ct_n_PE_395_WG	143.69	4.93	6.88287
Healthy	TGL49_0256_Ct_n_PE_395_WG	152.77	4.93	6.81395
Healthy	TGL49_0256_Ct_n_PE_395_WG	159.63	2.42	1.55745
Healthy	TGL49_0256_Ct_n_PE_395_WG	167.61	7.23	50.4971
Healthy	TGL49_0256_Ct_n_PE_395_WG	177.42	7.01	25.0237
Healthy	TGL49_0256_Ct_n_PE_395_WG	188.47	7.01	8.28767
Healthy	TGL49_0256_Ct_n_PE_395_WG	200.19	7.01	2.7563
Healthy	TGL49_0256_Ct_n_PE_395_WG	209.72	7.01	0.768515
Healthy	TGL49_0256_Ct_n_PE_395_WG	220.14	7.01	6.56497e-12
Healthy	TGL49_0257_Ct_n_PE_387_WG	61.38	5.46	3.17524e-14
Healthy	TGL49_0257_Ct_n_PE_387_WG	70.32	5.46	6.98575e-12
Healthy	TGL49_0257_Ct_n_PE_387_WG	81.46	2	0.0522813
Healthy	TGL49_0257_Ct_n_PE_387_WG	92.32	2	0.179778
Healthy	TGL49_0257_Ct_n_PE_387_WG	102.47	2.52	0.262237
Healthy	TGL49_0257_Ct_n_PE_387_WG	111.86	2.52	0.335994
Healthy	TGL49_0257_Ct_n_PE_387_WG	122.8	2	0.498498
Healthy	TGL49_0257_Ct_n_PE_387_WG	134.37	2	0.851464
Healthy	TGL49_0257_Ct_n_PE_387_WG	143.69	4.63	5.61941
Healthy	TGL49_0257_Ct_n_PE_387_WG	151.96	4.63	5.38905
Healthy	TGL49_0257_Ct_n_PE_387_WG	160.38	6.77	11.2657
Healthy	TGL49_0257_Ct_n_PE_387_WG	167.98	5.98	36.1836
Healthy	TGL49_0257_Ct_n_PE_387_WG	177.01	7.07	31.4568
Healthy	TGL49_0257_Ct_n_PE_387_WG	188.08	7.07	9.59575
Healthy	TGL49_0257_Ct_n_PE_387_WG	199.3	7.07	2.68521
Healthy	TGL49_0257_Ct_n_PE_387_WG	207.58	7.07	0.781334
Healthy	TGL49_0257_Ct_n_PE_387_WG	217	7.07	3.4735e-09
Healthy	TGL49_0258_Ct_n_PE_356_WG	61.74	2	1.60427e-12
Healthy	TGL49_0258_Ct_n_PE_356_WG	69.5	2	9.01057e-13
Healthy	TGL49_0258_Ct_n_PE_356_WG	81.19	2	2.52243e-13
Healthy	TGL49_0258_Ct_n_PE_356_WG	92.58	2	0.0519327
Healthy	TGL49_0258_Ct_n_PE_356_WG	102.25	2	0.105207
Healthy	TGL49_0258_Ct_n_PE_356_WG	111.39	2	0.0910796
Healthy	TGL49_0258_Ct_n_PE_356_WG	122.63	2.04	0.203427
Healthy	TGL49_0258_Ct_n_PE_356_WG	134.44	2.04	0.56424
Healthy	TGL49_0258_Ct_n_PE_356_WG	143.69	3.75	4.09359
Healthy	TGL49_0258_Ct_n_PE_356_WG	152.14	3.75	3.8089
Healthy	TGL49_0258_Ct_n_PE_356_WG	161	8	15.2035
Healthy	TGL49_0258_Ct_n_PE_356_WG	168.11	5.84	34.435
Healthy	TGL49_0258_Ct_n_PE_356_WG	177.18	7.13	33.4894
Healthy	TGL49_0258_Ct_n_PE_356_WG	188.34	7.13	10.5292
Healthy	TGL49_0258_Ct_n_PE_356_WG	200.09	7.13	2.82044
Healthy	TGL49_0258_Ct_n_PE_356_WG	207.31	7.13	0.347266
Healthy	TGL49_0258_Ct_n_PE_356_WG	217.5	7.13	8.65974e-15
Healthy	TGL49_0259_Ct_n_PE_372_WG	61.99	2.92	9.21334e-08
Healthy	TGL49_0259_Ct_n_PE_372_WG	69.57	2.92	5.43476e-12
Healthy	TGL49_0259_Ct_n_PE_372_WG	81.56	2	0.0568265
Healthy	TGL49_0259_Ct_n_PE_372_WG	92.36	2	0.20882
Healthy	TGL49_0259_Ct_n_PE_372_WG	102.53	2.64	0.329318
Healthy	TGL49_0259_Ct_n_PE_372_WG	111.78	2.64	0.391826
Healthy	TGL49_0259_Ct_n_PE_372_WG	122.73	2.01	0.524107
Healthy	TGL49_0259_Ct_n_PE_372_WG	134.3	2.01	1.0048
Healthy	TGL49_0259_Ct_n_PE_372_WG	143.63	4.92	7.25584
Healthy	TGL49_0259_Ct_n_PE_372_WG	152.66	4.92	7.84037
Healthy	TGL49_0259_Ct_n_PE_372_WG	159.75	3.3	3.38325
Healthy	TGL49_0259_Ct_n_PE_372_WG	167.46	6.56	47.4486
Healthy	TGL49_0259_Ct_n_PE_372_WG	176.9	7.11	26.5796
Healthy	TGL49_0259_Ct_n_PE_372_WG	188.19	7.11	7.42829
Healthy	TGL49_0259_Ct_n_PE_372_WG	199.89	7.11	2.16899
Healthy	TGL49_0259_Ct_n_PE_372_WG	208.28	7.11	0.464348
Healthy	TGL49_0259_Ct_n_PE_372_WG	217.01	7.11	9.45155e-12
Healthy	TGL49_0260_Ct_n_PE_367_WG	61.42	2.78	1.9984e-14
Healthy	TGL49_0260_Ct_n_PE_367_WG	70.42	2.78	1.45972e-12
Healthy	TGL49_0260_Ct_n_PE_367_WG	81.95	2	0.0955124
Healthy	TGL49_0260_Ct_n_PE_367_WG	92.32	2	0.251989
Healthy	TGL49_0260_Ct_n_PE_367_WG	102.56	2.93	0.446932
Healthy	TGL49_0260_Ct_n_PE_367_WG	111.91	2.93	0.558824
Healthy	TGL49_0260_Ct_n_PE_367_WG	122.76	2	0.73203
Healthy	TGL49_0260_Ct_n_PE_367_WG	134.22	2	1.25653
Healthy	TGL49_0260_Ct_n_PE_367_WG	143.63	5.24	8.32949
Healthy	TGL49_0260_Ct_n_PE_367_WG	152.75	5.24	8.40619
Healthy	TGL49_0260_Ct_n_PE_367_WG	159.69	2.82	2.31768
Healthy	TGL49_0260_Ct_n_PE_367_WG	167.51	6.96	49.6882
Healthy	TGL49_0260_Ct_n_PE_367_WG	177.13	6.83	23.2711
Healthy	TGL49_0260_Ct_n_PE_367_WG	187.97	6.83	7.04666
Healthy	TGL49_0260_Ct_n_PE_367_WG	199.33	6.83	2.13066
Healthy	TGL49_0260_Ct_n_PE_367_WG	207.73	6.83	0.610064
Healthy	TGL49_0260_Ct_n_PE_367_WG	218.06	6.83	4.31433e-13
Healthy	TGL49_0261_Ct_n_PE_487_WG	61.85	4.48	2.74603e-12
Healthy	TGL49_0261_Ct_n_PE_487_WG	68.5	4.48	1.78901e-12
Healthy	TGL49_0261_Ct_n_PE_487_WG	81.38	2	0.0659374
Healthy	TGL49_0261_Ct_n_PE_487_WG	92.28	2	0.253031
Healthy	TGL49_0261_Ct_n_PE_487_WG	102.46	2.72	0.393777
Healthy	TGL49_0261_Ct_n_PE_487_WG	111.89	2.72	0.503811
Healthy	TGL49_0261_Ct_n_PE_487_WG	122.86	2	0.801341
Healthy	TGL49_0261_Ct_n_PE_487_WG	134.24	2	1.47309
Healthy	TGL49_0261_Ct_n_PE_487_WG	143.62	5.25	9.21348
Healthy	TGL49_0261_Ct_n_PE_487_WG	152.71	5.25	9.31323
Healthy	TGL49_0261_Ct_n_PE_487_WG	159.75	3.17	3.39109
Healthy	TGL49_0261_Ct_n_PE_487_WG	167.39	6.47	47.816
Healthy	TGL49_0261_Ct_n_PE_487_WG	176.78	6.98	24.1067
Healthy	TGL49_0261_Ct_n_PE_487_WG	187.74	6.98	5.88291
Healthy	TGL49_0261_Ct_n_PE_487_WG	199.69	6.98	1.6568
Healthy	TGL49_0261_Ct_n_PE_487_WG	207	6.98	0.184663
Healthy	TGL49_0261_Ct_n_PE_487_WG	217.56	6.98	1.07669e-07
Healthy	TGL49_0262_Ct_n_PE_360_WG	61.37	3.73	7.39695e-08
Healthy	TGL49_0262_Ct_n_PE_360_WG	68.35	3.73	4.69434e-10
Healthy	TGL49_0262_Ct_n_PE_360_WG	81.32	2.01	0.0835525
Healthy	TGL49_0262_Ct_n_PE_360_WG	92.36	2.01	0.231725
Healthy	TGL49_0262_Ct_n_PE_360_WG	102.29	2.62	0.364294
Healthy	TGL49_0262_Ct_n_PE_360_WG	111.54	2.62	0.40095
Healthy	TGL49_0262_Ct_n_PE_360_WG	122.69	2	0.51615
Healthy	TGL49_0262_Ct_n_PE_360_WG	134.28	2	0.927662
Healthy	TGL49_0262_Ct_n_PE_360_WG	143.69	4.66	6.44214
Healthy	TGL49_0262_Ct_n_PE_360_WG	152.87	4.66	7.34271
Healthy	TGL49_0262_Ct_n_PE_360_WG	159.87	2.07	1.6078
Healthy	TGL49_0262_Ct_n_PE_360_WG	167.39	6.96	47.694
Healthy	TGL49_0262_Ct_n_PE_360_WG	177.26	7.12	27.2265
Healthy	TGL49_0262_Ct_n_PE_360_WG	188.54	7.12	9.31284
Healthy	TGL49_0262_Ct_n_PE_360_WG	200.2	7.12	2.86788
Healthy	TGL49_0262_Ct_n_PE_360_WG	208.63	7.12	0.450525
Healthy	TGL49_0262_Ct_n_PE_360_WG	218.51	7.12	1.79421e-05
Healthy	TGL49_0263_Ct_n_PE_366_WG	58.06	5.55	1.0661e-11
Healthy	TGL49_0263_Ct_n_PE_366_WG	69.88	5.55	3.86802e-13
Healthy	TGL49_0263_Ct_n_PE_366_WG	79.33	3.39	2.74879e-06
Healthy	TGL49_0263_Ct_n_PE_366_WG	92.8	3.39	0.0898018
Healthy	TGL49_0263_Ct_n_PE_366_WG	103.98	3.41	0.171104
Healthy	TGL49_0263_Ct_n_PE_366_WG	110.96	3.41	0.275844
Healthy	TGL49_0263_Ct_n_PE_366_WG	122.81	2.01	0.474146
Healthy	TGL49_0263_Ct_n_PE_366_WG	134.31	2.01	0.885917
Healthy	TGL49_0263_Ct_n_PE_366_WG	143.8	4.55	5.82383
Healthy	TGL49_0263_Ct_n_PE_366_WG	152.99	4.55	6.61656
Healthy	TGL49_0263_Ct_n_PE_366_WG	160.34	2.94	2.5727
Healthy	TGL49_0263_Ct_n_PE_366_WG	167.78	6.98	42.5906
Healthy	TGL49_0263_Ct_n_PE_366_WG	177.69	7.4	29.2841
Healthy	TGL49_0263_Ct_n_PE_366_WG	188.81	7.4	11.6533
Healthy	TGL49_0263_Ct_n_PE_366_WG	199.91	7.4	3.90105
Healthy	TGL49_0263_Ct_n_PE_366_WG	209.17	7.4	1.29657
Healthy	TGL49_0263_Ct_n_PE_366_WG	220.99	7.4	3.84441e-06
Healthy	TGL49_0264_Pb_U_PE_380_WG	62	2.88	4.90608e-12
Healthy	TGL49_0264_Pb_U_PE_380_WG	68.68	2.88	1.73883e-12
Healthy	TGL49_0264_Pb_U_PE_380_WG	81.38	2	0.0926994
Healthy	TGL49_0264_Pb_U_PE_380_WG	92.25	2	0.260366
Healthy	TGL49_0264_Pb_U_PE_380_WG	102.34	2.71	0.371923
Healthy	TGL49_0264_Pb_U_PE_380_WG	111.88	2.71	0.505076
Healthy	TGL49_0264_Pb_U_PE_380_WG	122.78	2	0.761108
Healthy	TGL49_0264_Pb_U_PE_380_WG	134.19	2	1.00981
Healthy	TGL49_0264_Pb_U_PE_380_WG	143.63	4.67	6.32931
Healthy	TGL49_0264_Pb_U_PE_380_WG	152.55	4.67	7.04255
Healthy	TGL49_0264_Pb_U_PE_380_WG	159.95	3.32	3.47925
Healthy	TGL49_0264_Pb_U_PE_380_WG	167.67	6.37	42.4929
Healthy	TGL49_0264_Pb_U_PE_380_WG	177.24	6.79	29.867
Healthy	TGL49_0264_Pb_U_PE_380_WG	188.18	6.79	9.74457
Healthy	TGL49_0264_Pb_U_PE_380_WG	199.41	6.79	2.57001
Healthy	TGL49_0264_Pb_U_PE_380_WG	207.36	6.79	0.483215
Healthy	TGL49_0264_Pb_U_PE_380_WG	217	6.79	2.75002e-12
Healthy	TGL49_0265_Pb_U_PE_382_WG	58.18	2.07	5.69775e-10
Healthy	TGL49_0265_Pb_U_PE_382_WG	71.77	2.07	2.37481e-07
Healthy	TGL49_0265_Pb_U_PE_382_WG	81.49	6.7	0.000718766
Healthy	TGL49_0265_Pb_U_PE_382_WG	92.24	6.7	0.0955607
Healthy	TGL49_0265_Pb_U_PE_382_WG	102.6	8	0.381399
Healthy	TGL49_0265_Pb_U_PE_382_WG	112.4	8	0.466411
Healthy	TGL49_0265_Pb_U_PE_382_WG	122.77	2.01	0.32937
Healthy	TGL49_0265_Pb_U_PE_382_WG	134.24	2.01	0.692203
Healthy	TGL49_0265_Pb_U_PE_382_WG	143.59	4.32	4.73658
Healthy	TGL49_0265_Pb_U_PE_382_WG	152.32	4.32	5.44983
Healthy	TGL49_0265_Pb_U_PE_382_WG	161	5.35	7.85439
Healthy	TGL49_0265_Pb_U_PE_382_WG	168.22	6.33	34.9037
Healthy	TGL49_0265_Pb_U_PE_382_WG	177.63	7.39	31.5965
Healthy	TGL49_0265_Pb_U_PE_382_WG	188.91	7.39	12.7166
Healthy	TGL49_0265_Pb_U_PE_382_WG	200.11	7.39	4.46991
Healthy	TGL49_0265_Pb_U_PE_382_WG	210.45	7.39	1.48983
Healthy	TGL49_0265_Pb_U_PE_382_WG	217.3	7.39	0.0949449
Healthy	TGL49_0266_Pb_U_PE_412_WG	60.92	2	5.34017e-13
Healthy	TGL49_0266_Pb_U_PE_412_WG	70.89	2	0.0280004
Healthy	TGL49_0266_Pb_U_PE_412_WG	81.09	2.13	0.174365
Healthy	TGL49_0266_Pb_U_PE_412_WG	92.09	2.13	0.337984
Healthy	TGL49_0266_Pb_U_PE_412_WG	102.22	3.07	0.445178
Healthy	TGL49_0266_Pb_U_PE_412_WG	111.9	3.07	0.57858
Healthy	TGL49_0266_Pb_U_PE_412_WG	122.75	2	0.732116
Healthy	TGL49_0266_Pb_U_PE_412_WG	134.15	2	0.950653
Healthy	TGL49_0266_Pb_U_PE_412_WG	143.6	4.81	6.02211
Healthy	TGL49_0266_Pb_U_PE_412_WG	152.45	4.81	7.13844
Healthy	TGL49_0266_Pb_U_PE_412_WG	159.93	3.6	3.95905
Healthy	TGL49_0266_Pb_U_PE_412_WG	167.61	6.23	41.587
Healthy	TGL49_0266_Pb_U_PE_412_WG	176.94	6.91	31.7202
Healthy	TGL49_0266_Pb_U_PE_412_WG	187.81	6.91	8.89453
Healthy	TGL49_0266_Pb_U_PE_412_WG	199.41	6.91	1.93171
Healthy	TGL49_0266_Pb_U_PE_412_WG	207	6.91	0.285059
Healthy	TGL49_0266_Pb_U_PE_412_WG	219.94	6.91	8.33711e-12
Healthy	TGL49_0267_Cf_R_PE_371_WG	61.25	2	5.0937e-12
Healthy	TGL49_0267_Cf_R_PE_371_WG	70.99	2	0.0484778
Healthy	TGL49_0267_Cf_R_PE_371_WG	81.49	2.24	0.260427
Healthy	TGL49_0267_Cf_R_PE_371_WG	92.12	2.24	0.381369
Healthy	TGL49_0267_Cf_R_PE_371_WG	102.33	3.53	0.615934
Healthy	TGL49_0267_Cf_R_PE_371_WG	112.12	3.53	0.812734
Healthy	TGL49_0267_Cf_R_PE_371_WG	122.73	2	0.814569
Healthy	TGL49_0267_Cf_R_PE_371_WG	134.08	2	1.05
Healthy	TGL49_0267_Cf_R_PE_371_WG	143.65	5.21	7.5897
Healthy	TGL49_0267_Cf_R_PE_371_WG	152.57	5.21	8.21021
Healthy	TGL49_0267_Cf_R_PE_371_WG	159.84	3.24	3.11057
Healthy	TGL49_0267_Cf_R_PE_371_WG	167.52	6.65	45.9896
Healthy	TGL49_0267_Cf_R_PE_371_WG	177.01	6.82	26.1926
Healthy	TGL49_0267_Cf_R_PE_371_WG	187.92	6.82	7.76107
Healthy	TGL49_0267_Cf_R_PE_371_WG	199.47	6.82	2.04779
Healthy	TGL49_0267_Cf_R_PE_371_WG	207	6.82	0.0366923
Healthy	TGL49_0267_Cf_R_PE_371_WG	217	6.82	1.14997e-12
Healthy	TGL49_0267_Pb_U_PE_428_WG	62	2.32	5.10288e-06
Healthy	TGL49_0267_Pb_U_PE_428_WG	71.99	2.32	0.0037286
Healthy	TGL49_0267_Pb_U_PE_428_WG	81.14	2.09	0.171419
Healthy	TGL49_0267_Pb_U_PE_428_WG	92.14	2.09	0.248197
Healthy	TGL49_0267_Pb_U_PE_428_WG	102.32	2.77	0.329759
Healthy	TGL49_0267_Pb_U_PE_428_WG	111.92	2.77	0.434155
Healthy	TGL49_0267_Pb_U_PE_428_WG	122.61	2	0.572141
Healthy	TGL49_0267_Pb_U_PE_428_WG	134.16	2	0.776789
Healthy	TGL49_0267_Pb_U_PE_428_WG	143.77	4.69	5.58174
Healthy	TGL49_0267_Pb_U_PE_428_WG	152.72	4.69	6.16868
Healthy	TGL49_0267_Pb_U_PE_428_WG	159.99	3.14	2.80401
Healthy	TGL49_0267_Pb_U_PE_428_WG	167.6	6.59	40.0862
Healthy	TGL49_0267_Pb_U_PE_428_WG	177.22	7.27	30.9227
Healthy	TGL49_0267_Pb_U_PE_428_WG	188.6	7.27	11.6023
Healthy	TGL49_0267_Pb_U_PE_428_WG	199.88	7.27	3.96652
Healthy	TGL49_0267_Pb_U_PE_428_WG	210.11	7.27	1.35308
Healthy	TGL49_0267_Pb_U_PE_428_WG	219.29	7.27	3.48325e-07
Healthy	TGL49_0301_Cf_R_PE_382_WG	61.48	3.2	1.85518e-12
Healthy	TGL49_0301_Cf_R_PE_382_WG	70.1	3.2	5.55227e-11
Healthy	TGL49_0301_Cf_R_PE_382_WG	81.46	2	0.0790947
Healthy	TGL49_0301_Cf_R_PE_382_WG	92.24	2	0.169009
Healthy	TGL49_0301_Cf_R_PE_382_WG	102.4	2.31	0.2259
Healthy	TGL49_0301_Cf_R_PE_382_WG	111.78	2.31	0.283323
Healthy	TGL49_0301_Cf_R_PE_382_WG	122.56	2	0.381653
Healthy	TGL49_0301_Cf_R_PE_382_WG	134.3	2	0.503822
Healthy	TGL49_0301_Cf_R_PE_382_WG	143.9	4.15	3.88492
Healthy	TGL49_0301_Cf_R_PE_382_WG	152.44	4.15	4.44073
Healthy	TGL49_0301_Cf_R_PE_382_WG	159.72	2.24	1.04841
Healthy	TGL49_0301_Cf_R_PE_382_WG	168.06	8	51.4734
Healthy	TGL49_0301_Cf_R_PE_382_WG	178.03	6.48	24.8993
Healthy	TGL49_0301_Cf_R_PE_382_WG	188.53	6.48	12.0123
Healthy	TGL49_0301_Cf_R_PE_382_WG	199.1	6.48	4.41231
Healthy	TGL49_0301_Cf_R_PE_382_WG	208.78	6.48	1.60423
Healthy	TGL49_0301_Cf_R_PE_382_WG	217	6.48	0.150423
Healthy	TGL49_0302_Cf_R_PE_367_WG	61.63	6.4	8.08304e-08
Healthy	TGL49_0302_Cf_R_PE_367_WG	70.77	6.4	3.18545e-12
Healthy	TGL49_0302_Cf_R_PE_367_WG	81.24	2	0.256592
Healthy	TGL49_0302_Cf_R_PE_367_WG	92.12	2	0.409329
Healthy	TGL49_0302_Cf_R_PE_367_WG	102.2	3.02	0.61002
Healthy	TGL49_0302_Cf_R_PE_367_WG	112	3.02	0.745936
Healthy	TGL49_0302_Cf_R_PE_367_WG	122.67	2	0.900594
Healthy	TGL49_0302_Cf_R_PE_367_WG	134.09	2	1.18337
Healthy	TGL49_0302_Cf_R_PE_367_WG	143.64	5.04	8.26906
Healthy	TGL49_0302_Cf_R_PE_367_WG	152.87	5.04	8.44859
Healthy	TGL49_0302_Cf_R_PE_367_WG	159.74	2	1.53246
Healthy	TGL49_0302_Cf_R_PE_367_WG	167.4	7.09	50.4725
Healthy	TGL49_0302_Cf_R_PE_367_WG	177.19	6.77	22.1955
Healthy	TGL49_0302_Cf_R_PE_367_WG	188.05	6.77	7.28632
Healthy	TGL49_0302_Cf_R_PE_367_WG	198.86	6.77	2.29131
Healthy	TGL49_0302_Cf_R_PE_367_WG	207	6.77	0.490253
Healthy	TGL49_0302_Cf_R_PE_367_WG	217.69	6.77	3.58336e-12
Healthy	TGL49_0303_Cf_R_PE_369_WG	60.99	2	1.43552e-12
Healthy	TGL49_0303_Cf_R_PE_369_WG	70.77	2	0.0286638
Healthy	TGL49_0303_Cf_R_PE_369_WG	81.14	2	0.140197
Healthy	TGL49_0303_Cf_R_PE_369_WG	92.09	2	0.262012
Healthy	TGL49_0303_Cf_R_PE_369_WG	102.14	2.94	0.354068
Healthy	TGL49_0303_Cf_R_PE_369_WG	111.71	2.94	0.434419
Healthy	TGL49_0303_Cf_R_PE_369_WG	122.53	2	0.491647
Healthy	TGL49_0303_Cf_R_PE_369_WG	134.1	2	0.554152
Healthy	TGL49_0303_Cf_R_PE_369_WG	143.64	4.7	4.25067
Healthy	TGL49_0303_Cf_R_PE_369_WG	152.32	4.7	5.82714
Healthy	TGL49_0303_Cf_R_PE_369_WG	159.62	2.77	2.22585
Healthy	TGL49_0303_Cf_R_PE_369_WG	167.75	6.62	42.7973
Healthy	TGL49_0303_Cf_R_PE_369_WG	177.32	6.27	30.6151
Healthy	TGL49_0303_Cf_R_PE_369_WG	187.94	6.27	12.2409
Healthy	TGL49_0303_Cf_R_PE_369_WG	198.67	6.27	3.53072
Healthy	TGL49_0303_Cf_R_PE_369_WG	207.83	6.27	1.04472
Healthy	TGL49_0303_Cf_R_PE_369_WG	217.08	6.27	5.10791e-12
Healthy	TGL49_0304_Cf_R_PE_449_WG	61.97	2	2.03548e-12
Healthy	TGL49_0304_Cf_R_PE_449_WG	70.61	2	0.0422661
Healthy	TGL49_0304_Cf_R_PE_449_WG	81.19	2.37	0.369001
Healthy	TGL49_0304_Cf_R_PE_449_WG	92.01	2.37	0.504433
Healthy	TGL49_0304_Cf_R_PE_449_WG	102.24	3.68	0.771276
Healthy	TGL49_0304_Cf_R_PE_449_WG	112.19	3.68	1.06264
Healthy	TGL49_0304_Cf_R_PE_449_WG	122.68	2.23	1.12421
Healthy	TGL49_0304_Cf_R_PE_449_WG	133.96	2.23	1.31083
Healthy	TGL49_0304_Cf_R_PE_449_WG	143.71	5.37	7.8943
Healthy	TGL49_0304_Cf_R_PE_449_WG	152.56	5.37	8.3923
Healthy	TGL49_0304_Cf_R_PE_449_WG	159.9	2.92	2.34686
Healthy	TGL49_0304_Cf_R_PE_449_WG	167.55	6.62	43.2486
Healthy	TGL49_0304_Cf_R_PE_449_WG	176.79	6.91	28.2898
Healthy	TGL49_0304_Cf_R_PE_449_WG	187.88	6.91	7.00556
Healthy	TGL49_0304_Cf_R_PE_449_WG	199.69	6.91	1.91014
Healthy	TGL49_0304_Cf_R_PE_449_WG	208.55	6.91	0.471468
Healthy	TGL49_0304_Cf_R_PE_449_WG	217.04	6.91	2.01311e-08
Healthy	TGL49_0305_Cf_R_PE_388_WG	61.55	2	2.74114e-12
Healthy	TGL49_0305_Cf_R_PE_388_WG	71.88	2	0.00540456
Healthy	TGL49_0305_Cf_R_PE_388_WG	81.25	2.09	0.183929
Healthy	TGL49_0305_Cf_R_PE_388_WG	92.18	2.09	0.29494
Healthy	TGL49_0305_Cf_R_PE_388_WG	102.25	3.08	0.433617
Healthy	TGL49_0305_Cf_R_PE_388_WG	112.05	3.08	0.583128
Healthy	TGL49_0305_Cf_R_PE_388_WG	122.7	2	0.664459
Healthy	TGL49_0305_Cf_R_PE_388_WG	134.12	2	0.827716
Healthy	TGL49_0305_Cf_R_PE_388_WG	143.77	4.91	5.14727
Healthy	TGL49_0305_Cf_R_PE_388_WG	152.6	4.91	5.9522
Healthy	TGL49_0305_Cf_R_PE_388_WG	160.22	3.42	2.58936
Healthy	TGL49_0305_Cf_R_PE_388_WG	167.93	6.95	39.9387
Healthy	TGL49_0305_Cf_R_PE_388_WG	177.46	7.08	28.8771
Healthy	TGL49_0305_Cf_R_PE_388_WG	188.37	7.08	12.1931
Healthy	TGL49_0305_Cf_R_PE_388_WG	198.9	7.08	4.88726
Healthy	TGL49_0305_Cf_R_PE_388_WG	208.92	7.08	1.92652
Healthy	TGL49_0305_Cf_R_PE_388_WG	218.31	7.08	0.476371
Healthy	TGL49_0306_Cf_R_PE_381_WG	61.39	2.21	2.6501e-12
Healthy	TGL49_0306_Cf_R_PE_381_WG	70.46	2.21	6.60516e-12
Healthy	TGL49_0306_Cf_R_PE_381_WG	81.3	2	0.078483
Healthy	TGL49_0306_Cf_R_PE_381_WG	92.26	2	0.214633
Healthy	TGL49_0306_Cf_R_PE_381_WG	102.32	2.54	0.312681
Healthy	TGL49_0306_Cf_R_PE_381_WG	111.62	2.54	0.346809
Healthy	TGL49_0306_Cf_R_PE_381_WG	122.67	2	0.535615
Healthy	TGL49_0306_Cf_R_PE_381_WG	134.22	2	0.966484
Healthy	TGL49_0306_Cf_R_PE_381_WG	143.66	4.66	6.90749
Healthy	TGL49_0306_Cf_R_PE_381_WG	152.78	4.66	7.6317
Healthy	TGL49_0306_Cf_R_PE_381_WG	159.88	2.8	2.54508
Healthy	TGL49_0306_Cf_R_PE_381_WG	167.46	6.85	50.9657
Healthy	TGL49_0306_Cf_R_PE_381_WG	177.1	6.74	23.7665
Healthy	TGL49_0306_Cf_R_PE_381_WG	187.98	6.74	7.59154
Healthy	TGL49_0306_Cf_R_PE_381_WG	199.39	6.74	2.46262
Healthy	TGL49_0306_Cf_R_PE_381_WG	208.72	6.74	0.707169
Healthy	TGL49_0306_Cf_R_PE_381_WG	217.7	6.74	2.01766e-10
Healthy	TGL61_0001_Cf_n_PE_366_WG	62	2.95	0.00274625
Healthy	TGL61_0001_Cf_n_PE_366_WG	70.98	2.95	0.0765243
Healthy	TGL61_0001_Cf_n_PE_366_WG	81.47	4.44	0.430055
Healthy	TGL61_0001_Cf_n_PE_366_WG	91.75	4.44	0.607188
Healthy	TGL61_0001_Cf_n_PE_366_WG	101.65	4.66	0.67764
Healthy	TGL61_0001_Cf_n_PE_366_WG	111.67	4.66	0.904306
Healthy	TGL61_0001_Cf_n_PE_366_WG	122.5	2	0.5581
Healthy	TGL61_0001_Cf_n_PE_366_WG	133.98	2	0.470766
Healthy	TGL61_0001_Cf_n_PE_366_WG	143.72	4.68	4.43471
Healthy	TGL61_0001_Cf_n_PE_366_WG	152.3	4.68	6.17156
Healthy	TGL61_0001_Cf_n_PE_366_WG	159.78	3.26	3.45149
Healthy	TGL61_0001_Cf_n_PE_366_WG	167.7	6.12	38.4996
Healthy	TGL61_0001_Cf_n_PE_366_WG	177.14	6.6	32.5901
Healthy	TGL61_0001_Cf_n_PE_366_WG	188.13	6.6	12.0441
Healthy	TGL61_0001_Cf_n_PE_366_WG	198.94	6.6	3.4007
Healthy	TGL61_0001_Cf_n_PE_366_WG	207	6.6	0.563337
Healthy	TGL61_0001_Cf_n_PE_366_WG	217	6.6	4.86278e-14
Healthy	TGL61_0002_Cf_n_PE_363_WG	61.22	2.35	0.0509454
Healthy	TGL61_0002_Cf_n_PE_363_WG	70.16	2.35	0.111361
Healthy	TGL61_0002_Cf_n_PE_363_WG	81.68	4.91	0.787714
Healthy	TGL61_0002_Cf_n_PE_363_WG	90.98	4.91	0.980207
Healthy	TGL61_0002_Cf_n_PE_363_WG	101.8	4.96	0.98865
Healthy	TGL61_0002_Cf_n_PE_363_WG	111.97	4.96	1.45998
Healthy	TGL61_0002_Cf_n_PE_363_WG	122.59	2.13	0.856015
Healthy	TGL61_0002_Cf_n_PE_363_WG	133.9	2.13	0.742724
Healthy	TGL61_0002_Cf_n_PE_363_WG	143.51	4.91	4.91231
Healthy	TGL61_0002_Cf_n_PE_363_WG	152.41	4.91	6.43853
Healthy	TGL61_0002_Cf_n_PE_363_WG	159.82	2.83	2.38315
Healthy	TGL61_0002_Cf_n_PE_363_WG	167.54	6.11	36.9686
Healthy	TGL61_0002_Cf_n_PE_363_WG	176.92	7.07	32.9991
Healthy	TGL61_0002_Cf_n_PE_363_WG	188.24	7.07	10.7657
Healthy	TGL61_0002_Cf_n_PE_363_WG	199.06	7.07	3.41056
Healthy	TGL61_0002_Cf_n_PE_363_WG	208.25	7.07	1.00098
Healthy	TGL61_0002_Cf_n_PE_363_WG	217.04	7.07	3.05422e-12
Healthy	TGL61_0003_Cf_n_PE_357_WG	61.57	2.1	3.77898e-12
Healthy	TGL61_0003_Cf_n_PE_357_WG	71.31	2.1	0.0638657
Healthy	TGL61_0003_Cf_n_PE_357_WG	83	5.47	0.9893
Healthy	TGL61_0003_Cf_n_PE_357_WG	92.04	5.47	1.03738
Healthy	TGL61_0003_Cf_n_PE_357_WG	101.47	5.62	1.15461
Healthy	TGL61_0003_Cf_n_PE_357_WG	111.97	5.62	1.7323
Healthy	TGL61_0003_Cf_n_PE_357_WG	122.63	2.47	1.00086
Healthy	TGL61_0003_Cf_n_PE_357_WG	133.82	2.47	0.871769
Healthy	TGL61_0003_Cf_n_PE_357_WG	143.48	5.16	5.043
Healthy	TGL61_0003_Cf_n_PE_357_WG	152.27	5.16	7.15303
Healthy	TGL61_0003_Cf_n_PE_357_WG	159.74	3.2	3.28994
Healthy	TGL61_0003_Cf_n_PE_357_WG	167.59	6	36.2452
Healthy	TGL61_0003_Cf_n_PE_357_WG	177.02	6.53	31.1915
Healthy	TGL61_0003_Cf_n_PE_357_WG	187.86	6.53	11.3456
Healthy	TGL61_0003_Cf_n_PE_357_WG	198.57	6.53	3.19589
Healthy	TGL61_0003_Cf_n_PE_357_WG	207	6.53	0.550273
Healthy	TGL61_0003_Cf_n_PE_357_WG	217	6.53	1.08031e-07
Healthy	TGL61_0004_Cf_n_PE_358_WG	61.39	2	1.98441e-12
Healthy	TGL61_0004_Cf_n_PE_358_WG	71.12	2	0.0630889
Healthy	TGL61_0004_Cf_n_PE_358_WG	81.63	4.24	0.639348
Healthy	TGL61_0004_Cf_n_PE_358_WG	91.96	4.24	0.931504
Healthy	TGL61_0004_Cf_n_PE_358_WG	101.8	4.43	0.92878
Healthy	TGL61_0004_Cf_n_PE_358_WG	112.01	4.43	1.31773
Healthy	TGL61_0004_Cf_n_PE_358_WG	122.72	2.17	0.926386
Healthy	TGL61_0004_Cf_n_PE_358_WG	133.93	2.17	0.789696
Healthy	TGL61_0004_Cf_n_PE_358_WG	143.42	4.94	5.13217
Healthy	TGL61_0004_Cf_n_PE_358_WG	152.36	4.94	6.85639
Healthy	TGL61_0004_Cf_n_PE_358_WG	159.56	2.95	2.77228
Healthy	TGL61_0004_Cf_n_PE_358_WG	167.45	5.83	38.2624
Healthy	TGL61_0004_Cf_n_PE_358_WG	176.76	6.64	32.8437
Healthy	TGL61_0004_Cf_n_PE_358_WG	187.84	6.64	10.1186
Healthy	TGL61_0004_Cf_n_PE_358_WG	199.07	6.64	2.76102
Healthy	TGL61_0004_Cf_n_PE_358_WG	207	6.64	0.406716
Healthy	TGL61_0004_Cf_n_PE_358_WG	217.27	6.64	1.85629e-13
Healthy	TGL61_0005_Cf_n_PE_358_WG	61.11	2.84	1.56519e-12
Healthy	TGL61_0005_Cf_n_PE_358_WG	68.06	2.84	2.05125e-12
Healthy	TGL61_0005_Cf_n_PE_358_WG	83	4.97	0.333294
Healthy	TGL61_0005_Cf_n_PE_358_WG	90.84	4.97	0.214607
Healthy	TGL61_0005_Cf_n_PE_358_WG	100	5.19	0.578352
Healthy	TGL61_0005_Cf_n_PE_358_WG	110.87	5.19	0.790275
Healthy	TGL61_0005_Cf_n_PE_358_WG	122.33	2	0.377148
Healthy	TGL61_0005_Cf_n_PE_358_WG	133.83	2	0.26563
Healthy	TGL61_0005_Cf_n_PE_358_WG	142.99	4.62	3.09458
Healthy	TGL61_0005_Cf_n_PE_358_WG	151.84	4.62	5.37476
Healthy	TGL61_0005_Cf_n_PE_358_WG	159.64	3.09	3.4573
Healthy	TGL61_0005_Cf_n_PE_358_WG	167.63	5.48	35.4188
Healthy	TGL61_0005_Cf_n_PE_358_WG	177.24	6.29	36.4428
Healthy	TGL61_0005_Cf_n_PE_358_WG	188.2	6.29	13.5711
Healthy	TGL61_0005_Cf_n_PE_358_WG	198.59	6.29	3.80416
Healthy	TGL61_0005_Cf_n_PE_358_WG	207.03	6.29	0.90242
Healthy	TGL61_0005_Cf_n_PE_358_WG	217	6.29	3.9142e-12
LFS_cancer_negative	TGL49_0003_Cf_U_PE_318_WG	61.76	2	8.64731e-12
LFS_cancer_negative	TGL49_0003_Cf_U_PE_318_WG	71.2	2	0.0745873
LFS_cancer_negative	TGL49_0003_Cf_U_PE_318_WG	82.14	2	0.217535
LFS_cancer_negative	TGL49_0003_Cf_U_PE_318_WG	91.76	2	0.240368
LFS_cancer_negative	TGL49_0003_Cf_U_PE_318_WG	102.23	3.19	0.418821
LFS_cancer_negative	TGL49_0003_Cf_U_PE_318_WG	112.12	3.19	0.478868
LFS_cancer_negative	TGL49_0003_Cf_U_PE_318_WG	122.41	2	0.565597
LFS_cancer_negative	TGL49_0003_Cf_U_PE_318_WG	134.11	2	0.772583
LFS_cancer_negative	TGL49_0003_Cf_U_PE_318_WG	143.83	4.76	5.35698
LFS_cancer_negative	TGL49_0003_Cf_U_PE_318_WG	152.63	4.76	6.36385
LFS_cancer_negative	TGL49_0003_Cf_U_PE_318_WG	160.28	3.57	3.46858
LFS_cancer_negative	TGL49_0003_Cf_U_PE_318_WG	167.67	6.3	35.2902
LFS_cancer_negative	TGL49_0003_Cf_U_PE_318_WG	177.05	7.56	35.0818
LFS_cancer_negative	TGL49_0003_Cf_U_PE_318_WG	188.7	7.56	11.3761
LFS_cancer_negative	TGL49_0003_Cf_U_PE_318_WG	200.26	7.56	3.84735
LFS_cancer_negative	TGL49_0003_Cf_U_PE_318_WG	211	7.56	1.30142
LFS_cancer_negative	TGL49_0003_Cf_U_PE_318_WG	219.33	7.56	0.13672
LFS_cancer_negative	TGL49_0004_Cf_U_PE_319_WG	61.9	6.91	7.99805e-13
LFS_cancer_negative	TGL49_0004_Cf_U_PE_319_WG	69.59	6.91	5.23359e-13
LFS_cancer_negative	TGL49_0004_Cf_U_PE_319_WG	82.25	2.02	0.18451
LFS_cancer_negative	TGL49_0004_Cf_U_PE_319_WG	91.95	2.02	0.286074
LFS_cancer_negative	TGL49_0004_Cf_U_PE_319_WG	102.18	3.71	0.574353
LFS_cancer_negative	TGL49_0004_Cf_U_PE_319_WG	112.14	3.71	0.705502
LFS_cancer_negative	TGL49_0004_Cf_U_PE_319_WG	122.65	2	0.70386
LFS_cancer_negative	TGL49_0004_Cf_U_PE_319_WG	134.04	2	0.798591
LFS_cancer_negative	TGL49_0004_Cf_U_PE_319_WG	143.55	5.06	6.25795
LFS_cancer_negative	TGL49_0004_Cf_U_PE_319_WG	152.45	5.06	7.43079
LFS_cancer_negative	TGL49_0004_Cf_U_PE_319_WG	159.67	3.1	3.09232
LFS_cancer_negative	TGL49_0004_Cf_U_PE_319_WG	167.52	6.44	43.0276
LFS_cancer_negative	TGL49_0004_Cf_U_PE_319_WG	177.05	6.98	29.6623
LFS_cancer_negative	TGL49_0004_Cf_U_PE_319_WG	188.26	6.98	9.15869
LFS_cancer_negative	TGL49_0004_Cf_U_PE_319_WG	199.62	6.98	2.41079
LFS_cancer_negative	TGL49_0004_Cf_U_PE_319_WG	208.33	6.98	0.585932
LFS_cancer_negative	TGL49_0004_Cf_U_PE_319_WG	219.13	6.98	2.85705e-12
LFS_cancer_negative	TGL49_0007_Cf_U_PE_314_WG	58.67	5.6	0.400463
LFS_cancer_negative	TGL49_0007_Cf_U_PE_314_WG	70.91	5.6	0.545764
LFS_cancer_negative	TGL49_0007_Cf_U_PE_314_WG	81.91	2.63	0.744612
LFS_cancer_negative	TGL49_0007_Cf_U_PE_314_WG	91.85	2.63	0.922696
LFS_cancer_negative	TGL49_0007_Cf_U_PE_314_WG	102.19	3.8	1.26854
LFS_cancer_negative	TGL49_0007_Cf_U_PE_314_WG	112.46	3.8	1.59635
LFS_cancer_negative	TGL49_0007_Cf_U_PE_314_WG	122.62	2.57	1.81076
LFS_cancer_negative	TGL49_0007_Cf_U_PE_314_WG	134.02	2.57	1.93848
LFS_cancer_negative	TGL49_0007_Cf_U_PE_314_WG	143.73	5.14	8.31466
LFS_cancer_negative	TGL49_0007_Cf_U_PE_314_WG	152.97	5.14	7.05438
LFS_cancer_negative	TGL49_0007_Cf_U_PE_314_WG	160.17	2.89	2.12643
LFS_cancer_negative	TGL49_0007_Cf_U_PE_314_WG	167.6	6.98	35.3903
LFS_cancer_negative	TGL49_0007_Cf_U_PE_314_WG	177.29	7.52	27.4402
LFS_cancer_negative	TGL49_0007_Cf_U_PE_314_WG	188.71	7.52	10.1536
LFS_cancer_negative	TGL49_0007_Cf_U_PE_314_WG	199.9	7.52	3.54763
LFS_cancer_negative	TGL49_0007_Cf_U_PE_314_WG	210.2	7.52	1.2368
LFS_cancer_negative	TGL49_0007_Cf_U_PE_314_WG	219.39	7.52	0.340605
LFS_cancer_negative	TGL49_0007_Pb_n_PE_301_WG	62	3.44	0.0475565
LFS_cancer_negative	TGL49_0007_Pb_n_PE_301_WG	70.68	3.44	0.23195
LFS_cancer_negative	TGL49_0007_Pb_n_PE_301_WG	80.92	2.42	0.440491
LFS_cancer_negative	TGL49_0007_Pb_n_PE_301_WG	91.76	2.42	0.616843
LFS_cancer_negative	TGL49_0007_Pb_n_PE_301_WG	101.87	3.34	0.809176
LFS_cancer_negative	TGL49_0007_Pb_n_PE_301_WG	111.91	3.34	1.08604
LFS_cancer_negative	TGL49_0007_Pb_n_PE_301_WG	122.52	2.1	1.22843
LFS_cancer_negative	TGL49_0007_Pb_n_PE_301_WG	133.77	2.1	1.49701
LFS_cancer_negative	TGL49_0007_Pb_n_PE_301_WG	143.34	4.56	6.43763
LFS_cancer_negative	TGL49_0007_Pb_n_PE_301_WG	152.5	4.56	6.46036
LFS_cancer_negative	TGL49_0007_Pb_n_PE_301_WG	160.02	2.79	2.35905
LFS_cancer_negative	TGL49_0007_Pb_n_PE_301_WG	167.42	6.86	36.4229
LFS_cancer_negative	TGL49_0007_Pb_n_PE_301_WG	177.32	7.33	28.1535
LFS_cancer_negative	TGL49_0007_Pb_n_PE_301_WG	188.62	7.33	12.2114
LFS_cancer_negative	TGL49_0007_Pb_n_PE_301_WG	199.62	7.33	4.82171
LFS_cancer_negative	TGL49_0007_Pb_n_PE_301_WG	210.38	7.33	1.80406
LFS_cancer_negative	TGL49_0007_Pb_n_PE_301_WG	218.69	7.33	0.20869
LFS_cancer_negative	TGL49_0007_Pb_n_PE_302_WG	61.27	4.11	0.112574
LFS_cancer_negative	TGL49_0007_Pb_n_PE_302_WG	70.77	4.11	0.506034
LFS_cancer_negative	TGL49_0007_Pb_n_PE_302_WG	80.97	2.55	0.733707
LFS_cancer_negative	TGL49_0007_Pb_n_PE_302_WG	91.79	2.55	0.957139
LFS_cancer_negative	TGL49_0007_Pb_n_PE_302_WG	101.84	3.46	1.17144
LFS_cancer_negative	TGL49_0007_Pb_n_PE_302_WG	111.93	3.46	1.44565
LFS_cancer_negative	TGL49_0007_Pb_n_PE_302_WG	122.52	2.13	1.50458
LFS_cancer_negative	TGL49_0007_Pb_n_PE_302_WG	133.77	2.13	1.68405
LFS_cancer_negative	TGL49_0007_Pb_n_PE_302_WG	143.28	4.69	7.5616
LFS_cancer_negative	TGL49_0007_Pb_n_PE_302_WG	152.43	4.69	7.4256
LFS_cancer_negative	TGL49_0007_Pb_n_PE_302_WG	159.77	2.72	2.50416
LFS_cancer_negative	TGL49_0007_Pb_n_PE_302_WG	167.24	6.61	38.3403
LFS_cancer_negative	TGL49_0007_Pb_n_PE_302_WG	177.01	7.23	26.5823
LFS_cancer_negative	TGL49_0007_Pb_n_PE_302_WG	188.49	7.23	9.62304
LFS_cancer_negative	TGL49_0007_Pb_n_PE_302_WG	199.87	7.23	3.37958
LFS_cancer_negative	TGL49_0007_Pb_n_PE_302_WG	210.15	7.23	1.16579
LFS_cancer_negative	TGL49_0007_Pb_n_PE_302_WG	217	7.23	2.01313e-07
LFS_cancer_negative	TGL49_0007_Pb_n_PE_453_WG	62	6.21	8.86802e-12
LFS_cancer_negative	TGL49_0007_Pb_n_PE_453_WG	69.71	6.21	3.40417e-12
LFS_cancer_negative	TGL49_0007_Pb_n_PE_453_WG	80.52	3.47	2.22138e-08
LFS_cancer_negative	TGL49_0007_Pb_n_PE_453_WG	91.92	3.47	5.81246e-12
LFS_cancer_negative	TGL49_0007_Pb_n_PE_453_WG	103.99	6.45	6.08069e-12
LFS_cancer_negative	TGL49_0007_Pb_n_PE_453_WG	112.95	6.45	5.10481e-13
LFS_cancer_negative	TGL49_0007_Pb_n_PE_453_WG	122.74	2.02	0.228998
LFS_cancer_negative	TGL49_0007_Pb_n_PE_453_WG	134.34	2.02	0.534325
LFS_cancer_negative	TGL49_0007_Pb_n_PE_453_WG	143.61	4.24	4.26111
LFS_cancer_negative	TGL49_0007_Pb_n_PE_453_WG	152.41	4.24	5.52194
LFS_cancer_negative	TGL49_0007_Pb_n_PE_453_WG	160.13	3.35	3.76805
LFS_cancer_negative	TGL49_0007_Pb_n_PE_453_WG	167.76	6.17	37.7215
LFS_cancer_negative	TGL49_0007_Pb_n_PE_453_WG	177.42	7.17	33.5386
LFS_cancer_negative	TGL49_0007_Pb_n_PE_453_WG	188.68	7.17	13.3269
LFS_cancer_negative	TGL49_0007_Pb_n_PE_453_WG	199.79	7.17	4.93544
LFS_cancer_negative	TGL49_0007_Pb_n_PE_453_WG	210.64	7.17	1.74663
LFS_cancer_negative	TGL49_0007_Pb_n_PE_453_WG	217.44	7.17	7.79243e-12
LFS_cancer_negative	TGL49_0018_Cf_U_PE_308_WG	61.82	5.63	8.61089e-13
LFS_cancer_negative	TGL49_0018_Cf_U_PE_308_WG	71.73	5.63	1.51723e-12
LFS_cancer_negative	TGL49_0018_Cf_U_PE_308_WG	81.27	2	0.157863
LFS_cancer_negative	TGL49_0018_Cf_U_PE_308_WG	92.12	2	0.275533
LFS_cancer_negative	TGL49_0018_Cf_U_PE_308_WG	102.28	3.07	0.477582
LFS_cancer_negative	TGL49_0018_Cf_U_PE_308_WG	111.95	3.07	0.614189
LFS_cancer_negative	TGL49_0018_Cf_U_PE_308_WG	122.66	2	0.756647
LFS_cancer_negative	TGL49_0018_Cf_U_PE_308_WG	134.07	2	1.06323
LFS_cancer_negative	TGL49_0018_Cf_U_PE_308_WG	143.64	5.19	7.67419
LFS_cancer_negative	TGL49_0018_Cf_U_PE_308_WG	152.52	5.19	8.37727
LFS_cancer_negative	TGL49_0018_Cf_U_PE_308_WG	159.73	2.84	2.41004
LFS_cancer_negative	TGL49_0018_Cf_U_PE_308_WG	167.42	6.62	45.3338
LFS_cancer_negative	TGL49_0018_Cf_U_PE_308_WG	176.95	7.06	27.1856
LFS_cancer_negative	TGL49_0018_Cf_U_PE_308_WG	188.49	7.06	7.65782
LFS_cancer_negative	TGL49_0018_Cf_U_PE_308_WG	199.96	7.06	2.28256
LFS_cancer_negative	TGL49_0018_Cf_U_PE_308_WG	209.08	7.06	0.645109
LFS_cancer_negative	TGL49_0018_Cf_U_PE_308_WG	220.61	7.06	4.86172e-08
LFS_cancer_negative	TGL49_0018_Cf_U_PE_320_WG	58	6.86	0.684496
LFS_cancer_negative	TGL49_0018_Cf_U_PE_320_WG	71.38	6.86	0.842294
LFS_cancer_negative	TGL49_0018_Cf_U_PE_320_WG	82.32	3.61	0.852734
LFS_cancer_negative	TGL49_0018_Cf_U_PE_320_WG	91.43	3.61	0.920494
LFS_cancer_negative	TGL49_0018_Cf_U_PE_320_WG	102.2	4.82	1.30681
LFS_cancer_negative	TGL49_0018_Cf_U_PE_320_WG	112.88	4.82	1.4759
LFS_cancer_negative	TGL49_0018_Cf_U_PE_320_WG	122.74	2.59	1.3633
LFS_cancer_negative	TGL49_0018_Cf_U_PE_320_WG	134.03	2.59	1.69285
LFS_cancer_negative	TGL49_0018_Cf_U_PE_320_WG	143.46	5.18	7.5919
LFS_cancer_negative	TGL49_0018_Cf_U_PE_320_WG	152.81	5.18	7.71655
LFS_cancer_negative	TGL49_0018_Cf_U_PE_320_WG	160.03	2.75	2.20482
LFS_cancer_negative	TGL49_0018_Cf_U_PE_320_WG	167.25	6.58	33.9988
LFS_cancer_negative	TGL49_0018_Cf_U_PE_320_WG	176.97	8	28.3702
LFS_cancer_negative	TGL49_0018_Cf_U_PE_320_WG	189.09	8	9.41011
LFS_cancer_negative	TGL49_0018_Cf_U_PE_320_WG	200.6	8	3.87475
LFS_cancer_negative	TGL49_0018_Cf_U_PE_320_WG	210.27	8	1.34067
LFS_cancer_negative	TGL49_0018_Cf_U_PE_320_WG	221	8	1.13827
LFS_cancer_negative	TGL49_0018_Cf_U_PE_321_WG	60.64	2.09	5.70655e-13
LFS_cancer_negative	TGL49_0018_Cf_U_PE_321_WG	70.43	2.09	0.0167216
LFS_cancer_negative	TGL49_0018_Cf_U_PE_321_WG	81.18	2	0.17599
LFS_cancer_negative	TGL49_0018_Cf_U_PE_321_WG	92.25	2	0.242628
LFS_cancer_negative	TGL49_0018_Cf_U_PE_321_WG	102.28	2.69	0.325401
LFS_cancer_negative	TGL49_0018_Cf_U_PE_321_WG	111.63	2.69	0.35984
LFS_cancer_negative	TGL49_0018_Cf_U_PE_321_WG	122.64	2	0.47797
LFS_cancer_negative	TGL49_0018_Cf_U_PE_321_WG	134.28	2	0.969738
LFS_cancer_negative	TGL49_0018_Cf_U_PE_321_WG	143.54	4.49	6.19086
LFS_cancer_negative	TGL49_0018_Cf_U_PE_321_WG	151.73	4.49	5.48058
LFS_cancer_negative	TGL49_0018_Cf_U_PE_321_WG	161	7.55	17.534
LFS_cancer_negative	TGL49_0018_Cf_U_PE_321_WG	167.77	5.38	33.1632
LFS_cancer_negative	TGL49_0018_Cf_U_PE_321_WG	176.23	7.07	30.3803
LFS_cancer_negative	TGL49_0018_Cf_U_PE_321_WG	187.96	7.07	6.61068
LFS_cancer_negative	TGL49_0018_Cf_U_PE_321_WG	200.03	7.07	2.12041
LFS_cancer_negative	TGL49_0018_Cf_U_PE_321_WG	209.8	7.07	0.679609
LFS_cancer_negative	TGL49_0018_Cf_U_PE_321_WG	219.72	7.07	1.63978e-07
LFS_cancer_negative	TGL49_0018_Cf_U_PE_323_WG	60.83	5.22	5.88107e-12
LFS_cancer_negative	TGL49_0018_Cf_U_PE_323_WG	72	5.22	0.798961
LFS_cancer_negative	TGL49_0018_Cf_U_PE_323_WG	83	7.7	4.66276
LFS_cancer_negative	TGL49_0018_Cf_U_PE_323_WG	93.86	7.7	4.25732
LFS_cancer_negative	TGL49_0018_Cf_U_PE_323_WG	103.4	8	3.55738
LFS_cancer_negative	TGL49_0018_Cf_U_PE_323_WG	113	8	5.03084
LFS_cancer_negative	TGL49_0018_Cf_U_PE_323_WG	123.32	4.78	3.28947
LFS_cancer_negative	TGL49_0018_Cf_U_PE_323_WG	133.58	4.78	3.46406
LFS_cancer_negative	TGL49_0018_Cf_U_PE_323_WG	143.43	7.44	9.38348
LFS_cancer_negative	TGL49_0018_Cf_U_PE_323_WG	153.13	7.44	8.9965
LFS_cancer_negative	TGL49_0018_Cf_U_PE_323_WG	160.06	2	0.493208
LFS_cancer_negative	TGL49_0018_Cf_U_PE_323_WG	167.3	7.96	27.629
LFS_cancer_negative	TGL49_0018_Cf_U_PE_323_WG	177.33	8	16.7763
LFS_cancer_negative	TGL49_0018_Cf_U_PE_323_WG	189.06	8	6.78585
LFS_cancer_negative	TGL49_0018_Cf_U_PE_323_WG	199.79	8	2.9311
LFS_cancer_negative	TGL49_0018_Cf_U_PE_323_WG	207	8	1.93396
LFS_cancer_negative	TGL49_0018_Cf_U_PE_323_WG	221	8	4.40354
LFS_cancer_negative	TGL49_0019_Cf_U_PE_315_WG	58.94	2	5.68456e-12
LFS_cancer_negative	TGL49_0019_Cf_U_PE_315_WG	70.72	2	8.35554e-13
LFS_cancer_negative	TGL49_0019_Cf_U_PE_315_WG	82.24	2	0.147639
LFS_cancer_negative	TGL49_0019_Cf_U_PE_315_WG	92	2	0.267584
LFS_cancer_negative	TGL49_0019_Cf_U_PE_315_WG	102.31	3	0.492511
LFS_cancer_negative	TGL49_0019_Cf_U_PE_315_WG	112.01	3	0.567109
LFS_cancer_negative	TGL49_0019_Cf_U_PE_315_WG	122.57	2	0.663171
LFS_cancer_negative	TGL49_0019_Cf_U_PE_315_WG	134.11	2	0.927675
LFS_cancer_negative	TGL49_0019_Cf_U_PE_315_WG	143.56	4.79	7.07476
LFS_cancer_negative	TGL49_0019_Cf_U_PE_315_WG	152.09	4.79	5.82788
LFS_cancer_negative	TGL49_0019_Cf_U_PE_315_WG	160.84	8	15.6655
LFS_cancer_negative	TGL49_0019_Cf_U_PE_315_WG	167.58	5.73	35.8288
LFS_cancer_negative	TGL49_0019_Cf_U_PE_315_WG	176.38	7.47	29.9504
LFS_cancer_negative	TGL49_0019_Cf_U_PE_315_WG	188.48	7.47	6.08682
LFS_cancer_negative	TGL49_0019_Cf_U_PE_315_WG	200.93	7.47	1.62831
LFS_cancer_negative	TGL49_0019_Cf_U_PE_315_WG	207.2	7.47	0.101695
LFS_cancer_negative	TGL49_0019_Cf_U_PE_315_WG	220.87	7.47	9.90319e-14
LFS_cancer_negative	TGL49_0019_Cf_U_PE_324_WG	60.32	3.23	0.193848
LFS_cancer_negative	TGL49_0019_Cf_U_PE_324_WG	68	3.23	0.328313
LFS_cancer_negative	TGL49_0019_Cf_U_PE_324_WG	83	3.35	0.613975
LFS_cancer_negative	TGL49_0019_Cf_U_PE_324_WG	91.72	3.35	0.537874
LFS_cancer_negative	TGL49_0019_Cf_U_PE_324_WG	102.6	4.81	0.945048
LFS_cancer_negative	TGL49_0019_Cf_U_PE_324_WG	113	4.81	0.845211
LFS_cancer_negative	TGL49_0019_Cf_U_PE_324_WG	122.11	2.37	0.747108
LFS_cancer_negative	TGL49_0019_Cf_U_PE_324_WG	134.23	2.37	1.08025
LFS_cancer_negative	TGL49_0019_Cf_U_PE_324_WG	143.96	4.6	5.72889
LFS_cancer_negative	TGL49_0019_Cf_U_PE_324_WG	152.92	4.6	6.38748
LFS_cancer_negative	TGL49_0019_Cf_U_PE_324_WG	160.19	2.89	2.94326
LFS_cancer_negative	TGL49_0019_Cf_U_PE_324_WG	167.65	6.55	36.6551
LFS_cancer_negative	TGL49_0019_Cf_U_PE_324_WG	177.52	7.23	28.7136
LFS_cancer_negative	TGL49_0019_Cf_U_PE_324_WG	188.92	7.23	11.866
LFS_cancer_negative	TGL49_0019_Cf_U_PE_324_WG	199.99	7.23	4.62226
LFS_cancer_negative	TGL49_0019_Cf_U_PE_324_WG	209.35	7.23	1.76042
LFS_cancer_negative	TGL49_0019_Cf_U_PE_324_WG	218.86	7.23	0.755799
LFS_cancer_negative	TGL49_0022_Cf_U_PE_310_WG	61.79	2	9.38706e-08
LFS_cancer_negative	TGL49_0022_Cf_U_PE_310_WG	71.83	2	0.0538484
LFS_cancer_negative	TGL49_0022_Cf_U_PE_310_WG	81.55	2.08	0.285347
LFS_cancer_negative	TGL49_0022_Cf_U_PE_310_WG	91.97	2.08	0.398311
LFS_cancer_negative	TGL49_0022_Cf_U_PE_310_WG	102.3	3.93	0.80816
LFS_cancer_negative	TGL49_0022_Cf_U_PE_310_WG	112.35	3.93	1.06764
LFS_cancer_negative	TGL49_0022_Cf_U_PE_310_WG	122.67	2.17	1.01401
LFS_cancer_negative	TGL49_0022_Cf_U_PE_310_WG	133.99	2.17	1.21623
LFS_cancer_negative	TGL49_0022_Cf_U_PE_310_WG	143.73	5.18	8.03183
LFS_cancer_negative	TGL49_0022_Cf_U_PE_310_WG	152.83	5.18	8.05538
LFS_cancer_negative	TGL49_0022_Cf_U_PE_310_WG	160	2.67	2.07922
LFS_cancer_negative	TGL49_0022_Cf_U_PE_310_WG	167.46	6.84	43.4383
LFS_cancer_negative	TGL49_0022_Cf_U_PE_310_WG	176.97	7.23	26.9095
LFS_cancer_negative	TGL49_0022_Cf_U_PE_310_WG	188.43	7.23	7.97864
LFS_cancer_negative	TGL49_0022_Cf_U_PE_310_WG	199.85	7.23	2.64143
LFS_cancer_negative	TGL49_0022_Cf_U_PE_310_WG	209.84	7.23	0.900144
LFS_cancer_negative	TGL49_0022_Cf_U_PE_310_WG	217.04	7.23	1.53144e-12
LFS_cancer_negative	TGL49_0022_Cf_U_PE_315_WG	61.94	2	7.93587e-13
LFS_cancer_negative	TGL49_0022_Cf_U_PE_315_WG	71.29	2	0.0128669
LFS_cancer_negative	TGL49_0022_Cf_U_PE_315_WG	81.3	2	0.160188
LFS_cancer_negative	TGL49_0022_Cf_U_PE_315_WG	92.12	2	0.261224
LFS_cancer_negative	TGL49_0022_Cf_U_PE_315_WG	102.34	3.74	0.530032
LFS_cancer_negative	TGL49_0022_Cf_U_PE_315_WG	112.17	3.74	0.71142
LFS_cancer_negative	TGL49_0022_Cf_U_PE_315_WG	122.64	2	0.633043
LFS_cancer_negative	TGL49_0022_Cf_U_PE_315_WG	133.96	2	0.800247
LFS_cancer_negative	TGL49_0022_Cf_U_PE_315_WG	143.64	4.9	5.50504
LFS_cancer_negative	TGL49_0022_Cf_U_PE_315_WG	152.57	4.9	6.24581
LFS_cancer_negative	TGL49_0022_Cf_U_PE_315_WG	160.04	3.06	2.34944
LFS_cancer_negative	TGL49_0022_Cf_U_PE_315_WG	167.71	6.94	40.4101
LFS_cancer_negative	TGL49_0022_Cf_U_PE_315_WG	177.3	7.41	30.5903
LFS_cancer_negative	TGL49_0022_Cf_U_PE_315_WG	188.59	7.41	11.1365
LFS_cancer_negative	TGL49_0022_Cf_U_PE_315_WG	199.64	7.41	4.09796
LFS_cancer_negative	TGL49_0022_Cf_U_PE_315_WG	210.21	7.41	1.39692
LFS_cancer_negative	TGL49_0022_Cf_U_PE_315_WG	217.78	7.41	0.207899
LFS_cancer_negative	TGL49_0022_Cf_U_PE_316_WG	60.99	2.78	7.77156e-15
LFS_cancer_negative	TGL49_0022_Cf_U_PE_316_WG	69.69	2.78	6.15064e-14
LFS_cancer_negative	TGL49_0022_Cf_U_PE_316_WG	82.6	2.41	0.480402
LFS_cancer_negative	TGL49_0022_Cf_U_PE_316_WG	90.54	2.41	0.3513
LFS_cancer_negative	TGL49_0022_Cf_U_PE_316_WG	102.25	4.66	0.784568
LFS_cancer_negative	TGL49_0022_Cf_U_PE_316_WG	113	4.66	0.964777
LFS_cancer_negative	TGL49_0022_Cf_U_PE_316_WG	122.06	2.31	0.700471
LFS_cancer_negative	TGL49_0022_Cf_U_PE_316_WG	133.77	2.31	0.782278
LFS_cancer_negative	TGL49_0022_Cf_U_PE_316_WG	143.49	5.35	6.26868
LFS_cancer_negative	TGL49_0022_Cf_U_PE_316_WG	152.48	5.35	6.69516
LFS_cancer_negative	TGL49_0022_Cf_U_PE_316_WG	159.29	2.89	2.38255
LFS_cancer_negative	TGL49_0022_Cf_U_PE_316_WG	167.18	6.62	41.6479
LFS_cancer_negative	TGL49_0022_Cf_U_PE_316_WG	176.77	6.97	30.201
LFS_cancer_negative	TGL49_0022_Cf_U_PE_316_WG	188.12	6.97	9.83428
LFS_cancer_negative	TGL49_0022_Cf_U_PE_316_WG	199.25	6.97	2.91395
LFS_cancer_negative	TGL49_0022_Cf_U_PE_316_WG	208.15	6.97	0.885465
LFS_cancer_negative	TGL49_0022_Cf_U_PE_316_WG	217	6.97	1.65201e-13
LFS_cancer_negative	TGL49_0022_Cf_U_PE_320_WG	58	4.53	0.0864005
LFS_cancer_negative	TGL49_0022_Cf_U_PE_320_WG	69.96	4.53	0.110561
LFS_cancer_negative	TGL49_0022_Cf_U_PE_320_WG	81.74	2.02	0.25105
LFS_cancer_negative	TGL49_0022_Cf_U_PE_320_WG	91.57	2.02	0.320774
LFS_cancer_negative	TGL49_0022_Cf_U_PE_320_WG	102.18	3.86	0.682791
LFS_cancer_negative	TGL49_0022_Cf_U_PE_320_WG	112.48	3.86	0.896895
LFS_cancer_negative	TGL49_0022_Cf_U_PE_320_WG	122.56	2.1	0.801571
LFS_cancer_negative	TGL49_0022_Cf_U_PE_320_WG	133.93	2.1	0.976396
LFS_cancer_negative	TGL49_0022_Cf_U_PE_320_WG	143.78	5.09	6.82637
LFS_cancer_negative	TGL49_0022_Cf_U_PE_320_WG	152.87	5.09	6.55721
LFS_cancer_negative	TGL49_0022_Cf_U_PE_320_WG	159.87	2.78	1.75505
LFS_cancer_negative	TGL49_0022_Cf_U_PE_320_WG	167.45	7.18	40.3907
LFS_cancer_negative	TGL49_0022_Cf_U_PE_320_WG	177.13	7.76	29.2859
LFS_cancer_negative	TGL49_0022_Cf_U_PE_320_WG	188.93	7.76	9.85368
LFS_cancer_negative	TGL49_0022_Cf_U_PE_320_WG	200.03	7.76	3.96759
LFS_cancer_negative	TGL49_0022_Cf_U_PE_320_WG	210.56	7.76	1.66012
LFS_cancer_negative	TGL49_0022_Cf_U_PE_320_WG	221	7.76	0.587471
LFS_cancer_negative	TGL49_0022_Pb_n_PE_305_WG	61.69	4.05	0.0838718
LFS_cancer_negative	TGL49_0022_Pb_n_PE_305_WG	70.76	4.05	0.197329
LFS_cancer_negative	TGL49_0022_Pb_n_PE_305_WG	80.94	2.48	0.431968
LFS_cancer_negative	TGL49_0022_Pb_n_PE_305_WG	91.8	2.48	0.57412
LFS_cancer_negative	TGL49_0022_Pb_n_PE_305_WG	101.87	3.86	0.936714
LFS_cancer_negative	TGL49_0022_Pb_n_PE_305_WG	111.89	3.86	1.22674
LFS_cancer_negative	TGL49_0022_Pb_n_PE_305_WG	122.48	2.05	1.0818
LFS_cancer_negative	TGL49_0022_Pb_n_PE_305_WG	133.76	2.05	1.32217
LFS_cancer_negative	TGL49_0022_Pb_n_PE_305_WG	143.34	4.75	7.29806
LFS_cancer_negative	TGL49_0022_Pb_n_PE_305_WG	152.48	4.75	7.90588
LFS_cancer_negative	TGL49_0022_Pb_n_PE_305_WG	160.02	2.74	2.49931
LFS_cancer_negative	TGL49_0022_Pb_n_PE_305_WG	167.37	6.81	42.4567
LFS_cancer_negative	TGL49_0022_Pb_n_PE_305_WG	177.07	6.94	25.7987
LFS_cancer_negative	TGL49_0022_Pb_n_PE_305_WG	188.35	6.94	8.98037
LFS_cancer_negative	TGL49_0022_Pb_n_PE_305_WG	199.7	6.94	3.064
LFS_cancer_negative	TGL49_0022_Pb_n_PE_305_WG	209.45	6.94	0.921961
LFS_cancer_negative	TGL49_0022_Pb_n_PE_305_WG	218.56	6.94	2.41294e-07
LFS_cancer_negative	TGL49_0022_Pb_n_PE_306_WG	60.91	2.83	3.17546e-12
LFS_cancer_negative	TGL49_0022_Pb_n_PE_306_WG	71.05	2.83	0.185112
LFS_cancer_negative	TGL49_0022_Pb_n_PE_306_WG	80.88	2.29	0.423286
LFS_cancer_negative	TGL49_0022_Pb_n_PE_306_WG	91.81	2.29	0.586435
LFS_cancer_negative	TGL49_0022_Pb_n_PE_306_WG	102.03	3.94	1.05237
LFS_cancer_negative	TGL49_0022_Pb_n_PE_306_WG	112.03	3.94	1.35991
LFS_cancer_negative	TGL49_0022_Pb_n_PE_306_WG	122.49	2.1	1.19477
LFS_cancer_negative	TGL49_0022_Pb_n_PE_306_WG	133.73	2.1	1.4742
LFS_cancer_negative	TGL49_0022_Pb_n_PE_306_WG	143.33	4.83	8.17452
LFS_cancer_negative	TGL49_0022_Pb_n_PE_306_WG	152.43	4.83	8.08736
LFS_cancer_negative	TGL49_0022_Pb_n_PE_306_WG	159.91	2.76	2.38357
LFS_cancer_negative	TGL49_0022_Pb_n_PE_306_WG	167.25	6.81	42.7176
LFS_cancer_negative	TGL49_0022_Pb_n_PE_306_WG	176.91	7.1	24.8815
LFS_cancer_negative	TGL49_0022_Pb_n_PE_306_WG	188.44	7.1	8.23692
LFS_cancer_negative	TGL49_0022_Pb_n_PE_306_WG	199.86	7.1	2.92382
LFS_cancer_negative	TGL49_0022_Pb_n_PE_306_WG	209.93	7.1	1.03435
LFS_cancer_negative	TGL49_0022_Pb_n_PE_306_WG	217	7.1	4.83639e-07
LFS_cancer_negative	TGL49_0022_Pb_n_PE_307_WG	60.98	2	2.33213e-12
LFS_cancer_negative	TGL49_0022_Pb_n_PE_307_WG	70.38	2	0.0275633
LFS_cancer_negative	TGL49_0022_Pb_n_PE_307_WG	81.17	2	0.197925
LFS_cancer_negative	TGL49_0022_Pb_n_PE_307_WG	91.8	2	0.302679
LFS_cancer_negative	TGL49_0022_Pb_n_PE_307_WG	102.05	3.37	0.547115
LFS_cancer_negative	TGL49_0022_Pb_n_PE_307_WG	111.78	3.37	0.721824
LFS_cancer_negative	TGL49_0022_Pb_n_PE_307_WG	122.37	2	0.764704
LFS_cancer_negative	TGL49_0022_Pb_n_PE_307_WG	133.77	2	0.970158
LFS_cancer_negative	TGL49_0022_Pb_n_PE_307_WG	143.41	4.76	6.91
LFS_cancer_negative	TGL49_0022_Pb_n_PE_307_WG	152.35	4.76	7.60134
LFS_cancer_negative	TGL49_0022_Pb_n_PE_307_WG	159.61	2.69	2.45927
LFS_cancer_negative	TGL49_0022_Pb_n_PE_307_WG	167.28	6.66	47.5559
LFS_cancer_negative	TGL49_0022_Pb_n_PE_307_WG	176.88	6.58	25.5207
LFS_cancer_negative	TGL49_0022_Pb_n_PE_307_WG	187.89	6.58	7.98839
LFS_cancer_negative	TGL49_0022_Pb_n_PE_307_WG	199.14	6.58	2.48995
LFS_cancer_negative	TGL49_0022_Pb_n_PE_307_WG	208.33	6.58	0.679055
LFS_cancer_negative	TGL49_0022_Pb_n_PE_307_WG	218.1	6.58	3.90799e-14
LFS_cancer_negative	TGL49_0024_Cf_U_PE_311_WG	61.07	3.07	0.0936073
LFS_cancer_negative	TGL49_0024_Cf_U_PE_311_WG	72	3.07	0.323989
LFS_cancer_negative	TGL49_0024_Cf_U_PE_311_WG	82.03	3.1	0.567577
LFS_cancer_negative	TGL49_0024_Cf_U_PE_311_WG	91.56	3.1	0.56103
LFS_cancer_negative	TGL49_0024_Cf_U_PE_311_WG	102.39	4.53	0.787953
LFS_cancer_negative	TGL49_0024_Cf_U_PE_311_WG	112.87	4.53	1.0361
LFS_cancer_negative	TGL49_0024_Cf_U_PE_311_WG	122.76	2.41	1.07541
LFS_cancer_negative	TGL49_0024_Cf_U_PE_311_WG	134.13	2.41	1.43074
LFS_cancer_negative	TGL49_0024_Cf_U_PE_311_WG	144	5.22	7.78479
LFS_cancer_negative	TGL49_0024_Cf_U_PE_311_WG	152.84	5.22	8.38282
LFS_cancer_negative	TGL49_0024_Cf_U_PE_311_WG	160.09	2.71	2.07918
LFS_cancer_negative	TGL49_0024_Cf_U_PE_311_WG	167.66	6.91	43.8255
LFS_cancer_negative	TGL49_0024_Cf_U_PE_311_WG	177.33	6.81	25.4162
LFS_cancer_negative	TGL49_0024_Cf_U_PE_311_WG	188.42	6.81	8.30091
LFS_cancer_negative	TGL49_0024_Cf_U_PE_311_WG	199.46	6.81	2.33949
LFS_cancer_negative	TGL49_0024_Cf_U_PE_311_WG	207.7	6.81	0.734301
LFS_cancer_negative	TGL49_0024_Cf_U_PE_311_WG	217	6.81	8.71792e-12
LFS_cancer_negative	TGL49_0024_Cf_U_PE_318_WG	61.57	2.93	0.0501842
LFS_cancer_negative	TGL49_0024_Cf_U_PE_318_WG	71.19	2.93	0.10576
LFS_cancer_negative	TGL49_0024_Cf_U_PE_318_WG	81.17	2.49	0.25372
LFS_cancer_negative	TGL49_0024_Cf_U_PE_318_WG	91.91	2.49	0.338011
LFS_cancer_negative	TGL49_0024_Cf_U_PE_318_WG	102.06	4.16	0.633899
LFS_cancer_negative	TGL49_0024_Cf_U_PE_318_WG	112.25	4.16	0.865793
LFS_cancer_negative	TGL49_0024_Cf_U_PE_318_WG	122.71	2.19	0.779075
LFS_cancer_negative	TGL49_0024_Cf_U_PE_318_WG	133.86	2.19	0.971318
LFS_cancer_negative	TGL49_0024_Cf_U_PE_318_WG	143.56	5.32	7.15125
LFS_cancer_negative	TGL49_0024_Cf_U_PE_318_WG	152.66	5.32	7.7785
LFS_cancer_negative	TGL49_0024_Cf_U_PE_318_WG	159.67	2.77	2.04135
LFS_cancer_negative	TGL49_0024_Cf_U_PE_318_WG	167.34	6.9	43.7684
LFS_cancer_negative	TGL49_0024_Cf_U_PE_318_WG	176.89	7.44	27.546
LFS_cancer_negative	TGL49_0024_Cf_U_PE_318_WG	188.79	7.44	8.18048
LFS_cancer_negative	TGL49_0024_Cf_U_PE_318_WG	200.39	7.44	2.92863
LFS_cancer_negative	TGL49_0024_Cf_U_PE_318_WG	210.77	7.44	1.14188
LFS_cancer_negative	TGL49_0024_Cf_U_PE_318_WG	221	7.44	0.195848
LFS_cancer_negative	TGL49_0025_Cf_U_PE_310_WG	62	3.08	6.37513e-07
LFS_cancer_negative	TGL49_0025_Cf_U_PE_310_WG	69.94	3.08	5.61529e-12
LFS_cancer_negative	TGL49_0025_Cf_U_PE_310_WG	81.78	2	0.120667
LFS_cancer_negative	TGL49_0025_Cf_U_PE_310_WG	92.08	2	0.213113
LFS_cancer_negative	TGL49_0025_Cf_U_PE_310_WG	102.32	3.01	0.402436
LFS_cancer_negative	TGL49_0025_Cf_U_PE_310_WG	111.95	3.01	0.474225
LFS_cancer_negative	TGL49_0025_Cf_U_PE_310_WG	122.58	2.01	0.596177
LFS_cancer_negative	TGL49_0025_Cf_U_PE_310_WG	134.16	2.01	0.918695
LFS_cancer_negative	TGL49_0025_Cf_U_PE_310_WG	143.76	4.99	7.46188
LFS_cancer_negative	TGL49_0025_Cf_U_PE_310_WG	152.63	4.99	8.04836
LFS_cancer_negative	TGL49_0025_Cf_U_PE_310_WG	159.83	2.92	2.53262
LFS_cancer_negative	TGL49_0025_Cf_U_PE_310_WG	167.42	6.78	46.1753
LFS_cancer_negative	TGL49_0025_Cf_U_PE_310_WG	177.01	7.39	27.1594
LFS_cancer_negative	TGL49_0025_Cf_U_PE_310_WG	188.7	7.39	7.63023
LFS_cancer_negative	TGL49_0025_Cf_U_PE_310_WG	200.56	7.39	2.5101
LFS_cancer_negative	TGL49_0025_Cf_U_PE_310_WG	210.97	7.39	0.830563
LFS_cancer_negative	TGL49_0025_Cf_U_PE_310_WG	217	7.39	6.21725e-14
LFS_cancer_negative	TGL49_0025_Cf_U_PE_316_WG	60.24	2.29	0.00234638
LFS_cancer_negative	TGL49_0025_Cf_U_PE_316_WG	70.06	2.29	0.000722143
LFS_cancer_negative	TGL49_0025_Cf_U_PE_316_WG	81.18	2.01	0.0137316
LFS_cancer_negative	TGL49_0025_Cf_U_PE_316_WG	92.42	2.01	0.10722
LFS_cancer_negative	TGL49_0025_Cf_U_PE_316_WG	102.4	2.04	0.174671
LFS_cancer_negative	TGL49_0025_Cf_U_PE_316_WG	111.54	2.04	0.195839
LFS_cancer_negative	TGL49_0025_Cf_U_PE_316_WG	122.36	2	0.353167
LFS_cancer_negative	TGL49_0025_Cf_U_PE_316_WG	134.26	2	0.615576
LFS_cancer_negative	TGL49_0025_Cf_U_PE_316_WG	143.87	4.94	6.33296
LFS_cancer_negative	TGL49_0025_Cf_U_PE_316_WG	152.93	4.94	6.16606
LFS_cancer_negative	TGL49_0025_Cf_U_PE_316_WG	159.94	6.38	0.00237605
LFS_cancer_negative	TGL49_0025_Cf_U_PE_316_WG	167.35	7.98	52.5117
LFS_cancer_negative	TGL49_0025_Cf_U_PE_316_WG	177.56	7.94	25.9675
LFS_cancer_negative	TGL49_0025_Cf_U_PE_316_WG	189.42	7.94	9.08492
LFS_cancer_negative	TGL49_0025_Cf_U_PE_316_WG	200.93	7.94	3.28738
LFS_cancer_negative	TGL49_0025_Cf_U_PE_316_WG	211	7.94	1.23119
LFS_cancer_negative	TGL49_0025_Cf_U_PE_316_WG	217.01	7.94	0.0102935
LFS_cancer_negative	TGL49_0025_Cf_U_PE_317_WG	62	6.67	1.23157
LFS_cancer_negative	TGL49_0025_Cf_U_PE_317_WG	71.35	6.67	1.61125
LFS_cancer_negative	TGL49_0025_Cf_U_PE_317_WG	82.24	2.47	0.870462
LFS_cancer_negative	TGL49_0025_Cf_U_PE_317_WG	91.38	2.47	0.846837
LFS_cancer_negative	TGL49_0025_Cf_U_PE_317_WG	102.32	4.35	1.21273
LFS_cancer_negative	TGL49_0025_Cf_U_PE_317_WG	113	4.35	1.44549
LFS_cancer_negative	TGL49_0025_Cf_U_PE_317_WG	122.58	2.39	1.43855
LFS_cancer_negative	TGL49_0025_Cf_U_PE_317_WG	134.04	2.39	1.7142
LFS_cancer_negative	TGL49_0025_Cf_U_PE_317_WG	143.73	5.1	9.4262
LFS_cancer_negative	TGL49_0025_Cf_U_PE_317_WG	152.96	5.1	8.1983
LFS_cancer_negative	TGL49_0025_Cf_U_PE_317_WG	159.78	2.51	2.25005
LFS_cancer_negative	TGL49_0025_Cf_U_PE_317_WG	167.22	6.69	39.8405
LFS_cancer_negative	TGL49_0025_Cf_U_PE_317_WG	176.61	7.6	25.9625
LFS_cancer_negative	TGL49_0025_Cf_U_PE_317_WG	188.96	7.6	6.43329
LFS_cancer_negative	TGL49_0025_Cf_U_PE_317_WG	200.83	7.6	1.85063
LFS_cancer_negative	TGL49_0025_Cf_U_PE_317_WG	207.98	7.6	0.441672
LFS_cancer_negative	TGL49_0025_Cf_U_PE_317_WG	217	7.6	0.132172
LFS_cancer_negative	TGL49_0025_Cf_U_PE_321_WG	58	8	15.7901
LFS_cancer_negative	TGL49_0025_Cf_U_PE_321_WG	72	8	1.74083e-13
LFS_cancer_negative	TGL49_0025_Cf_U_PE_321_WG	81.44	2.18	1.06435
LFS_cancer_negative	TGL49_0025_Cf_U_PE_321_WG	90.99	2.18	2.11542
LFS_cancer_negative	TGL49_0025_Cf_U_PE_321_WG	104	3.2	1.8249
LFS_cancer_negative	TGL49_0025_Cf_U_PE_321_WG	112.62	3.2	1.21113
LFS_cancer_negative	TGL49_0025_Cf_U_PE_321_WG	123.41	5.56	10.045
LFS_cancer_negative	TGL49_0025_Cf_U_PE_321_WG	132	5.56	6.37347
LFS_cancer_negative	TGL49_0025_Cf_U_PE_321_WG	140	3.72	8.42742
LFS_cancer_negative	TGL49_0025_Cf_U_PE_321_WG	150	3.72	2.66518
LFS_cancer_negative	TGL49_0025_Cf_U_PE_321_WG	157.13	2	3.8078
LFS_cancer_negative	TGL49_0025_Cf_U_PE_321_WG	165	2.12	0.715884
LFS_cancer_negative	TGL49_0025_Cf_U_PE_321_WG	175	8	20.3911
LFS_cancer_negative	TGL49_0025_Cf_U_PE_321_WG	190	8	9.40455
LFS_cancer_negative	TGL49_0025_Cf_U_PE_321_WG	198	8	3.70249
LFS_cancer_negative	TGL49_0025_Cf_U_PE_321_WG	207	8	6.49436
LFS_cancer_negative	TGL49_0025_Cf_U_PE_321_WG	221	8	10.8082
LFS_cancer_negative	TGL49_0025_Cf_U_PE_322_WG	61.96	2.05	2.96811e-06
LFS_cancer_negative	TGL49_0025_Cf_U_PE_322_WG	71.6	2.05	1.60367e-07
LFS_cancer_negative	TGL49_0025_Cf_U_PE_322_WG	81.15	2.02	0.145027
LFS_cancer_negative	TGL49_0025_Cf_U_PE_322_WG	92.33	2.02	0.234499
LFS_cancer_negative	TGL49_0025_Cf_U_PE_322_WG	102.57	2.92	0.416262
LFS_cancer_negative	TGL49_0025_Cf_U_PE_322_WG	111.79	2.92	0.461301
LFS_cancer_negative	TGL49_0025_Cf_U_PE_322_WG	122.68	2	0.61299
LFS_cancer_negative	TGL49_0025_Cf_U_PE_322_WG	134.21	2	0.951618
LFS_cancer_negative	TGL49_0025_Cf_U_PE_322_WG	143.83	4.95	7.97449
LFS_cancer_negative	TGL49_0025_Cf_U_PE_322_WG	152.58	4.95	8.26432
LFS_cancer_negative	TGL49_0025_Cf_U_PE_322_WG	159.82	2.92	2.48425
LFS_cancer_negative	TGL49_0025_Cf_U_PE_322_WG	167.41	6.68	47.4678
LFS_cancer_negative	TGL49_0025_Cf_U_PE_322_WG	176.85	7.31	26.0793
LFS_cancer_negative	TGL49_0025_Cf_U_PE_322_WG	188.88	7.31	6.54994
LFS_cancer_negative	TGL49_0025_Cf_U_PE_322_WG	200.74	7.31	2.3897
LFS_cancer_negative	TGL49_0025_Cf_U_PE_322_WG	211	7.31	0.868958
LFS_cancer_negative	TGL49_0025_Cf_U_PE_322_WG	219.03	7.31	0.00209272
LFS_cancer_negative	TGL49_0025_Pb_n_PE_311_WG	60.98	2	0.0468427
LFS_cancer_negative	TGL49_0025_Pb_n_PE_311_WG	70.52	2	0.0804582
LFS_cancer_negative	TGL49_0025_Pb_n_PE_311_WG	80.91	2.05	0.348401
LFS_cancer_negative	TGL49_0025_Pb_n_PE_311_WG	91.87	2.05	0.495366
LFS_cancer_negative	TGL49_0025_Pb_n_PE_311_WG	102.06	3.42	0.837339
LFS_cancer_negative	TGL49_0025_Pb_n_PE_311_WG	111.77	3.42	1.01343
LFS_cancer_negative	TGL49_0025_Pb_n_PE_311_WG	122.55	2	1.11996
LFS_cancer_negative	TGL49_0025_Pb_n_PE_311_WG	133.9	2	1.7223
LFS_cancer_negative	TGL49_0025_Pb_n_PE_311_WG	143.35	5.1	10.7561
LFS_cancer_negative	TGL49_0025_Pb_n_PE_311_WG	152.31	5.1	10.5767
LFS_cancer_negative	TGL49_0025_Pb_n_PE_311_WG	159.58	2.88	3.15479
LFS_cancer_negative	TGL49_0025_Pb_n_PE_311_WG	167.04	6.38	45.6929
LFS_cancer_negative	TGL49_0025_Pb_n_PE_311_WG	176.46	6.89	22.3802
LFS_cancer_negative	TGL49_0025_Pb_n_PE_311_WG	187.9	6.89	4.83
LFS_cancer_negative	TGL49_0025_Pb_n_PE_311_WG	200	6.89	1.32792
LFS_cancer_negative	TGL49_0025_Pb_n_PE_311_WG	207	6.89	0.158874
LFS_cancer_negative	TGL49_0025_Pb_n_PE_311_WG	217	6.89	7.31637e-12
LFS_cancer_negative	TGL49_0025_Pb_n_PE_421_WG	61.78	3.96	3.82361e-13
LFS_cancer_negative	TGL49_0025_Pb_n_PE_421_WG	68.21	3.96	5.99878e-07
LFS_cancer_negative	TGL49_0025_Pb_n_PE_421_WG	82.36	2	7.35878e-12
LFS_cancer_negative	TGL49_0025_Pb_n_PE_421_WG	91.79	2	7.54952e-14
LFS_cancer_negative	TGL49_0025_Pb_n_PE_421_WG	103.27	2.01	3.97238e-12
LFS_cancer_negative	TGL49_0025_Pb_n_PE_421_WG	111.83	2.01	0.0643029
LFS_cancer_negative	TGL49_0025_Pb_n_PE_421_WG	122.69	2.03	0.322235
LFS_cancer_negative	TGL49_0025_Pb_n_PE_421_WG	134.33	2.03	0.772829
LFS_cancer_negative	TGL49_0025_Pb_n_PE_421_WG	143.77	4.56	6.55914
LFS_cancer_negative	TGL49_0025_Pb_n_PE_421_WG	152.54	4.56	7.60518
LFS_cancer_negative	TGL49_0025_Pb_n_PE_421_WG	160.05	3.59	4.18472
LFS_cancer_negative	TGL49_0025_Pb_n_PE_421_WG	167.56	6.36	45.3055
LFS_cancer_negative	TGL49_0025_Pb_n_PE_421_WG	176.99	7.22	28.6872
LFS_cancer_negative	TGL49_0025_Pb_n_PE_421_WG	188.55	7.22	8.19045
LFS_cancer_negative	TGL49_0025_Pb_n_PE_421_WG	200.41	7.22	2.87558
LFS_cancer_negative	TGL49_0025_Pb_n_PE_421_WG	211	7.22	0.965166
LFS_cancer_negative	TGL49_0025_Pb_n_PE_421_WG	217.13	7.22	1.2057e-13
LFS_cancer_negative	TGL49_0026_Cf_U_PE_314_WG	59.47	3.9	5.7554e-12
LFS_cancer_negative	TGL49_0026_Cf_U_PE_314_WG	70.9	3.9	5.65548e-13
LFS_cancer_negative	TGL49_0026_Cf_U_PE_314_WG	81.77	2	0.207267
LFS_cancer_negative	TGL49_0026_Cf_U_PE_314_WG	91.89	2	0.334665
LFS_cancer_negative	TGL49_0026_Cf_U_PE_314_WG	102.3	3.61	0.696189
LFS_cancer_negative	TGL49_0026_Cf_U_PE_314_WG	112.16	3.61	0.928243
LFS_cancer_negative	TGL49_0026_Cf_U_PE_314_WG	122.6	2.15	0.899295
LFS_cancer_negative	TGL49_0026_Cf_U_PE_314_WG	133.99	2.15	1.11871
LFS_cancer_negative	TGL49_0026_Cf_U_PE_314_WG	143.66	5.31	8.31448
LFS_cancer_negative	TGL49_0026_Cf_U_PE_314_WG	152.53	5.31	8.83087
LFS_cancer_negative	TGL49_0026_Cf_U_PE_314_WG	159.53	3.18	3.3181
LFS_cancer_negative	TGL49_0026_Cf_U_PE_314_WG	167.32	6.34	45.6328
LFS_cancer_negative	TGL49_0026_Cf_U_PE_314_WG	176.55	6.95	27.3262
LFS_cancer_negative	TGL49_0026_Cf_U_PE_314_WG	188.02	6.95	5.78951
LFS_cancer_negative	TGL49_0026_Cf_U_PE_314_WG	200.06	6.95	1.45522
LFS_cancer_negative	TGL49_0026_Cf_U_PE_314_WG	207	6.95	0.019289
LFS_cancer_negative	TGL49_0026_Cf_U_PE_314_WG	217.01	6.95	1.0826e-06
LFS_cancer_negative	TGL49_0026_Cf_U_PE_320_WG	61.41	6.12	1.85407e-12
LFS_cancer_negative	TGL49_0026_Cf_U_PE_320_WG	72	6.12	0.434095
LFS_cancer_negative	TGL49_0026_Cf_U_PE_320_WG	81.95	3.41	0.810271
LFS_cancer_negative	TGL49_0026_Cf_U_PE_320_WG	91.54	3.41	0.73375
LFS_cancer_negative	TGL49_0026_Cf_U_PE_320_WG	102.2	4.46	0.928131
LFS_cancer_negative	TGL49_0026_Cf_U_PE_320_WG	112.75	4.46	1.07454
LFS_cancer_negative	TGL49_0026_Cf_U_PE_320_WG	122.67	2.3	0.941079
LFS_cancer_negative	TGL49_0026_Cf_U_PE_320_WG	134.07	2.3	1.30329
LFS_cancer_negative	TGL49_0026_Cf_U_PE_320_WG	143.64	5.05	7.48195
LFS_cancer_negative	TGL49_0026_Cf_U_PE_320_WG	152.85	5.05	8.21432
LFS_cancer_negative	TGL49_0026_Cf_U_PE_320_WG	159.74	2.84	2.83781
LFS_cancer_negative	TGL49_0026_Cf_U_PE_320_WG	167.38	6.44	44.678
LFS_cancer_negative	TGL49_0026_Cf_U_PE_320_WG	176.83	7.04	26.2352
LFS_cancer_negative	TGL49_0026_Cf_U_PE_320_WG	188.41	7.04	6.55395
LFS_cancer_negative	TGL49_0026_Cf_U_PE_320_WG	200.13	7.04	1.87814
LFS_cancer_negative	TGL49_0026_Cf_U_PE_320_WG	208.91	7.04	0.511165
LFS_cancer_negative	TGL49_0026_Cf_U_PE_320_WG	217.05	7.04	5.30842e-08
LFS_cancer_negative	TGL49_0028_Cf_U_PE_311_WG	62	3.98	0.0326515
LFS_cancer_negative	TGL49_0028_Cf_U_PE_311_WG	71.91	3.98	0.206611
LFS_cancer_negative	TGL49_0028_Cf_U_PE_311_WG	81.17	2.55	0.509308
LFS_cancer_negative	TGL49_0028_Cf_U_PE_311_WG	92.02	2.55	0.685757
LFS_cancer_negative	TGL49_0028_Cf_U_PE_311_WG	102.2	3.61	0.894301
LFS_cancer_negative	TGL49_0028_Cf_U_PE_311_WG	112.21	3.61	1.16761
LFS_cancer_negative	TGL49_0028_Cf_U_PE_311_WG	122.77	2.16	1.27477
LFS_cancer_negative	TGL49_0028_Cf_U_PE_311_WG	134.08	2.16	1.58043
LFS_cancer_negative	TGL49_0028_Cf_U_PE_311_WG	143.48	5.08	8.62188
LFS_cancer_negative	TGL49_0028_Cf_U_PE_311_WG	152.59	5.08	8.43592
LFS_cancer_negative	TGL49_0028_Cf_U_PE_311_WG	159.78	3.03	2.94002
LFS_cancer_negative	TGL49_0028_Cf_U_PE_311_WG	167.42	6.42	43.9536
LFS_cancer_negative	TGL49_0028_Cf_U_PE_311_WG	176.98	6.78	24.6037
LFS_cancer_negative	TGL49_0028_Cf_U_PE_311_WG	188.1	6.78	7.31131
LFS_cancer_negative	TGL49_0028_Cf_U_PE_311_WG	199.52	6.78	2.08184
LFS_cancer_negative	TGL49_0028_Cf_U_PE_311_WG	207	6.78	0.391868
LFS_cancer_negative	TGL49_0028_Cf_U_PE_311_WG	220.46	6.78	2.27594e-07
LFS_cancer_negative	TGL49_0029_Cf_U_PE_360_WG	62	2.49	0.0568971
LFS_cancer_negative	TGL49_0029_Cf_U_PE_360_WG	70.92	2.49	0.194068
LFS_cancer_negative	TGL49_0029_Cf_U_PE_360_WG	81.18	2.47	0.521318
LFS_cancer_negative	TGL49_0029_Cf_U_PE_360_WG	92.04	2.47	0.732027
LFS_cancer_negative	TGL49_0029_Cf_U_PE_360_WG	102.24	3.41	0.957619
LFS_cancer_negative	TGL49_0029_Cf_U_PE_360_WG	112.27	3.41	1.32646
LFS_cancer_negative	TGL49_0029_Cf_U_PE_360_WG	122.82	2.31	1.63059
LFS_cancer_negative	TGL49_0029_Cf_U_PE_360_WG	134.03	2.31	1.8429
LFS_cancer_negative	TGL49_0029_Cf_U_PE_360_WG	143.82	5.2	9.234
LFS_cancer_negative	TGL49_0029_Cf_U_PE_360_WG	152.83	5.2	8.4858
LFS_cancer_negative	TGL49_0029_Cf_U_PE_360_WG	160.11	3.45	3.08803
LFS_cancer_negative	TGL49_0029_Cf_U_PE_360_WG	167.51	6.98	37.6073
LFS_cancer_negative	TGL49_0029_Cf_U_PE_360_WG	177.04	7.35	26.2898
LFS_cancer_negative	TGL49_0029_Cf_U_PE_360_WG	188.16	7.35	9.13099
LFS_cancer_negative	TGL49_0029_Cf_U_PE_360_WG	199.34	7.35	2.784
LFS_cancer_negative	TGL49_0029_Cf_U_PE_360_WG	208.51	7.35	0.938712
LFS_cancer_negative	TGL49_0029_Cf_U_PE_360_WG	217	7.35	2.51468e-07
LFS_cancer_negative	TGL49_0029_Cf_n_PE_321_WG	61.47	2	0.0199841
LFS_cancer_negative	TGL49_0029_Cf_n_PE_321_WG	71.05	2	0.134616
LFS_cancer_negative	TGL49_0029_Cf_n_PE_321_WG	81.16	2.41	0.470878
LFS_cancer_negative	TGL49_0029_Cf_n_PE_321_WG	92.06	2.41	0.647219
LFS_cancer_negative	TGL49_0029_Cf_n_PE_321_WG	102.24	3.59	0.933562
LFS_cancer_negative	TGL49_0029_Cf_n_PE_321_WG	112.26	3.59	1.19459
LFS_cancer_negative	TGL49_0029_Cf_n_PE_321_WG	122.79	2.25	1.35287
LFS_cancer_negative	TGL49_0029_Cf_n_PE_321_WG	134.05	2.25	1.67735
LFS_cancer_negative	TGL49_0029_Cf_n_PE_321_WG	143.8	5.16	8.8157
LFS_cancer_negative	TGL49_0029_Cf_n_PE_321_WG	152.76	5.16	8.60723
LFS_cancer_negative	TGL49_0029_Cf_n_PE_321_WG	160.07	3.36	3.34201
LFS_cancer_negative	TGL49_0029_Cf_n_PE_321_WG	167.56	6.72	39.4107
LFS_cancer_negative	TGL49_0029_Cf_n_PE_321_WG	177.01	7.02	26.2753
LFS_cancer_negative	TGL49_0029_Cf_n_PE_321_WG	188.01	7.02	8.6105
LFS_cancer_negative	TGL49_0029_Cf_n_PE_321_WG	199.3	7.02	2.50534
LFS_cancer_negative	TGL49_0029_Cf_n_PE_321_WG	207.65	7.02	0.747919
LFS_cancer_negative	TGL49_0029_Cf_n_PE_321_WG	217.03	7.02	7.8476e-07
LFS_cancer_negative	TGL49_0029_Cf_n_PE_335_WG	60.58	2.19	2.26907e-12
LFS_cancer_negative	TGL49_0029_Cf_n_PE_335_WG	70.78	2.19	0.112343
LFS_cancer_negative	TGL49_0029_Cf_n_PE_335_WG	81.17	2.35	0.374527
LFS_cancer_negative	TGL49_0029_Cf_n_PE_335_WG	92.06	2.35	0.531424
LFS_cancer_negative	TGL49_0029_Cf_n_PE_335_WG	102.24	3.44	0.769339
LFS_cancer_negative	TGL49_0029_Cf_n_PE_335_WG	112.23	3.44	1.01317
LFS_cancer_negative	TGL49_0029_Cf_n_PE_335_WG	122.75	2.15	1.16099
LFS_cancer_negative	TGL49_0029_Cf_n_PE_335_WG	134.06	2.15	1.42178
LFS_cancer_negative	TGL49_0029_Cf_n_PE_335_WG	143.8	5.03	7.77245
LFS_cancer_negative	TGL49_0029_Cf_n_PE_335_WG	152.64	5.03	7.45874
LFS_cancer_negative	TGL49_0029_Cf_n_PE_335_WG	161	5.23	7.83366
LFS_cancer_negative	TGL49_0029_Cf_n_PE_335_WG	167.86	5.98	29.6751
LFS_cancer_negative	TGL49_0029_Cf_n_PE_335_WG	176.89	7.46	31.304
LFS_cancer_negative	TGL49_0029_Cf_n_PE_335_WG	188.35	7.46	10.5616
LFS_cancer_negative	TGL49_0029_Cf_n_PE_335_WG	199.73	7.46	3.62594
LFS_cancer_negative	TGL49_0029_Cf_n_PE_335_WG	209.97	7.46	1.11495
LFS_cancer_negative	TGL49_0029_Cf_n_PE_335_WG	217	7.46	7.53844e-07
LFS_cancer_negative	TGL49_0030_Cf_U_PE_313_WG	61.48	2.77	1.42597e-12
LFS_cancer_negative	TGL49_0030_Cf_U_PE_313_WG	71.63	2.77	0.110798
LFS_cancer_negative	TGL49_0030_Cf_U_PE_313_WG	81.55	2.71	0.321803
LFS_cancer_negative	TGL49_0030_Cf_U_PE_313_WG	92.16	2.71	0.484847
LFS_cancer_negative	TGL49_0030_Cf_U_PE_313_WG	102.36	3.4	0.588584
LFS_cancer_negative	TGL49_0030_Cf_U_PE_313_WG	112.29	3.4	0.80013
LFS_cancer_negative	TGL49_0030_Cf_U_PE_313_WG	122.87	2	0.904858
LFS_cancer_negative	TGL49_0030_Cf_U_PE_313_WG	134.15	2	1.14855
LFS_cancer_negative	TGL49_0030_Cf_U_PE_313_WG	143.65	5.09	7.1687
LFS_cancer_negative	TGL49_0030_Cf_U_PE_313_WG	152.75	5.09	7.13661
LFS_cancer_negative	TGL49_0030_Cf_U_PE_313_WG	159.87	2.9	2.18613
LFS_cancer_negative	TGL49_0030_Cf_U_PE_313_WG	167.6	6.64	43.6634
LFS_cancer_negative	TGL49_0030_Cf_U_PE_313_WG	177.12	7.01	28.46
LFS_cancer_negative	TGL49_0030_Cf_U_PE_313_WG	188.15	7.01	8.8699
LFS_cancer_negative	TGL49_0030_Cf_U_PE_313_WG	199.39	7.01	2.50929
LFS_cancer_negative	TGL49_0030_Cf_U_PE_313_WG	207.83	7.01	0.603573
LFS_cancer_negative	TGL49_0030_Cf_U_PE_313_WG	217.01	7.01	1.98395e-10
LFS_cancer_negative	TGL49_0031_Cf_n_PE_379_WG	62	5.36	5.88935e-08
LFS_cancer_negative	TGL49_0031_Cf_n_PE_379_WG	70.37	5.36	6.39933e-13
LFS_cancer_negative	TGL49_0031_Cf_n_PE_379_WG	81.2	2.03	0.18973
LFS_cancer_negative	TGL49_0031_Cf_n_PE_379_WG	92.1	2.03	0.278496
LFS_cancer_negative	TGL49_0031_Cf_n_PE_379_WG	102.24	2.95	0.419681
LFS_cancer_negative	TGL49_0031_Cf_n_PE_379_WG	111.95	2.95	0.530931
LFS_cancer_negative	TGL49_0031_Cf_n_PE_379_WG	122.66	2	0.641231
LFS_cancer_negative	TGL49_0031_Cf_n_PE_379_WG	134.09	2	0.779123
LFS_cancer_negative	TGL49_0031_Cf_n_PE_379_WG	143.85	4.79	5.26594
LFS_cancer_negative	TGL49_0031_Cf_n_PE_379_WG	152.7	4.79	6.43541
LFS_cancer_negative	TGL49_0031_Cf_n_PE_379_WG	160.23	3.3	3.06078
LFS_cancer_negative	TGL49_0031_Cf_n_PE_379_WG	167.72	6.5	36.4157
LFS_cancer_negative	TGL49_0031_Cf_n_PE_379_WG	177.11	7.24	32.7366
LFS_cancer_negative	TGL49_0031_Cf_n_PE_379_WG	188.34	7.24	12.3602
LFS_cancer_negative	TGL49_0031_Cf_n_PE_379_WG	199.55	7.24	4.37883
LFS_cancer_negative	TGL49_0031_Cf_n_PE_379_WG	209.89	7.24	1.51142
LFS_cancer_negative	TGL49_0031_Cf_n_PE_379_WG	217.51	7.24	7.83817e-13
LFS_cancer_negative	TGL49_0031_Cf_n_PE_551_WG	60.97	2	7.53819e-12
LFS_cancer_negative	TGL49_0031_Cf_n_PE_551_WG	71.22	2	0.0381287
LFS_cancer_negative	TGL49_0031_Cf_n_PE_551_WG	81.25	2	0.202033
LFS_cancer_negative	TGL49_0031_Cf_n_PE_551_WG	92.06	2	0.293039
LFS_cancer_negative	TGL49_0031_Cf_n_PE_551_WG	102.22	3.23	0.460563
LFS_cancer_negative	TGL49_0031_Cf_n_PE_551_WG	112.07	3.23	0.639775
LFS_cancer_negative	TGL49_0031_Cf_n_PE_551_WG	122.74	2	0.74626
LFS_cancer_negative	TGL49_0031_Cf_n_PE_551_WG	134.06	2	0.909938
LFS_cancer_negative	TGL49_0031_Cf_n_PE_551_WG	143.88	4.88	5.54224
LFS_cancer_negative	TGL49_0031_Cf_n_PE_551_WG	152.74	4.88	6.3071
LFS_cancer_negative	TGL49_0031_Cf_n_PE_551_WG	160.22	3.25	2.77041
LFS_cancer_negative	TGL49_0031_Cf_n_PE_551_WG	167.66	6.56	34.2977
LFS_cancer_negative	TGL49_0031_Cf_n_PE_551_WG	177.11	7.4	32.5881
LFS_cancer_negative	TGL49_0031_Cf_n_PE_551_WG	188.39	7.4	12.8907
LFS_cancer_negative	TGL49_0031_Cf_n_PE_551_WG	199.59	7.4	5.1313
LFS_cancer_negative	TGL49_0031_Cf_n_PE_551_WG	210.11	7.4	1.89376
LFS_cancer_negative	TGL49_0031_Cf_n_PE_551_WG	218.44	7.4	0.279436
LFS_cancer_negative	TGL49_0033_Cf_U_PE_313_WG	60.97	2	0.00250147
LFS_cancer_negative	TGL49_0033_Cf_U_PE_313_WG	70.81	2	0.108493
LFS_cancer_negative	TGL49_0033_Cf_U_PE_313_WG	81.06	2.29	0.351145
LFS_cancer_negative	TGL49_0033_Cf_U_PE_313_WG	92.02	2.29	0.520047
LFS_cancer_negative	TGL49_0033_Cf_U_PE_313_WG	102.25	3.32	0.739586
LFS_cancer_negative	TGL49_0033_Cf_U_PE_313_WG	112.09	3.32	1.04458
LFS_cancer_negative	TGL49_0033_Cf_U_PE_313_WG	122.78	2.14	1.25785
LFS_cancer_negative	TGL49_0033_Cf_U_PE_313_WG	134.05	2.14	1.47512
LFS_cancer_negative	TGL49_0033_Cf_U_PE_313_WG	143.64	5.11	8.52442
LFS_cancer_negative	TGL49_0033_Cf_U_PE_313_WG	152.74	5.11	8.62259
LFS_cancer_negative	TGL49_0033_Cf_U_PE_313_WG	159.97	3	2.45044
LFS_cancer_negative	TGL49_0033_Cf_U_PE_313_WG	167.53	6.92	43.0402
LFS_cancer_negative	TGL49_0033_Cf_U_PE_313_WG	177.21	7.23	25.8326
LFS_cancer_negative	TGL49_0033_Cf_U_PE_313_WG	188.34	7.23	8.02061
LFS_cancer_negative	TGL49_0033_Cf_U_PE_313_WG	199.65	7.23	2.21033
LFS_cancer_negative	TGL49_0033_Cf_U_PE_313_WG	208.95	7.23	0.587065
LFS_cancer_negative	TGL49_0033_Cf_U_PE_313_WG	217	7.23	2.8968e-07
LFS_cancer_negative	TGL49_0034_Cf_n_PE_412_WG	60.78	2	2.55351e-13
LFS_cancer_negative	TGL49_0034_Cf_n_PE_412_WG	71.33	2	0.00591002
LFS_cancer_negative	TGL49_0034_Cf_n_PE_412_WG	81.43	2	0.136109
LFS_cancer_negative	TGL49_0034_Cf_n_PE_412_WG	92.16	2	0.27506
LFS_cancer_negative	TGL49_0034_Cf_n_PE_412_WG	102.42	3.54	0.559185
LFS_cancer_negative	TGL49_0034_Cf_n_PE_412_WG	111.94	3.54	0.725754
LFS_cancer_negative	TGL49_0034_Cf_n_PE_412_WG	122.73	2	0.770639
LFS_cancer_negative	TGL49_0034_Cf_n_PE_412_WG	134.12	2	1.22485
LFS_cancer_negative	TGL49_0034_Cf_n_PE_412_WG	143.42	5.24	9.24103
LFS_cancer_negative	TGL49_0034_Cf_n_PE_412_WG	152.54	5.24	9.19661
LFS_cancer_negative	TGL49_0034_Cf_n_PE_412_WG	159.7	3.05	3.00859
LFS_cancer_negative	TGL49_0034_Cf_n_PE_412_WG	167.29	6.5	51.8859
LFS_cancer_negative	TGL49_0034_Cf_n_PE_412_WG	176.64	6.75	22.0661
LFS_cancer_negative	TGL49_0034_Cf_n_PE_412_WG	187.8	6.75	4.72019
LFS_cancer_negative	TGL49_0034_Cf_n_PE_412_WG	198.96	6.75	1.0763
LFS_cancer_negative	TGL49_0034_Cf_n_PE_412_WG	207	6.75	2.86549e-12
LFS_cancer_negative	TGL49_0034_Cf_n_PE_412_WG	217	6.75	7.80265e-13
LFS_cancer_negative	TGL49_0034_Cf_n_PE_619_WG	61.12	2.57	6.45084e-12
LFS_cancer_negative	TGL49_0034_Cf_n_PE_619_WG	71.15	2.57	0.0799201
LFS_cancer_negative	TGL49_0034_Cf_n_PE_619_WG	81.1	2.37	0.328741
LFS_cancer_negative	TGL49_0034_Cf_n_PE_619_WG	92.1	2.37	0.449387
LFS_cancer_negative	TGL49_0034_Cf_n_PE_619_WG	102.31	4	0.832632
LFS_cancer_negative	TGL49_0034_Cf_n_PE_619_WG	112.17	4	1.10914
LFS_cancer_negative	TGL49_0034_Cf_n_PE_619_WG	122.81	2.16	1.13911
LFS_cancer_negative	TGL49_0034_Cf_n_PE_619_WG	134.08	2.16	1.70587
LFS_cancer_negative	TGL49_0034_Cf_n_PE_619_WG	143.39	5.33	10.8813
LFS_cancer_negative	TGL49_0034_Cf_n_PE_619_WG	152.68	5.33	9.7141
LFS_cancer_negative	TGL49_0034_Cf_n_PE_619_WG	159.74	2.99	2.81674
LFS_cancer_negative	TGL49_0034_Cf_n_PE_619_WG	167.21	6.57	49.9171
LFS_cancer_negative	TGL49_0034_Cf_n_PE_619_WG	176.5	6.94	20.7655
LFS_cancer_negative	TGL49_0034_Cf_n_PE_619_WG	187.81	6.94	3.95198
LFS_cancer_negative	TGL49_0034_Cf_n_PE_619_WG	199.81	6.94	0.994981
LFS_cancer_negative	TGL49_0034_Cf_n_PE_619_WG	207	6.94	0.0104207
LFS_cancer_negative	TGL49_0034_Cf_n_PE_619_WG	217.04	6.94	3.26872e-12
LFS_cancer_negative	TGL49_0035_Cf_U_PE_310_WG	59.12	2	8.77787e-12
LFS_cancer_negative	TGL49_0035_Cf_U_PE_310_WG	71.9	2	0.0678414
LFS_cancer_negative	TGL49_0035_Cf_U_PE_310_WG	81.9	2	0.231056
LFS_cancer_negative	TGL49_0035_Cf_U_PE_310_WG	91.88	2	0.281871
LFS_cancer_negative	TGL49_0035_Cf_U_PE_310_WG	102.08	2.93	0.459338
LFS_cancer_negative	TGL49_0035_Cf_U_PE_310_WG	111.71	2.93	0.466447
LFS_cancer_negative	TGL49_0035_Cf_U_PE_310_WG	122.57	2	0.571151
LFS_cancer_negative	TGL49_0035_Cf_U_PE_310_WG	134.2	2	0.891091
LFS_cancer_negative	TGL49_0035_Cf_U_PE_310_WG	143.74	4.29	5.53281
LFS_cancer_negative	TGL49_0035_Cf_U_PE_310_WG	152.98	4.29	6.66137
LFS_cancer_negative	TGL49_0035_Cf_U_PE_310_WG	160.56	3.2	3.77815
LFS_cancer_negative	TGL49_0035_Cf_U_PE_310_WG	167.43	5.99	31.2366
LFS_cancer_negative	TGL49_0035_Cf_U_PE_310_WG	176.79	8	34.9787
LFS_cancer_negative	TGL49_0035_Cf_U_PE_310_WG	188.72	8	12.6925
LFS_cancer_negative	TGL49_0035_Cf_U_PE_310_WG	200.21	8	4.95315
LFS_cancer_negative	TGL49_0035_Cf_U_PE_310_WG	210.17	8	1.81616
LFS_cancer_negative	TGL49_0035_Cf_U_PE_310_WG	218.29	8	0.5492
LFS_cancer_negative	TGL49_0036_Cf_U_PE_317_WG	62	4.96	0.103643
LFS_cancer_negative	TGL49_0036_Cf_U_PE_317_WG	71.47	4.96	0.626227
LFS_cancer_negative	TGL49_0036_Cf_U_PE_317_WG	81.26	3.59	1.01563
LFS_cancer_negative	TGL49_0036_Cf_U_PE_317_WG	91.94	3.59	1.20751
LFS_cancer_negative	TGL49_0036_Cf_U_PE_317_WG	102.29	4.07	1.2943
LFS_cancer_negative	TGL49_0036_Cf_U_PE_317_WG	112.3	4.07	1.6039
LFS_cancer_negative	TGL49_0036_Cf_U_PE_317_WG	122.78	2.56	1.65751
LFS_cancer_negative	TGL49_0036_Cf_U_PE_317_WG	133.99	2.56	1.8417
LFS_cancer_negative	TGL49_0036_Cf_U_PE_317_WG	143.56	5.17	7.83667
LFS_cancer_negative	TGL49_0036_Cf_U_PE_317_WG	152.78	5.17	7.60396
LFS_cancer_negative	TGL49_0036_Cf_U_PE_317_WG	160.06	2.89	2.14928
LFS_cancer_negative	TGL49_0036_Cf_U_PE_317_WG	167.39	6.68	34.3409
LFS_cancer_negative	TGL49_0036_Cf_U_PE_317_WG	177.13	7.62	27.3653
LFS_cancer_negative	TGL49_0036_Cf_U_PE_317_WG	188.73	7.62	10.1655
LFS_cancer_negative	TGL49_0036_Cf_U_PE_317_WG	199.9	7.62	3.97348
LFS_cancer_negative	TGL49_0036_Cf_U_PE_317_WG	210.55	7.62	1.58709
LFS_cancer_negative	TGL49_0036_Cf_U_PE_317_WG	221	7.62	0.406463
LFS_cancer_negative	TGL49_0037_Cf_U_PE_315_WG	62	3.95	0.0444261
LFS_cancer_negative	TGL49_0037_Cf_U_PE_315_WG	71.3	3.95	0.334783
LFS_cancer_negative	TGL49_0037_Cf_U_PE_315_WG	81.36	2.7	0.584434
LFS_cancer_negative	TGL49_0037_Cf_U_PE_315_WG	92.23	2.7	0.790851
LFS_cancer_negative	TGL49_0037_Cf_U_PE_315_WG	102.31	4.13	1.21227
LFS_cancer_negative	TGL49_0037_Cf_U_PE_315_WG	112.31	4.13	1.51178
LFS_cancer_negative	TGL49_0037_Cf_U_PE_315_WG	122.9	2.55	1.66524
LFS_cancer_negative	TGL49_0037_Cf_U_PE_315_WG	134	2.55	2.20085
LFS_cancer_negative	TGL49_0037_Cf_U_PE_315_WG	143.22	5.58	10.0031
LFS_cancer_negative	TGL49_0037_Cf_U_PE_315_WG	152.61	5.58	10.3312
LFS_cancer_negative	TGL49_0037_Cf_U_PE_315_WG	159.78	3.06	3.2505
LFS_cancer_negative	TGL49_0037_Cf_U_PE_315_WG	167.2	6.14	38.4209
LFS_cancer_negative	TGL49_0037_Cf_U_PE_315_WG	176.64	7.01	25.0995
LFS_cancer_negative	TGL49_0037_Cf_U_PE_315_WG	188.18	7.01	6.97337
LFS_cancer_negative	TGL49_0037_Cf_U_PE_315_WG	200.55	7.01	2.10724
LFS_cancer_negative	TGL49_0037_Cf_U_PE_315_WG	207.02	7.01	2.07279e-12
LFS_cancer_negative	TGL49_0037_Cf_U_PE_315_WG	217	7.01	5.79536e-13
LFS_cancer_negative	TGL49_0038_Cf_U_PE_302_WG	60.99	7.6	2.64011e-12
LFS_cancer_negative	TGL49_0038_Cf_U_PE_302_WG	70.65	7.6	5.99454e-12
LFS_cancer_negative	TGL49_0038_Cf_U_PE_302_WG	82.45	4.41	0.848265
LFS_cancer_negative	TGL49_0038_Cf_U_PE_302_WG	91.88	4.41	0.872433
LFS_cancer_negative	TGL49_0038_Cf_U_PE_302_WG	102.08	5.69	1.56817
LFS_cancer_negative	TGL49_0038_Cf_U_PE_302_WG	112.51	5.69	2.23829
LFS_cancer_negative	TGL49_0038_Cf_U_PE_302_WG	122.83	3.04	1.58176
LFS_cancer_negative	TGL49_0038_Cf_U_PE_302_WG	133.93	3.04	1.7815
LFS_cancer_negative	TGL49_0038_Cf_U_PE_302_WG	143.56	5.91	9.96956
LFS_cancer_negative	TGL49_0038_Cf_U_PE_302_WG	152.29	5.91	9.8499
LFS_cancer_negative	TGL49_0038_Cf_U_PE_302_WG	159.4	3.8	4.00411
LFS_cancer_negative	TGL49_0038_Cf_U_PE_302_WG	167.06	6.15	49.6802
LFS_cancer_negative	TGL49_0038_Cf_U_PE_302_WG	175.34	6.53	20.6783
LFS_cancer_negative	TGL49_0038_Cf_U_PE_302_WG	186.6	6.53	2.09234
LFS_cancer_negative	TGL49_0038_Cf_U_PE_302_WG	198.48	6.53	2.83262e-12
LFS_cancer_negative	TGL49_0038_Cf_U_PE_302_WG	210.69	6.53	4.33609e-12
LFS_cancer_negative	TGL49_0038_Cf_U_PE_302_WG	220.99	6.53	1.21414e-12
LFS_cancer_negative	TGL49_0039_Cf_U_PE_316_WG	61.46	2.45	1.74372e-12
LFS_cancer_negative	TGL49_0039_Cf_U_PE_316_WG	71.65	2.45	0.13446
LFS_cancer_negative	TGL49_0039_Cf_U_PE_316_WG	81.21	2.6	0.406047
LFS_cancer_negative	TGL49_0039_Cf_U_PE_316_WG	92.06	2.6	0.534996
LFS_cancer_negative	TGL49_0039_Cf_U_PE_316_WG	102.21	3.53	0.68458
LFS_cancer_negative	TGL49_0039_Cf_U_PE_316_WG	112.18	3.53	0.897094
LFS_cancer_negative	TGL49_0039_Cf_U_PE_316_WG	122.83	2.14	1.00596
LFS_cancer_negative	TGL49_0039_Cf_U_PE_316_WG	134.14	2.14	1.26197
LFS_cancer_negative	TGL49_0039_Cf_U_PE_316_WG	143.71	5.05	6.73098
LFS_cancer_negative	TGL49_0039_Cf_U_PE_316_WG	152.84	5.05	6.98008
LFS_cancer_negative	TGL49_0039_Cf_U_PE_316_WG	160.02	2.83	2.10329
LFS_cancer_negative	TGL49_0039_Cf_U_PE_316_WG	167.59	6.75	39.6912
LFS_cancer_negative	TGL49_0039_Cf_U_PE_316_WG	177.23	7.43	29.8009
LFS_cancer_negative	TGL49_0039_Cf_U_PE_316_WG	188.63	7.43	10.2887
LFS_cancer_negative	TGL49_0039_Cf_U_PE_316_WG	199.85	7.43	3.35951
LFS_cancer_negative	TGL49_0039_Cf_U_PE_316_WG	209.99	7.43	1.09544
LFS_cancer_negative	TGL49_0039_Cf_U_PE_316_WG	217	7.43	9.17989e-08
LFS_cancer_negative	TGL49_0039_Cf_n_PE_518_WG	62	2	6.66134e-15
LFS_cancer_negative	TGL49_0039_Cf_n_PE_518_WG	70.66	2	0.0417702
LFS_cancer_negative	TGL49_0039_Cf_n_PE_518_WG	81.29	2.65	0.246382
LFS_cancer_negative	TGL49_0039_Cf_n_PE_518_WG	92.07	2.65	0.341766
LFS_cancer_negative	TGL49_0039_Cf_n_PE_518_WG	102.22	3.33	0.424083
LFS_cancer_negative	TGL49_0039_Cf_n_PE_518_WG	112.08	3.33	0.556792
LFS_cancer_negative	TGL49_0039_Cf_n_PE_518_WG	122.86	2	0.683804
LFS_cancer_negative	TGL49_0039_Cf_n_PE_518_WG	134.2	2	1.01263
LFS_cancer_negative	TGL49_0039_Cf_n_PE_518_WG	143.67	5.15	6.23498
LFS_cancer_negative	TGL49_0039_Cf_n_PE_518_WG	152.77	5.15	6.5989
LFS_cancer_negative	TGL49_0039_Cf_n_PE_518_WG	159.91	2.69	1.73331
LFS_cancer_negative	TGL49_0039_Cf_n_PE_518_WG	167.68	6.83	43.8572
LFS_cancer_negative	TGL49_0039_Cf_n_PE_518_WG	177.25	7.23	29.4642
LFS_cancer_negative	TGL49_0039_Cf_n_PE_518_WG	188.5	7.23	9.90553
LFS_cancer_negative	TGL49_0039_Cf_n_PE_518_WG	199.72	7.23	3.04978
LFS_cancer_negative	TGL49_0039_Cf_n_PE_518_WG	209.16	7.23	0.907471
LFS_cancer_negative	TGL49_0039_Cf_n_PE_518_WG	217.06	7.23	8.99236e-12
LFS_cancer_negative	TGL49_0039_Cf_n_PE_569_WG	61.45	3.78	0.0993698
LFS_cancer_negative	TGL49_0039_Cf_n_PE_569_WG	71.53	3.78	0.369099
LFS_cancer_negative	TGL49_0039_Cf_n_PE_569_WG	81.29	2.85	0.623413
LFS_cancer_negative	TGL49_0039_Cf_n_PE_569_WG	92.14	2.85	0.805097
LFS_cancer_negative	TGL49_0039_Cf_n_PE_569_WG	102.26	3.61	0.933913
LFS_cancer_negative	TGL49_0039_Cf_n_PE_569_WG	112.33	3.61	1.20993
LFS_cancer_negative	TGL49_0039_Cf_n_PE_569_WG	122.88	2.33	1.39754
LFS_cancer_negative	TGL49_0039_Cf_n_PE_569_WG	134.09	2.33	1.68092
LFS_cancer_negative	TGL49_0039_Cf_n_PE_569_WG	143.6	5.15	7.63856
LFS_cancer_negative	TGL49_0039_Cf_n_PE_569_WG	152.81	5.15	7.59612
LFS_cancer_negative	TGL49_0039_Cf_n_PE_569_WG	159.93	2.89	2.21119
LFS_cancer_negative	TGL49_0039_Cf_n_PE_569_WG	167.51	6.82	39.9708
LFS_cancer_negative	TGL49_0039_Cf_n_PE_569_WG	177.22	7.31	27.3142
LFS_cancer_negative	TGL49_0039_Cf_n_PE_569_WG	188.48	7.31	9.38372
LFS_cancer_negative	TGL49_0039_Cf_n_PE_569_WG	199.63	7.31	2.84524
LFS_cancer_negative	TGL49_0039_Cf_n_PE_569_WG	208.68	7.31	0.820238
LFS_cancer_negative	TGL49_0039_Cf_n_PE_569_WG	217	7.31	3.3199e-06
LFS_cancer_negative	TGL49_0039_Cf_n_PE_680_WG	62	3.54	2.4647e-14
LFS_cancer_negative	TGL49_0039_Cf_n_PE_680_WG	71.83	3.54	0.173387
LFS_cancer_negative	TGL49_0039_Cf_n_PE_680_WG	81.2	2.71	0.348762
LFS_cancer_negative	TGL49_0039_Cf_n_PE_680_WG	92.14	2.71	0.463513
LFS_cancer_negative	TGL49_0039_Cf_n_PE_680_WG	102.2	3.66	0.627253
LFS_cancer_negative	TGL49_0039_Cf_n_PE_680_WG	112.2	3.66	0.816082
LFS_cancer_negative	TGL49_0039_Cf_n_PE_680_WG	122.85	2.08	0.886237
LFS_cancer_negative	TGL49_0039_Cf_n_PE_680_WG	134.13	2.08	1.21021
LFS_cancer_negative	TGL49_0039_Cf_n_PE_680_WG	143.66	5.09	7.02125
LFS_cancer_negative	TGL49_0039_Cf_n_PE_680_WG	152.82	5.09	7.31641
LFS_cancer_negative	TGL49_0039_Cf_n_PE_680_WG	160.05	2.87	2.16469
LFS_cancer_negative	TGL49_0039_Cf_n_PE_680_WG	167.59	6.89	42.1214
LFS_cancer_negative	TGL49_0039_Cf_n_PE_680_WG	177.35	7.41	27.8481
LFS_cancer_negative	TGL49_0039_Cf_n_PE_680_WG	188.78	7.41	9.77156
LFS_cancer_negative	TGL49_0039_Cf_n_PE_680_WG	200.02	7.41	3.13577
LFS_cancer_negative	TGL49_0039_Cf_n_PE_680_WG	210.35	7.41	1.01555
LFS_cancer_negative	TGL49_0039_Cf_n_PE_680_WG	217	7.41	1.56595e-10
LFS_cancer_negative	TGL49_0040_Cf_U_PE_316_WG	62	3.5	0.138918
LFS_cancer_negative	TGL49_0040_Cf_U_PE_316_WG	71.25	3.5	0.323749
LFS_cancer_negative	TGL49_0040_Cf_U_PE_316_WG	81.18	2.62	0.560366
LFS_cancer_negative	TGL49_0040_Cf_U_PE_316_WG	92.06	2.62	0.73733
LFS_cancer_negative	TGL49_0040_Cf_U_PE_316_WG	102.26	3.84	1.03202
LFS_cancer_negative	TGL49_0040_Cf_U_PE_316_WG	112.21	3.84	1.39684
LFS_cancer_negative	TGL49_0040_Cf_U_PE_316_WG	122.83	2.41	1.44266
LFS_cancer_negative	TGL49_0040_Cf_U_PE_316_WG	134.04	2.41	1.77062
LFS_cancer_negative	TGL49_0040_Cf_U_PE_316_WG	143.46	5.17	8.268
LFS_cancer_negative	TGL49_0040_Cf_U_PE_316_WG	152.72	5.17	7.23082
LFS_cancer_negative	TGL49_0040_Cf_U_PE_316_WG	160.04	2.66	1.70327
LFS_cancer_negative	TGL49_0040_Cf_U_PE_316_WG	167.53	6.93	39.6944
LFS_cancer_negative	TGL49_0040_Cf_U_PE_316_WG	177.09	7.67	27.005
LFS_cancer_negative	TGL49_0040_Cf_U_PE_316_WG	188.87	7.67	8.79476
LFS_cancer_negative	TGL49_0040_Cf_U_PE_316_WG	200.28	7.67	3.35747
LFS_cancer_negative	TGL49_0040_Cf_U_PE_316_WG	210.96	7.67	1.27787
LFS_cancer_negative	TGL49_0040_Cf_U_PE_316_WG	219.21	7.67	0.134162
LFS_cancer_negative	TGL49_0041_Cf_U_PE_317_WG	61.39	2	2.72293e-12
LFS_cancer_negative	TGL49_0041_Cf_U_PE_317_WG	70.52	2	0.00193926
LFS_cancer_negative	TGL49_0041_Cf_U_PE_317_WG	81.48	2	0.170183
LFS_cancer_negative	TGL49_0041_Cf_U_PE_317_WG	92.23	2	0.249457
LFS_cancer_negative	TGL49_0041_Cf_U_PE_317_WG	102.32	2.83	0.375945
LFS_cancer_negative	TGL49_0041_Cf_U_PE_317_WG	111.8	2.83	0.426896
LFS_cancer_negative	TGL49_0041_Cf_U_PE_317_WG	122.78	2	0.59543
LFS_cancer_negative	TGL49_0041_Cf_U_PE_317_WG	134.27	2	1.06938
LFS_cancer_negative	TGL49_0041_Cf_U_PE_317_WG	143.69	4.91	7.28665
LFS_cancer_negative	TGL49_0041_Cf_U_PE_317_WG	152.61	4.91	7.76275
LFS_cancer_negative	TGL49_0041_Cf_U_PE_317_WG	160.14	3.89	4.42079
LFS_cancer_negative	TGL49_0041_Cf_U_PE_317_WG	167.52	6.26	41.181
LFS_cancer_negative	TGL49_0041_Cf_U_PE_317_WG	176.83	7.68	30.2583
LFS_cancer_negative	TGL49_0041_Cf_U_PE_317_WG	188.82	7.68	8.39877
LFS_cancer_negative	TGL49_0041_Cf_U_PE_317_WG	200.88	7.68	2.68066
LFS_cancer_negative	TGL49_0041_Cf_U_PE_317_WG	211	7.68	0.187566
LFS_cancer_negative	TGL49_0041_Cf_U_PE_317_WG	217.04	7.68	2.41698e-05
LFS_cancer_negative	TGL49_0042_Cf_U_PE_317_WG	61.99	2	0.0116407
LFS_cancer_negative	TGL49_0042_Cf_U_PE_317_WG	70.47	2	0.0817202
LFS_cancer_negative	TGL49_0042_Cf_U_PE_317_WG	81.19	2.38	0.384468
LFS_cancer_negative	TGL49_0042_Cf_U_PE_317_WG	92.17	2.38	0.466857
LFS_cancer_negative	TGL49_0042_Cf_U_PE_317_WG	102.3	3.55	0.677202
LFS_cancer_negative	TGL49_0042_Cf_U_PE_317_WG	112.14	3.55	0.872319
LFS_cancer_negative	TGL49_0042_Cf_U_PE_317_WG	122.79	2.02	0.900979
LFS_cancer_negative	TGL49_0042_Cf_U_PE_317_WG	134.11	2.02	1.1708
LFS_cancer_negative	TGL49_0042_Cf_U_PE_317_WG	143.66	5.04	7.24288
LFS_cancer_negative	TGL49_0042_Cf_U_PE_317_WG	152.71	5.04	7.42125
LFS_cancer_negative	TGL49_0042_Cf_U_PE_317_WG	160.1	2.88	2.36687
LFS_cancer_negative	TGL49_0042_Cf_U_PE_317_WG	167.69	6.69	42.7808
LFS_cancer_negative	TGL49_0042_Cf_U_PE_317_WG	177.16	7.1	28.5374
LFS_cancer_negative	TGL49_0042_Cf_U_PE_317_WG	188.44	7.1	8.61591
LFS_cancer_negative	TGL49_0042_Cf_U_PE_317_WG	200.03	7.1	2.55888
LFS_cancer_negative	TGL49_0042_Cf_U_PE_317_WG	208.94	7.1	0.765441
LFS_cancer_negative	TGL49_0042_Cf_U_PE_317_WG	217.01	7.1	7.925e-08
LFS_cancer_negative	TGL49_0043_Cf_U_PE_321_WG	61.57	2	2.30038e-13
LFS_cancer_negative	TGL49_0043_Cf_U_PE_321_WG	71.07	2	0.0534007
LFS_cancer_negative	TGL49_0043_Cf_U_PE_321_WG	81.51	2.33	0.274119
LFS_cancer_negative	TGL49_0043_Cf_U_PE_321_WG	91.97	2.33	0.380637
LFS_cancer_negative	TGL49_0043_Cf_U_PE_321_WG	102.15	3.66	0.617801
LFS_cancer_negative	TGL49_0043_Cf_U_PE_321_WG	111.88	3.66	0.795118
LFS_cancer_negative	TGL49_0043_Cf_U_PE_321_WG	122.68	2	0.721182
LFS_cancer_negative	TGL49_0043_Cf_U_PE_321_WG	134.04	2	0.943775
LFS_cancer_negative	TGL49_0043_Cf_U_PE_321_WG	143.35	5.07	6.292
LFS_cancer_negative	TGL49_0043_Cf_U_PE_321_WG	152.42	5.07	7.49306
LFS_cancer_negative	TGL49_0043_Cf_U_PE_321_WG	159.69	2.83	2.48166
LFS_cancer_negative	TGL49_0043_Cf_U_PE_321_WG	167.4	6.45	43.0262
LFS_cancer_negative	TGL49_0043_Cf_U_PE_321_WG	177.07	6.94	28.8885
LFS_cancer_negative	TGL49_0043_Cf_U_PE_321_WG	188.26	6.94	9.56796
LFS_cancer_negative	TGL49_0043_Cf_U_PE_321_WG	199.11	6.94	2.81561
LFS_cancer_negative	TGL49_0043_Cf_U_PE_321_WG	207	6.94	0.552418
LFS_cancer_negative	TGL49_0043_Cf_U_PE_321_WG	217.22	6.94	2.50688e-12
LFS_cancer_negative	TGL49_0044_Cf_U_PE_322_WG	61.41	4.86	5.87117e-10
LFS_cancer_negative	TGL49_0044_Cf_U_PE_322_WG	71.04	4.86	2.49646e-07
LFS_cancer_negative	TGL49_0044_Cf_U_PE_322_WG	81.46	2.03	0.0929937
LFS_cancer_negative	TGL49_0044_Cf_U_PE_322_WG	92.29	2.03	0.202892
LFS_cancer_negative	TGL49_0044_Cf_U_PE_322_WG	102.22	2.66	0.295396
LFS_cancer_negative	TGL49_0044_Cf_U_PE_322_WG	111.67	2.66	0.355436
LFS_cancer_negative	TGL49_0044_Cf_U_PE_322_WG	122.69	2	0.517583
LFS_cancer_negative	TGL49_0044_Cf_U_PE_322_WG	134.22	2	0.773616
LFS_cancer_negative	TGL49_0044_Cf_U_PE_322_WG	143.5	4.34	5.1687
LFS_cancer_negative	TGL49_0044_Cf_U_PE_322_WG	152.14	4.34	5.72815
LFS_cancer_negative	TGL49_0044_Cf_U_PE_322_WG	160.47	5.34	8.21975
LFS_cancer_negative	TGL49_0044_Cf_U_PE_322_WG	167.79	5.78	35.224
LFS_cancer_negative	TGL49_0044_Cf_U_PE_322_WG	176.91	7.25	34.2045
LFS_cancer_negative	TGL49_0044_Cf_U_PE_322_WG	188.35	7.25	10.3321
LFS_cancer_negative	TGL49_0044_Cf_U_PE_322_WG	200.25	7.25	3.07964
LFS_cancer_negative	TGL49_0044_Cf_U_PE_322_WG	209.89	7.25	0.764434
LFS_cancer_negative	TGL49_0044_Cf_U_PE_322_WG	217.8	7.25	1.5708e-09
LFS_cancer_negative	TGL49_0044_Cf_n_PE_558_WG	60.58	2.07	4.51728e-12
LFS_cancer_negative	TGL49_0044_Cf_n_PE_558_WG	70.4	2.07	4.70113e-12
LFS_cancer_negative	TGL49_0044_Cf_n_PE_558_WG	81.19	2	0.094943
LFS_cancer_negative	TGL49_0044_Cf_n_PE_558_WG	92.24	2	0.230328
LFS_cancer_negative	TGL49_0044_Cf_n_PE_558_WG	102.28	3.1	0.413628
LFS_cancer_negative	TGL49_0044_Cf_n_PE_558_WG	111.72	3.1	0.509287
LFS_cancer_negative	TGL49_0044_Cf_n_PE_558_WG	122.69	2	0.618331
LFS_cancer_negative	TGL49_0044_Cf_n_PE_558_WG	134.15	2	0.940148
LFS_cancer_negative	TGL49_0044_Cf_n_PE_558_WG	143.5	4.81	7.04091
LFS_cancer_negative	TGL49_0044_Cf_n_PE_558_WG	152.47	4.81	7.85599
LFS_cancer_negative	TGL49_0044_Cf_n_PE_558_WG	160.24	4	5.95016
LFS_cancer_negative	TGL49_0044_Cf_n_PE_558_WG	167.34	5.49	35.1043
LFS_cancer_negative	TGL49_0044_Cf_n_PE_558_WG	176.01	7.78	35.6171
LFS_cancer_negative	TGL49_0044_Cf_n_PE_558_WG	187.98	7.78	7.53823
LFS_cancer_negative	TGL49_0044_Cf_n_PE_558_WG	199.9	7.78	2.35027
LFS_cancer_negative	TGL49_0044_Cf_n_PE_558_WG	208.24	7.78	0.683698
LFS_cancer_negative	TGL49_0044_Cf_n_PE_558_WG	217	7.78	7.24976e-12
LFS_cancer_negative	TGL49_0045_Cf_U_PE_321_WG	61.57	2.27	4.34541e-13
LFS_cancer_negative	TGL49_0045_Cf_U_PE_321_WG	70.22	2.27	3.5083e-14
LFS_cancer_negative	TGL49_0045_Cf_U_PE_321_WG	81.22	2	0.132604
LFS_cancer_negative	TGL49_0045_Cf_U_PE_321_WG	92.13	2	0.241889
LFS_cancer_negative	TGL49_0045_Cf_U_PE_321_WG	102.38	3.13	0.443385
LFS_cancer_negative	TGL49_0045_Cf_U_PE_321_WG	111.82	3.13	0.602948
LFS_cancer_negative	TGL49_0045_Cf_U_PE_321_WG	122.65	2	0.674904
LFS_cancer_negative	TGL49_0045_Cf_U_PE_321_WG	134.07	2	0.914969
LFS_cancer_negative	TGL49_0045_Cf_U_PE_321_WG	143.57	4.95	6.46894
LFS_cancer_negative	TGL49_0045_Cf_U_PE_321_WG	152.59	4.95	7.63081
LFS_cancer_negative	TGL49_0045_Cf_U_PE_321_WG	159.87	3.12	3.18521
LFS_cancer_negative	TGL49_0045_Cf_U_PE_321_WG	167.47	6.46	40.9482
LFS_cancer_negative	TGL49_0045_Cf_U_PE_321_WG	177.23	7.08	29.7964
LFS_cancer_negative	TGL49_0045_Cf_U_PE_321_WG	188.39	7.08	10.4572
LFS_cancer_negative	TGL49_0045_Cf_U_PE_321_WG	199.18	7.08	2.86631
LFS_cancer_negative	TGL49_0045_Cf_U_PE_321_WG	207	7.08	0.682466
LFS_cancer_negative	TGL49_0045_Cf_U_PE_321_WG	217	7.08	5.81797e-08
LFS_cancer_negative	TGL49_0046_Cf_U_PE_315_WG	61.86	2.42	0.0523911
LFS_cancer_negative	TGL49_0046_Cf_U_PE_315_WG	71.51	2.42	0.155941
LFS_cancer_negative	TGL49_0046_Cf_U_PE_315_WG	81.08	2.42	0.375518
LFS_cancer_negative	TGL49_0046_Cf_U_PE_315_WG	92.02	2.42	0.43558
LFS_cancer_negative	TGL49_0046_Cf_U_PE_315_WG	102.17	3.34	0.541461
LFS_cancer_negative	TGL49_0046_Cf_U_PE_315_WG	112.07	3.34	0.718039
LFS_cancer_negative	TGL49_0046_Cf_U_PE_315_WG	122.77	2	0.78313
LFS_cancer_negative	TGL49_0046_Cf_U_PE_315_WG	134.15	2	1.06204
LFS_cancer_negative	TGL49_0046_Cf_U_PE_315_WG	143.73	5.23	6.66575
LFS_cancer_negative	TGL49_0046_Cf_U_PE_315_WG	152.73	5.23	6.70375
LFS_cancer_negative	TGL49_0046_Cf_U_PE_315_WG	159.9	2.77	1.99364
LFS_cancer_negative	TGL49_0046_Cf_U_PE_315_WG	167.7	6.53	40.6418
LFS_cancer_negative	TGL49_0046_Cf_U_PE_315_WG	177.07	7.21	31.5246
LFS_cancer_negative	TGL49_0046_Cf_U_PE_315_WG	188.29	7.21	9.58665
LFS_cancer_negative	TGL49_0046_Cf_U_PE_315_WG	199.98	7.21	2.78759
LFS_cancer_negative	TGL49_0046_Cf_U_PE_315_WG	209.44	7.21	0.79959
LFS_cancer_negative	TGL49_0046_Cf_U_PE_315_WG	217.51	7.21	3.52696e-12
LFS_cancer_negative	TGL49_0047_Cf_U_PE_316_WG	62	3.36	0.00993505
LFS_cancer_negative	TGL49_0047_Cf_U_PE_316_WG	70.78	3.36	0.220805
LFS_cancer_negative	TGL49_0047_Cf_U_PE_316_WG	81.14	2.5	0.414833
LFS_cancer_negative	TGL49_0047_Cf_U_PE_316_WG	92.02	2.5	0.526522
LFS_cancer_negative	TGL49_0047_Cf_U_PE_316_WG	102.3	3.68	0.741867
LFS_cancer_negative	TGL49_0047_Cf_U_PE_316_WG	112.21	3.68	1.00464
LFS_cancer_negative	TGL49_0047_Cf_U_PE_316_WG	122.71	2.19	1.00092
LFS_cancer_negative	TGL49_0047_Cf_U_PE_316_WG	134.02	2.19	1.24583
LFS_cancer_negative	TGL49_0047_Cf_U_PE_316_WG	143.67	5.17	7.31681
LFS_cancer_negative	TGL49_0047_Cf_U_PE_316_WG	152.69	5.17	7.70614
LFS_cancer_negative	TGL49_0047_Cf_U_PE_316_WG	160.14	3.2	2.92612
LFS_cancer_negative	TGL49_0047_Cf_U_PE_316_WG	167.59	6.56	36.9713
LFS_cancer_negative	TGL49_0047_Cf_U_PE_316_WG	177.1	7.33	29.6207
LFS_cancer_negative	TGL49_0047_Cf_U_PE_316_WG	188.63	7.33	10.2135
LFS_cancer_negative	TGL49_0047_Cf_U_PE_316_WG	200.14	7.33	3.56563
LFS_cancer_negative	TGL49_0047_Cf_U_PE_316_WG	210.74	7.33	1.23698
LFS_cancer_negative	TGL49_0047_Cf_U_PE_316_WG	217.33	7.33	0.0139926
LFS_cancer_negative	TGL49_0048_Cf_U_PE_313_WG	58.28	2.11	7.34446e-08
LFS_cancer_negative	TGL49_0048_Cf_U_PE_313_WG	69.04	2.11	4.6585e-13
LFS_cancer_negative	TGL49_0048_Cf_U_PE_313_WG	81.26	2.06	0.244139
LFS_cancer_negative	TGL49_0048_Cf_U_PE_313_WG	92.15	2.06	0.372312
LFS_cancer_negative	TGL49_0048_Cf_U_PE_313_WG	102.21	3.33	0.610249
LFS_cancer_negative	TGL49_0048_Cf_U_PE_313_WG	112.11	3.33	0.841137
LFS_cancer_negative	TGL49_0048_Cf_U_PE_313_WG	122.76	2	0.964126
LFS_cancer_negative	TGL49_0048_Cf_U_PE_313_WG	134.11	2	1.1809
LFS_cancer_negative	TGL49_0048_Cf_U_PE_313_WG	143.67	4.97	7.72232
LFS_cancer_negative	TGL49_0048_Cf_U_PE_313_WG	152.7	4.97	7.89219
LFS_cancer_negative	TGL49_0048_Cf_U_PE_313_WG	159.93	2.96	2.6296
LFS_cancer_negative	TGL49_0048_Cf_U_PE_313_WG	167.57	6.77	43.4103
LFS_cancer_negative	TGL49_0048_Cf_U_PE_313_WG	177.25	7.1	26.9373
LFS_cancer_negative	TGL49_0048_Cf_U_PE_313_WG	188.51	7.1	8.79891
LFS_cancer_negative	TGL49_0048_Cf_U_PE_313_WG	199.86	7.1	2.65311
LFS_cancer_negative	TGL49_0048_Cf_U_PE_313_WG	209.04	7.1	0.602722
LFS_cancer_negative	TGL49_0048_Cf_U_PE_313_WG	217.03	7.1	1.26787e-13
LFS_cancer_negative	TGL49_0049_Cf_U_PE_323_WG	60.56	2.72	3.74489e-08
LFS_cancer_negative	TGL49_0049_Cf_U_PE_323_WG	71.23	2.72	0.151107
LFS_cancer_negative	TGL49_0049_Cf_U_PE_323_WG	81.18	2.48	0.40769
LFS_cancer_negative	TGL49_0049_Cf_U_PE_323_WG	92.11	2.48	0.519082
LFS_cancer_negative	TGL49_0049_Cf_U_PE_323_WG	102.27	3.23	0.617561
LFS_cancer_negative	TGL49_0049_Cf_U_PE_323_WG	112.13	3.23	0.798388
LFS_cancer_negative	TGL49_0049_Cf_U_PE_323_WG	122.86	2	0.988967
LFS_cancer_negative	TGL49_0049_Cf_U_PE_323_WG	134.16	2	1.2929
LFS_cancer_negative	TGL49_0049_Cf_U_PE_323_WG	143.75	4.87	6.98653
LFS_cancer_negative	TGL49_0049_Cf_U_PE_323_WG	152.87	4.87	6.98525
LFS_cancer_negative	TGL49_0049_Cf_U_PE_323_WG	160.04	2.94	2.4777
LFS_cancer_negative	TGL49_0049_Cf_U_PE_323_WG	167.71	6.63	39.4622
LFS_cancer_negative	TGL49_0049_Cf_U_PE_323_WG	177.31	7.39	30.0986
LFS_cancer_negative	TGL49_0049_Cf_U_PE_323_WG	188.64	7.39	9.85802
LFS_cancer_negative	TGL49_0049_Cf_U_PE_323_WG	200.3	7.39	3.11727
LFS_cancer_negative	TGL49_0049_Cf_U_PE_323_WG	210.45	7.39	1.051
LFS_cancer_negative	TGL49_0049_Cf_U_PE_323_WG	217.01	7.39	3.97038e-12
LFS_cancer_negative	TGL49_0052_Cf_U_PE_330_WG	61.74	5.97	8.6394e-06
LFS_cancer_negative	TGL49_0052_Cf_U_PE_330_WG	71.53	5.97	1.21508e-08
LFS_cancer_negative	TGL49_0052_Cf_U_PE_330_WG	81.53	2	0.159969
LFS_cancer_negative	TGL49_0052_Cf_U_PE_330_WG	92.31	2	0.295378
LFS_cancer_negative	TGL49_0052_Cf_U_PE_330_WG	102.41	2.98	0.517943
LFS_cancer_negative	TGL49_0052_Cf_U_PE_330_WG	111.84	2.98	0.633328
LFS_cancer_negative	TGL49_0052_Cf_U_PE_330_WG	122.72	2	0.665589
LFS_cancer_negative	TGL49_0052_Cf_U_PE_330_WG	134.23	2	1.0567
LFS_cancer_negative	TGL49_0052_Cf_U_PE_330_WG	143.67	4.79	7.0801
LFS_cancer_negative	TGL49_0052_Cf_U_PE_330_WG	152.71	4.79	7.68982
LFS_cancer_negative	TGL49_0052_Cf_U_PE_330_WG	160.1	3.7	4.3482
LFS_cancer_negative	TGL49_0052_Cf_U_PE_330_WG	167.59	6.18	41.6326
LFS_cancer_negative	TGL49_0052_Cf_U_PE_330_WG	177.06	6.85	28.2
LFS_cancer_negative	TGL49_0052_Cf_U_PE_330_WG	188.27	6.85	9.09951
LFS_cancer_negative	TGL49_0052_Cf_U_PE_330_WG	199.47	6.85	2.80828
LFS_cancer_negative	TGL49_0052_Cf_U_PE_330_WG	208.55	6.85	0.711921
LFS_cancer_negative	TGL49_0052_Cf_U_PE_330_WG	217.5	6.85	1.8008e-06
LFS_cancer_negative	TGL49_0052_Cf_n_PE_500_WG	58.99	2	1.18994e-12
LFS_cancer_negative	TGL49_0052_Cf_n_PE_500_WG	70.99	2	0.0449777
LFS_cancer_negative	TGL49_0052_Cf_n_PE_500_WG	81.26	2.26	0.279306
LFS_cancer_negative	TGL49_0052_Cf_n_PE_500_WG	92.21	2.26	0.365296
LFS_cancer_negative	TGL49_0052_Cf_n_PE_500_WG	102.31	3.41	0.576806
LFS_cancer_negative	TGL49_0052_Cf_n_PE_500_WG	111.95	3.41	0.706504
LFS_cancer_negative	TGL49_0052_Cf_n_PE_500_WG	122.78	2	0.717568
LFS_cancer_negative	TGL49_0052_Cf_n_PE_500_WG	134.21	2	1.12019
LFS_cancer_negative	TGL49_0052_Cf_n_PE_500_WG	143.6	5.14	7.15538
LFS_cancer_negative	TGL49_0052_Cf_n_PE_500_WG	152.72	5.14	7.06636
LFS_cancer_negative	TGL49_0052_Cf_n_PE_500_WG	159.96	3.07	2.37614
LFS_cancer_negative	TGL49_0052_Cf_n_PE_500_WG	167.73	6.89	44.6233
LFS_cancer_negative	TGL49_0052_Cf_n_PE_500_WG	177.42	7.08	26.9964
LFS_cancer_negative	TGL49_0052_Cf_n_PE_500_WG	188.55	7.08	9.39016
LFS_cancer_negative	TGL49_0052_Cf_n_PE_500_WG	199.72	7.08	2.89759
LFS_cancer_negative	TGL49_0052_Cf_n_PE_500_WG	208.61	7.08	0.74717
LFS_cancer_negative	TGL49_0052_Cf_n_PE_500_WG	217.3	7.08	3.42926e-12
LFS_cancer_negative	TGL49_0054_Cf_U_PE_330_WG	61.44	2.2	2.58566e-08
LFS_cancer_negative	TGL49_0054_Cf_U_PE_330_WG	70.37	2.2	4.41647e-13
LFS_cancer_negative	TGL49_0054_Cf_U_PE_330_WG	81.33	2	0.176392
LFS_cancer_negative	TGL49_0054_Cf_U_PE_330_WG	92.18	2	0.275706
LFS_cancer_negative	TGL49_0054_Cf_U_PE_330_WG	102.39	2.76	0.407879
LFS_cancer_negative	TGL49_0054_Cf_U_PE_330_WG	111.99	2.76	0.504772
LFS_cancer_negative	TGL49_0054_Cf_U_PE_330_WG	122.71	2	0.629788
LFS_cancer_negative	TGL49_0054_Cf_U_PE_330_WG	134.19	2	1.00468
LFS_cancer_negative	TGL49_0054_Cf_U_PE_330_WG	143.9	5.07	6.94546
LFS_cancer_negative	TGL49_0054_Cf_U_PE_330_WG	152.81	5.07	7.52637
LFS_cancer_negative	TGL49_0054_Cf_U_PE_330_WG	159.83	3.36	3.12781
LFS_cancer_negative	TGL49_0054_Cf_U_PE_330_WG	167.54	6.47	43.495
LFS_cancer_negative	TGL49_0054_Cf_U_PE_330_WG	176.72	7.11	29.6617
LFS_cancer_negative	TGL49_0054_Cf_U_PE_330_WG	188.17	7.11	7.95989
LFS_cancer_negative	TGL49_0054_Cf_U_PE_330_WG	199.79	7.11	2.5097
LFS_cancer_negative	TGL49_0054_Cf_U_PE_330_WG	209.25	7.11	0.695052
LFS_cancer_negative	TGL49_0054_Cf_U_PE_330_WG	217	7.11	1.32117e-12
LFS_cancer_negative	TGL49_0055_Cf_U_PE_332_WG	61.6	5.8	7.93102e-05
LFS_cancer_negative	TGL49_0055_Cf_U_PE_332_WG	70.9	5.8	2.5735e-13
LFS_cancer_negative	TGL49_0055_Cf_U_PE_332_WG	81.25	2	0.204913
LFS_cancer_negative	TGL49_0055_Cf_U_PE_332_WG	92.25	2	0.317677
LFS_cancer_negative	TGL49_0055_Cf_U_PE_332_WG	102.3	2.76	0.443243
LFS_cancer_negative	TGL49_0055_Cf_U_PE_332_WG	111.87	2.76	0.526131
LFS_cancer_negative	TGL49_0055_Cf_U_PE_332_WG	122.78	2	0.78616
LFS_cancer_negative	TGL49_0055_Cf_U_PE_332_WG	134.21	2	1.21425
LFS_cancer_negative	TGL49_0055_Cf_U_PE_332_WG	143.77	4.79	7.56138
LFS_cancer_negative	TGL49_0055_Cf_U_PE_332_WG	152.74	4.79	7.93561
LFS_cancer_negative	TGL49_0055_Cf_U_PE_332_WG	159.96	3.21	3.27256
LFS_cancer_negative	TGL49_0055_Cf_U_PE_332_WG	167.53	6.57	43.546
LFS_cancer_negative	TGL49_0055_Cf_U_PE_332_WG	177	7.03	27.3592
LFS_cancer_negative	TGL49_0055_Cf_U_PE_332_WG	188.18	7.03	8.50631
LFS_cancer_negative	TGL49_0055_Cf_U_PE_332_WG	199.68	7.03	2.52636
LFS_cancer_negative	TGL49_0055_Cf_U_PE_332_WG	208.53	7.03	0.677135
LFS_cancer_negative	TGL49_0055_Cf_U_PE_332_WG	217.07	7.03	6.22536e-06
LFS_cancer_negative	TGL49_0056_Cf_U_PE_320_WG	62	3.07	0.194962
LFS_cancer_negative	TGL49_0056_Cf_U_PE_320_WG	71.11	3.07	0.359874
LFS_cancer_negative	TGL49_0056_Cf_U_PE_320_WG	81.07	2.59	0.691927
LFS_cancer_negative	TGL49_0056_Cf_U_PE_320_WG	92.01	2.59	0.905538
LFS_cancer_negative	TGL49_0056_Cf_U_PE_320_WG	102.08	3.44	1.05419
LFS_cancer_negative	TGL49_0056_Cf_U_PE_320_WG	112.19	3.44	1.37046
LFS_cancer_negative	TGL49_0056_Cf_U_PE_320_WG	122.78	2.24	1.56437
LFS_cancer_negative	TGL49_0056_Cf_U_PE_320_WG	134.06	2.24	1.76285
LFS_cancer_negative	TGL49_0056_Cf_U_PE_320_WG	143.56	5	8.11735
LFS_cancer_negative	TGL49_0056_Cf_U_PE_320_WG	152.76	5	7.50279
LFS_cancer_negative	TGL49_0056_Cf_U_PE_320_WG	160.01	2.81	2.10174
LFS_cancer_negative	TGL49_0056_Cf_U_PE_320_WG	167.61	6.95	41.4162
LFS_cancer_negative	TGL49_0056_Cf_U_PE_320_WG	177.28	7.31	25.924
LFS_cancer_negative	TGL49_0056_Cf_U_PE_320_WG	188.66	7.31	8.19026
LFS_cancer_negative	TGL49_0056_Cf_U_PE_320_WG	199.99	7.31	2.6461
LFS_cancer_negative	TGL49_0056_Cf_U_PE_320_WG	210.33	7.31	0.916112
LFS_cancer_negative	TGL49_0056_Cf_U_PE_320_WG	217	7.31	6.44599e-06
LFS_cancer_negative	TGL49_0057_Cf_U_PE_327_WG	60.15	2.13	6.03346e-05
LFS_cancer_negative	TGL49_0057_Cf_U_PE_327_WG	69.75	2.13	1.51988e-06
LFS_cancer_negative	TGL49_0057_Cf_U_PE_327_WG	80.78	3.5	7.14903e-10
LFS_cancer_negative	TGL49_0057_Cf_U_PE_327_WG	92.11	3.5	6.43434e-07
LFS_cancer_negative	TGL49_0057_Cf_U_PE_327_WG	102.82	3.54	2.25029e-05
LFS_cancer_negative	TGL49_0057_Cf_U_PE_327_WG	112.38	3.54	7.92029e-05
LFS_cancer_negative	TGL49_0057_Cf_U_PE_327_WG	122.59	2	0.171999
LFS_cancer_negative	TGL49_0057_Cf_U_PE_327_WG	134.37	2	0.706024
LFS_cancer_negative	TGL49_0057_Cf_U_PE_327_WG	143.87	4.77	6.46896
LFS_cancer_negative	TGL49_0057_Cf_U_PE_327_WG	152.51	4.77	7.52851
LFS_cancer_negative	TGL49_0057_Cf_U_PE_327_WG	159.66	3.58	3.55701
LFS_cancer_negative	TGL49_0057_Cf_U_PE_327_WG	167.65	6.79	54.8231
LFS_cancer_negative	TGL49_0057_Cf_U_PE_327_WG	177.1	6.42	23.9055
LFS_cancer_negative	TGL49_0057_Cf_U_PE_327_WG	188.16	6.42	6.475
LFS_cancer_negative	TGL49_0057_Cf_U_PE_327_WG	199.33	6.42	1.93385
LFS_cancer_negative	TGL49_0057_Cf_U_PE_327_WG	207.82	6.42	0.425271
LFS_cancer_negative	TGL49_0057_Cf_U_PE_327_WG	217	6.42	0.00532404
LFS_cancer_negative	TGL49_0058_Cf_U_PE_327_WG	60.94	3.12	4.91318e-12
LFS_cancer_negative	TGL49_0058_Cf_U_PE_327_WG	69.59	3.12	2.28795e-12
LFS_cancer_negative	TGL49_0058_Cf_U_PE_327_WG	81.09	7.1	9.63452e-13
LFS_cancer_negative	TGL49_0058_Cf_U_PE_327_WG	93.48	7.1	5.5318e-12
LFS_cancer_negative	TGL49_0058_Cf_U_PE_327_WG	102.12	8	6.6176e-12
LFS_cancer_negative	TGL49_0058_Cf_U_PE_327_WG	112.59	8	5.41212e-12
LFS_cancer_negative	TGL49_0058_Cf_U_PE_327_WG	122.92	2.02	0.0212286
LFS_cancer_negative	TGL49_0058_Cf_U_PE_327_WG	134.53	2.02	0.508978
LFS_cancer_negative	TGL49_0058_Cf_U_PE_327_WG	144	4.3	4.70026
LFS_cancer_negative	TGL49_0058_Cf_U_PE_327_WG	152.68	4.3	6.01202
LFS_cancer_negative	TGL49_0058_Cf_U_PE_327_WG	160.14	3.88	4.38458
LFS_cancer_negative	TGL49_0058_Cf_U_PE_327_WG	167.68	6.16	40.0174
LFS_cancer_negative	TGL49_0058_Cf_U_PE_327_WG	176.98	7.22	33.378
LFS_cancer_negative	TGL49_0058_Cf_U_PE_327_WG	188.36	7.22	11.3629
LFS_cancer_negative	TGL49_0058_Cf_U_PE_327_WG	199.72	7.22	3.95548
LFS_cancer_negative	TGL49_0058_Cf_U_PE_327_WG	209.68	7.22	1.36986
LFS_cancer_negative	TGL49_0058_Cf_U_PE_327_WG	217	7.22	0.235298
LFS_cancer_negative	TGL49_0058_Cf_n_PE_361_WG	61.79	2.05	1.19837e-12
LFS_cancer_negative	TGL49_0058_Cf_n_PE_361_WG	70.7	2.05	0.067824
LFS_cancer_negative	TGL49_0058_Cf_n_PE_361_WG	81.1	2.55	0.359737
LFS_cancer_negative	TGL49_0058_Cf_n_PE_361_WG	92.24	2.55	0.408512
LFS_cancer_negative	TGL49_0058_Cf_n_PE_361_WG	102.36	3.67	0.640809
LFS_cancer_negative	TGL49_0058_Cf_n_PE_361_WG	112.09	3.67	0.799553
LFS_cancer_negative	TGL49_0058_Cf_n_PE_361_WG	122.86	2.03	0.872645
LFS_cancer_negative	TGL49_0058_Cf_n_PE_361_WG	134.16	2.03	1.36032
LFS_cancer_negative	TGL49_0058_Cf_n_PE_361_WG	143.61	5.26	9.37802
LFS_cancer_negative	TGL49_0058_Cf_n_PE_361_WG	152.65	5.26	9.22372
LFS_cancer_negative	TGL49_0058_Cf_n_PE_361_WG	159.84	2.98	2.63081
LFS_cancer_negative	TGL49_0058_Cf_n_PE_361_WG	167.35	6.65	47.097
LFS_cancer_negative	TGL49_0058_Cf_n_PE_361_WG	176.68	7.12	23.7497
LFS_cancer_negative	TGL49_0058_Cf_n_PE_361_WG	188.16	7.12	5.81642
LFS_cancer_negative	TGL49_0058_Cf_n_PE_361_WG	199.92	7.12	1.84275
LFS_cancer_negative	TGL49_0058_Cf_n_PE_361_WG	208.88	7.12	0.493207
LFS_cancer_negative	TGL49_0058_Cf_n_PE_361_WG	217.02	7.12	2.0273e-08
LFS_cancer_negative	TGL49_0058_Cf_n_PE_365_WG	60.15	3.87	2.13651e-12
LFS_cancer_negative	TGL49_0058_Cf_n_PE_365_WG	71.05	3.87	0.0340049
LFS_cancer_negative	TGL49_0058_Cf_n_PE_365_WG	81.14	2.28	0.163497
LFS_cancer_negative	TGL49_0058_Cf_n_PE_365_WG	92.27	2.28	0.26805
LFS_cancer_negative	TGL49_0058_Cf_n_PE_365_WG	102.38	3.13	0.398166
LFS_cancer_negative	TGL49_0058_Cf_n_PE_365_WG	111.78	3.13	0.459888
LFS_cancer_negative	TGL49_0058_Cf_n_PE_365_WG	122.81	2	0.546022
LFS_cancer_negative	TGL49_0058_Cf_n_PE_365_WG	134.28	2	0.883477
LFS_cancer_negative	TGL49_0058_Cf_n_PE_365_WG	143.73	4.94	6.54516
LFS_cancer_negative	TGL49_0058_Cf_n_PE_365_WG	152.61	4.94	7.15571
LFS_cancer_negative	TGL49_0058_Cf_n_PE_365_WG	159.75	2.57	1.72323
LFS_cancer_negative	TGL49_0058_Cf_n_PE_365_WG	167.83	7.24	54.668
LFS_cancer_negative	TGL49_0058_Cf_n_PE_365_WG	177.39	6.3	22.5185
LFS_cancer_negative	TGL49_0058_Cf_n_PE_365_WG	187.82	6.3	6.98296
LFS_cancer_negative	TGL49_0058_Cf_n_PE_365_WG	198.66	6.3	2.02196
LFS_cancer_negative	TGL49_0058_Cf_n_PE_365_WG	207.36	6.3	0.655721
LFS_cancer_negative	TGL49_0058_Cf_n_PE_365_WG	217	6.3	7.76623e-12
LFS_cancer_negative	TGL49_0059_Cf_U_PE_324_WG	61.03	3.32	0.207038
LFS_cancer_negative	TGL49_0059_Cf_U_PE_324_WG	70.56	3.32	0.344653
LFS_cancer_negative	TGL49_0059_Cf_U_PE_324_WG	81.03	2.73	0.628426
LFS_cancer_negative	TGL49_0059_Cf_U_PE_324_WG	91.83	2.73	0.889682
LFS_cancer_negative	TGL49_0059_Cf_U_PE_324_WG	102.17	3.42	1.09513
LFS_cancer_negative	TGL49_0059_Cf_U_PE_324_WG	112.11	3.42	1.50347
LFS_cancer_negative	TGL49_0059_Cf_U_PE_324_WG	122.69	2.78	1.87785
LFS_cancer_negative	TGL49_0059_Cf_U_PE_324_WG	133.86	2.78	2.08776
LFS_cancer_negative	TGL49_0059_Cf_U_PE_324_WG	143.59	4.88	5.87219
LFS_cancer_negative	TGL49_0059_Cf_U_PE_324_WG	152.96	4.88	6.45599
LFS_cancer_negative	TGL49_0059_Cf_U_PE_324_WG	161	3.59	3.55573
LFS_cancer_negative	TGL49_0059_Cf_U_PE_324_WG	168.15	6.93	25.6272
LFS_cancer_negative	TGL49_0059_Cf_U_PE_324_WG	177.89	8	29.1442
LFS_cancer_negative	TGL49_0059_Cf_U_PE_324_WG	189.2	8	14.8643
LFS_cancer_negative	TGL49_0059_Cf_U_PE_324_WG	200.3	8	6.84994
LFS_cancer_negative	TGL49_0059_Cf_U_PE_324_WG	210.31	8	2.56243
LFS_cancer_negative	TGL49_0059_Cf_U_PE_324_WG	221	8	1.36532
LFS_cancer_negative	TGL49_0060_Cf_U_PE_319_WG	62	3.36	0.158797
LFS_cancer_negative	TGL49_0060_Cf_U_PE_319_WG	71.06	3.36	0.351844
LFS_cancer_negative	TGL49_0060_Cf_U_PE_319_WG	81.14	2.65	0.640745
LFS_cancer_negative	TGL49_0060_Cf_U_PE_319_WG	91.96	2.65	0.853434
LFS_cancer_negative	TGL49_0060_Cf_U_PE_319_WG	102.14	3.44	0.957202
LFS_cancer_negative	TGL49_0060_Cf_U_PE_319_WG	112.15	3.44	1.24405
LFS_cancer_negative	TGL49_0060_Cf_U_PE_319_WG	122.78	2.3	1.4144
LFS_cancer_negative	TGL49_0060_Cf_U_PE_319_WG	134.04	2.3	1.64796
LFS_cancer_negative	TGL49_0060_Cf_U_PE_319_WG	143.53	4.97	7.43197
LFS_cancer_negative	TGL49_0060_Cf_U_PE_319_WG	152.75	4.97	7.45309
LFS_cancer_negative	TGL49_0060_Cf_U_PE_319_WG	159.99	2.91	2.45076
LFS_cancer_negative	TGL49_0060_Cf_U_PE_319_WG	167.45	6.47	37.4769
LFS_cancer_negative	TGL49_0060_Cf_U_PE_319_WG	177.04	7.4	28.5654
LFS_cancer_negative	TGL49_0060_Cf_U_PE_319_WG	188.61	7.4	9.43513
LFS_cancer_negative	TGL49_0060_Cf_U_PE_319_WG	200.14	7.4	3.32566
LFS_cancer_negative	TGL49_0060_Cf_U_PE_319_WG	210.73	7.4	1.197
LFS_cancer_negative	TGL49_0060_Cf_U_PE_319_WG	217.01	7.4	0.0600207
LFS_cancer_negative	TGL49_0061_Cf_U_PE_324_WG	61.95	7.57	1.47082e-12
LFS_cancer_negative	TGL49_0061_Cf_U_PE_324_WG	68.67	7.57	1.60005e-12
LFS_cancer_negative	TGL49_0061_Cf_U_PE_324_WG	80.13	6.79	1.37985e-07
LFS_cancer_negative	TGL49_0061_Cf_U_PE_324_WG	92.29	6.79	3.41438e-12
LFS_cancer_negative	TGL49_0061_Cf_U_PE_324_WG	103.82	8	3.74589e-13
LFS_cancer_negative	TGL49_0061_Cf_U_PE_324_WG	109.15	8	1.77636e-14
LFS_cancer_negative	TGL49_0061_Cf_U_PE_324_WG	122.82	2.02	0.30878
LFS_cancer_negative	TGL49_0061_Cf_U_PE_324_WG	134.28	2.02	0.88362
LFS_cancer_negative	TGL49_0061_Cf_U_PE_324_WG	143.78	4.93	6.50513
LFS_cancer_negative	TGL49_0061_Cf_U_PE_324_WG	152.54	4.93	7.47242
LFS_cancer_negative	TGL49_0061_Cf_U_PE_324_WG	161	5.21	8.6971
LFS_cancer_negative	TGL49_0061_Cf_U_PE_324_WG	167.84	5.95	36.6611
LFS_cancer_negative	TGL49_0061_Cf_U_PE_324_WG	176.76	7.34	31.8493
LFS_cancer_negative	TGL49_0061_Cf_U_PE_324_WG	188.14	7.34	9.14617
LFS_cancer_negative	TGL49_0061_Cf_U_PE_324_WG	199.18	7.34	2.55923
LFS_cancer_negative	TGL49_0061_Cf_U_PE_324_WG	207	7.34	1.12501
LFS_cancer_negative	TGL49_0061_Cf_U_PE_324_WG	217	7.34	0.281197
LFS_cancer_negative	TGL49_0063_Cf_U_PE_328_WG	60.38	2	2.77862e-07
LFS_cancer_negative	TGL49_0063_Cf_U_PE_328_WG	70.11	2	4.90274e-12
LFS_cancer_negative	TGL49_0063_Cf_U_PE_328_WG	81.79	2	2.18048e-12
LFS_cancer_negative	TGL49_0063_Cf_U_PE_328_WG	92.43	2	0.10288
LFS_cancer_negative	TGL49_0063_Cf_U_PE_328_WG	102.53	2.02	0.172619
LFS_cancer_negative	TGL49_0063_Cf_U_PE_328_WG	111.7	2.02	0.215527
LFS_cancer_negative	TGL49_0063_Cf_U_PE_328_WG	122.79	2.02	0.504071
LFS_cancer_negative	TGL49_0063_Cf_U_PE_328_WG	134.33	2.02	1.04482
LFS_cancer_negative	TGL49_0063_Cf_U_PE_328_WG	143.77	4.46	6.67052
LFS_cancer_negative	TGL49_0063_Cf_U_PE_328_WG	152.76	4.46	7.41089
LFS_cancer_negative	TGL49_0063_Cf_U_PE_328_WG	160.18	3.39	3.96939
LFS_cancer_negative	TGL49_0063_Cf_U_PE_328_WG	167.57	6.37	41.584
LFS_cancer_negative	TGL49_0063_Cf_U_PE_328_WG	177.2	7.24	28.8648
LFS_cancer_negative	TGL49_0063_Cf_U_PE_328_WG	188.75	7.24	9.94804
LFS_cancer_negative	TGL49_0063_Cf_U_PE_328_WG	200.4	7.24	3.52595
LFS_cancer_negative	TGL49_0063_Cf_U_PE_328_WG	210.61	7.24	1.14557
LFS_cancer_negative	TGL49_0063_Cf_U_PE_328_WG	217.6	7.24	4.61009e-12
LFS_cancer_negative	TGL49_0065_Cf_U_PE_317_WG	60.7	2.05	7.49291e-07
LFS_cancer_negative	TGL49_0065_Cf_U_PE_317_WG	71.69	2.05	0.0386363
LFS_cancer_negative	TGL49_0065_Cf_U_PE_317_WG	81.28	2	0.24124
LFS_cancer_negative	TGL49_0065_Cf_U_PE_317_WG	92.12	2	0.35124
LFS_cancer_negative	TGL49_0065_Cf_U_PE_317_WG	102.2	2.97	0.502072
LFS_cancer_negative	TGL49_0065_Cf_U_PE_317_WG	111.91	2.97	0.573282
LFS_cancer_negative	TGL49_0065_Cf_U_PE_317_WG	122.71	2	0.73668
LFS_cancer_negative	TGL49_0065_Cf_U_PE_317_WG	134.18	2	1.19823
LFS_cancer_negative	TGL49_0065_Cf_U_PE_317_WG	143.66	5.01	7.88915
LFS_cancer_negative	TGL49_0065_Cf_U_PE_317_WG	152.74	5.01	7.90553
LFS_cancer_negative	TGL49_0065_Cf_U_PE_317_WG	160.05	3.25	3.32898
LFS_cancer_negative	TGL49_0065_Cf_U_PE_317_WG	167.49	6.45	40.2869
LFS_cancer_negative	TGL49_0065_Cf_U_PE_317_WG	176.9	7.6	29.4673
LFS_cancer_negative	TGL49_0065_Cf_U_PE_317_WG	188.73	7.6	8.69062
LFS_cancer_negative	TGL49_0065_Cf_U_PE_317_WG	200.43	7.6	2.90438
LFS_cancer_negative	TGL49_0065_Cf_U_PE_317_WG	210.13	7.6	0.819464
LFS_cancer_negative	TGL49_0065_Cf_U_PE_317_WG	217.21	7.6	4.46352e-07
LFS_cancer_negative	TGL49_0065_Cf_n_PE_398_WG	58.67	2	1.1581e-08
LFS_cancer_negative	TGL49_0065_Cf_n_PE_398_WG	72	2	0.019658
LFS_cancer_negative	TGL49_0065_Cf_n_PE_398_WG	81.24	2.3	0.313419
LFS_cancer_negative	TGL49_0065_Cf_n_PE_398_WG	92.13	2.3	0.465259
LFS_cancer_negative	TGL49_0065_Cf_n_PE_398_WG	102.2	3.2	0.638211
LFS_cancer_negative	TGL49_0065_Cf_n_PE_398_WG	111.94	3.2	0.739567
LFS_cancer_negative	TGL49_0065_Cf_n_PE_398_WG	122.7	2	0.875992
LFS_cancer_negative	TGL49_0065_Cf_n_PE_398_WG	134.14	2	1.31618
LFS_cancer_negative	TGL49_0065_Cf_n_PE_398_WG	143.57	5.08	8.67946
LFS_cancer_negative	TGL49_0065_Cf_n_PE_398_WG	152.63	5.08	8.78997
LFS_cancer_negative	TGL49_0065_Cf_n_PE_398_WG	159.78	3.05	3.19409
LFS_cancer_negative	TGL49_0065_Cf_n_PE_398_WG	167.39	6.48	43.991
LFS_cancer_negative	TGL49_0065_Cf_n_PE_398_WG	176.82	7.09	26.2813
LFS_cancer_negative	TGL49_0065_Cf_n_PE_398_WG	188.24	7.09	6.83119
LFS_cancer_negative	TGL49_0065_Cf_n_PE_398_WG	200.2	7.09	2.00202
LFS_cancer_negative	TGL49_0065_Cf_n_PE_398_WG	209.8	7.09	0.5089
LFS_cancer_negative	TGL49_0065_Cf_n_PE_398_WG	217.49	7.09	4.15845e-12
LFS_cancer_negative	TGL49_0066_Cf_U_PE_324_WG	61.16	2	2.13931e-07
LFS_cancer_negative	TGL49_0066_Cf_U_PE_324_WG	70.36	2	4.62519e-13
LFS_cancer_negative	TGL49_0066_Cf_U_PE_324_WG	81.33	2.01	0.246359
LFS_cancer_negative	TGL49_0066_Cf_U_PE_324_WG	92.18	2.01	0.391704
LFS_cancer_negative	TGL49_0066_Cf_U_PE_324_WG	102.41	4.2	0.898705
LFS_cancer_negative	TGL49_0066_Cf_U_PE_324_WG	112.18	4.2	1.29016
LFS_cancer_negative	TGL49_0066_Cf_U_PE_324_WG	122.72	2.3	1.12751
LFS_cancer_negative	TGL49_0066_Cf_U_PE_324_WG	133.98	2.3	1.42712
LFS_cancer_negative	TGL49_0066_Cf_U_PE_324_WG	143.37	5.42	8.03841
LFS_cancer_negative	TGL49_0066_Cf_U_PE_324_WG	152.45	5.42	8.91618
LFS_cancer_negative	TGL49_0066_Cf_U_PE_324_WG	159.83	2.95	2.77074
LFS_cancer_negative	TGL49_0066_Cf_U_PE_324_WG	167.41	6.34	41.0369
LFS_cancer_negative	TGL49_0066_Cf_U_PE_324_WG	176.88	6.93	27.2185
LFS_cancer_negative	TGL49_0066_Cf_U_PE_324_WG	188.29	6.93	8.23456
LFS_cancer_negative	TGL49_0066_Cf_U_PE_324_WG	199.84	6.93	2.56018
LFS_cancer_negative	TGL49_0066_Cf_U_PE_324_WG	208.7	6.93	0.659806
LFS_cancer_negative	TGL49_0066_Cf_U_PE_324_WG	217	6.93	1.25522e-12
LFS_cancer_negative	TGL49_0068_Cf_U_PE_323_WG	61.71	2.77	2.73115e-14
LFS_cancer_negative	TGL49_0068_Cf_U_PE_323_WG	68	2.77	4.5608e-13
LFS_cancer_negative	TGL49_0068_Cf_U_PE_323_WG	80.8	2.07	7.21889e-12
LFS_cancer_negative	TGL49_0068_Cf_U_PE_323_WG	92.39	2.07	2.63456e-12
LFS_cancer_negative	TGL49_0068_Cf_U_PE_323_WG	103.76	2.08	0.00306597
LFS_cancer_negative	TGL49_0068_Cf_U_PE_323_WG	111.52	2.08	0.0591578
LFS_cancer_negative	TGL49_0068_Cf_U_PE_323_WG	122.81	2	0.247329
LFS_cancer_negative	TGL49_0068_Cf_U_PE_323_WG	134.4	2	0.746381
LFS_cancer_negative	TGL49_0068_Cf_U_PE_323_WG	144	4.83	6.06072
LFS_cancer_negative	TGL49_0068_Cf_U_PE_323_WG	152.68	4.83	7.78951
LFS_cancer_negative	TGL49_0068_Cf_U_PE_323_WG	159.91	3.28	3.4486
LFS_cancer_negative	TGL49_0068_Cf_U_PE_323_WG	167.34	6.13	36.8675
LFS_cancer_negative	TGL49_0068_Cf_U_PE_323_WG	176.66	8	34.618
LFS_cancer_negative	TGL49_0068_Cf_U_PE_323_WG	188.88	8	9.97813
LFS_cancer_negative	TGL49_0068_Cf_U_PE_323_WG	200.57	8	3.7629
LFS_cancer_negative	TGL49_0068_Cf_U_PE_323_WG	210.88	8	1.45037
LFS_cancer_negative	TGL49_0068_Cf_U_PE_323_WG	220.98	8	0.421628
LFS_cancer_negative	TGL49_0087_Cf_U_PE_321_WG	61.5	2.58	7.99361e-15
LFS_cancer_negative	TGL49_0087_Cf_U_PE_321_WG	70.77	2.58	1.94289e-13
LFS_cancer_negative	TGL49_0087_Cf_U_PE_321_WG	81.33	2	0.0819348
LFS_cancer_negative	TGL49_0087_Cf_U_PE_321_WG	92.33	2	0.200001
LFS_cancer_negative	TGL49_0087_Cf_U_PE_321_WG	102.46	2.61	0.327891
LFS_cancer_negative	TGL49_0087_Cf_U_PE_321_WG	112.02	2.61	0.47313
LFS_cancer_negative	TGL49_0087_Cf_U_PE_321_WG	122.81	2	0.737104
LFS_cancer_negative	TGL49_0087_Cf_U_PE_321_WG	134.25	2	1.06494
LFS_cancer_negative	TGL49_0087_Cf_U_PE_321_WG	143.71	4.68	6.20866
LFS_cancer_negative	TGL49_0087_Cf_U_PE_321_WG	152.78	4.68	6.34051
LFS_cancer_negative	TGL49_0087_Cf_U_PE_321_WG	160.25	3	2.36479
LFS_cancer_negative	TGL49_0087_Cf_U_PE_321_WG	167.79	6.73	39.8884
LFS_cancer_negative	TGL49_0087_Cf_U_PE_321_WG	177.55	7.43	31.0061
LFS_cancer_negative	TGL49_0087_Cf_U_PE_321_WG	188.96	7.43	11.2055
LFS_cancer_negative	TGL49_0087_Cf_U_PE_321_WG	200.25	7.43	3.81795
LFS_cancer_negative	TGL49_0087_Cf_U_PE_321_WG	210.73	7.43	1.34114
LFS_cancer_negative	TGL49_0087_Cf_U_PE_321_WG	217.24	7.43	0.108411
LFS_cancer_negative	TGL49_0092_Cf_U_PE_328_WG	60.82	2	5.16076e-12
LFS_cancer_negative	TGL49_0092_Cf_U_PE_328_WG	70.68	2	0.0539972
LFS_cancer_negative	TGL49_0092_Cf_U_PE_328_WG	81.23	2.18	0.229897
LFS_cancer_negative	TGL49_0092_Cf_U_PE_328_WG	92.14	2.18	0.331655
LFS_cancer_negative	TGL49_0092_Cf_U_PE_328_WG	102.25	3.11	0.456549
LFS_cancer_negative	TGL49_0092_Cf_U_PE_328_WG	112.24	3.11	0.659764
LFS_cancer_negative	TGL49_0092_Cf_U_PE_328_WG	122.79	2.12	0.862298
LFS_cancer_negative	TGL49_0092_Cf_U_PE_328_WG	134.07	2.12	1.05241
LFS_cancer_negative	TGL49_0092_Cf_U_PE_328_WG	143.9	4.95	5.87314
LFS_cancer_negative	TGL49_0092_Cf_U_PE_328_WG	152.8	4.95	6.23961
LFS_cancer_negative	TGL49_0092_Cf_U_PE_328_WG	160.33	2.92	2.18967
LFS_cancer_negative	TGL49_0092_Cf_U_PE_328_WG	167.67	6.7	33.2319
LFS_cancer_negative	TGL49_0092_Cf_U_PE_328_WG	177.21	7.57	31.8995
LFS_cancer_negative	TGL49_0092_Cf_U_PE_328_WG	188.61	7.57	13.4682
LFS_cancer_negative	TGL49_0092_Cf_U_PE_328_WG	200.02	7.57	5.70876
LFS_cancer_negative	TGL49_0092_Cf_U_PE_328_WG	210.79	7.57	2.1189
LFS_cancer_negative	TGL49_0092_Cf_U_PE_328_WG	221	7.57	0.591057
LFS_cancer_negative	TGL49_0097_Cf_U_PE_325_WG	60.95	7.03	1.60227e-12
LFS_cancer_negative	TGL49_0097_Cf_U_PE_325_WG	71.4	7.03	5.35882e-12
LFS_cancer_negative	TGL49_0097_Cf_U_PE_325_WG	81.46	2	0.19104
LFS_cancer_negative	TGL49_0097_Cf_U_PE_325_WG	92.26	2	0.282168
LFS_cancer_negative	TGL49_0097_Cf_U_PE_325_WG	102.42	2.87	0.417822
LFS_cancer_negative	TGL49_0097_Cf_U_PE_325_WG	112.03	2.87	0.513054
LFS_cancer_negative	TGL49_0097_Cf_U_PE_325_WG	122.83	2	0.685174
LFS_cancer_negative	TGL49_0097_Cf_U_PE_325_WG	134.33	2	1.04738
LFS_cancer_negative	TGL49_0097_Cf_U_PE_325_WG	143.89	4.79	6.65017
LFS_cancer_negative	TGL49_0097_Cf_U_PE_325_WG	152.88	4.79	7.0915
LFS_cancer_negative	TGL49_0097_Cf_U_PE_325_WG	160.11	3.16	2.77696
LFS_cancer_negative	TGL49_0097_Cf_U_PE_325_WG	167.68	6.61	43.9877
LFS_cancer_negative	TGL49_0097_Cf_U_PE_325_WG	177.16	7.17	28.7349
LFS_cancer_negative	TGL49_0097_Cf_U_PE_325_WG	188.54	7.17	8.92471
LFS_cancer_negative	TGL49_0097_Cf_U_PE_325_WG	200.28	7.17	2.84444
LFS_cancer_negative	TGL49_0097_Cf_U_PE_325_WG	209.97	7.17	0.822423
LFS_cancer_negative	TGL49_0097_Cf_U_PE_325_WG	217	7.17	2.67542e-07
LFS_cancer_negative	TGL49_0098_Cf_U_PE_324_WG	61.73	2	0.0210806
LFS_cancer_negative	TGL49_0098_Cf_U_PE_324_WG	70.48	2	0.0689925
LFS_cancer_negative	TGL49_0098_Cf_U_PE_324_WG	81.19	2.25	0.300945
LFS_cancer_negative	TGL49_0098_Cf_U_PE_324_WG	92.14	2.25	0.388649
LFS_cancer_negative	TGL49_0098_Cf_U_PE_324_WG	102.32	3.52	0.617111
LFS_cancer_negative	TGL49_0098_Cf_U_PE_324_WG	112.11	3.52	0.822011
LFS_cancer_negative	TGL49_0098_Cf_U_PE_324_WG	122.71	2	0.790506
LFS_cancer_negative	TGL49_0098_Cf_U_PE_324_WG	134.08	2	1.03889
LFS_cancer_negative	TGL49_0098_Cf_U_PE_324_WG	143.67	5.17	7.58946
LFS_cancer_negative	TGL49_0098_Cf_U_PE_324_WG	152.64	5.17	8.21595
LFS_cancer_negative	TGL49_0098_Cf_U_PE_324_WG	159.8	2.82	2.55519
LFS_cancer_negative	TGL49_0098_Cf_U_PE_324_WG	167.43	6.39	43.8463
LFS_cancer_negative	TGL49_0098_Cf_U_PE_324_WG	176.88	7.05	27.6109
LFS_cancer_negative	TGL49_0098_Cf_U_PE_324_WG	188.34	7.05	7.62095
LFS_cancer_negative	TGL49_0098_Cf_U_PE_324_WG	200.04	7.05	2.42985
LFS_cancer_negative	TGL49_0098_Cf_U_PE_324_WG	209.88	7.05	0.761818
LFS_cancer_negative	TGL49_0098_Cf_U_PE_324_WG	217.06	7.05	9.57234e-13
LFS_cancer_negative	TGL49_0102_Cf_U_PE_325_WG	60.46	2.05	1.30007e-12
LFS_cancer_negative	TGL49_0102_Cf_U_PE_325_WG	70.26	2.05	6.2287e-07
LFS_cancer_negative	TGL49_0102_Cf_U_PE_325_WG	81.14	2.01	0.116819
LFS_cancer_negative	TGL49_0102_Cf_U_PE_325_WG	92.15	2.01	0.22842
LFS_cancer_negative	TGL49_0102_Cf_U_PE_325_WG	102.28	2.96	0.365356
LFS_cancer_negative	TGL49_0102_Cf_U_PE_325_WG	111.61	2.96	0.412211
LFS_cancer_negative	TGL49_0102_Cf_U_PE_325_WG	122.69	2	0.51884
LFS_cancer_negative	TGL49_0102_Cf_U_PE_325_WG	134.24	2	0.862086
LFS_cancer_negative	TGL49_0102_Cf_U_PE_325_WG	143.5	4.78	6.62556
LFS_cancer_negative	TGL49_0102_Cf_U_PE_325_WG	152.21	4.78	7.36664
LFS_cancer_negative	TGL49_0102_Cf_U_PE_325_WG	159.64	3.05	2.66935
LFS_cancer_negative	TGL49_0102_Cf_U_PE_325_WG	167.74	6.97	54.885
LFS_cancer_negative	TGL49_0102_Cf_U_PE_325_WG	177.52	6	21.2926
LFS_cancer_negative	TGL49_0102_Cf_U_PE_325_WG	187.88	6	6.89894
LFS_cancer_negative	TGL49_0102_Cf_U_PE_325_WG	198.58	6	2.01532
LFS_cancer_negative	TGL49_0102_Cf_U_PE_325_WG	207.74	6	0.544322
LFS_cancer_negative	TGL49_0102_Cf_U_PE_325_WG	217	6	5.38902e-13
LFS_cancer_negative	TGL49_0103_Cf_U_PE_324_WG	60.24	2.22	3.45825e-08
LFS_cancer_negative	TGL49_0103_Cf_U_PE_324_WG	70.09	2.22	4.21032e-06
LFS_cancer_negative	TGL49_0103_Cf_U_PE_324_WG	81.08	2	0.0259617
LFS_cancer_negative	TGL49_0103_Cf_U_PE_324_WG	92.76	2	0.112101
LFS_cancer_negative	TGL49_0103_Cf_U_PE_324_WG	102.45	2.03	0.182372
LFS_cancer_negative	TGL49_0103_Cf_U_PE_324_WG	111.56	2.03	0.193304
LFS_cancer_negative	TGL49_0103_Cf_U_PE_324_WG	122.6	2.01	0.336266
LFS_cancer_negative	TGL49_0103_Cf_U_PE_324_WG	134.37	2.01	0.74333
LFS_cancer_negative	TGL49_0103_Cf_U_PE_324_WG	143.58	4.52	6.37554
LFS_cancer_negative	TGL49_0103_Cf_U_PE_324_WG	152.15	4.52	7.09372
LFS_cancer_negative	TGL49_0103_Cf_U_PE_324_WG	159.4	3.4	3.49328
LFS_cancer_negative	TGL49_0103_Cf_U_PE_324_WG	167.53	6.59	52.723
LFS_cancer_negative	TGL49_0103_Cf_U_PE_324_WG	176.98	7.01	27.6922
LFS_cancer_negative	TGL49_0103_Cf_U_PE_324_WG	188.02	7.01	5.61941
LFS_cancer_negative	TGL49_0103_Cf_U_PE_324_WG	199.11	7.01	0.731879
LFS_cancer_negative	TGL49_0103_Cf_U_PE_324_WG	208.7	7.01	1.31006e-14
LFS_cancer_negative	TGL49_0103_Cf_U_PE_324_WG	220.31	7.01	5.19806e-13
LFS_cancer_negative	TGL49_0103_Pb_n_PE_313_WG	61.02	2.17	0.0514198
LFS_cancer_negative	TGL49_0103_Pb_n_PE_313_WG	70.53	2.17	0.0977973
LFS_cancer_negative	TGL49_0103_Pb_n_PE_313_WG	81.09	2	0.321601
LFS_cancer_negative	TGL49_0103_Pb_n_PE_313_WG	91.87	2	0.44084
LFS_cancer_negative	TGL49_0103_Pb_n_PE_313_WG	101.97	3.25	0.727621
LFS_cancer_negative	TGL49_0103_Pb_n_PE_313_WG	111.64	3.25	0.807913
LFS_cancer_negative	TGL49_0103_Pb_n_PE_313_WG	122.46	2	0.891643
LFS_cancer_negative	TGL49_0103_Pb_n_PE_313_WG	133.9	2	1.36113
LFS_cancer_negative	TGL49_0103_Pb_n_PE_313_WG	143.14	4.51	7.8135
LFS_cancer_negative	TGL49_0103_Pb_n_PE_313_WG	151.8	4.51	7.03367
LFS_cancer_negative	TGL49_0103_Pb_n_PE_313_WG	161	6.72	15.6284
LFS_cancer_negative	TGL49_0103_Pb_n_PE_313_WG	167.53	5.26	31.9487
LFS_cancer_negative	TGL49_0103_Pb_n_PE_313_WG	176.36	7	28.7359
LFS_cancer_negative	TGL49_0103_Pb_n_PE_313_WG	188.01	7	6.69102
LFS_cancer_negative	TGL49_0103_Pb_n_PE_313_WG	199.73	7	1.7915
LFS_cancer_negative	TGL49_0103_Pb_n_PE_313_WG	207	7	0.257148
LFS_cancer_negative	TGL49_0103_Pb_n_PE_313_WG	217.22	7	7.28395e-12
LFS_cancer_negative	TGL49_0103_Pb_n_PE_402_WG	60.06	2.14	3.09426e-06
LFS_cancer_negative	TGL49_0103_Pb_n_PE_402_WG	69.96	2.14	4.96006e-08
LFS_cancer_negative	TGL49_0103_Pb_n_PE_402_WG	80.96	2.07	2.07167e-06
LFS_cancer_negative	TGL49_0103_Pb_n_PE_402_WG	92.12	2.07	8.217e-07
LFS_cancer_negative	TGL49_0103_Pb_n_PE_402_WG	102.11	2.1	2.26913e-10
LFS_cancer_negative	TGL49_0103_Pb_n_PE_402_WG	111.22	2.1	0.0371893
LFS_cancer_negative	TGL49_0103_Pb_n_PE_402_WG	122.42	2.01	0.17665
LFS_cancer_negative	TGL49_0103_Pb_n_PE_402_WG	134.2	2.01	0.506687
LFS_cancer_negative	TGL49_0103_Pb_n_PE_402_WG	143.56	5.3	8.03059
LFS_cancer_negative	TGL49_0103_Pb_n_PE_402_WG	152.51	5.3	9.53745
LFS_cancer_negative	TGL49_0103_Pb_n_PE_402_WG	159.79	3.04	3.0037
LFS_cancer_negative	TGL49_0103_Pb_n_PE_402_WG	167.62	6.78	59.9508
LFS_cancer_negative	TGL49_0103_Pb_n_PE_402_WG	177.2	5.52	17.5077
LFS_cancer_negative	TGL49_0103_Pb_n_PE_402_WG	187.26	5.52	4.79606
LFS_cancer_negative	TGL49_0103_Pb_n_PE_402_WG	198.03	5.52	1.40866
LFS_cancer_negative	TGL49_0103_Pb_n_PE_402_WG	207.08	5.52	0.47202
LFS_cancer_negative	TGL49_0103_Pb_n_PE_402_WG	217.95	5.52	2.24537e-10
LFS_cancer_negative	TGL49_0105_Cf_U_PE_324_WG	61.88	2	6.08535e-12
LFS_cancer_negative	TGL49_0105_Cf_U_PE_324_WG	70.63	2	6.60805e-13
LFS_cancer_negative	TGL49_0105_Cf_U_PE_324_WG	81.27	2	0.00248455
LFS_cancer_negative	TGL49_0105_Cf_U_PE_324_WG	92.36	2	0.09703
LFS_cancer_negative	TGL49_0105_Cf_U_PE_324_WG	102.33	2.01	0.160686
LFS_cancer_negative	TGL49_0105_Cf_U_PE_324_WG	111.19	2.01	0.148551
LFS_cancer_negative	TGL49_0105_Cf_U_PE_324_WG	122.52	2.03	0.216188
LFS_cancer_negative	TGL49_0105_Cf_U_PE_324_WG	134.32	2.03	0.462412
LFS_cancer_negative	TGL49_0105_Cf_U_PE_324_WG	143.73	4.23	4.47659
LFS_cancer_negative	TGL49_0105_Cf_U_PE_324_WG	152.57	4.23	6.00167
LFS_cancer_negative	TGL49_0105_Cf_U_PE_324_WG	160.13	3.34	3.77291
LFS_cancer_negative	TGL49_0105_Cf_U_PE_324_WG	167.81	6.29	42.0993
LFS_cancer_negative	TGL49_0105_Cf_U_PE_324_WG	177.37	6.82	32.0836
LFS_cancer_negative	TGL49_0105_Cf_U_PE_324_WG	188.47	6.82	11.4008
LFS_cancer_negative	TGL49_0105_Cf_U_PE_324_WG	199.72	6.82	3.35227
LFS_cancer_negative	TGL49_0105_Cf_U_PE_324_WG	208.88	6.82	0.883221
LFS_cancer_negative	TGL49_0105_Cf_U_PE_324_WG	219.67	6.82	2.42029e-14
LFS_cancer_negative	TGL49_0106_Cf_U_PE_325_WG	61.8	2	5.77316e-14
LFS_cancer_negative	TGL49_0106_Cf_U_PE_325_WG	69.07	2	5.87175e-12
LFS_cancer_negative	TGL49_0106_Cf_U_PE_325_WG	81.28	2	0.0234466
LFS_cancer_negative	TGL49_0106_Cf_U_PE_325_WG	92.23	2	0.124417
LFS_cancer_negative	TGL49_0106_Cf_U_PE_325_WG	102.33	2.57	0.236952
LFS_cancer_negative	TGL49_0106_Cf_U_PE_325_WG	111.17	2.57	0.257376
LFS_cancer_negative	TGL49_0106_Cf_U_PE_325_WG	122.5	2	0.309825
LFS_cancer_negative	TGL49_0106_Cf_U_PE_325_WG	134.26	2	0.513789
LFS_cancer_negative	TGL49_0106_Cf_U_PE_325_WG	143.47	4.44	4.77806
LFS_cancer_negative	TGL49_0106_Cf_U_PE_325_WG	152.32	4.44	6.35361
LFS_cancer_negative	TGL49_0106_Cf_U_PE_325_WG	160.1	3.78	4.93534
LFS_cancer_negative	TGL49_0106_Cf_U_PE_325_WG	167.66	5.86	39.167
LFS_cancer_negative	TGL49_0106_Cf_U_PE_325_WG	177.07	6.98	33.2804
LFS_cancer_negative	TGL49_0106_Cf_U_PE_325_WG	188.46	6.98	10.9895
LFS_cancer_negative	TGL49_0106_Cf_U_PE_325_WG	200.06	6.98	3.20311
LFS_cancer_negative	TGL49_0106_Cf_U_PE_325_WG	209.21	6.98	0.800078
LFS_cancer_negative	TGL49_0106_Cf_U_PE_325_WG	219.17	6.98	2.66187e-12
LFS_cancer_negative	TGL49_0107_Cf_U_PE_324_WG	61.8	4.41	0.154903
LFS_cancer_negative	TGL49_0107_Cf_U_PE_324_WG	72	4.41	0.243359
LFS_cancer_negative	TGL49_0107_Cf_U_PE_324_WG	81.23	2.43	0.428406
LFS_cancer_negative	TGL49_0107_Cf_U_PE_324_WG	92.07	2.43	0.551965
LFS_cancer_negative	TGL49_0107_Cf_U_PE_324_WG	102.23	3.67	0.774689
LFS_cancer_negative	TGL49_0107_Cf_U_PE_324_WG	112.23	3.67	1.02064
LFS_cancer_negative	TGL49_0107_Cf_U_PE_324_WG	122.81	2.08	1.11945
LFS_cancer_negative	TGL49_0107_Cf_U_PE_324_WG	134.04	2.08	1.28281
LFS_cancer_negative	TGL49_0107_Cf_U_PE_324_WG	143.76	4.95	7.60572
LFS_cancer_negative	TGL49_0107_Cf_U_PE_324_WG	152.75	4.95	7.6902
LFS_cancer_negative	TGL49_0107_Cf_U_PE_324_WG	160.05	2.85	2.2447
LFS_cancer_negative	TGL49_0107_Cf_U_PE_324_WG	167.66	6.78	42.7141
LFS_cancer_negative	TGL49_0107_Cf_U_PE_324_WG	177.12	6.91	27.8075
LFS_cancer_negative	TGL49_0107_Cf_U_PE_324_WG	188.07	6.91	8.34612
LFS_cancer_negative	TGL49_0107_Cf_U_PE_324_WG	199.46	6.91	2.22467
LFS_cancer_negative	TGL49_0107_Cf_U_PE_324_WG	208.48	6.91	0.542584
LFS_cancer_negative	TGL49_0107_Cf_U_PE_324_WG	217.09	6.91	3.81495e-12
LFS_cancer_negative	TGL49_0109_Cf_U_PE_320_WG	61.64	2.03	0.035193
LFS_cancer_negative	TGL49_0109_Cf_U_PE_320_WG	70.79	2.03	0.0782804
LFS_cancer_negative	TGL49_0109_Cf_U_PE_320_WG	81.29	2.26	0.318626
LFS_cancer_negative	TGL49_0109_Cf_U_PE_320_WG	92.11	2.26	0.400631
LFS_cancer_negative	TGL49_0109_Cf_U_PE_320_WG	102.39	3.4	0.611361
LFS_cancer_negative	TGL49_0109_Cf_U_PE_320_WG	111.97	3.4	0.733591
LFS_cancer_negative	TGL49_0109_Cf_U_PE_320_WG	122.74	2	0.806918
LFS_cancer_negative	TGL49_0109_Cf_U_PE_320_WG	134.15	2	1.04157
LFS_cancer_negative	TGL49_0109_Cf_U_PE_320_WG	143.64	4.94	7.46497
[truncated: 1,453 more rows]

## Sheet: Supplementary Data 7
Supplementary Data 7. Size profiles and deconvolution results of cell-free DNA from patients pre- and post-radiotherapy*
Number of fragments																								Size deconvolution results
ID	SLX-21407.p1H09	SLX-21407.p1B05	SLX-21407.p1C10	SLX-21407.p1D10	SLX-21407.p1B06	SLX-21407.p1H05	SLX-21407.p1A05	SLX-21407.p1D05	SLX-21407.p1G08	SLX-21407.p1F08	SLX-21407.p1G05	SLX-21407.p1D08	SLX-21407.p1F12	SLX-21407.p1E12	SLX-21407.p1C06	SLX-21407.p1H04	SLX-21407.p1B08	SLX-21407.p1A08	SLX-21407.p1F07	SLX-21407.p1E07	SLX-21407.p1A07	SLX-21407.p1H06
Sample Size (bp)	A pre	A post	C pre	C post	D pre	D post	E pre	E post	F pre	F post	G pre	G post	H pre	H post	I pre	I post	K pre	K post	L pre	L Post	M pre	M Post			Center (bp)	Scale (bp)	Amplitude (%)		Center (bp)	Scale (bp)	Amplitude (%)
30	4	5	4	2	8	4	2	5	60	5	4	3	4	5	2	19	1	7	5	4	5	3		A pre	91.26	2.001	0.505603	A post	91.31	2	0.386787
31	5	3	3	2	3	7	2	5	50	1	1	2	3	4	0	17	0	3	7	2	2	8			101.48	2.993	0.858195		101.57	3.039	0.712606
32	2	1	1	2	4	5	5	6	44	8	8	6	2	3	3	9	3	5	3	3	2	3			111.27	2.993	1.23854		111.24	3.039	0.987283
33	6	5	2	0	1	2	3	3	50	4	2	1	1	4	3	14	2	3	2	3	1	5			121.95	2.001	1.57515		121.93	2.007	1.30145
34	2	3	1	3	4	2	4	2	45	6	3	5	8	7	1	2	2	2	4	3	2	6			133.18	2.001	2.13857		133.23	2.007	2.03918
35	4	2	5	4	4	4	2	1	50	8	4	2	1	3	3	10	3	4	2	3	3	2			142.18	4.697	9.98681		142.17	4.806	10.423
36	2	0	3	1	2	5	6	3	48	5	5	4	3	2	3	0	3	1	6	3	1	7			151.38	4.697	10.3468		151.26	4.806	10.6174
37	4	9	4	1	1	2	0	2	39	6	2	1	10	2	1	11	2	2	4	1	3	3			159.01	2.772	4.22869		158.98	3.176	5.34953
38	4	3	4	2	2	4	7	7	56	5	4	0	6	5	3	4	6	3	2	2	4	8			166.34	5.71	41.6025		166.28	5.444	42.0671
39	5	5	3	0	4	5	4	3	41	11	1	8	11	3	2	8	4	0	8	2	3	8			175.95	6.331	23.6931		175.62	6.27	23.5254
40	4	4	3	4	4	5	6	3	49	5	6	2	4	6	1	4	0	3	2	2	2	9			187.41	6.331	6.47312		187.28	6.27	5.42638
41	4	3	5	3	10	8	2	2	48	7	4	2	10	2	4	7	7	2	1	2	2	5			199.02	6.331	1.84821		198.95	6.27	1.54291
42	8	3	4	4	3	2	4	6	38	4	1	3	8	9	1	0	2	2	6	5	2	6			207.87	6.331	0.386346		208.29	6.27	0.353212
43	13	2	62	3	2	6	12	1	44	8	0	3	9	0	18	2	3	4	8	3	5	9		C pre	91.38	2.001	0.268179	C post	91.23	2	0.592669
44	116	88	71	101	46	71	87	32	798	241	27	63	302	128	31	26	28	38	80	37	40	50			101.48	2.829	0.548963		101.44	3.491	1.14122
45	139	109	100	116	67	73	87	43	903	308	27	70	369	140	22	28	32	51	103	57	58	84			110.88	2.829	0.691788		111.13	3.491	1.37883
46	192	141	102	144	62	95	121	44	1117	307	35	92	413	178	43	33	43	60	97	58	50	89			121.89	2.022	0.968682		121.91	2	1.40569
47	243	168	130	216	74	108	150	60	1326	420	33	103	521	213	47	36	45	65	102	89	66	98			133.22	2.022	1.70955		133.15	2	2.25017
48	309	186	171	196	130	128	187	86	1633	439	59	128	596	258	57	45	48	95	154	105	86	134			142.34	4.608	9.60743		142.2	4.806	11.6462
49	388	264	204	274	120	147	227	107	1929	615	77	188	709	365	75	54	68	129	204	113	109	156			151.54	4.608	10.5428		151.4	4.806	11.7011
50	447	316	189	329	138	181	247	162	2015	665	60	154	777	423	65	63	86	148	215	131	118	172			158.86	2.496	3.87817		158.97	2.815	4.77443
51	402	277	169	325	142	200	228	133	1999	669	51	182	725	391	75	50	77	115	221	140	117	188			166.29	6.021	51.26		166.23	5.768	47.1761
52	389	278	204	323	123	148	228	117	1886	687	54	177	693	390	70	64	72	113	204	129	118	139			176	5.85	19.6442		175.77	5.948	18.2927
53	414	292	235	317	117	157	224	114	1986	649	70	187	679	357	68	44	70	118	207	151	111	184			186.93	5.85	4.97881		187.14	5.948	3.95936
54	440	300	245	340	136	185	224	118	2062	720	84	211	686	413	80	60	76	129	229	191	161	206			198.3	5.85	1.06633		198.27	5.948	0.753794
55	482	342	258	420	143	164	261	126	2299	795	81	177	772	428	87	60	87	143	254	185	149	200			207.17	5.85	5.67059e-06		208.14	5.948	4.4688e-08
56	537	384	341	442	153	183	312	144	2550	937	74	236	807	494	103	81	99	184	278	223	177	249		D pre	89.66	6.928	5.43215e-06	D post	91.31	2	0.204625
57	654	454	390	516	204	227	326	152	2974	1066	96	289	926	535	121	77	141	192	368	215	208	286			101.52	2	0.130333		101.56	2.12	0.335904
58	774	580	531	677	210	273	412	216	3545	1338	109	366	1162	701	159	112	139	224	402	278	231	349			111.03	2	0.260588		111.18	2.12	0.589039
59	1011	667	584	887	285	396	523	270	4431	1592	136	454	1320	861	181	122	197	269	489	348	266	438			121.84	2.056	0.648156		121.84	2.012	1.02001
60	1127	792	580	1027	317	438	600	321	5099	1783	148	501	1535	910	193	175	201	338	520	392	318	456			133.32	2.056	1.25578		133.25	2.012	1.63183
61	1233	766	539	970	322	422	587	303	4646	1813	123	527	1503	1002	149	173	218	352	533	411	325	477			142.59	4.17	6.81424		142.45	3.936	6.50356
62	1075	710	553	905	310	346	535	304	4042	1578	152	480	1438	871	171	168	227	295	523	362	339	425			151.6	4.17	7.42313		151.25	3.936	5.79229
63	1001	713	540	852	295	384	533	262	3702	1558	149	430	1321	811	166	135	193	345	508	358	316	486			158.71	2.038	1.85618		160.73	6.934	15.8911
64	1070	687	599	981	342	374	519	267	3811	1637	156	463	1381	903	182	153	213	308	573	364	322	434			166.62	6.998	57.6025		167.15	5.309	28.1977
65	1126	762	642	991	294	360	534	306	3922	1714	167	435	1383	895	209	135	201	334	555	368	373	524			176.73	5.706	19.1647		176.3	6.815	28.881
66	1193	823	760	1060	343	418	583	316	4075	1813	189	481	1475	963	222	165	234	372	620	426	396	490			187.5	5.706	6.97312		187.82	6.815	10.2706
67	1412	925	862	1140	373	448	642	342	4419	1942	199	571	1613	1076	273	167	233	351	694	446	429	614			198.67	5.706	2.4717		199.4	6.815	3.98173
68	1608	1079	1104	1351	482	553	807	442	5329	2413	197	723	1900	1260	327	238	289	457	773	558	485	695			209.32	5.706	0.824853		211	6.815	1.7385
69	2222	1375	1307	1693	557	726	1043	596	6413	3045	263	907	2343	1629	399	265	345	663	996	681	581	869		E pre	91.31	2	0.440156	F post	91.34	2	0.284841
70	2515	1580	1183	1992	632	852	1160	707	6787	3273	320	1076	2564	1888	381	395	452	700	1057	764	664	972			101.55	2.822	0.74456		101.7	2.633	0.589486
71	2313	1499	1098	1816	568	730	1139	621	6012	3155	293	1006	2453	1691	360	327	413	689	966	756	618	883			111.2	2.822	1.18099		111.35	2.633	1.0887
72	2074	1413	1152	1769	550	644	1013	525	5187	2815	264	853	2262	1604	313	277	373	626	994	671	633	870			121.92	2	1.44916		121.99	2.011	1.6225
73	2079	1417	1092	1635	501	657	950	506	5199	2776	275	827	2172	1512	366	284	341	590	1013	684	629	905			133.15	2	1.99407		133.14	2.011	2.31816
74	2112	1464	1287	1737	544	680	921	497	5376	2874	326	837	2276	1573	375	309	422	642	1018	706	695	929			142.44	4.209	7.48943		142.4	4.618	9.04507
75	2310	1471	1359	1944	606	746	1029	581	5690	3012	322	927	2381	1662	432	289	399	706	1084	765	718	1015			151.88	4.209	8.13018		151.72	4.618	9.07599
76	2496	1653	1554	2097	649	824	1164	632	6085	3157	355	1088	2460	1791	469	361	502	746	1112	825	769	1072			159.56	2.212	2.53793		159.35	2.355	2.61089
77	2780	1765	1860	2223	682	867	1263	699	6763	3722	385	1191	2682	2032	614	388	548	859	1245	967	839	1224			166.54	6.309	40.6671		166.44	6.272	40.4934
78	3458	2297	2646	2849	898	1111	1552	940	8267	4366	419	1465	3311	2437	768	549	686	1090	1544	1207	1037	1472			176.41	6.952	26.727		176.18	6.869	26.1745
79	5068	2974	3541	3877	1236	1607	2262	1407	10928	6079	642	2088	4381	3380	1132	795	905	1533	2055	1567	1322	1983			188.08	6.952	8.88175		187.76	6.869	7.7975
80	6397	3778	3594	5031	1575	2144	3092	1803	13325	7394	831	2616	5651	4348	1098	1176	1271	2052	2530	2021	1695	2434			199.64	6.952	3.36634		199.47	6.869	2.83269
81	6554	3756	2748	4975	1637	2078	3054	1733	13236	7559	810	2702	5828	4369	912	1170	1312	2048	2659	1989	1794	2519			211	6.952	1.41984		211	6.869	1.03288
82	5058	3033	2154	3870	1309	1593	2349	1388	10317	5907	669	2026	4367	3555	656	894	1027	1611	2091	1683	1416	2075		F pre	91.03	2	0.300536	F post	91.17	2	0.729189
83	3763	2339	2002	2863	990	1175	1786	1042	8116	4606	524	1595	3574	2493	651	667	737	1225	1672	1318	1231	1659			101.43	2.543	0.42444		101.37	3.073	1.12961
84	3571	2216	2058	2692	932	1088	1584	947	7434	4245	517	1454	3172	2417	655	569	690	1083	1634	1191	1180	1519			111.26	2.543	0.690397		111.4	3.073	1.72576
85	3769	2265	2297	2907	1000	1166	1611	995	7678	4204	521	1524	3264	2455	714	632	773	1149	1627	1228	1194	1634			121.86	2.003	1.01032		121.96	2.191	2.21791
86	4037	2434	2500	3119	1051	1277	1738	1077	8365	4696	596	1645	3522	2625	771	682	846	1222	1724	1356	1323	1709			133.18	2.003	1.35448		133.15	2.191	2.70056
87	4225	2589	2903	3354	1240	1384	1866	1254	9078	5165	599	1788	3674	2866	916	747	887	1452	1906	1484	1353	1958			142.71	4.215	5.97446		142.61	4.517	9.35255
88	4958	3011	3771	3934	1362	1665	2268	1490	11023	6035	694	2198	4363	3401	1273	973	1127	1657	2154	1795	1568	2174			151.75	4.215	6.9665		151.8	4.517	8.81336
89	7055	3905	5348	5040	1763	2290	3155	2113	14635	8192	911	2980	5805	4492	1768	1348	1409	2260	2727	2233	1972	3051			159.81	3.203	4.55906		159.38	2.465	2.5612
90	9619	5365	6591	7163	2548	3252	4488	3084	19720	11251	1258	4067	8115	6356	2117	1918	2172	3330	3840	3074	2617	4052			166.84	5.532	32.1489		166.54	6.521	40.3843
91	11754	6572	6591	8589	3054	4083	5461	3797	22173	13040	1542	4898	9763	8001	2131	2466	2586	3955	4461	3894	3105	4729			176.13	6.994	34.2094		176.32	6.54	23.5921
92	11551	6544	5373	8504	3196	3957	5475	3844	21075	13095	1626	4787	9639	7977	1699	2598	2697	4114	4602	3985	3289	4961			187.74	6.994	11.7014		187.64	6.54	7.921
93	9178	5257	4233	6693	2417	3008	4333	2969	16534	10165	1313	3772	7489	6086	1387	1989	2058	3188	3629	3196	2764	3899			199.31	6.994	4.10388		198.93	6.54	2.84153
94	7166	4221	4046	5497	1923	2407	3271	2215	13400	7982	1062	2979	6036	4748	1362	1659	1715	2546	2881	2522	2191	3224			211	6.994	1.50204		210.31	6.54	0.992739
95	6473	3905	4265	5038	1791	2193	2959	2103	12184	7109	924	2800	5580	4473	1459	1467	1623	2387	2626	2398	2090	3008		G pre	91.67	2	1.07107e-08	G post	91.25	2	0.277949
96	6883	4033	4905	5344	1943	2239	2940	2138	12557	7098	1038	2836	5764	4446	1613	1673	1784	2529	2780	2356	2194	3065			101.47	2	0.0156816		101.35	2.389	0.462437
97	7544	4593	5834	5984	2142	2565	3390	2380	13636	7728	1187	3353	6239	5170	1880	1888	2000	2819	2959	2488	2368	3473			110.92	2	0.0837631		111.02	2.389	0.680727
98	8669	5340	6898	6963	2627	2944	3976	2944	16286	9298	1498	3914	7363	6038	2355	2428	2434	3563	3616	2988	2795	3939			121.79	2.078	0.356189		121.88	2.015	1.04571
99	11060	6357	8036	8248	3275	3864	5013	3738	20478	11586	1806	4807	9132	7445	2755	3024	3014	4352	4249	3793	3561	5013			133.34	2.078	0.923652		133.17	2.015	1.58255
100	12899	7537	8555	9426	3784	4671	6139	4553	23963	14039	2147	5826	10747	8980	2939	3529	3552	5073	5196	4628	3963	5785			142.63	3.948	5.683		142.28	4.379	8.46912
101	14098	8077	8650	10141	4261	5110	6840	5269	26105	15411	2309	6300	11630	9505	2966	3797	3810	5569	5649	5036	4407	6369			151.67	3.948	6.78653		151.57	4.379	9.17293
102	14180	8358	8337	10349	4210	5258	6706	5364	26330	15051	2275	6161	11903	9756	2906	3873	3888	5700	5493	5011	4300	6595			159.25	2.837	4.0828		158.79	2.008	2.40706
103	13534	8038	7859	10011	4216	4892	6447	5051	24672	14183	2255	5788	11439	9500	2815	3866	3804	5456	5245	4843	4375	6390			166.73	5.931	43.5147		166.38	6.416	57.5928
104	12335	7301	7205	9088	3794	4379	5777	4518	22493	12999	2116	5226	10330	8426	2526	3611	3525	5014	5018	4516	3971	5899			176.57	6.318	27.9241		176.25	5.493	17.0482
105	11309	6948	7665	8531	3496	4096	5403	4248	20427	11620	2028	5015	9472	7857	2740	3320	3338	4632	4410	4066	3873	5543			187.79	6.318	10.8559		187.22	5.493	4.55357
106	11450	6919	8032	8676	3632	4121	5525	4260	20807	11566	2042	5087	9686	7882	2919	3614	3553	4839	4484	4088	3855	5667			199.11	6.318	3.74252		198.39	5.493	1.41634
107	12139	7490	8573	9210	4010	4465	5807	4563	22128	12403	2155	5491	10132	8444	3200	4053	3740	5202	4676	4428	4231	6198			209.55	6.318	1.23627		207.02	5.493	0.431992
108	13440	7985	9680	9829	4296	5036	6408	5230	25138	13797	2414	6031	11134	9080	3598	4353	4037	5683	5378	4872	4593	6856		H pre	91.22	2	0.589829	H post	91.3	2	0.532529
109	15004	8891	10941	10675	5066	5954	7621	6135	29269	16322	2824	6911	12626	10263	4116	4963	4555	6405	6122	5838	5268	7927			101.52	3.187	1.05307		101.55	3.065	0.959984
110	18320	10575	11777	12350	6074	7270	9025	7511	35535	19779	3278	8285	14792	12237	4656	5825	5441	7504	7556	7232	5946	9298			111.24	3.187	1.45334		111.19	3.065	1.31372
111	20626	11751	11691	13418	6973	8161	10256	8519	39479	22749	3744	9302	16727	13961	4368	6600	6112	8330	8492	8326	6749	10508			121.95	2	1.66923		121.95	2	1.58077
112	20380	11767	10229	13116	6682	8360	10015	8626	39174	22209	3714	9082	16243	13155	3922	6307	6023	7990	8408	8400	6556	10386			133.17	2	2.256		133.19	2	2.19161
113	17381	10080	9314	11588	6027	6817	8361	7304	34184	19348	3265	7704	13955	11423	3536	5448	5202	6956	7214	7277	5898	9163			142.43	4.596	10.4436		142.42	4.634	10.3201
114	15010	9106	9039	10340	5330	5910	7291	6342	29972	16552	2907	6767	12235	10053	3505	4912	4686	6094	6314	6040	5250	8222			151.76	4.596	10.6552		151.69	4.634	10.4817
115	14692	8929	9732	9937	5097	5888	6948	6068	28965	15681	2939	6462	11841	9803	3772	4849	4775	6143	6354	5922	5249	8111			159.13	2.461	3.02143		159.1	2.366	2.8683
116	15348	9479	10351	10235	5427	6159	7251	6344	30271	16399	2992	6952	12307	10088	4098	5137	5030	6618	6656	6297	5463	8487			166.24	6.147	45.0422		166.33	6.3	47.2652
117	16523	10058	10975	11117	5833	6566	7633	6766	32242	17350	3315	7620	12957	10884	4341	5687	5373	7154	6902	6548	5812	9092			176.05	6.651	20.9405		176.21	6.276	19.3939
118	17597	10828	12452	11836	6543	7041	8206	7495	35304	19014	3610	8023	13863	11805	4865	6058	5896	7566	7565	7158	6414	9945			187.9	6.651	5.58229		187.6	6.276	5.80199
119	19708	11960	14852	12978	7351	8153	9545	8522	40369	21534	4135	9006	15839	13105	6025	7029	6796	8514	8679	8438	7262	11187			199.68	6.651	1.76753		198.92	6.276	1.86998
120	24502	14526	18651	15428	9295	9881	11614	10584	48669	26491	5244	11043	18903	15580	7640	8670	8473	10724	10943	10783	8871	14107			210.01	6.651	0.50031		208.65	6.276	0.485079
121	30853	18463	21815	19419	11856	12879	14460	13031	59487	32472	6942	14305	24184	20076	8652	11200	10756	13953	14112	13910	11253	17712		I pre	91.99	6.842	0.0380407	I post	91.73	2.232	0.000187346
122	35349	21080	20869	22359	13546	14718	16209	15340	67151	36988	7753	16435	27509	23005	8283	12599	12767	16187	16299	16963	13354	20419			101.62	2.532	0.23563		101.68	2.001	0.134811
123	33790	20350	16707	21086	13299	13773	15665	14514	64483	35074	7538	15595	26328	21919	6447	12185	12102	15488	15438	15702	12837	19933			110.88	2.532	0.378205		110.86	2.001	0.299321
124	26575	16021	13705	16802	10457	10847	12466	11602	51457	28152	6064	12377	20581	17259	5260	9586	9587	12050	12134	12417	10325	16065			121.78	2	0.672734		121.79	2.059	0.646973
125	21224	12981	13102	13686	8168	8562	9638	9138	41041	22242	4851	9876	16176	13716	5024	7800	8110	9695	9448	9568	8302	12782			133.18	2	1.25191		133.19	2.059	1.27324
126	20040	12836	14163	13270	7740	7915	8941	8799	38581	20330	4632	9318	15338	12817	5579	7382	7830	9364	8839	8626	7757	12573			142.3	4.08	6.83598		142.39	4.275	7.60664
127	20992	13626	15799	14464	8273	8437	9413	9072	40442	21175	4818	9939	16165	13573	6056	8190	8388	10223	9334	8859	8175	13097			151.29	4.08	7.49997		151.56	4.275	8.94378
128	22886	14836	17557	15944	9120	9302	10331	9987	43463	22578	5411	10783	17284	14919	6773	8845	9687	11561	10209	9382	9064	14366			159.78	4.784	10.7096		158.92	2.43	3.26253
129	25181	16655	21118	17945	10487	10630	11598	11562	48885	25093	6206	12274	19696	16574	8514	10364	11090	13491	11258	10561	9980	16073			166.7	5.126	33.5587		166.36	6.187	50.2433
130	30203	19650	27108	21128	12830	12774	13884	13537	57885	29887	7726	15106	23189	19889	10921	12482	13979	16739	13537	12781	12234	19251			175.91	7	30.8452		176.28	6.063	22.8959
131	38403	24948	35116	26641	16441	16397	17151	16720	71827	36453	10037	18944	29465	24544	14109	16307	18055	21373	17175	16458	15650	24524			187.69	7	9.77116		187.24	6.063	7.54865
132	49233	32157	43230	34573	21710	21328	22101	21432	92027	45911	13436	24694	37701	32324	17187	21215	23818	28360	22650	21605	20463	32229			198.95	7	2.97337		198.04	6.063	2.33878
133	59771	39474	43924	41649	26773	26060	26973	25657	110598	54945	16602	29644	45606	38764	17275	26236	28551	34230	28216	26457	25446	39691			207.5	7	0.429629		207.01	6.063	0.215698
134	61386	40692	39532	42471	27729	26816	27261	26227	113639	56432	17298	30552	46916	39848	15565	26510	29779	35164	29292	27607	26622	40633		K pre	91.48	2.001	0.047095	K post	91.38	2.352	0.14762
135	54423	36705	36655	38010	24498	23126	23241	22831	98805	48684	15339	26926	40880	35220	14301	23333	26547	31217	25173	24025	23168	36381			101.61	2	0.188946		101.6	2.142	0.329299
136	48493	32913	38729	34737	22121	20214	20001	19933	86221	41950	13683	24686	36292	31167	15072	21310	24511	28288	21955	20239	20639	32103			110.92	2	0.302203		110.83	2.142	0.450421
137	50574	34694	45623	36443	23087	20604	20324	20259	88248	41817	14323	26008	37321	32188	17961	23071	26007	30014	22481	20347	21442	33720			121.84	2.047	0.741758		121.85	2.039	0.869212
138	58531	40542	55404	42668	27394	24068	23408	22861	101691	46928	17160	30777	43596	37896	22096	27637	30959	36304	26475	23687	25320	39175			133.21	2.047	1.7993		133.18	2.039	1.80089
139	70753	48491	65251	50913	33374	29755	28427	27603	124949	56417	21894	37760	52748	45333	27239	33996	37981	44142	32829	28920	31053	47630			142.36	4.508	10.8201		142.26	4.395	9.90937
140	84427	57580	73267	60254	40843	36349	35268	33111	152453	67970	26982	45536	62969	53958	30799	40994	45898	53715	40019	36016	38089	56964			151.5	4.508	10.739		151.33	4.395	10.1593
141	93755	63475	75915	67134	46723	41936	40441	37176	176942	77165	31022	51193	71353	60862	32011	46869	52161	60679	45657	41163	43527	64754			159.05	2.71	4.61717		159.1	3.095	5.87395
142	95432	64838	76188	68905	49078	44061	41272	38500	186574	81067	33040	52865	73980	63337	32184	48608	54041	62322	47275	43206	46335	67913			166.28	5.922	51.6038		166.38	5.713	46.0366
143	94172	64289	76708	68345	49447	43080	40775	37915	187022	80472	32963	52209	74079	62661	31666	48822	52717	61655	47251	42591	45802	67687			175.75	6.207	19.1486		175.92	6.407	22.3707
144	94060	63982	76785	67651	49548	43015	40816	37958	189388	80852	33297	52615	73626	62848	32159	48936	52951	60709	47422	42587	46151	68041			187.36	6.207	3.99433		187.44	6.407	5.60075
145	94282	64595	76287	68148	50035	43527	41023	38361	191818	80203	33530	53011	72876	63488	32155	49817	53096	60984	47112	42642	46491	68757			199.35	6.207	1.10801		199.53	6.407	1.44589
146	94534	65240	78442	67997	50498	43640	40209	37920	190284	78811	33519	52209	72951	62581	32752	49093	52874	61060	46667	41896	46233	68268			207.08	6.207	5.29994e-05		210.72	6.407	2.51049e-06
147	95973	65887	82114	68157	51554	43278	40146	37811	192631	77460	34049	53076	72388	62082	34674	50249	53516	62006	46547	41411	46701	69211		L pre	91.31	2	0.294641	L pre	91.45	2	0.288746
148	99921	69193	87501	71771	53571	45332	42159	38996	202012	80077	36160	56055	75334	64870	37714	53671	55238	64961	48591	42574	49651	71566			101.41	2.404	0.434093		101.55	2.466	0.476301
149	104815	72498	93214	75030	57183	48068	44630	41255	215760	84198	39047	60361	79518	68622	40646	57327	58034	68207	52366	45266	52870	75915			111.19	2.404	0.664899		111.34	2.466	0.863464
150	111552	75227	99052	79287	61934	51701	48102	43871	233718	89060	42173	65015	84302	72646	44271	61931	61985	73301	56686	48210	57063	81270			121.92	2.001	1.20762		122.05	2.004	1.59601
151	118022	80018	104766	83936	66979	56996	52957	46998	254118	95340	46935	69719	91351	77780	47425	67207	66426	78375	61011	53246	62086	87665			133.28	2.001	1.76984		133.28	2.004	2.10947
152	124179	84419	105466	87085	72421	60922	57547	50163	272809	101564	50400	74036	95855	82589	47563	71396	69630	81998	66138	57043	67128	93389			142.48	4.189	7.82457		142.58	4.274	8.8153
153	122813	83741	102861	86945	72751	61542	57826	50073	277227	101518	51130	74329	96290	82366	46355	71505	69954	81714	65958	57382	67588	93439			151.7	4.189	8.29159		151.8	4.274	8.90526
154	118390	81338	103524	84431	70618	59345	55183	47935	267491	97585	49438	72239	92630	79330	46461	69577	67671	79483	63863	54921	64999	90079			159.1	2.553	3.26107		159.55	3.555	6.31299
155	118954	81644	109479	84533	71562	59219	53504	47469	265218	96695	49992	72535	91771	78654	49858	70176	67765	79599	63691	54152	64820	90546			166.44	6.073	46.2575		166.47	5.143	31.7766
156	124836	87015	121008	89607	75780	61669	55653	49415	276670	98786	53017	77474	95103	81731	54182	74012	72384	84729	67062	56800	68206	94591			176.35	6.137	23.0946		175.77	7	30.6568
157	136824	95478	134135	98057	83625	68201	60139	53356	302528	106285	58851	85603	102217	87855	61274	81822	79275	93793	73402	61249	74262	103081			187.63	6.137	7.7685		187.69	7	9.13311
158	152533	104976	147328	107461	93279	75458	67200	59034	338878	116966	67012	95082	112419	97902	67566	91286	88010	104255	81794	67644	82795	113756			199.1	6.137	2.86601		199.55	7	2.90675
159	165910	115156	156790	118532	102876	83590	75531	65032	380773	128551	74657	105921	122769	106869	73006	101104	97395	114487	91379	74764	90922	124484			210.27	6.137	1.09011		210.51	7	0.975363
160	176913	122319	163154	125228	110238	90618	82631	71208	416807	138554	80136	112957	132571	114119	77216	108098	104483	123494	98331	80710	98670	134001		M pre	91.52	2	0.105159	M post	91.34	2.009	0.15468
161	185068	128906	172285	131261	115303	95441	86892	73490	444199	146307	86106	118398	138912	120444	80566	113683	109021	127880	104007	84418	104097	140124			101.58	2.004	0.216366		101.71	2.189	0.282779
162	193904	135839	188106	137286	121889	99684	91211	77998	466299	152255	89756	125814	144833	126251	87800	120401	115239	134442	108961	87858	108508	147354			110.97	2.004	0.344259		111.13	2.189	0.516282
163	210644	149000	211914	149568	134554	108492	97597	84181	505065	164537	98206	138500	158369	136793	98808	131610	125186	145533	119282	96546	117708	160260			121.94	2.022	0.771178		121.94	2.008	1.03351
164	238297	167894	232708	167136	151758	121336	109164	93677	562636	180962	110520	157926	176642	152115	107712	148635	140253	163344	135560	107267	132186	180521			133.33	2.022	1.39226		133.27	2.008	1.77992
165	262016	185492	239414	182826	167856	132948	118850	101871	621767	196980	122774	173624	192075	166000	111364	163435	152364	178012	148952	117841	145578	197516			142.57	4.101	6.99026		142.53	4.47	8.86459
166	269287	191322	233069	187024	174433	138683	123922	105433	654701	203659	128371	178802	195743	170442	110914	167300	156879	183394	154630	121654	150751	203408			151.7	4.101	7.85575		151.7	4.47	9.35523
167	266314	186431	223855	182283	173859	139696	124502	105466	666990	204831	129699	175771	193065	167522	109170	165901	153059	180632	152824	120669	150566	201775			158.97	2.144	2.07337		158.86	2.049	2.07357
168	257793	178930	212382	173879	169885	138041	122504	104194	672112	202476	128558	168712	185871	162477	105011	160178	147232	173970	147939	119286	146608	194613			166.47	6.815	50.7772		166.34	6.638	51.7159
169	245388	169289	197426	163710	162896	133969	119817	100835	663795	196807	124333	160207	177771	154767	99211	154001	139159	165318	142145	115353	140576	185980			176.8	6.251	21.8803		176.5	6.135	20.1682
170	231310	158639	183140	150572	154116	129101	114474	96710	644914	189510	119008	148210	166518	146006	93432	144647	128320	153854	133910	109150	133511	175200			187.96	6.251	8.54297		187.69	6.135	6.52911
171	215637	147508	170989	139159	143385	122820	109543	91775	618964	180854	111759	137378	155934	135906	88363	135258	117966	142273	125952	103055	125364	163508			199.38	6.251	3.2291		198.98	6.135	2.09987
172	202865	137805	163007	128325	136344	117051	103864	87230	596678	172030	106660	128597	145230	126626	85374	128021	108781	132536	118194	98466	119766	153623			210.18	6.251	1.10978		208.68	6.135	0.61797
173	196755	132053	157387	122544	132114	114445	100657	85543	589209	167892	104095	122228	139028	120778	84265	123129	102786	125884	115335	95662	116033	149017
174	192558	128935	152122	117684	129368	112905	99815	83834	588920	165840	102908	117967	134098	117109	82906	120797	98178	120945	112497	94641	114082	145665
175	188797	125789	145591	111834	126882	112406	99033	82993	593254	164681	102702	113813	129437	113898	81218	118732	93672	118096	111402	93774	112741	141607
176	182694	120128	135095	106372	122847	109747	96596	80966	587881	161368	101618	108336	124060	109870	77745	114484	88445	113085	108209	91986	110232	137573
177	172122	112136	124039	99236	115715	106271	92771	76887	567578	152976	97915	100266	117235	102557	71980	108530	81373	105348	102344	87392	105438	130134
178	158544	101892	111985	89838	108107	99797	87278	71575	534859	144279	92401	91761	108855	95336	67568	100639	74300	97072	95295	82341	98438	119957
179	144376	91822	100586	80571	98376	92883	81067	66403	495683	131429	85329	82180	99403	86518	61856	92283	66944	88328	87302	75863	91228	110065
180	130430	82242	89777	71933	89132	86068	74689	60799	457255	120740	78555	73611	89509	78506	56529	83539	60061	79675	79341	69759	83913	99811
181	117553	73856	80707	64080	81781	79484	68482	55522	421217	110546	71887	66018	81371	71231	51994	75750	53969	72024	72760	63701	76903	90654
182	107371	66952	73709	57164	74121	73889	63279	51315	390639	101637	65874	59588	73853	65022	48180	69506	47621	64694	66138	58601	71033	82980
183	98707	61082	68130	52061	68657	68425	58495	47306	365743	94768	61672	53903	67809	59868	45679	64580	43188	59033	60775	54435	65998	76615
184	91878	56980	63663	47801	63691	64569	55414	44158	345824	89125	58116	49522	62759	55628	43574	60002	39822	54907	56982	50676	61434	71461
185	86667	53110	60338	44786	60773	61895	52461	41622	330925	84545	56269	46521	59229	52326	41578	56858	37083	51540	54285	48382	58923	67048
186	82357	50366	56435	42109	57136	59292	50354	39929	319077	80541	53868	43495	56351	49680	40110	54277	34860	48855	52145	46750	56566	64548
187	78728	47437	52487	39092	54773	56842	47960	38159	308754	77294	52047	40983	53163	47084	38245	51475	33032	45928	49856	44284	54268	61107
188	73392	44801	48109	36846	51800	54590	45778	35960	293900	73277	49859	38533	50218	44395	35810	48522	30608	42920	47186	42761	51939	57823
189	68237	40905	43880	33913	48568	51620	43462	33831	276903	68795	47013	35827	47432	41853	33163	45163	28227	40512	44402	39920	48966	53854
190	63014	37924	39163	30805	44742	48249	40584	31528	256655	63713	43720	32596	43654	38448	30360	41273	26156	36520	40820	37025	45606	49928
191	57245	34416	35456	27599	40442	45053	37767	28983	235982	58691	40048	29656	40101	35319	27936	37885	23292	33227	37506	33990	42237	45296
192	51860	31005	32001	24735	37052	41156	34863	26257	217595	53800	36258	26922	36387	32199	25463	34676	20857	30090	34580	31233	38169	41500
193	47316	28126	29203	22430	34205	38234	31784	24520	198867	49170	33527	24578	33697	29613	24059	31617	19031	27319	31713	28529	35108	37603
194	43298	25877	27155	20804	31304	35374	29746	22525	185504	45921	30571	22540	31034	26939	22258	29157	17619	24860	29041	26230	32787	34840
195	40533	24303	25363	19103	29353	32969	27701	21146	174137	43300	28431	20971	28809	25300	20672	27127	16443	22936	27079	24526	30545	32663
196	37745	22873	23537	17381	27475	31425	26423	20037	165201	40462	27507	19715	26974	23747	19649	25143	15725	21473	25574	23148	28851	31044
197	36049	21545	22723	16736	26138	29685	24873	19299	156908	38860	26148	18643	25520	22617	18662	24171	14388	20845	24529	22154	27404	29157
198	34034	20657	21016	15818	24916	29179	23980	18177	150825	36668	24594	17682	24345	21498	17557	22373	14107	19518	23765	20943	26569	27623
199	32590	19344	19485	14683	23796	27456	23143	17380	143196	35129	23546	16986	23128	20461	16661	21088	13175	18142	22295	20237	25350	26080
200	30539	18326	17976	13807	22794	26356	21685	16580	135592	33081	22437	15925	22251	19215	15333	19751	12379	17196	21500	18995	23983	25087
201	28246	16998	16568	12729	20819	24919	20667	15366	126410	30699	20825	14909	20789	17817	13935	18142	11457	15933	19886	17592	22552	23138
202	26065	15582	14999	11624	19367	22992	19407	14397	116556	28662	19269	13842	19048	16730	12966	16497	10608	14786	18570	16582	21039	21525
203	24231	14406	13696	10686	18089	21175	17802	13315	107947	26386	17629	12808	17592	15426	11903	15105	9796	13383	17188	15395	19317	19645
204	21792	13314	12535	9671	16426	20219	16519	12516	99648	24245	16366	11785	16490	14199	10883	13865	8901	12183	15562	13932	17825	18274
205	20523	12406	11781	8991	15231	18401	15563	11446	92975	22856	15030	10910	15484	12909	10055	12888	8050	11192	14607	13214	16423	17036
206	18964	11507	10956	8445	14135	17268	14417	10691	87450	21483	14290	10089	14314	12096	9495	11991	7699	10550	13914	12175	15413	15846
207	18019	10935	10283	7791	13543	16518	13672	10320	82378	19838	13263	9631	13405	11438	8701	10975	7390	9981	12990	11445	14652	15009
208	16852	10241	9679	7237	12761	15926	12965	9580	78029	19173	12507	9128	12693	11043	8415	10237	6794	9309	12368	11095	13780	14041
209	16164	9763	8950	6803	12106	15072	12366	9450	74502	17975	11803	8663	12060	10462	7835	9483	6409	8899	11624	10548	13130	13256
210	14990	9206	8542	6455	11621	14243	11818	8777	70585	17462	11294	8271	11557	9844	7209	8925	6009	8208	11382	9854	12640	12712
211	13986	8772	7974	5886	10905	13504	11218	8167	66235	16176	10489	7753	10799	9127	6835	8221	5607	7913	10593	9390	11753	11971
212	12964	8109	7173	5473	10126	12789	10554	7769	61819	15246	9737	7176	10292	8686	6102	7655	5207	7017	9928	8717	10667	10832
213	11891	7521	6545	5169	9277	11951	9794	7094	57441	13997	8701	6388	9383	7939	5578	6917	4801	6651	9020	7918	9960	10158
214	11073	6726	5902	4409	8617	10825	9042	6635	53041	12896	8167	5937	8923	7204	5039	6335	4416	6045	8274	7630	9257	9266
215	10053	6431	5685	4073	7973	9917	8490	6254	49319	12016	7413	5609	8066	6618	4793	5863	4049	5515	7847	6884	8546	8680
216	9288	5848	5199	3907	7334	9229	8080	5847	45814	11323	7034	5119	7733	6221	4432	5356	3732	5037	7353	6359	8133	8049
217	8810	5454	4780	3578	6991	8836	7419	5471	42830	10448	6504	4878	7223	5938	4206	4955	3396	4841	6816	5991	7462	7571
218	8459	5201	4583	3366	6429	8452	6986	5307	40706	9913	5994	4502	6827	5539	3878	4654	3307	4518	6426	5699	7085	7209
219	7662	4752	4271	3224	6184	7917	6701	5036	38602	9382	5878	4214	6271	5284	3613	4343	3097	4165	6012	5312	6649	6781
220	7278	4695	4068	2975	5862	7658	6399	4712	36545	9037	5423	3885	6263	4904	3454	4015	2936	3976	5670	5030	6322	6545
221	6923	4323	3766	2845	5630	7239	5932	4517	35005	8654	5197	3737	5698	4676	3170	3808	2838	3827	5434	4733	6046	6042
222	6424	4146	3343	2604	5127	6751	5623	4224	32659	7968	4700	3524	5567	4403	3024	3457	2621	3379	5022	4435	5528	5679
223	5905	3859	3278	2296	4851	6210	5284	3920	30268	7386	4408	3186	5007	4011	2739	3211	2425	3276	4627	4224	5097	5399
224	5494	3491	2919	2232	4437	5856	4951	3727	28341	7033	3962	2949	4771	3714	2542	3051	2242	3050	4399	3865	4851	4950
225	5126	3221	2695	1999	4132	5470	4560	3465	26209	6482	3816	2678	4390	3502	2339	2724	2054	2758	3972	3629	4556	4662
226	4798	3076	2620	1869	3866	5070	4350	3232	24541	6010	3439	2564	3926	3160	2257	2531	1972	2502	3781	3402	4156	4303
227	4583	2824	2444	1807	3634	4735	3995	3139	23314	5881	3293	2353	3810	2920	2043	2320	1744	2434	3602	3216	3867	4048
228	4361	2593	2421	1638	3498	4487	3945	2906	21913	5473	3046	2204	3737	2887	1941	2278	1703	2245	3257	2968	3797	3817
229	3999	2586	2233	1623	3190	4306	3638	2750	20971	5298	2919	2145	3502	2717	1870	2125	1619	2206	3152	2848	3603	3673
230	3759	2447	2123	1488	3076	3998	3442	2668	20035	5087	2760	2109	3328	2580	1730	2044	1598	2118	3012	2742	3409	3455
231	3489	2262	1948	1408	2958	3932	3381	2606	19099	4846	2581	1879	3189	2455	1747	1835	1552	1994	2826	2621	3157	3352
232	3439	2245	1880	1370	2866	3639	3158	2562	18359	4484	2426	1922	3030	2268	1589	1758	1449	1877	2622	2450	3035	3143
233	3229	2062	1788	1343	2639	3627	3023	2346	17162	4170	2315	1705	2906	2145	1467	1666	1332	1766	2526	2339	2708	2944
234	3051	2129	1603	1158	2539	3198	2913	2121	16349	4070	2127	1622	2741	2096	1389	1699	1289	1686	2369	2287	2576	2847
235	2843	1936	1641	1117	2364	3097	2548	2003	15338	3841	1988	1558	2488	1832	1326	1527	1221	1577	2156	2073	2534	2704
236	2641	1780	1500	1129	2186	2921	2503	1926	14538	3560	1825	1431	2366	1814	1238	1362	1151	1576	2143	2000	2358	2534
237	2618	1709	1505	1007	2199	2736	2430	1945	14052	3451	1904	1411	2339	1715	1147	1286	1113	1423	1996	1904	2278	2475
238	2549	1719	1463	1046	2093	2677	2302	1788	13515	3434	1715	1323	2169	1614	1166	1245	1122	1409	1965	1721	2161	2313
239	2488	1609	1496	1048	1972	2578	2300	1827	13316	3312	1665	1323	2154	1552	1207	1289	1059	1470	1891	1755	2057	2300
240	2370	1590	1405	963	1984	2448	2166	1818	12626	3119	1642	1284	2091	1619	1183	1294	1062	1346	1733	1612	2015	2245
241	2317	1632	1354	963	1920	2375	2117	1743	12511	3022	1620	1304	2043	1584	1038	1233	1152	1392	1672	1671	1942	2244
242	2292	1522	1317	959	1929	2350	2092	1678	12446	3033	1574	1121	1933	1500	1062	1163	1037	1340	1736	1607	1933	2112
243	2292	1534	1321	959	1777	2226	1917	1692	11964	2921	1448	1150	1896	1443	1012	1150	1026	1297	1649	1584	1806	2115
244	2086	1430	1334	896	1819	2206	2012	1527	11672	2853	1437	1037	1792	1399	978	1074	998	1284	1585	1452	1824	2072
245	2050	1493	1261	862	1731	2113	1815	1531	11253	2762	1438	1146	1827	1366	909	1087	1035	1182	1480	1500	1749	1931
246	1990	1471	1239	823	1702	2144	1798	1551	10904	2740	1370	1060	1677	1287	940	1103	1008	1230	1545	1361	1698	1940
247	1994	1348	1263	853	1676	2039	1749	1467	10918	2496	1445	1071	1725	1318	976	1034	1006	1243	1412	1394	1692	1897
248	1944	1306	1267	844	1635	2031	1707	1469	10744	2439	1351	1022	1734	1240	855	1010	958	1188	1407	1317	1538	1939
249	1939	1356	1268	788	1565	2028	1687	1491	10679	2433	1276	1044	1590	1256	870	1044	947	1252	1408	1375	1598	1766
250	1902	1325	1577	843	1577	1942	1729	1418	10714	2518	1277	1029	1649	1263	1277	979	965	1144	1309	1324	1639	1792

## Sheet: Supplementary Data 8
Supplementary Data 8. Size profiles of cell-free DNA from Mouliere et al STM 2018*
Number of fragments
Cancer type	Bladder	Bladder	Bladder	Bladder	Bladder	Bladder	Bladder	Bladder	Bladder	Bladder	Bladder	Bladder	Bladder	Bladder	Bladder	Bladder	Bladder	Bladder	Bladder	Breast	Breast	Breast	Breast	Breast	Breast	Breast	Breast	Breast	Breast	Breast	Breast	Breast	Breast	Breast	Breast	Breast	Breast	Breast	Breast	Breast	Breast	Breast	Breast	Breast	Breast	Breast	Breast	Breast	Breast
Sample Size (bp)	SLX-12838.D706-D507	SLX-12841.D706-D502	SLX-10575.iPCRtagT014	SLX-11904.D709-D507	SLX-10572.D704-D505	SLX-10572.D708-D507	SLX-11896.D708-D504	SLX-11896.D707-D507	SLX-11896.D707-D508	SLX-11896.D709-D506	SLX-11904.D708-D504	SLX-11904.D709-D501	SLX-10572.D708-D508	SLX-11896.D707-D502	SLX-10572.D708-D505	SLX-11896.D709-D503	SLX-11896.D708-D503	SLX-12832.D712-D507	SLX-12838.D702-D505	SLX-11870.D710-D501	SLX-11034.A019	SLX-11870.D711-D502	SLX-13710.D706-D503	SLX-13710.D702-D507	SLX-13710.D701-D508	SLX-12841.D701-D503	SLX-12841.D705-D502	SLX-11043.D705-D506	SLX-11043.D702-D501	SLX-11043.D701-D501	SLX-11043.D705-D508	SLX-11043.D704-D508	SLX-11043.D704-D505	SLX-11043.D703-D503	SLX-11042.D703-D508	SLX-11042.D704-D504	SLX-11042.D704-D502	SLX-11042.D705-D502	SLX-11042.D705-D504	SLX-11042.D701-D505	SLX-11042.D701-D507	SLX-11042.D702-D506	SLX-11042.D702-D508	SLX-11042.D703-D506	SLX-11042.D706-D502	SLX-11042.D706-D503	SLX-11042.D706-D504	SLX-11043.D703-D502	SLX-11043.D701-D504
30	216	429	3	0	939	0	36	376	401	325	22	10	16	153	23	364	139	409	624	12	12	83	12	11	13	392	74	17	19	54	24	42	53	57	38	35	12	55	17	54	35	69	52	72	45	46	89	231	72
31	237	475	7	0	1012	6	40	364	440	335	26	7	22	157	32	358	139	422	671	10	13	102	9	25	10	414	73	14	16	66	22	41	49	56	29	48	14	63	14	48	50	87	40	76	34	53	92	215	97
32	245	519	3	2	1140	3	44	439	451	341	27	15	20	201	35	393	148	508	746	5	7	109	13	6	8	461	93	13	23	75	31	37	54	58	40	40	10	59	15	74	49	97	61	91	49	53	96	260	78
33	246	565	5	1	1303	3	53	440	500	387	27	5	23	205	32	488	195	540	809	4	17	118	13	17	11	521	78	18	22	66	21	46	70	67	47	48	14	66	12	65	54	100	55	90	58	70	96	278	107
34	305	582	2	1	1511	5	75	487	606	427	41	8	27	233	38	522	188	603	874	8	14	147	13	17	15	674	104	22	14	89	19	68	83	76	57	55	13	73	14	74	53	123	59	75	52	67	120	358	111
35	298	621	2	3	1815	5	62	603	594	512	38	12	37	270	47	563	207	714	1059	9	20	155	16	17	16	723	126	16	18	101	42	62	80	86	56	56	13	87	22	100	64	145	93	123	66	71	126	385	126
36	356	736	10	2	2221	4	86	678	694	549	39	23	43	308	44	574	257	797	1077	10	20	199	13	17	13	734	150	20	26	105	48	66	102	91	60	79	17	89	17	98	73	172	57	147	75	100	142	489	152
37	405	811	5	4	3086	8	94	832	720	657	38	14	42	283	58	670	289	938	1341	11	29	207	15	26	22	920	138	32	36	109	33	74	126	112	68	68	18	99	22	115	83	225	77	140	90	108	160	650	145
38	436	990	8	3	4193	6	127	961	908	775	75	14	42	391	64	794	315	1208	1579	20	38	271	22	25	16	1098	150	37	22	139	61	92	120	151	82	89	18	131	18	134	80	268	99	199	133	140	186	800	197
39	555	1149	18	7	5461	13	136	1164	1015	875	73	17	60	430	89	811	350	1403	1821	19	32	309	26	28	23	1167	185	36	43	148	58	108	132	179	107	99	22	160	26	147	137	273	132	251	129	144	208	906	228
40	536	1139	9	11	5090	9	145	1155	1071	845	85	33	61	430	70	881	349	1373	1821	22	49	290	24	30	29	1216	181	47	35	149	47	111	148	158	127	99	22	170	25	168	121	313	110	231	164	164	249	892	227
41	472	1071	10	7	4113	5	133	1036	937	814	80	22	52	439	95	890	376	1362	1757	27	66	278	29	37	26	1099	180	61	38	165	58	101	135	155	108	88	24	162	29	172	101	278	134	236	123	141	242	801	229
42	513	1199	11	6	3717	5	116	1020	979	804	93	26	64	502	83	931	371	1378	1823	32	62	303	30	26	24	1224	170	43	48	150	43	113	149	190	104	106	28	148	38	197	134	325	131	248	129	155	246	857	224
43	556	1144	27	5	3661	13	151	1067	1011	872	122	37	60	512	99	1001	387	1460	1856	25	80	336	31	46	30	1289	185	58	46	168	51	111	149	182	110	111	36	178	34	207	110	348	142	230	126	152	267	918	251
44	555	1232	20	10	4025	8	141	1158	1141	916	121	39	77	551	92	1148	421	1501	1964	29	97	377	26	56	30	1342	246	75	44	192	76	130	187	194	124	117	43	169	42	189	129	424	155	296	148	159	269	1035	261
45	561	1207	34	12	4493	11	153	1248	1195	915	167	52	76	569	99	1198	484	1643	2146	28	95	442	29	68	40	1457	236	78	59	209	77	161	180	222	149	122	38	191	48	211	137	459	151	310	151	177	293	1243	239
46	585	1383	49	13	5298	12	179	1359	1255	1112	202	45	82	695	110	1316	505	1757	2337	42	120	531	37	56	29	1523	261	101	72	237	69	163	238	246	132	136	52	223	45	246	165	561	171	333	187	231	318	1459	357
47	710	1551	63	13	6439	17	211	1520	1354	1194	213	72	105	707	118	1426	552	2013	2602	42	155	583	46	87	57	1802	269	141	99	280	106	199	216	254	163	151	63	269	61	285	212	636	217	374	219	243	367	1665	350
48	782	1709	60	15	8374	18	238	1796	1549	1441	301	80	131	817	141	1589	621	2525	3152	50	192	708	61	116	70	2131	294	193	113	282	118	209	276	350	199	181	72	337	78	350	237	698	242	396	266	272	424	2111	440
49	923	2135	78	28	11121	16	272	2160	1885	1618	390	106	142	935	169	1826	644	3188	3717	61	259	738	82	189	90	2474	318	258	139	387	143	276	341	430	236	226	125	371	97	421	265	809	280	503	352	324	467	2526	584
50	1013	2334	93	42	13027	20	311	2308	2000	1856	514	114	141	1080	146	2039	779	3663	3884	86	305	726	86	241	99	2682	363	321	161	383	142	298	376	488	245	250	107	454	108	477	336	884	264	543	383	366	559	2496	587
51	955	2212	92	41	9718	19	317	2086	1955	1613	442	116	125	1074	155	2143	755	3269	3795	74	273	747	83	244	115	2533	363	343	174	401	121	302	349	427	248	235	120	413	103	482	299	780	315	547	358	385	523	2324	553
52	951	2059	88	34	8133	19	283	1927	1885	1555	432	115	124	1067	159	2120	724	3115	3648	81	300	765	82	250	130	2381	369	303	150	422	127	290	329	442	257	237	99	391	103	438	284	838	325	545	324	344	528	2075	549
53	905	2115	80	30	7707	33	272	1864	1874	1478	475	104	136	1087	157	2238	783	3145	3728	86	323	838	110	289	130	2462	364	311	153	412	129	296	381	424	269	238	122	441	113	442	275	928	318	545	333	370	500	2066	539
54	887	2204	105	31	7634	21	265	1929	1906	1555	482	115	127	1109	190	2329	794	3125	3884	67	320	852	126	265	111	2536	398	305	174	448	136	287	369	449	269	278	117	442	111	469	288	1037	287	567	359	363	534	2184	567
55	971	2292	130	41	8136	21	301	2026	2036	1668	501	132	141	1189	185	2416	824	3250	4082	85	358	952	121	317	125	2632	380	334	178	497	124	304	359	485	253	259	124	456	124	485	352	1185	353	582	355	367	574	2320	587
56	961	2345	132	40	9164	25	344	2180	2119	1744	606	158	136	1349	177	2673	877	3551	4123	90	447	1101	117	314	166	2771	425	398	217	513	144	360	430	551	303	291	148	488	141	540	364	1307	430	627	393	387	598	2592	619
57	1142	2682	128	60	10348	24	382	2317	2185	1912	690	167	160	1348	208	2827	883	3833	4801	114	527	1174	150	375	175	3065	412	485	228	550	166	413	483	649	326	312	161	568	159	606	394	1437	434	733	442	469	673	2818	675
58	1191	2740	179	61	12549	42	448	2607	2357	2080	874	229	193	1463	217	2915	975	4389	5228	108	654	1251	177	467	217	3357	468	659	308	600	208	411	544	703	375	382	202	681	215	747	444	1545	461	810	520	511	737	3268	796
59	1372	3139	217	84	15070	43	464	2944	2671	2314	1058	252	225	1615	268	3164	1063	5195	5951	179	823	1493	210	671	256	3895	520	890	383	728	198	512	643	819	424	416	277	815	270	797	554	1634	562	961	642	642	801	3838	1014
60	1366	3255	275	90	17231	46	467	3084	2630	2380	1244	298	223	1722	273	3268	1062	5904	6304	207	1020	1597	231	869	324	3862	509	987	414	760	253	510	618	903	470	416	314	787	264	861	620	1646	565	979	691	671	797	4038	1099
61	1309	2963	256	83	16105	38	465	2988	2461	2380	1211	302	245	1698	290	3206	1029	5483	5791	215	918	1522	286	838	311	3719	508	1018	435	779	243	500	597	851	498	451	324	818	307	873	586	1575	565	933	661	607	795	3689	1047
62	1173	2752	240	97	13388	34	444	2756	2372	2138	1192	279	169	1617	267	3062	1032	5047	5459	175	871	1356	241	777	310	3358	511	877	404	751	240	494	573	831	440	413	286	799	265	881	571	1548	529	886	600	603	825	3165	991
63	1112	2574	223	90	12740	40	413	2572	2251	2055	1105	279	175	1566	240	3024	968	4838	5119	173	857	1344	227	902	298	3218	499	978	437	729	231	501	579	772	426	362	256	757	253	725	539	1648	510	893	621	586	802	3216	945
64	1097	2540	219	83	12777	41	411	2545	2276	2004	1151	268	184	1675	243	3050	922	4826	5047	188	922	1449	245	941	296	3054	500	943	391	713	244	501	543	857	401	376	266	799	232	781	549	1813	551	899	593	575	802	3240	997
65	1043	2458	262	94	12977	47	422	2581	2233	2046	1200	272	177	1687	238	3000	998	4557	4969	186	913	1528	269	894	328	3007	462	898	431	742	233	521	599	815	440	384	280	838	247	864	534	1877	579	876	618	603	810	3402	1039
66	1043	2301	251	106	14008	37	421	2704	2220	2038	1290	297	197	1728	256	3046	944	4667	4903	225	940	1636	257	889	361	2871	494	1035	470	767	263	539	641	855	442	384	278	817	289	830	591	2016	587	849	615	645	785	3525	954
67	1031	2420	312	92	15003	37	491	2785	2215	2120	1394	322	202	1793	268	3107	959	4818	5197	198	1089	1682	254	893	344	2918	490	1089	489	852	283	563	637	891	499	461	338	955	362	906	607	2182	605	905	642	598	834	3864	1008
68	1120	2657	334	123	17837	49	506	3055	2492	2391	1626	368	244	1889	308	3349	1098	5509	5728	229	1309	1847	308	974	403	3004	516	1195	579	898	299	603	760	1050	533	508	389	1057	338	1064	655	2272	696	1012	739	653	884	4315	1132
69	1283	3015	449	141	21867	62	643	3558	2855	2801	2142	461	314	2109	318	3598	1220	6911	6617	349	1647	2046	401	1323	519	3446	583	1695	689	1027	334	707	874	1246	682	589	471	1265	451	1258	820	2385	780	1139	963	886	1010	5021	1381
70	1449	3278	517	203	26360	78	740	4018	2942	3199	2481	578	354	2247	334	3970	1336	8141	7449	409	1957	2022	455	1757	565	3700	658	1947	798	1219	364	866	965	1498	726	708	594	1562	494	1422	919	2608	916	1277	1137	971	1123	5279	1537
71	1298	3005	423	171	23935	91	700	3616	2814	2865	2273	543	292	2145	345	3877	1206	7747	6984	388	1897	1815	406	1840	522	3466	644	1923	786	1197	372	777	947	1393	743	612	540	1331	501	1407	883	2410	878	1167	1048	900	1074	4605	1549
72	1174	2700	404	129	19328	39	578	3081	2513	2464	2068	521	288	2102	299	3476	1165	7013	6149	351	1832	1714	383	1762	487	3196	559	1823	693	1162	342	739	835	1236	632	546	478	1221	483	1216	824	2301	803	1150	1008	841	1010	4122	1524
73	1155	2479	390	120	17536	58	558	2931	2414	2329	1973	461	242	1968	297	3488	1013	6675	5798	327	1759	1738	371	1767	529	3086	611	1900	668	1154	331	702	855	1161	553	538	503	1199	440	1261	807	2467	803	1057	1007	792	984	3971	1491
74	1061	2610	427	121	17200	67	566	2999	2449	2278	2038	419	239	2011	300	3388	1105	6559	5832	342	1806	1809	410	1774	511	3175	574	1866	721	1179	332	698	872	1190	638	552	508	1297	457	1257	782	2719	806	1150	933	814	1011	3964	1487
75	1092	2573	421	170	17320	56	602	3063	2578	2336	2236	479	272	2147	326	3631	1149	6612	5959	398	1851	2008	439	1817	551	3188	565	2010	769	1215	351	758	937	1230	687	595	537	1436	539	1374	834	2925	888	1179	970	825	1107	4056	1519
76	1128	2566	512	162	18288	59	616	3113	2589	2506	2265	526	265	2247	331	3677	1139	6576	5954	398	1982	2100	473	1749	604	3173	572	2021	831	1233	383	785	896	1305	719	599	548	1430	550	1415	903	2975	938	1254	1021	824	1104	4126	1480
77	1194	2639	511	165	19693	65	712	3260	2732	2547	2511	567	262	2353	339	3851	1188	6899	6165	444	2204	2169	483	1734	664	3143	607	2241	899	1355	422	897	1019	1502	820	650	648	1556	565	1513	964	3430	1029	1345	1016	1021	1208	4489	1536
78	1297	2859	587	204	22340	93	872	3595	3160	2962	3344	716	363	2626	441	4251	1336	7748	6840	524	2634	2480	593	1889	862	3513	646	2513	1115	1676	504	1053	1223	1905	936	764	823	1986	636	1880	1226	3669	1205	1468	1223	1166	1317	5198	1770
79	1437	3323	888	292	27939	111	1099	4475	3949	3828	4670	1050	510	3198	555	5095	1716	10117	8451	807	3717	2879	786	2431	1107	4485	771	3361	1504	2082	643	1405	1546	2445	1253	1117	1136	2648	903	2709	1547	3956	1494	1853	1613	1544	1774	6564	2110
80	1866	3955	1140	401	35218	140	1421	5461	4716	4372	6068	1453	645	3715	717	6058	1956	13034	10338	1152	4867	3256	923	3126	1395	5318	871	4464	1973	2460	790	1881	2019	3216	1565	1356	1460	3340	1136	3278	1969	4366	1951	2268	2086	2025	2104	7841	2741
81	1889	3765	1207	461	35997	143	1364	5412	4631	4361	6211	1363	654	3787	701	6105	1965	13671	10506	1132	4968	3180	975	3367	1418	5080	857	4766	1987	2483	835	1850	2114	3267	1619	1398	1544	3378	1159	3195	2063	4343	1963	2288	2142	1973	2044	7502	2678
82	1527	3171	906	320	28152	111	1064	4381	3744	3421	4729	1024	489	3106	536	4959	1566	10404	8332	885	3801	2768	788	3020	1072	4192	764	3788	1605	2063	649	1511	1639	2477	1282	1142	1179	2897	965	2634	1604	3909	1633	1932	1768	1562	1649	5912	2259
83	1172	2594	710	210	22218	89	737	3304	2887	2707	3322	738	337	2578	380	4071	1231	8154	6520	618	2951	2312	624	2530	886	3353	657	3294	1190	1838	517	1164	1194	1865	1059	858	874	2079	775	2082	1199	3493	1252	1575	1387	1197	1306	4929	1898
84	1079	2529	540	179	20489	77	660	3067	2669	2549	3076	687	293	2479	389	3962	1139	7658	6091	536	2871	2366	612	2664	829	3174	617	3258	1057	1695	428	1055	1125	1603	916	805	835	1939	754	1842	1098	3639	1235	1624	1320	1077	1223	4589	1829
85	1117	2530	642	237	19921	80	657	2897	2560	2339	3048	671	336	2471	375	4094	1111	7928	6233	602	2947	2560	685	2773	878	3315	594	3391	1163	1687	437	1119	1141	1743	979	777	828	1889	772	1912	1124	3933	1258	1673	1343	1136	1233	4919	1882
86	1215	2665	652	233	20562	103	728	3090	2691	2493	3444	739	372	2590	382	4339	1218	8480	6694	661	3304	2788	717	3003	908	3605	600	3688	1144	1928	487	1209	1252	1824	1069	857	881	2095	844	2026	1240	4558	1361	1933	1420	1155	1364	5260	1964
87	1227	2730	681	258	21344	86	721	3135	2829	2660	3653	813	375	2694	419	4339	1222	9122	7033	750	3530	3095	729	3091	1006	3676	610	3955	1348	2009	583	1295	1274	1913	1130	905	1021	2381	903	2219	1330	4973	1441	2091	1575	1295	1332	5693	2144
88	1408	3091	842	286	22889	102	858	3531	2946	2939	4418	928	420	2853	494	4525	1309	9964	7792	919	3973	3513	807	3368	1087	4060	653	4431	1395	2273	569	1437	1474	2283	1345	1065	1128	2555	1029	2559	1458	5431	1680	2217	1811	1557	1467	6383	2312
89	1672	3587	1098	372	25261	124	1197	4190	3656	3548	5894	1242	586	3439	599	5297	1581	12730	9421	1291	5138	4509	1037	4077	1534	4913	766	5586	1882	2822	836	1875	1905	3062	1697	1405	1526	3451	1262	3264	1956	5871	1953	2609	2264	1973	1889	8216	2858
90	2059	4457	1534	532	30365	160	1536	5113	5074	4847	8496	1836	780	4261	771	6614	1929	17500	12167	1756	7126	5188	1472	5750	1910	6562	934	7686	2763	3665	1154	2749	2679	4276	2209	1979	2290	4745	1744	4608	2636	6534	2674	3333	3119	2634	2512	10371	3779
91	2328	5116	2015	683	33122	198	1824	6095	5913	5381	10416	2211	961	4955	984	7769	2303	22170	14277	2256	8686	5233	1677	7410	2463	7719	1077	9777	3483	4587	1436	3383	3382	5223	2665	2490	2712	5747	2093	5529	3275	6816	3273	4040	3910	3148	2969	11708	4635
92	2276	4877	2029	726	29795	196	1722	5735	5820	5204	10476	2264	1008	5064	954	7576	2219	21856	14171	2305	8785	5003	1672	7990	2433	7907	950	9898	3438	4634	1350	3444	3408	5266	2807	2468	2673	5813	2265	5347	3284	6662	3231	3974	3886	3138	3024	10915	4913
93	1989	3999	1508	551	24921	159	1379	4667	4454	4128	8006	1769	765	4292	756	6383	1781	17987	11673	1788	7242	4330	1450	7004	2022	6463	874	8560	2960	3963	1166	2787	2604	4183	2204	1952	2123	4618	1825	4405	2576	6015	2651	3549	3315	2460	2449	8723	4324
94	1646	3408	1142	386	22644	146	1104	3784	3495	3310	6026	1329	561	3448	573	5585	1556	14920	9719	1440	6133	3961	1192	6055	1618	5492	811	7355	2223	3477	943	2270	2092	3153	1878	1504	1671	3715	1493	3280	1986	5720	2236	3062	2817	1940	2004	7397	3729
95	1446	3152	1066	330	22413	133	964	3487	3289	2885	5533	1282	501	3285	546	5182	1384	14241	8917	1279	5795	4002	1176	5551	1526	5245	740	6757	1968	3393	815	1993	1894	2888	1750	1453	1461	3366	1449	3007	1777	5845	2062	2850	2652	1811	1799	6891	3486
96	1472	3104	1105	386	22691	121	990	3437	3227	3155	5550	1285	529	3452	562	5478	1440	13776	9165	1351	6081	4179	1195	5220	1597	5047	663	6487	2014	3282	853	2080	1938	3032	1821	1447	1444	3500	1501	3171	1873	6345	2172	2923	2680	1758	2035	6977	3444
97	1491	3200	1274	400	23346	131	1065	3715	3334	3227	6157	1452	659	3672	637	5979	1459	14301	9724	1565	6445	4487	1289	5060	1727	5508	737	6772	2328	3581	994	2273	2104	3355	1841	1711	1748	3912	1662	3456	2009	6838	2401	3136	2758	2029	2219	7398	3472
98	1770	3611	1518	495	24470	157	1274	4170	3768	3649	7498	1789	712	4150	717	6483	1682	15382	10818	1918	7286	5044	1557	5356	2064	6023	773	7384	2839	4099	1173	2760	2587	3936	2364	1926	2105	4637	2027	4225	2469	7475	2843	3401	3048	2437	2571	8028	4020
99	1973	3977	2005	634	26725	164	1544	4913	4746	4492	9715	2148	917	4709	945	7492	2022	17309	11964	2327	8400	5743	1851	5927	2602	6981	933	8504	3596	4785	1441	3526	3137	5082	2654	2524	2669	5758	2489	5265	3101	7886	3485	3828	3468	2994	3157	9308	4607
100	2099	4389	2240	712	28922	231	1862	5744	5485	5179	11892	2546	1089	5309	1098	8363	2254	20320	13508	2901	9535	6175	2223	7218	2915	8072	1002	10328	4333	5374	1694	4113	3793	6020	3157	3053	3341	7078	2877	6292	3872	8516	3984	4618	4110	3603	3565	10609	5515
101	2407	4933	2441	820	30414	241	2004	5945	5872	5470	12780	2865	1193	5530	1157	8683	2402	23563	14831	3099	10567	6732	2411	9126	3183	8974	1144	12183	4610	6082	1930	4500	4333	6658	3559	3375	3637	7756	3101	6775	4096	8911	4278	5187	4719	4015	3908	12048	6463
102	2351	4851	2439	906	29806	233	2024	5926	5592	5474	12556	2819	1201	5674	1108	8592	2421	24998	15462	3285	10919	7102	2591	11150	3262	9658	1168	13458	4717	6484	1841	4696	4348	6696	3647	3395	3667	7878	3268	6812	4120	9124	4329	5697	5200	4184	3938	12435	7421
103	2393	4588	2319	830	27128	205	1844	5403	5307	5183	11893	2780	1090	5531	1044	8555	2203	24134	14509	3220	10789	7076	2710	12117	3256	9700	1124	13730	4612	6611	1855	4548	3979	6364	3650	3141	3452	7643	3185	6565	4090	9069	3997	5967	5081	3930	3865	11808	7905
104	2147	4348	2157	714	25235	191	1588	4868	4838	4535	10882	2471	971	5139	973	7939	2200	22397	13377	2985	9893	6926	2721	11940	3107	9109	1011	12828	4172	6669	1678	4305	3781	5997	3261	2949	3237	6880	3153	5974	3686	9105	3837	5889	4797	3440	3566	10902	8106
105	2036	4069	1965	602	23959	194	1513	4543	4532	4281	10029	2306	913	5053	880	7548	1952	21399	12885	2845	9695	6765	2671	11605	2887	8434	997	12436	4086	6500	1596	4015	3383	5372	3308	2847	3087	6696	3019	5419	3383	9513	3825	5648	4876	3320	3434	10632	7948
106	2114	4186	2068	643	24922	190	1520	4550	4382	4236	10194	2396	973	4916	898	7727	1958	21146	12863	2807	9958	7014	2726	10975	2996	8687	1021	12405	4074	6732	1712	4080	3492	5492	3314	2842	3035	6874	3121	5455	3466	10063	4020	5707	4764	3375	3667	10585	7773
107	2151	4269	2202	667	24621	218	1676	4647	4487	4571	10822	2597	1012	5225	982	8049	2028	21590	13526	3042	10388	7459	2846	10737	3288	8976	985	12566	4268	7062	1732	4285	3742	5912	3401	3079	3298	7247	3356	6071	3577	10618	4289	5818	5040	3613	3687	11330	7925
108	2280	4576	2368	736	25767	215	1868	5227	5037	4741	11996	2886	1155	5711	1026	8494	2217	22577	14345	3305	11287	8287	2901	10596	3599	9408	1110	13193	4642	7507	1897	4793	4220	6740	3996	3536	3617	8146	3744	6702	4001	11378	4693	6264	5536	4038	4056	12339	8045
109	2388	4986	2887	845	27450	262	2155	5809	5696	5602	14399	3178	1261	5941	1166	9293	2479	24305	15437	3691	11990	9209	3248	11025	4045	10257	1228	14380	5477	8008	2279	5477	4916	7689	4439	4088	4311	9571	4260	8137	4768	12359	5312	7152	5968	4966	4665	13995	8789
110	2900	5504	3219	1093	30011	333	2434	6887	6878	6586	17705	3821	1513	6867	1462	10339	2963	27924	17856	4555	13363	10059	3749	12284	4696	12061	1332	16924	6483	9381	2693	6916	6053	9377	5165	5026	5415	11795	4938	9951	5822	13507	6226	8445	7003	5861	5530	16325	9851
111	3117	6132	3737	1280	32047	348	2743	7622	8135	7187	21183	4292	1774	7553	1667	11196	3231	32028	20282	5251	14583	10870	4193	13766	5306	13756	1535	19387	7626	10384	3109	7816	7241	11079	5962	5896	6204	13821	5547	11240	6852	14778	7240	9421	8157	7127	6219	18033	11064
112	3248	6080	3648	1204	32147	332	2815	7556	7951	7202	21187	4046	1635	7457	1648	11469	3306	32124	20273	5136	14651	10936	4331	14371	5269	13728	1669	19850	7713	10480	3129	7821	7341	10989	6078	5705	6103	14199	5652	11572	6740	15338	7315	9588	8460	6948	6170	17792	11477
113	2789	5498	3145	1040	29276	323	2339	6548	6706	6318	17650	3648	1413	6592	1407	9782	2777	28387	17803	4397	13364	10195	4127	13346	4826	12453	1445	18433	6867	9599	2825	7043	6240	9548	5419	4948	5370	12222	4991	9920	5953	15400	6425	8965	7532	6035	5437	15866	10576
114	2538	5077	2684	871	26933	272	2055	5599	5754	5528	15110	3188	1212	6105	1149	9038	2461	25693	16326	3991	12224	9618	4012	12701	4494	11350	1289	16947	5596	8915	2468	6184	5293	8136	4995	4432	4716	10824	4569	8723	5248	15509	5826	8265	7130	5488	4953	14647	9711
115	2525	5129	2705	863	25710	239	2013	5535	5541	5416	14427	3084	1184	6117	1147	8913	2486	25355	16356	3895	11995	9979	3837	12434	4405	11161	1282	17107	5585	8774	2457	5876	5298	7998	4856	4329	4590	10716	4620	8595	5022	15939	5574	8349	7077	5248	5076	14412	9693
116	2796	5521	2914	848	25461	279	2035	5476	5694	5396	15505	3215	1247	6252	1249	9415	2522	26190	17118	4189	12649	10676	4016	13059	4859	11846	1308	17773	5933	9272	2658	6370	5533	8530	5201	4687	4886	11360	4889	9067	5203	16931	6003	9100	7537	5520	5329	15670	10044
117	2972	5853	3055	862	25315	280	2278	5823	5932	5688	16701	3593	1392	6675	1268	10202	2686	27873	18314	4491	13189	11723	4109	13110	5156	12347	1392	18847	6325	9839	2761	6853	6150	9268	5620	4861	5153	12210	5303	9835	5749	17278	6546	9441	8103	5847	5860	16727	10520
118	3146	6127	3261	989	25943	331	2504	6288	6690	6332	18610	3896	1504	7145	1416	11278	2927	29527	19612	4840	14090	12632	4305	13179	5541	12963	1526	19076	7026	10526	3087	7617	6688	10050	6315	5277	6021	13104	5865	10926	6159	17448	7280	10086	8507	6590	6473	17930	11208
119	3566	6827	3744	1171	25889	404	2746	7207	7541	6982	21915	4389	1688	7905	1681	12136	3146	32900	22027	5576	15367	13988	4943	13996	6386	14186	1711	20336	8346	11990	3709	8920	8197	12058	7002	6254	6744	15493	6726	12732	7605	18536	8434	10825	9516	7525	7717	19953	12540
120	4194	7887	4836	1495	27228	471	3465	8857	9767	8501	28522	5479	2006	9389	2119	14906	4149	40345	26265	6880	18379	15665	5955	16112	7746	16936	2087	24176	10911	14931	4675	11360	10772	15351	8951	7904	8677	19619	8228	16295	9460	20459	10390	12912	11614	9692	9944	23614	15410
121	5286	9621	6416	1929	27760	588	4597	11242	12725	11000	37580	7381	2733	11965	2867	19725	5324	51515	33425	9457	22524	17436	7587	20206	10106	21399	2670	31320	14539	18716	6442	15185	14589	20141	11479	10130	11412	26070	10545	21012	12433	24311	13319	16595	15203	12568	13044	27962	19764
122	6159	10896	7556	2304	28172	760	5432	12833	14914	12820	44777	8894	3371	13904	3403	23534	6362	60129	38980	11417	26352	18968	8894	24793	11915	25046	3048	37905	17557	22592	7758	18285	17853	24443	13503	11724	13416	30278	12916	24563	14650	27274	15610	20184	17980	14375	15098	30416	23949
123	6006	10728	7165	2253	26790	673	5114	12203	14246	11886	42545	8537	3104	13480	3258	22807	6198	58807	37925	10914	25720	18870	9542	25869	11620	25117	2939	38901	17416	21899	7527	17858	17066	23244	13119	11521	13077	29097	12286	23672	14006	27350	15234	20902	18300	14058	14316	29370	24053
124	5048	9210	5618	1700	26311	587	3863	9535	11103	9666	33083	6638	2453	11111	2491	18157	4802	50452	31359	8709	21517	17785	8527	25063	9725	21620	2458	35169	13399	18940	5842	14309	13314	17971	10711	9019	10207	22971	10234	18510	10978	25346	12390	19259	15563	11309	11268	25914	21155
125	4370	8027	4363	1267	25223	441	3106	7438	8711	7827	25343	5387	1826	9309	1864	15092	3941	45545	26790	7053	19263	17630	8183	26435	8302	20283	2073	33780	10466	16473	4549	11586	10423	14693	9337	7753	8214	18447	8322	15124	8772	23860	10213	19400	14196	9087	9490	23821	19813
126	4474	7891	4026	1274	25035	420	2956	7031	7914	7572	23639	5155	1784	8818	1755	14676	3810	47277	26912	6971	20221	18938	8649	29842	8500	21927	2103	36149	10082	16827	4457	11292	9791	14027	9392	7608	7831	18154	8370	14549	8218	24281	10035	22272	15082	8843	9814	25068	20864
127	4647	8599	4377	1263	24899	483	3216	7229	8337	7859	24837	5795	2037	9820	1795	16033	4078	51620	29027	7724	22206	20967	9575	34258	9328	24509	2191	40454	10938	18203	4828	12300	10745	15251	10518	8440	8445	19212	9058	15500	9003	26093	10707	26037	16931	9655	10745	27228	23568
128	5101	9175	4768	1555	24993	539	3456	7989	9200	8617	27933	6445	2266	10708	1962	18050	4425	56195	31918	8794	24669	23483	10455	36237	10393	27057	2427	43976	12305	19932	5407	13983	11977	16972	11703	9458	9421	21357	10170	17333	9721	27717	12171	28351	18731	10642	12446	29344	25929
129	5752	10105	5618	1681	25066	615	3925	8912	10340	9705	31440	7498	2523	11857	2303	20625	5014	62418	35299	9968	27155	25774	11004	37903	11903	29599	2695	47300	14059	22635	6102	15655	14065	19804	13563	10732	10731	24364	11563	19897	11445	29662	13906	30298	20622	12168	14264	32079	28684
130	6760	11516	6713	2101	25150	797	4812	10991	13035	11830	38152	9320	3140	14314	2770	25218	6276	71658	42127	12247	31724	29458	12382	40268	13849	33245	3046	52504	17284	26309	7567	19156	17535	24282	16291	12884	13136	29545	14071	24007	13800	32686	16663	33147	23533	14840	18037	35454	32890
131	8557	13925	8630	2654	25406	1006	6256	13901	16404	14978	49608	12113	4205	17887	3696	32907	8100	87676	52595	15843	38780	34104	14937	45924	17450	39414	3854	62881	22980	32928	10008	24535	23462	30883	20589	16242	17151	38075	17766	30833	17986	38069	20872	38810	29391	18815	23695	41972	39787
132	11023	17152	11576	3481	25334	1303	8203	17888	22226	19796	65601	16187	5624	23677	5165	44258	11122	109146	67911	21178	48440	39600	18380	54976	22576	49803	4886	77961	31744	41666	13723	32788	31943	40825	26562	20897	22538	49711	23908	40667	24016	45528	26963	47202	37304	24266	31383	50256	51167
133	13633	20648	14295	4325	24921	1538	9874	22000	27564	23924	81618	20577	7016	28980	6216	54935	13542	127902	82127	26922	57559	44067	21657	62869	27858	58913	5789	91789	40389	50656	17622	40968	40744	51471	32013	25069	28531	61285	29550	50172	30037	52577	33054	56093	45530	29260	37982	57360	61949
134	14266	21316	14989	4566	24319	1606	10173	22944	28563	25065	85033	22107	7174	30401	6617	58385	14773	130664	86451	27853	59150	46060	22794	64142	29276	61673	6035	94728	42956	53540	18377	42808	42576	53463	33730	26183	29685	63506	31081	52329	31145	54811	34137	58259	47886	30621	38788	58704	65101
135	13129	19538	12822	3892	23874	1455	9093	19869	24857	22433	74523	19090	6528	27814	5595	52629	12475	122223	78842	24724	54208	44792	21516	58568	26854	57024	5351	88095	38596	49579	15892	38273	36869	47450	31387	23228	26188	55889	28124	46747	27055	52418	31662	55234	44448	27425	35151	53869	60951
136	11642	17685	11401	3340	23654	1361	7970	17166	20762	19300	65131	17416	5571	25361	4974	47349	11194	114514	72339	21724	50259	44216	20531	54017	24451	53751	4987	81383	33921	45915	13705	34567	32306	42733	29305	20794	23181	49249	26132	42335	23383	50162	29131	52285	41431	24409	34137	51250	56336
137	12325	18021	11985	3416	23914	1420	8361	17377	20999	19768	66957	18324	5847	26312	4648	49933	11551	117658	75073	22984	51799	46350	21048	51915	25654	55168	5022	80951	34595	47182	14135	35609	32739	43970	30559	21384	23283	50491	28146	43640	23703	53131	30743	53460	42034	24927	37122	52422	57279
138	14198	20492	14412	4039	23740	1702	9774	20409	23690	22835	78702	21988	7040	30633	5619	59553	13518	128654	86921	27201	57517	51445	23281	52495	29097	61946	5752	85767	41434	52139	16647	41652	38301	51326	35361	24291	27499	58926	33482	50451	27670	58806	36195	59069	45575	28676	44510	57807	62460
139	16958	23902	17719	4876	23707	2108	12126	24868	29608	28247	96843	26700	8884	37234	7090	72618	16765	144066	105404	33740	65201	57008	26823	54997	34961	70928	6819	93285	51732	60516	21074	50936	48433	62628	41583	29676	34119	72232	41170	61748	35039	67009	44195	65897	52154	35012	54623	65809	69841
140	20928	28437	21657	6162	23974	2603	14477	31255	37511	34409	120189	33089	10881	44734	9387	87594	20585	161036	125635	41586	73136	62372	32169	58017	41109	81769	8048	102193	65266	70043	26592	63436	61071	76426	49439	36474	42766	90244	50121	75430	43887	73178	52482	74461	59179	42895	66097	73422	78687
141	23874	32062	24740	6998	23603	2819	16726	35822	43828	39926	136720	37465	12624	51128	11109	98556	23801	172804	142830	47350	78651	66143	36130	62199	45825	92087	9309	111449	75658	77249	31715	72982	71545	86281	55183	41826	49963	104740	57055	86250	51094	78173	58839	81764	64328	49118	74042	79981	86015
142	25452	33724	25495	7436	23686	3030	17156	37064	45407	41782	142643	39339	13203	53529	11719	103095	25102	179821	149899	49799	81667	68064	39480	68348	47428	99062	9589	119080	80168	81052	33812	77692	75276	89962	58075	44419	53277	109478	60612	90419	53834	80416	60916	88395	67571	52558	76051	82989	90597
143	25852	34043	25692	7364	22914	3100	17231	37084	44668	41658	142191	38661	13200	53505	11779	103116	25180	182914	152623	50162	81404	70423	42028	75877	48483	105863	10061	127410	82185	83406	33618	78874	75289	91082	59311	45212	53590	110606	61748	91265	53249	80759	61453	96434	69484	53613	76639	85158	95384
144	26492	34590	25614	7359	22745	3084	17838	37078	45342	42738	143760	38421	13325	54758	12093	105224	25483	186579	156380	50294	83029	73003	45046	84950	49274	112888	10499	135032	83991	86603	34488	80840	77079	92647	61596	47334	54670	111301	63898	93867	54653	84404	62687	103870	72252	54816	76579	89187	102818
145	26646	34903	26222	7257	22327	3153	18120	37808	45906	43765	146193	39700	14009	56284	12443	107628	26403	190015	158150	50873	83888	74399	48216	90187	50208	117989	10621	140983	86451	90746	35472	82707	78954	94371	63322	48753	56491	113342	64798	96574	55341	86536	65096	110293	74790	56806	78481	91276	107642
146	26790	34792	26294	7216	22318	3237	18476	36867	45269	43345	145469	39608	13697	56083	12179	106915	26466	189850	158268	50552	84353	76251	50095	92165	50722	119546	10859	141972	86763	92917	34903	81827	78557	95285	64165	48933	56764	111128	66251	96898	55309	87723	66196	112807	76282	56386	80585	92167	109283
147	27096	35414	26595	7256	22218	3351	18732	37109	44484	43667	146989	40252	13941	57312	12171	107955	26267	193418	160018	51107	86246	77736	51043	91921	51789	120428	11095	143668	86824	94789	35242	82577	79120	96548	66439	49671	58066	110276	69243	98408	55041	90605	69480	114070	77500	57284	84247	93987	109640
148	28353	37036	27985	7235	21924	3432	19592	38281	45843	45411	152991	42254	14586	59837	12425	114466	27668	200179	168803	53661	89579	80444	52182	92107	53705	123232	11621	146221	89911	98673	36940	85477	81764	101091	70670	52682	60925	113564	74335	103226	57343	94675	73185	116920	81150	59728	88633	97179	111718
149	30615	38896	30409	7793	21455	3792	21268	41485	49402	48865	161855	44675	15802	63932	13867	124609	30272	207742	181017	57847	94651	82725	53968	91423	57011	126670	12221	148501	96456	103651	40058	91188	88162	108288	75741	56125	65325	120434	81633	108323	62393	98578	78474	119376	85355	63858	94911	100072	114809
150	33117	41677	33079	8478	21372	4217	22886	45584	54670	53428	172209	48609	17503	68650	15695	136250	33084	216399	193811	63086	98604	84249	55651	88899	60746	131120	13361	151085	104769	109245	44598	98693	96431	117184	80443	60954	71714	130763	87791	116542	68277	101531	83739	122581	88952	68787	102461	103088	117058
151	36133	45343	35613	9390	21370	4507	25168	49570	60934	59742	185538	53073	19418	73864	18102	146897	37022	223827	210348	68876	102827	84550	56889	86090	64879	135893	14492	154228	115141	116035	49365	107720	107767	126553	85206	66607	77557	143625	95767	126562	77131	104417	90007	125192	93186	75163	110248	107117	119203
152	38264	48021	38255	10287	20701	4835	26983	53355	66663	65104	196181	56489	21278	78208	20084	157988	39781	229751	223209	74491	107261	85640	58878	84333	67892	141533	15598	156402	124478	121807	55039	115448	117822	135066	89867	71993	84974	154598	102830	134845	83415	107077	94689	128574	96354	81651	117868	110096	122363
153	39337	47461	38454	10313	20594	4868	27249	53892	67095	65596	196980	56309	21501	78558	20430	157540	40387	228778	225059	74633	106107	84847	58055	78887	67675	140060	16009	152550	125895	121556	55683	117392	119060	136282	91644	73682	85812	156321	103956	135661	84645	107633	94919	126357	95905	83168	117284	109581	119906
154	38186	46902	37421	9784	20367	4902	26767	52088	64330	63746	191177	55037	20499	76733	19863	155733	39271	222502	219456	71157	102820	83630	56843	72754	65825	135932	15732	145752	122612	116764	53459	113639	114082	132092	91101	72316	83917	150969	103183	132864	80811	105239	92846	121155	92427	81828	113803	107407	114323
155	38373	47183	37530	9568	19960	5160	26953	52654	64322	63615	192040	55186	20874	77950	19537	158474	39903	223028	221417	70806	103503	85283	56830	68936	65737	134106	16166	142418	122292	117616	53135	115223	114100	134044	94208	72770	83077	151096	104564	134879	81339	106765	95984	120763	91316	83264	116211	109281	114154
156	41223	48740	39947	10263	20098	5427	29010	55835	67466	67705	202244	58598	22741	83080	20640	170197	42401	232519	234666	75269	107718	89156	60438	68060	69198	139966	17137	144680	130244	122770	55657	122082	121444	142714	100137	76858	86973	159798	112748	143708	85245	112427	103091	125800	94536	87850	126512	115794	117160
157	45149	53707	44445	11262	19643	5996	32417	61273	74618	74647	221940	65930	24870	91597	22758	190146	47208	248800	257031	83398	114968	93218	64926	69898	75569	149747	18755	151915	143820	133790	61285	135161	135228	156732	110675	84152	95703	174370	125910	159319	94492	120918	114533	134084	101392	97007	140987	125155	124902
158	50149	59190	49054	12321	19327	6666	35781	68725	83633	84312	247199	73968	27612	101297	26105	213232	52984	265959	284896	93557	124551	98624	71007	73249	83071	162187	21112	163088	160762	148054	69782	149333	151168	174615	122627	94726	108273	194848	142128	179308	105365	131325	127579	146469	110278	108524	159901	136983	135934
159	55527	65390	55176	13732	19612	7399	40024	76388	92910	94305	273051	81812	31201	112179	29188	234534	59185	284484	313708	105211	133379	102242	77061	78259	91469	174752	23349	173544	178678	162119	78963	164786	170100	192646	134629	106545	121037	215388	157652	197148	119488	140897	140742	156938	120248	120760	177657	148417	145731
160	59417	69598	59672	15083	19528	8115	43031	82455	101523	101328	293634	87869	33242	119512	32969	250356	63392	295958	334115	113642	139924	105161	80996	80779	96942	184696	24943	181656	192271	171494	88055	176957	184689	206529	143220	117098	132593	232658	171153	213450	130412	148497	150447	166169	126819	130833	190111	156204	153191
161	62096	72530	62795	15674	18923	8602	45578	87467	106424	107093	307979	92079	35169	125459	35269	261472	67033	305789	349498	118567	145157	107468	84614	84133	101173	193627	27129	187688	203346	179608	92898	185442	195501	217310	150956	124744	138949	245872	179788	224392	138608	154190	158310	173612	131273	139212	199458	164254	158748
162	66112	75829	65854	16150	18726	9079	48378	91823	111845	112862	324146	96702	37366	132691	37232	276728	71438	317724	367623	125231	151660	111755	88541	87633	105591	204984	28795	196546	214247	186749	97939	195305	205540	230439	161340	131710	147137	258984	191149	238418	145070	161991	167550	183753	138621	147507	208368	174090	164582
163	72199	83333	72376	17802	17980	10206	53123	100990	121730	122638	356707	106555	40489	146536	40176	306156	78271	347053	404125	137427	166472	121772	97038	94648	115177	227369	32175	215028	235662	203956	106673	214344	225806	254644	178931	143320	159881	283170	211760	264000	158029	177787	185661	202925	151437	161721	227142	192559	180844
164	81732	94406	83593	20051	17620	11563	60497	114320	137618	138684	407915	122196	46002	166209	44544	350323	89245	389356	457637	157453	187208	137970	110504	106383	129659	259901	36840	246938	268754	230640	119876	243885	257542	292214	205353	159105	181247	317122	246343	302710	177730	201737	214228	232163	170796	180818	259587	219044	204039
165	90317	104330	93447	22320	17403	12888	67356	127607	151377	153009	453690	136796	50357	184831	48709	388619	99377	426188	505794	175529	205975	151383	123959	116859	144739	286062	41259	273567	298997	255447	132655	269637	283875	326044	229509	175464	202598	349159	277167	338586	195247	222580	239638	256942	189226	200155	288521	242157	224033
166	94125	107314	97352	22819	17293	13553	70451	131793	157934	159702	472424	141954	52939	190892	51927	396206	103992	433683	523276	182211	211909	153057	129929	120503	149803	292264	43030	280705	311686	266207	138419	281246	297811	335863	238633	186237	212807	363284	290607	352164	204416	226910	251430	264527	194971	210212	299240	247722	228931
167	92641	106688	96926	22883	17207	13186	69622	132029	158456	161211	468443	140411	53072	189965	53302	388069	103598	417672	511211	180724	205570	145443	130623	118551	148726	281873	43956	272843	310704	265569	140121	281466	299627	330753	236521	192865	215528	364600	290137	350445	206111	219999	247506	259128	192074	214281	294627	240494	223842
168	88749	102178	93435	22224	17121	12800	69104	128884	156660	159556	456161	134565	52384	182665	54424	372270	101006	393215	486694	174039	195952	134674	127573	112776	142574	265399	43542	257417	301838	259344	139523	272090	294707	318467	228426	195484	212623	357019	282131	339368	204323	207966	239529	247826	184900	212531	284493	229131	214669
169	83979	96918	89253	21558	17145	12141	66410	124524	151647	155335	437596	126560	50431	174494	54461	350928	96986	367265	459693	167111	184941	124173	123252	107098	135965	248255	42764	241695	288136	249419	136559	261543	284050	301690	218677	195128	208202	346808	268974	325091	200934	195226	229637	234610	175514	209680	270185	215682	203196
170	78238	90911	84223	20135	16914	11679	63724	118139	144882	148974	413948	118012	47922	165658	53611	326014	91814	338434	426312	155971	171723	114354	116260	99552	127583	228773	41425	222966	273367	235468	131489	246794	270589	284373	206288	191057	198195	330161	254325	308507	194944	181781	216584	220043	164033	204297	253006	201941	190094
171	73202	84025	79117	18947	16720	11204	60520	111798	138210	141776	388965	110177	45237	154941	52205	303226	86943	311540	394717	144655	159784	104931	109483	91404	119647	210717	39748	204964	255702	222429	124487	232939	254990	264547	194898	186183	188992	312778	240080	291732	185721	168332	204762	204571	152738	196100	234626	188153	176748
172	68150	79611	74998	18002	16256	10705	58191	106743	131245	135466	369740	103141	43504	147129	50900	285379	82542	286741	367257	136581	149854	98152	104714	86258	112319	194076	39002	190659	241744	212904	119060	221438	242055	249616	186550	181797	181270	298927	228012	278991	179768	157948	195386	191610	143350	188111	221144	176353	167074
173	65162	76417	73110	17428	15910	10243	57104	103247	128865	132239	362868	99623	42165	143234	50588	273611	81140	271943	350351	131514	143989	93427	102969	81502	108380	182975	39362	181567	232295	208101	115657	214170	235674	240477	183303	180792	177084	290204	222769	273246	178241	151913	191249	185720	137885	186117	212736	169756	160055
174	63050	74309	72228	17085	15557	10143	57369	102188	127625	131877	358842	98174	41364	141495	50871	268306	80693	259066	339871	128515	140420	91033	102847	79321	106671	174430	39806	176968	227736	205574	114149	210753	231947	234820	180065	181697	176947	286018	220969	271989	177267	148447	191554	180449	135865	186304	209089	163059	156385
175	61505	73091	71289	17016	15329	10198	56969	101447	126850	131606	356554	96278	41495	140245	51902	263166	80153	247407	328478	125372	136934	87317	103961	76537	104803	167180	40256	171538	224134	205795	113572	207935	229670	229313	179276	183885	177455	281352	218882	269606	176600	144305	190220	176167	133322	184090	206162	158323	152654
176	58584	69929	69892	16519	15201	9758	55386	99101	124974	128715	348699	93875	40265	134556	51866	254750	78032	232926	311577	121279	129217	82891	102674	73022	101005	157064	39717	164336	215905	201803	111505	201244	223700	220099	172736	183816	174087	273466	214099	261738	174617	137555	186122	169316	128426	181142	200316	150057	147682
177	54632	65281	66924	15991	14937	9207	53839	95169	120763	124601	331679	88569	38835	127550	51462	240217	75456	212575	287939	114854	119788	75980	97920	67851	94779	143763	38471	152159	203319	192855	107821	190782	214750	205669	164255	179131	167105	261377	203061	247674	167851	127696	176733	158510	121513	173173	189589	139567	138406
178	50225	59526	61964	14709	15127	8574	50054	88150	113772	116962	307784	81540	36500	118262	50295	222438	70419	191630	259817	105118	108389	68757	91675	62185	88121	129326	36395	138039	187174	181341	102793	177091	200426	188328	151400	170165	157402	242420	188307	229655	159446	115714	163795	145749	112742	161268	177058	128197	127761
179	44665	53478	56427	13946	15087	7984	46040	80412	106245	109866	280983	74580	33531	108453	48973	202607	65145	169869	232215	96000	97373	61608	83486	55850	80102	115332	33602	123869	170652	166827	96480	162151	185914	169860	137380	160416	145561	223800	171024	209218	150248	103907	150676	131407	102843	149541	162377	115243	117668
180	40262	48394	52001	13011	14998	7229	42419	73700	99293	101835	255828	67962	31260	99285	46905	184599	59819	150711	207939	86410	86693	55059	75571	49925	73057	101449	31018	110751	153935	154473	90252	147211	168929	153180	125556	150657	133955	205345	154684	191912	139922	93781	137212	119620	92925	138251	147808	104027	106180
181	35980	44042	47741	11878	15087	6622	39120	67448	91054	93570	234527	61509	28712	90152	44289	167547	55548	134276	186275	78914	77078	49588	68211	45048	66231	91599	28854	99312	140615	141299	83924	134654	155103	138669	114233	140534	122997	189320	140676	175041	130219	84793	125255	107705	84894	126341	134485	94075	96604
182	32898	39947	43475	11102	14541	6043	36259	61982	84900	87378	216075	56398	26392	82912	42860	152118	51084	120574	168495	71422	69340	45108	62943	40901	60801	81906	27171	90374	128180	130337	77838	123542	143031	126807	105579	132929	114122	173963	128696	161246	121669	77389	116024	98454	77238	117606	122809	86025	88340
183	29892	36587	40236	10372	13793	5605	33875	57302	79553	81837	201425	52060	24307	76581	40468	140701	47215	109513	154094	65969	63661	42232	58243	37441	56023	74423	25828	82622	118399	121187	72942	113283	132481	115627	97784	125231	106490	162024	118631	151146	114258	71641	108480	91195	71779	110107	113439	79844	82005
184	28026	34473	38315	9694	13663	5219	32011	53972	75040	77954	190517	49021	23210	71851	39204	131864	45254	101760	142386	61304	58944	39175	54896	34636	52589	68663	24750	76779	110599	114822	68994	106564	124254	107416	92364	119931	100081	152637	111820	143289	109371	67299	102416	85821	68004	103970	107080	73981	76931
185	26813	32814	36652	9410	13084	5269	31298	51421	72508	74652	182049	46138	22546	68519	38862	126730	43391	94560	134423	57971	54883	37156	53508	32663	50243	64286	24206	72511	104602	110248	66525	100052	119201	101219	88950	117331	96594	145198	106682	137682	105935	64158	98918	81981	64508	99942	102325	69774	73410
186	25115	31404	35227	9232	13069	4991	30157	49571	70599	72442	175017	44425	21541	67172	38550	120749	42029	89191	126442	55277	52163	35476	51674	31079	48261	60517	23524	68804	99455	106455	63834	95574	114397	96061	85924	114038	92180	139543	101207	133341	102903	61416	95513	78678	62517	95749	98220	66462	70891
187	23795	29506	33836	8565	13078	4592	29278	47685	67635	69652	167780	42719	20547	62877	37917	115347	40021	83338	119515	52732	48918	33482	49841	29074	45901	56266	22724	65599	94252	102685	62578	90703	109381	90991	81760	110938	89154	134029	96816	128293	100432	58632	91549	74444	59842	91717	94235	62637	68071
188	22485	28043	32257	8490	12900	4387	28212	44900	65392	67714	160079	40940	19690	59796	37171	110186	38715	77178	111128	49767	45754	31915	47561	27688	43532	53072	21708	61651	89426	98131	60558	85768	104190	85339	77694	106748	85064	126966	89899	121495	96777	55291	87331	71244	57162	86473	89504	59394	64635
189	20615	26500	30466	7932	13041	4041	26565	42297	62155	63683	148819	37953	18721	56475	36159	103266	36795	71080	103046	46579	41887	29130	44087	25597	40922	48763	20892	57131	83620	92431	58197	79994	98510	79296	72718	102321	80324	119395	83565	115045	93029	51488	82812	65865	53494	82040	84688	54827	60702
190	19190	24263	28031	7561	13024	3726	24886	38917	58282	59762	137983	35189	17375	52113	35155	94943	34199	64508	94018	43122	38058	26786	40602	23386	37899	44638	19501	52303	77526	86124	55158	73864	90907	72945	66965	96817	75163	110831	76333	106863	87329	47671	75862	60557	49881	75792	78670	51084	56623
191	17351	22164	25876	7017	12762	3437	22950	35688	54577	55654	127338	32553	15940	48101	33588	87497	31636	58680	85471	39100	34439	24544	36911	21387	34358	40616	18030	47691	70632	79147	51797	67027	84631	67148	61436	89815	69232	103113	69496	98625	81612	43569	70300	55628	46113	69935	72049	46592	52268
192	15935	20653	23412	6486	12811	3246	20831	32598	50212	51403	115861	29691	14681	43933	32021	79712	29228	53021	78222	35696	31085	22443	33488	19451	31552	36912	16878	43241	64571	73393	47756	61262	77258	60957	56803	82794	63520	95059	62860	90053	75693	39990	64555	50414	42549	64691	66222	43051	47775
193	14620	18732	21543	6026	12189	2997	19601	30148	46493	46922	106661	26699	13646	40263	29940	72864	27006	48430	71117	32712	27988	20844	30374	17861	28951	34003	15730	39688	59519	67227	44443	56445	71263	55704	51894	77352	58515	87409	57549	84163	70716	37359	59313	46484	39189	59875	61046	39440	44124
194	13546	17352	19881	5629	11831	2584	18068	28026	43791	44099	98997	24568	12577	37575	28438	68148	24781	44576	65564	30316	25666	19287	28230	16417	27225	31349	14962	36817	54897	62801	41623	52150	65684	51602	48686	72804	54486	81481	53403	78643	66007	35185	55272	43188	36233	56004	55876	36386	41410
195	12451	16375	18924	5267	11406	2550	17353	26044	41287	41580	92809	23117	11952	35435	27309	63916	23634	41622	61642	28011	24137	18141	26519	15282	25209	29331	14225	34049	51368	58642	39293	48729	61938	48636	46142	69414	51284	76976	49215	73827	62190	33360	52303	41170	34500	52896	52725	34498	38739
196	11906	15725	17793	4985	11239	2419	16258	24839	39108	39479	88045	21667	11261	33710	26419	60753	22567	39087	57995	25952	22505	17355	25207	14317	24018	27811	13564	32489	48388	56197	37158	45853	58432	45502	44032	66560	48554	73530	46428	71060	59481	31977	50019	39120	32781	50644	50173	32427	37173
197	11135	15070	17001	4841	11082	2304	15759	23693	37636	38399	83929	20884	10674	32247	25965	58225	21664	37268	55159	25160	21139	16723	23894	13835	23001	26476	13118	31071	46111	54046	36091	43378	56261	43829	42301	64561	46680	70443	43897	68327	57905	31032	48358	37010	31520	48330	47630	31233	35590
198	10697	14556	16097	4700	11216	2190	15226	22362	36306	36369	79010	19925	10353	30838	25392	55847	20741	35056	52128	23839	20363	15798	22751	13074	22040	25362	12519	29441	43839	52132	34887	41611	53587	41712	40684	62026	44675	67089	41717	65995	56126	29675	46208	35566	30703	46550	45587	29815	34228
199	10192	13736	15744	4436	11224	2064	14445	21452	34611	35157	75501	18854	9746	29314	24863	52661	19690	33420	49683	23032	19033	15142	21760	12563	20554	23861	12151	27974	42004	49916	33694	39645	51712	39872	39201	59946	42822	64412	39105	63112	54502	28556	44608	33625	29487	44213	43263	28327	33364
200	9662	13270	14645	4258	11266	1897	13896	20331	33243	33336	70536	17704	9222	27931	23986	49765	18981	31513	46783	21645	17864	14234	20648	11830	19674	22435	11501	26813	39521	47625	32880	37214	49206	37503	36757	57139	40222	60864	36668	60084	52469	27194	42132	32038	27917	42283	41363	27139	31610
201	8879	12296	13778	4049	11351	1798	12741	18870	31695	31391	65288	16575	8519	26042	23237	47068	18010	28877	43810	20220	16730	13177	19002	11123	18129	21013	10771	24789	37256	44268	30812	34678	46457	35636	34648	53992	38191	57401	33985	56926	49533	25428	39648	29786	26542	39804	38362	25298	29560
202	8425	11471	12595	3785	11023	1614	12060	17502	29582	29471	60290	15171	8059	24501	22159	43680	16504	27054	40150	18730	15180	12406	17340	10206	17000	19640	10265	23121	34417	41442	29286	32021	42942	33296	32335	49861	35009	53700	31293	52708	46154	23837	36775	27470	24590	36641	35284	23628	27632
203	7718	10635	11622	3608	10671	1532	10940	16189	27296	27246	55569	13831	7399	22043	20495	40572	15195	25252	36858	17374	13830	11615	15994	9377	15471	18117	9545	21317	31909	38517	27368	29348	39414	30784	30397	46839	32745	49867	28647	49019	42730	22344	34062	25809	22795	34374	32963	21820	25621
204	7206	9790	10899	3409	10413	1426	10246	14715	25565	25306	51318	13009	6896	20908	19267	37103	14069	23146	34540	15826	12787	11026	14576	8605	14536	16973	8996	19760	29546	36079	25245	27173	36777	28544	27875	43497	30267	46830	26345	45240	40259	20695	31796	23623	21437	31785	30228	20355	24146
205	6635	9021	10020	3231	9969	1203	9463	13700	23996	23474	47572	11935	6655	19475	18137	34791	13106	21321	32269	14709	11645	10342	13516	8136	13419	15879	8380	18714	27115	33326	23865	25290	34021	26232	26316	40960	27913	43331	24533	42781	37670	19638	29798	22117	19820	30051	27664	19125	22630
206	6086	8616	9512	2846	9693	1243	9116	13034	22336	22109	44628	11093	5990	18392	17511	33320	12511	20282	29842	13798	11021	9906	12570	7599	12406	15178	8087	17377	25709	31666	22354	23952	32049	25040	25021	38534	26486	40845	22681	39885	35236	19055	28154	20475	18635	28302	25996	18214	21042
207	5842	8109	9106	2726	9869	1111	8541	12234	21115	20886	41793	10472	5732	17541	16887	31199	11809	18805	28620	13150	10453	9267	11848	7209	11712	14194	7538	16500	23965	29785	21294	22024	30165	23546	23764	36820	24814	38304	21328	37872	33733	18411	26722	19517	17789	26619	24958	17198	20346
208	5492	7734	8664	2578	9609	1107	8136	11722	20148	19895	39380	9872	5335	16395	16466	29593	11204	18233	27155	12370	9828	8998	11376	6867	11244	13412	7348	15687	22686	28292	20085	21116	28809	22281	22574	35077	23800	36792	19884	36669	32275	17554	25454	18386	17030	25371	23441	16319	19117
209	5244	7547	8002	2498	9894	977	7676	11011	19243	18780	36988	9426	5083	15708	15925	27887	10587	17535	25336	11716	9241	8580	10704	6564	10643	12893	7076	15020	21315	27084	19665	20235	27549	21475	21666	34134	22532	34806	18737	34898	30623	17192	24393	17599	16430	24244	22264	15704	18426
210	4970	7101	7489	2397	9959	912	7101	10347	18569	18002	34573	8832	4909	14719	15410	26249	10171	16874	24253	11153	8868	8270	9989	6288	10097	12302	6722	14616	20199	26067	18955	18793	26282	20322	20711	32209	21349	33531	17590	33155	29781	16382	23230	16825	15768	23243	21084	14999	17893
211	4668	6756	7174	2340	9818	867	6779	9819	17545	17024	32453	8403	4456	14134	14768	24870	9620	15595	22905	10402	8125	7782	9232	5913	9105	11426	6465	13670	18910	24332	17899	17342	24680	18776	19288	30221	20117	30985	16489	31132	28126	15777	21586	15295	14995	21960	19668	14314	16646
212	4351	6259	6554	2164	9765	866	6310	9123	16386	15685	29847	7746	4178	13064	13881	22898	8794	14638	21069	9740	7772	7481	8600	5589	8827	10771	6080	12803	17654	23028	16784	16376	22694	17814	18126	28482	19089	29662	15056	28854	26249	14593	20132	14653	14198	20434	18298	13120	15571
213	4014	5960	6061	2006	9434	725	5911	8519	15273	14573	27413	7092	3822	12018	13114	21175	8398	13802	19425	8983	6988	6881	7726	5146	7850	9879	5765	11791	16424	21403	15571	15066	21069	16315	16796	26489	17537	26889	13950	26572	24338	13804	18674	13174	13032	18822	16815	12421	14714
214	3726	5615	5616	1804	9200	711	5193	7879	14170	13724	25215	6506	3484	11019	12336	19576	7631	12315	17926	8185	6486	6345	7243	4806	7243	9366	5306	11094	15181	19854	14434	13597	19566	15215	15918	24765	15989	25267	12599	24912	22791	13067	17425	12287	11855	17683	15472	11318	13702
215	3512	5114	5116	1713	8965	646	5033	7103	13025	12562	23292	6010	3389	10452	11459	18255	7147	11723	16653	7404	5989	6175	6499	4411	6616	8554	4998	10290	13884	18671	13592	12684	18033	14048	14567	22601	14722	23324	11702	22973	20939	12211	16338	11279	11254	16206	14452	10736	12974
216	3215	4625	4650	1609	8505	618	4690	6702	12220	11739	21349	5505	3109	9662	10921	16960	6553	10823	15542	6915	5534	5866	6213	4139	6118	7974	4823	9513	12944	17137	12522	11804	16807	13285	13798	21084	13705	21876	10882	21701	19542	12078	15184	10621	10473	15148	13193	9904	12044
217	2997	4580	4532	1499	8171	564	4408	6346	11561	10982	20162	5206	2826	8965	10258	15912	6262	10343	14692	6470	5267	5621	5792	3956	5763	7471	4454	9009	11899	16552	11559	11133	15729	12268	12760	20060	12789	20608	9969	20042	18498	11720	14240	9838	9980	14399	12424	9344	11396
218	2877	4293	3983	1404	8393	505	4134	5744	10834	10329	18863	4782	2718	8516	9832	14987	5978	9785	13942	6168	4913	5455	5498	3609	5366	7095	4258	8546	11183	15410	11159	10334	14780	11509	12617	19139	12057	19202	9212	19454	17357	11372	13738	9330	9671	13561	11663	9095	10792
219	2757	4117	4040	1390	8426	474	3919	5653	10184	9654	17561	4521	2544	7925	9377	14124	5401	9686	13253	5882	4709	5388	5174	3544	5120	6642	4035	8233	10699	15008	10763	9659	13884	10859	11929	18022	11329	18250	8764	17975	16505	11087	12949	8829	9171	12908	11136	8757	10494
220	2754	3954	3713	1281	8469	449	3645	5180	9706	9248	16468	4338	2428	7592	9019	13419	5305	9522	12549	5449	4423	5197	4839	3509	4865	6314	3786	8162	10036	14223	10124	9147	13280	10086	11412	17347	10873	17339	8152	17317	15720	11071	12293	8254	8730	12163	10625	8525	10005
221	2410	3944	3489	1192	8676	423	3430	4911	9368	8730	15499	4134	2196	7067	8405	12613	4846	9184	12023	5085	4208	5103	4477	3544	4560	5904	3700	7810	9260	13407	9729	8521	12484	9775	10989	16183	10192	16114	7619	16337	15013	10643	11796	7721	8531	11469	10028	8057	9904
222	2334	3730	3303	1161	8383	393	3228	4580	8986	7890	14175	3718	2175	6755	8164	11756	4554	8677	11280	4665	3989	5002	4170	3333	4153	5604	3660	7514	8760	12930	8916	7995	11796	8977	10417	15465	9578	15177	7095	15422	13881	10290	11002	7277	8119	10828	9276	7746	9257
223	2148	3394	2920	1065	8404	345	2965	4271	8113	7441	13340	3445	1882	6177	7659	10971	4247	7983	10515	4359	3647	4677	3884	3145	4007	5373	3330	7217	7885	12210	8559	7178	10748	8458	9729	14249	8803	14281	6434	14133	13171	9749	10202	6843	7754	9923	8850	7189	8890
224	2050	3183	2864	960	8134	322	2793	4008	7376	6828	12204	3275	1815	5660	7194	10218	3937	7548	9777	4050	3385	4525	3545	3034	3715	4833	3266	6726	7461	11320	7671	6942	9875	7830	9024	13299	8213	13185	6108	13145	12203	9471	9304	6338	7145	9268	7848	6735	8361
225	1904	3000	2518	945	7709	312	2550	3628	6960	6276	11174	2932	1614	5296	6708	9595	3683	6960	9023	3605	3190	4392	3252	2678	3299	4516	2884	6096	6926	10424	7221	6230	9230	7247	8433	12121	7377	12072	5437	12180	11141	9105	8751	5851	6641	8566	7391	6369	7759
226	1751	2827	2331	853	7503	307	2419	3395	6611	5858	10345	2530	1584	4764	6365	8881	3407	6392	8732	3422	2948	4153	2993	2633	3101	4268	2720	5836	6225	9980	6565	5733	8276	6713	7916	11357	6950	11367	4966	11029	10426	8868	7990	5412	6201	7958	6875	5996	7421
227	1780	2700	2227	807	7446	249	2198	3197	6161	5427	9826	2510	1516	4667	5961	8382	3204	6299	8175	3124	2740	4210	2779	2388	2869	4008	2658	5550	5906	9424	6065	5363	8031	6166	7560	10576	6448	10629	4545	10610	9692	8509	7609	5179	5918	7476	6776	5438	6936
228	1656	2676	1963	758	7433	248	2143	2980	5732	5242	8958	2445	1351	4458	5686	7998	2983	6349	7769	2939	2811	4001	2614	2326	2630	3875	2479	5308	5540	8862	5787	5048	7343	5887	7285	10012	6118	10006	4415	9944	9137	8480	7137	4873	5607	7097	6428	5400	6815
229	1558	2626	1873	709	7356	235	1964	2853	5483	4880	8605	2199	1251	4114	5495	7635	2816	6356	7696	2852	2722	4068	2450	2183	2623	3730	2439	5282	5222	8696	5531	4824	6979	5657	7219	9515	5635	9331	4225	9354	8456	8318	7030	4620	5472	6586	6013	5315	6609
230	1632	2574	1808	639	7372	227	1833	2718	5336	4597	8050	2172	1235	3891	4875	7244	2749	6345	7375	2721	2593	4142	2378	2207	2534	3557	2369	5432	4895	8597	5052	4561	6584	5213	6878	9207	5397	9054	3841	9092	8001	8513	6609	4578	5427	6297	5748	5232	6693
231	1576	2508	1645	614	7420	214	1750	2622	4837	4266	7798	2106	1074	3804	4801	6923	2588	6264	7302	2593	2410	4286	2225	2278	2385	3555	2271	5329	4601	8173	4978	4412	6104	5115	6881	8663	5084	8568	3667	8494	7776	8185	6464	4287	5328	5855	5450	5140	6207
232	1499	2406	1627	618	7517	217	1702	2322	4447	3920	7163	1972	1057	3459	4437	6513	2406	6272	6834	2444	2451	4113	2168	2291	2236	3290	2144	5268	4302	7951	4579	4151	5903	4869	6721	8335	4703	8049	3457	8213	7344	8296	6046	4176	5187	5569	5140	5064	6338
233	1430	2333	1509	594	7224	180	1570	2212	4168	3765	6841	1796	1024	3360	4083	6112	2212	6012	6745	2268	2267	4045	2008	2258	2044	3198	1984	5105	4047	7492	4180	3774	5379	4559	6280	7739	4400	7560	3280	7517	6796	7994	5616	4032	5071	5123	4828	4999	6210
234	1363	2287	1410	502	7225	166	1449	2001	3931	3456	6182	1704	905	3109	3970	5807	2104	5802	6219	2083	2111	4091	1891	2245	1935	3049	1896	5059	3786	7149	3893	3716	5086	4281	5995	7039	4175	7183	3083	7150	6339	7930	5461	3728	4632	4857	4595	4672	5790
235	1323	2187	1274	494	6923	182	1287	1952	3781	3134	5726	1511	812	2838	3614	5424	2001	5480	5990	1957	2066	3998	1758	2092	1716	2874	1940	4735	3531	6933	3629	3373	4687	4033	5681	6664	3832	6666	2796	6658	5895	7770	5192	3681	4478	4577	4507	4377	5794
236	1247	2102	1133	450	6829	142	1237	1747	3433	2971	5449	1451	768	2753	3498	5107	1827	5286	5739	1816	1968	3967	1677	1962	1677	2749	1738	4631	3437	6491	3413	3146	4365	3881	5311	6299	3618	6217	2626	6280	5496	7707	4824	3451	4400	4178	4330	4147	5443
237	1185	1922	1101	422	6609	150	1141	1687	3306	2718	5098	1332	723	2539	3207	5022	1700	5231	5482	1696	1910	3778	1500	1882	1647	2544	1675	4563	3197	6328	3074	2955	4090	3582	5400	5868	3297	5855	2486	5903	5045	7572	4651	3390	4088	3932	4119	4125	5376
238	1185	1911	1020	391	6514	136	1140	1623	3051	2686	4799	1363	673	2475	2987	4997	1580	5198	5553	1655	1946	3998	1410	1797	1549	2708	1610	4407	2975	6146	2947	2809	3846	3421	5144	5598	3002	5675	2462	5625	4965	7457	4533	3178	4074	3777	4058	4089	5276
239	1230	1850	933	404	6435	150	1032	1600	2817	2558	4786	1277	716	2436	2922	4867	1595	5329	5499	1625	1858	4032	1398	1818	1540	2705	1586	4319	2910	6112	2794	2863	3754	3410	5181	5348	3110	5491	2360	5417	4736	7501	4414	3076	4013	3597	3885	4035	5211
240	1231	1886	901	388	6397	156	1082	1562	2804	2391	4759	1376	630	2347	2782	4726	1560	5501	5499	1617	1881	4039	1405	1889	1572	2711	1582	4389	2816	5926	2760	2825	3626	3327	5128	5448	2853	5359	2456	5258	4448	7495	4323	3166	4071	3570	3962	4033	5277
241	1171	1874	867	397	6593	146	975	1439	2599	2356	4435	1295	650	2322	2630	4510	1446	5652	5493	1573	1891	4113	1323	1970	1454	2684	1485	4566	2811	6002	2567	2796	3448	3254	5230	5129	2776	5289	2350	5059	4321	7534	4137	3182	4226	3412	3918	4021	5276
242	1160	1907	870	357	6341	121	927	1420	2611	2159	4328	1233	611	2235	2470	4455	1381	5911	5269	1541	1820	4147	1268	1977	1475	2732	1536	4570	2698	5977	2515	2707	3367	3234	5330	4759	2755	5232	2165	5015	3964	7468	4034	3051	4064	3281	3755	4136	5174
243	1186	1799	763	314	6433	127	847	1353	2364	2087	4357	1174	572	2149	2379	4310	1333	5673	5042	1375	1901	4226	1247	1934	1328	2547	1420	4716	2634	5770	2278	2659	3159	3055	5032	4792	2599	4886	2133	4698	3818	7516	3901	2961	4107	3107	3849	4138	5254
244	1055	1745	794	296	6335	99	830	1314	2324	1915	4050	1076	545	2018	2199	4055	1267	5509	5103	1423	1763	4155	1253	1953	1314	2450	1358	4619	2439	5811	2232	2471	3007	2982	4965	4634	2414	4635	2078	4537	3690	7343	3887	2981	4018	2930	3885	4036	5052
245	1133	1668	750	293	6053	124	870	1235	2144	1856	3871	1080	498	1958	2113	4125	1309	5444	4819	1374	1674	4261	1201	1967	1319	2488	1385	4587	2328	5539	2043	2344	2794	2839	4877	4267	2329	4346	2177	4411	3476	7410	3739	3061	3843	2784	3970	3891	4980
246	1087	1702	671	257	5875	113	806	1274	2099	1779	3780	1098	516	1906	1944	4015	1173	5372	4815	1307	1760	4331	1159	2039	1333	2582	1357	4507	2332	5560	1972	2463	2791	2801	4836	4127	2208	4352	2138	4296	3371	7306	3571	3115	3816	2708	4041	4015	4986
247	1040	1658	693	291	5795	97	787	1100	2024	1723	3721	1105	492	1898	1849	3879	1211	5592	4662	1246	1730	4358	1078	1982	1303	2475	1364	4519	2209	5431	1924	2381	2687	2767	4696	3999	2161	4239	2058	4082	3263	7178	3608	3106	3778	2572	3960	3757	4914
248	1055	1564	655	268	5559	110	762	1096	1944	1576	3546	983	418	1833	1772	3845	1165	5334	4695	1250	1703	4391	1112	1878	1282	2526	1254	4415	2204	5394	1788	2229	2616	2686	4715	3894	2054	3947	1937	3871	3000	7489	3631	3033	3717	2530	3786	3702	4901
249	1057	1614	607	248	5506	110	726	1104	1832	1549	3571	931	447	1901	1786	3770	1084	5276	4640	1218	1737	4299	1104	1907	1168	2546	1269	4553	2061	5315	1683	2192	2462	2595	4652	3829	1893	3990	1985	3787	2956	7225	3395	3065	3762	2362	3548	3807	4875
250	1011	1657	621	257	5592	114	687	1136	1755	1457	3644	1029	451	1738	1643	3659	1063	5567	4546	1199	1696	4418	1028	1915	1231	2526	1301	4618	2048	5409	1690	2187	2504	2608	4524	3691	1905	3929	1919	3716	2771	7056	3393	3057	3800	2393	3325	3911	5000
[truncated: 301 more columns]

## Sheet: Supplementary Data 9
Supplementary Data 9. Size deconvolution results of cell-free DNA from Mouliere et al STM 2018*
Size deconvolution results
Cancer type	ID	Center (bp)	Scale (bp)	Amplitude (%)
Bladder	SLX-10572.D704-D505	80.14	3.57	10.54
		90.82	3.57	8.04157
		100.9	4.44	9.17379
		111.06	4.44	8.54313
		121.31	7.11	11.8022
		131.48	7.11	7.99546
		141	8	8.84879
		150	8	6.56001
		158.82	8	6.27187
		168	8	5.34331
		178	8	5.59496
		189.31	8	4.81009
		199.85	8	3.23083
		207.08	8	2.61199
		221	8	6.5852
Bladder	SLX-10572.D708-D505	80.17	1	1.75082e-12
		91.25	1	0.00840851
		100.9	1	0.00785603
		111.09	1	0.0210414
		122.11	1	0.167369
		133.47	1	0.388846
		142.84	3.25	2.67717
		152.03	3.25	3.53746
		159.95	2.84	2.74975
		167.05	6.14	28.1501
		177.05	7.65	31.604
		188.65	7.65	18.1152
		199.75	7.65	10.1569
		210.14	7.65	5.18972
		221	7.65	3.13515
Bladder	SLX-10572.D708-D508	80.37	1	0.0273763
		91.48	1	0.0722773
		101.39	1.13	0.0955979
		110.95	1.13	0.132117
		122.04	1.15	0.307122
		133.36	1.15	0.731288
		142.57	4.07	5.67451
		151.84	4.07	7.18734
		159.15	2.74	3.91086
		166.57	5.86	42.2566
		176.31	6.64	28.5884
		187.72	6.64	10.5047
		198.79	6.64	3.89689
		208.78	6.64	1.46178
		217	6.64	0.175149
Bladder	SLX-10575.iPCRtagT014	80.52	1	0.0322553
		91.44	1	0.106277
		101.4	1.91	0.20401
		111.05	1.91	0.317512
		122.03	1.38	0.610862
		133.3	1.38	1.02288
		142.42	4.4	6.91424
		151.73	4.4	8.49752
		159.17	2.61	3.96248
		166.41	5.33	39.9545
		175.99	6.53	28.9296
		187.63	6.53	9.59473
		199.07	6.53	3.36026
		209.37	6.53	1.23587
		217.95	6.53	4.90141e-12
Bladder	SLX-11896.D707-D502	80.21	2.03	0.21087
		91.32	2.03	0.261332
		101.41	2.79	0.349277
		110.96	2.79	0.399478
		122.03	1.46	0.508058
		133.34	1.46	1.02644
		142.54	4.7	7.63395
		151.65	4.7	9.08576
		158.98	2.67	3.94423
		166.29	5.44	39.58
		175.77	6.7	28.5605
		187.58	6.7	8.57312
		199.16	6.7	3.19405
		209.78	6.7	1.19119
		217	6.7	0.0941251
Bladder	SLX-11896.D707-D507	80.07	2.68	0.737183
		91.1	2.68	0.673122
		101.19	2.88	0.671044
		111.21	2.88	0.818158
		121.95	1.65	0.926262
		133.27	1.65	1.36484
		142.51	4.22	6.81757
		151.82	4.22	7.50237
		159.13	2.54	3.27461
		166.47	5.82	41.5291
		176.14	6.47	27.1403
		187.58	6.47	8.93639
		198.95	6.47	3.20133
		210.01	6.47	1.10841
		219.24	6.47	1.93342e-09
Bladder	SLX-11896.D707-D508	80.14	2.06	0.357618
		91.22	2.06	0.399446
		101.21	2.18	0.362877
		111.2	2.18	0.466327
		122.04	1.54	0.75778
		133.33	1.54	1.32028
		142.57	4.02	6.18793
		151.97	4.02	6.89619
		159.3	2.47	3.05003
		166.53	5.94	38.4938
		176.42	6.91	28.2675
		188.05	6.91	11.1245
		199.51	6.91	4.75993
		210.2	6.91	1.89658
		220.31	6.91	0.532139
Bladder	SLX-11896.D708-D503	80.15	1.75	0.183514
		91.21	1.75	0.172431
		101.25	1.57	0.140444
		111.01	1.57	0.155458
		122.1	1.22	0.326344
		133.44	1.22	0.812455
		142.62	4.17	5.62098
		151.88	4.17	7.1807
		159.09	2.6	3.65328
		166.41	5.5	39.1467
		176.11	6.76	30.2709
		187.84	6.76	10.8071
		199.28	6.76	4.35436
		209.95	6.76	1.58855
		218.4	6.76	0.347668
Bladder	SLX-11896.D708-D504	80.28	1.32	0.141189
		91.2	1.32	0.176803
		101.29	1.87	0.228329
		111.08	1.87	0.291146
		121.98	1.39	0.532333
		133.27	1.39	0.881216
		142.53	4.43	5.67164
		151.73	4.43	7.135
		159.06	2.6	3.25037
		166.43	5.67	38.4975
		176.05	6.6	29.9617
		187.74	6.6	11.3842
		198.98	6.6	4.59661
		209.06	6.6	1.64058
		217.83	6.6	0.410132
Bladder	SLX-11896.D709-D503	80.24	1.72	0.13769
		91.27	1.72	0.15711
		101.15	1.96	0.176808
		110.65	1.96	0.148933
		122.07	1.27	0.330003
		133.41	1.27	0.9312
		142.38	4.47	7.30603
		151.68	4.47	9.05158
		158.88	2.63	4.52558
		166.16	5.37	43.5298
		175.84	6.6	26.5327
		187.7	6.6	7.76821
		199.25	6.6	2.8069
		209.44	6.6	1.00868
		217	6.6	0.0686716
Bladder	SLX-11896.D709-D506	80.09	2.02	0.317927
		91.1	2.02	0.342817
		101.29	2.31	0.343182
		111.12	2.31	0.409359
		121.96	1.49	0.549704
		133.34	1.49	1.01088
		142.63	4.16	5.58712
		151.92	4.16	6.76048
		159.23	2.4	2.92504
		166.6	6.04	40.0235
		176.42	6.77	28.3865
		187.89	6.77	11.5049
		199.31	6.77	4.71444
		209.69	6.77	1.69862
		217.34	6.77	0.399775
Bladder	SLX-11904.D708-D504	80.44	1	0.0359033
		91.42	1	0.113853
		101.32	1.67	0.18974
		111.28	1.67	0.35488
		122.05	1.49	0.837145
		133.3	1.49	1.29572
		142.58	4.57	8.2495
		151.66	4.57	8.95151
		159.09	2.6	3.67174
		166.41	5.49	39.6282
		175.98	6.4	27.798
		187.43	6.4	9.37146
		198.38	6.4	3.24863
		208.28	6.4	0.98527
		217	6.4	1.89391e-09
Bladder	SLX-11904.D709-D501	80.24	1	0.0096061
		91.45	1	0.0572689
		101.45	1.23	0.0919835
		110.87	1.23	0.13632
		122.07	1.22	0.369307
		133.42	1.22	0.97681
		142.36	4.44	7.95406
		151.64	4.44	9.24937
		159.08	2.67	4.75877
		166.33	5.2	41.9064
		175.89	6.48	27.4723
		187.72	6.48	8.31042
		199.13	6.48	2.66801
		209.25	6.48	0.739829
		217.07	6.48	3.85696e-11
Glioblastoma	SLX-11868.D710-D505	81.04	7.64	5.85132e-12
		90.71	7.64	7.3761e-12
		101.34	1	0.0411891
		111.18	1	0.0885144
		122.17	1.26	0.448228
		133.39	1.26	0.988142
		142.44	4.16	6.53196
		151.78	4.16	7.89174
		159.17	2.6	4.18486
		166.35	5.2	38.7222
		175.91	6.67	30.0187
		187.74	6.67	10.0423
		199.37	6.67	4.04871
		209.88	6.67	1.47459
		217.73	6.67	0.263158
Glioblastoma	SLX-11868.D710-D506	80.22	1.89	9.03011e-12
		89.15	1.89	4.8217e-12
		101.39	1	0.0174772
		111.16	1	0.0453827
		122.16	1.02	0.276755
		133.46	1.02	0.635483
		142.6	4.11	6.78154
		151.66	4.11	8.04707
		159.04	2.57	4.17107
		166.37	5.21	44.7064
		175.69	6.17	28.9882
		187.38	6.17	7.63619
		199.2	6.17	2.6492
		209.16	6.17	0.86611
		220.85	6.17	1.79856e-13
Glioblastoma	SLX-11868.D710-D507	80.38	1.28	0.137063
		91.32	1.28	0.280991
		101.22	2.28	0.457335
		111.28	2.28	0.755387
		121.96	1.78	1.18264
		133.21	1.78	1.58077
		142.71	4.57	7.4283
		151.85	4.57	8.29124
		159.39	2.46	2.83908
		166.63	6.06	37.5708
		176.22	6.83	27.6907
		187.68	6.83	10.1254
		199.16	6.83	4.13932
		209.93	6.83	1.74061
		220.42	6.83	0.573158
Glioblastoma	SLX-11868.D710-D508	80.11	1.82	0.115541
		91.4	1.82	0.0930092
		101.33	1.34	0.0711215
		110.79	1.34	0.0746128
		122.05	1.05	0.223398
		133.4	1.05	0.590008
		142.4	4.44	6.32494
		151.67	4.44	8.73788
		158.87	2.66	4.66718
		166.21	4.92	44.5881
		175.39	6.38	30.2948
		187.29	6.38	6.55387
		199.05	6.38	1.78221
		208.36	6.38	0.37628
		219.48	6.38	2.71767e-11
Glioblastoma	SLX-11868.D711-D505	78.61	1	4.25215e-13
		91.49	1	0.0785973
		102.08	2.4	0.279335
		111.04	2.4	0.359337
		122.05	1.49	0.540631
		133.23	1.49	1.24435
		142.34	4.92	12.0133
		151.69	4.92	13.4472
		158.81	3.18	7.55111
		165.69	5.15	48.1999
		174.9	6.49	16.826
		187.17	6.49	3.01505
		199.95	6.49	0.977163
		208.07	6.49	5.65992e-12
		217.52	6.49	1.29501e-10
Glioblastoma	SLX-11868.D711-D506	80.38	1	0.0111101
		91.47	1	0.0443536
		101.33	1.39	0.0911561
		110.68	1.39	0.0941082
		122.01	1.23	0.267747
		133.3	1.23	0.912013
		142.26	4.35	8.30164
		151.8	4.35	10.8678
		159	2.96	6.54464
		165.95	4.91	44.8502
		174.99	6.96	24.1939
		187.8	6.96	5.43711
		199.92	6.96	2.22893
		209.53	6.96	0.662416
		217.41	6.96	5.24419e-10
Glioblastoma	SLX-11868.D711-D507	80.04	2.01	1.23198e-10
		91.84	2.01	7.79687e-12
		100.96	1.67	8.68861e-13
		112.32	1.67	4.32987e-13
		122.16	1	0.245511
		133.46	1	0.568436
		142.77	3.59	4.53554
		152.03	3.59	5.73555
		159.63	2.37	2.735
		166.74	6.04	37.9348
		176.64	7.22	30.3279
		188.43	7.22	12.8506
		199.89	7.22	6.51539
		210.52	7.22	2.8443
		221	7.22	1.1989
Glioblastoma	SLX-11868.D711-D508	80.27	1	0.00570677
		91.47	1	0.015547
		101.16	1	0.0189886
		110.67	1	0.0133927
		122.07	1	0.141481
		133.43	1	0.574363
		142.41	4.1	6.24267
		151.79	4.1	8.32968
		159.09	2.67	4.72905
		166.13	5.11	43.6969
		175.41	6.97	29.0616
		187.92	6.97	7.4085
		199.9	6.97	3.08126
		210.55	6.97	1.19821
		219.1	6.97	0.239882
Glioblastoma	SLX-11868.D712-D505	80.94	6.08	4.47247e-11
		91.81	6.08	3.55338e-12
		101.4	1	0.0505582
		111.04	1	0.098476
		122.11	1.17	0.399958
		133.39	1.17	0.865802
		142.54	3.96	6.14765
		151.95	3.96	7.2736
		159.44	2.46	3.38002
		166.43	5.76	39.0888
		176.37	7.11	28.388
		188.39	7.11	11.412
		199.77	7.11	5.09752
		210.42	7.11	2.30994
		220.7	7.11	0.670969
Glioblastoma	SLX-11868.D712-D506	80.64	3.16	1.2772e-10
		91.28	3.16	2.25819e-13
		101.17	1.01	6.03739e-13
		111.11	1.01	2.66454e-15
		122.15	1	0.132883
		133.47	1	0.532816
		142.79	4.1	5.29482
		151.84	4.1	7.39846
		159.2	2.64	3.9334
		166.57	5.49	42.6484
		175.89	6.42	31.2589
		187.34	6.42	9.49052
		198.84	6.42	3.35668
		209.38	6.42	1.15465
		217.01	6.42	5.42277e-12
Glioblastoma	SLX-11868.D712-D507	80.34	1	0.0346158
		91.39	1	0.10462
		101.29	1.53	0.157757
		111.2	1.53	0.256442
		122.02	1.31	0.55397
		133.37	1.31	0.952946
		142.62	4.3	7.0931
		151.77	4.3	8.13547
		159.2	2.58	3.76182
		166.53	5.68	41.4928
		176.15	6.58	27.7212
		187.67	6.58	9.44493
		199.32	6.58	3.6048
		209.88	6.58	1.36624
		217	6.58	0.122046
Glioblastoma	SLX-11868.D712-D508	80.07	1.07	3.31513e-13
		91.08	1.07	6.01741e-13
		100.65	1.26	2.84262e-12
		110.31	1.26	1.46873e-10
		122.07	1	0.0454404
		133.5	1	0.423456
		142.71	3.74	4.50877
		151.76	3.74	6.29021
		159.24	2.56	4.0535
		166.67	5.39	43.1765
		176.23	6.2	31.49
		187.49	6.2	10.8134
		198.78	6.2	3.56315
		209.19	6.2	1.07157
		217.15	6.2	3.51674e-12
Glioblastoma	SLX-12839.D701-D501	79.78	3.01	0.467504
		91.16	3.01	0.378324
		101.41	2.32	0.288933
		110.92	2.32	0.358781
		122.07	1.53	0.668447
		133.34	1.53	1.30343
		142.42	4.19	6.85739
		151.84	4.19	7.87334
		159.21	2.79	4.73072
		166.31	5.08	37.5123
		175.7	6.82	30.8608
		187.57	6.82	9.11815
		199.29	6.82	3.29931
		209.89	6.82	1.03813
		217.39	6.82	3.888e-12
Glioblastoma	SLX-12839.D701-D502	79.97	2.6	1.56541
		91.09	2.6	1.66672
		101.22	3.17	1.78815
		111.33	3.17	2.38976
		121.88	2.32	2.69698
		133.08	2.32	2.94297
		142.63	4.63	9.11559
		151.88	4.63	9.02477
		159.44	2.53	2.92523
		166.51	6.15	36.1851
		176.01	6.73	23.7817
		187.24	6.73	7.37043
		198.58	6.73	2.61418
		209.02	6.73	0.842085
		217.17	6.73	2.80275e-10
Glioblastoma	SLX-12839.D701-D503	79.28	3.59	0.296312
		91.26	3.59	0.224494
		101.24	1.97	0.13047
		110.52	1.97	0.102298
		122.13	1.12	0.205941
		133.4	1.12	0.68014
		142.43	4.23	6.37414
		151.82	4.23	8.72541
		159.06	2.68	4.82663
		166.15	5.21	46.4537
		175.34	6.66	27.0809
		187.57	6.66	6.42067
		199.5	6.66	2.34496
		209.97	6.66	0.764017
		217.44	6.66	7.0953e-11
Glioblastoma	SLX-12839.D701-D504	80.08	1.71	0.19117
		91.12	1.71	0.215206
		100.97	1.87	0.244671
		111.07	1.87	0.322424
		122.01	1.35	0.573651
		133.34	1.35	1.08392
		142.53	4.12	6.51018
		151.98	4.12	7.74238
		159.35	2.34	3.09256
		166.35	5.85	40.9396
		176.28	7.13	28.3293
		188.23	7.13	10.1251
		199.81	7.13	4.05151
		210.8	7.13	1.54291
		217	7.13	0.105011
Glioblastoma	SLX-12839.D702-D501	79.88	2.19	0.208038
		91.11	2.19	0.1364
		101.23	1.51	0.10857
		110.82	1.51	0.12477
		122.1	1.22	0.264595
		133.42	1.22	0.699986
		142.78	4.2	5.46498
		151.93	4.2	7.476
		159.23	2.65	3.91947
		166.55	5.54	43.279
		175.82	6.44	30.9979
		187.24	6.44	8.69736
		198.73	6.44	2.71033
		207.99	6.44	0.781677
		220.41	6.44	4.62874e-12
Glioblastoma	SLX-12839.D702-D502	79.91	2.33	0.608502
		91.19	2.33	0.57056
		101.25	2.65	0.570671
		111.14	2.65	0.733076
		121.96	1.64	0.91239
		133.28	1.64	1.36926
		142.53	4.34	7.63617
		151.78	4.34	8.44127
		159.16	2.79	4.24911
		166.54	5.68	41.586
		176.08	6.45	26.1484
		187.44	6.45	8.13966
		198.83	6.45	2.84411
		209	6.45	0.935717
		217.23	6.45	9.69321e-10
Glioblastoma	SLX-12839.D702-D503	79.61	3.19	0.539731
		91.35	3.19	0.41331
		101.44	2.51	0.344578
		110.65	2.51	0.290905
		122.03	1.36	0.451719
		133.33	1.36	1.2667
		142.37	4.15	8.21446
		151.87	4.15	9.83214
		159.15	2.67	5.10342
		166.14	5.37	47.8391
		175.43	6.8	23.2898
		187.76	6.8	5.14207
		199.95	6.8	1.68715
		208.59	6.8	0.317771
		217.02	6.8	1.53655e-12
Glioblastoma	SLX-12839.D702-D504	79.75	3.08	0.473045
		91.25	3.08	0.376555
		101.4	2.41	0.305701
		110.72	2.41	0.287486
		122.03	1.35	0.441343
		133.36	1.35	1.25325
		142.37	4.12	8.15556
		151.85	4.12	9.68293
		159.16	2.72	4.95156
		166.17	5.49	49.774
		175.61	6.49	21.7865
		187.69	6.49	4.99998
		199.89	6.49	1.78157
		208.64	6.49	0.398369
		217.37	6.49	3.78356e-10
Glioblastoma	SLX-12839.D703-D505	80.08	1.65	0.138222
		91.34	1.65	0.13103
		101.28	1.32	0.0996132
		110.85	1.32	0.0956839
		122.07	1.3	0.359752
		133.35	1.3	1.12855
		142.3	4.16	7.92462
		151.8	4.16	9.4181
		159.06	2.73	5.80722
		166.15	4.98	44.7898
		175.52	6.39	26.1846
		187.62	6.39	6.18117
		199.41	6.39	1.91171
		208.12	6.39	0.368489
		217.02	6.39	3.58223e-10
Glioblastoma	SLX-12839.D703-D506	80.12	1.8	0.167477
		91.23	1.8	0.15153
		101.3	1.55	0.130249
		110.88	1.55	0.129233
		122.09	1.31	0.377793
		133.37	1.31	1.13151
		142.27	4.16	7.91475
		151.73	4.16	9.43687
		159.02	2.68	5.4286
		166.19	5.17	47.2196
		175.74	6.23	24.1257
		187.55	6.23	5.89574
		199.59	6.23	1.95277
		208.6	6.23	0.426624
		217	6.23	5.34591e-10
Glioblastoma	SLX-12839.D703-D507	80.28	1.14	0.0948409
		91.31	1.14	0.102697
		101.21	1.34	0.11775
		111.25	1.34	0.197752
		122.19	1.46	0.58822
		133.41	1.46	1.15656
		142.68	4.11	5.96621
		151.9	4.11	7.14491
		159.31	2.5	3.24491
		166.63	5.95	41.5695
		176.55	6.7	27.1986
		188	6.7	10.7322
		199.62	6.7	4.76771
		210.13	6.7	1.79824
		218.07	6.7	0.277852
Glioblastoma	SLX-12839.D703-D508	80.22	1.25	0.0766898
		91.28	1.25	0.0430941
		100.43	1	0.012505
		110.58	1	5.42677e-13
		122.17	1	0.0623923
		133.51	1	0.412631
		142.83	3.8	3.80515
		151.92	3.8	5.82602
		159.34	2.45	3.4235
		166.76	5.68	41.7343
		176.42	6.43	31.1531
		187.72	6.43	12.1698
		199.09	6.43	4.75263
		209.98	6.43	1.57649
		217	6.43	0.0699677
Glioblastoma	SLX-12839.D704-D505	80.33	1.05	0.048228
		91.59	1.05	0.0658055
		100.69	1.13	0.0602715
		110.99	1.13	0.0680516
		122.04	1.2	0.304186
		133.4	1.2	0.890683
		142.34	3.94	6.55465
		151.87	3.94	8.63666
		159.15	2.62	4.9214
		166.21	5.22	43.4817
		175.61	6.8	29.5689
		187.54	6.8	7.59976
		199.46	6.8	2.31445
		207.31	6.8	0.37025
		217	6.8	1.98624e-08
Glioblastoma	SLX-12839.D704-D506	80.31	1.37	0.0722087
		91.33	1.37	0.0880832
		100.9	1.44	0.0981341
		110.84	1.44	0.0877164
		122.08	1.2	0.319086
		133.4	1.2	0.918138
		142.35	4	6.7318
		151.92	4	8.69555
		159.19	2.62	4.83711
		166.21	5.25	43.5177
		175.59	6.78	29.0833
		187.53	6.78	7.5936
		199.36	6.78	2.35386
		208.36	6.78	0.438912
		220.99	6.78	3.70979e-10
Glioblastoma	SLX-12839.D704-D507	79.96	1	1.86406e-12
		91.08	1	0.0175902
		100.97	1	2.83329e-13
		111.03	1	3.33111e-12
		121.98	1	0.107025
		133.42	1	0.320042
		142.8	3.72	3.28271
		151.8	3.72	4.54618
		159.26	2.62	3.12788
		166.79	5.59	36.2598
		176.49	6.67	32.9983
		187.91	6.67	14.8691
		199.23	6.67	6.45506
		209.84	6.67	2.5547
		219.28	6.67	0.736834
Glioblastoma	SLX-12839.D704-D508	80.36	1.03	6.56699e-11
		89.1	1.03	4.09095e-12
		102.25	1.29	2.2784e-12
		109	1.29	1.11178e-12
		122.09	1	2.97562e-12
		133.52	1	0.283508
		142.87	3.52	3.32727
		151.82	3.52	5.11604
		159.17	2.52	3.90406
		166.69	5.26	41.882
		176.16	6.23	34.2602
		187.33	6.23	11.8053
		198.69	6.23	3.97264
		209.14	6.23	1.14479
		217.25	6.23	2.21156e-13
Glioblastoma	SLX-12839.D705-D501	80.33	1.16	0.0699259
		91.3	1.16	0.0588356
		101.54	1	0.0417669
		111.14	1	0.0562424
		122.17	1.04	0.192183
		133.48	1.04	0.584293
		142.67	3.68	4.32071
		151.96	3.68	5.70548
		159.46	2.4	3.07381
		166.8	5.91	42.7305
		176.56	6.45	30.4857
		187.82	6.45	11.8044
		199.19	6.45	4.28233
		209.72	6.45	1.48117
		217	6.45	0.105071
Glioblastoma	SLX-12839.D705-D502	78.12	6.81	7.44493e-12
		91.09	6.81	2.87118e-08
		101.44	1	0.0411858
		111.32	1	0.0929745
		122.22	1.45	0.516898
		133.37	1.45	1.25074
		142.81	4.08	7.11771
		152.11	4.08	8.14533
		159.47	2.78	3.85938
		166.48	5.98	40.92
		176.03	7.07	29.1646
		187.63	7.07	9.02375
		199.13	7.07	3.59484
		210.22	7.07	1.33698
		217	7.07	7.57461e-12
Glioblastoma	SLX-12839.D705-D503	79.88	1	6.95444e-13
		91.39	1	4.62963e-13
		101.19	3.3	6.98597e-12
		109.79	3.3	8.19034e-12
		122.31	1.01	0.130002
		133.49	1.01	0.442035
		143.05	3.78	3.36637
		151.96	3.78	4.83787
		159.96	2.72	3.11863
		167.25	6.09	33.8536
		176.93	6.69	32.7202
		187.99	6.69	16.3681
		198.94	6.69	7.21097
		209.61	6.69	2.84378
		219.07	6.69	0.64612
Glioblastoma	SLX-12839.D706-D501	80.6	3.89	2.70517e-12
		90.89	3.89	3.96572e-13
		100.15	7.47	1.03406e-12
		109.48	7.47	7.70051e-13
		121.99	1	0.044953
		133.52	1	0.279152
		142.96	3.05	2.50176
		152.1	3.05	3.99199
		159.75	2.52	3.09794
		167.13	6.02	39.1047
		176.99	6.71	32.1773
		188.16	6.71	15.0172
		199.3	6.71	6.28513
		209.67	6.71	2.47058
		218.43	6.71	0.659674
Glioblastoma	SLX-12839.D706-D502	80.28	1.6	0.108465
		91.1	1.6	0.13232
		100.88	1.66	0.113072
		111.24	1.66	0.173323
		122	1.26	0.315452
		133.39	1.26	0.525615
		143.04	3.79	3.11045
		152.01	3.79	4.4567
		159.75	2.19	1.97665
		167.08	6.23	34.4509
		176.9	6.74	31.8912
		188.12	6.74	16.3811
		199.13	6.74	7.53393
		209.75	6.74	3.1
		220.08	6.74	0.960967
Glioblastoma	SLX-12839.D706-D503	80.15	1	0.00681347
		91.24	1	0.0151855
		101.37	1	0.00974451
		111.08	1	0.0286694
		122.16	1.09	0.245327
		133.46	1.09	0.703335
		142.63	3.87	5.14187
		151.91	3.87	6.68719
		159.21	2.61	4.04158
		166.46	5.41	41.3169
		176.1	6.74	30.3574
		187.83	6.74	10.6224
		199.39	6.74	4.13325
		209.61	6.74	1.50316
		217	6.74	0.245082
Healthy	SLX-12531.D703-D501	80.53	1.13	0.112951
		91.45	1.13	0.289151
		101.61	2.64	0.673159
		111.24	2.64	1.06002
		121.99	1.81	1.4535
		133.14	1.81	2.13993
		142.35	4.59	10.4089
		151.6	4.59	9.86191
		159.35	2.79	4.15269
		166.52	6.05	38.5384
		176.38	6.75	23.2315
		187.82	6.75	8.32614
		199.21	6.75	3.28144
		210.15	6.75	1.13649
		217.24	6.75	0.0275311
Healthy	SLX-12531.D703-D502	80.07	1.09	0.0785886
		91.29	1.09	0.143633
		101.21	2.11	0.267484
		111.05	2.11	0.405579
		122.06	1.41	0.688641
		133.3	1.41	1.08427
		142.63	4.17	6.57931
		151.83	4.17	7.79579
		159.36	2.49	3.40489
		166.54	5.69	39.656
		176.13	6.75	29.4253
		187.68	6.75	9.93417
		199.44	6.75	3.87435
		210.24	6.75	1.36864
		217	6.75	0.126639
Healthy	SLX-12531.D703-D503	80.63	1	0.106098
		91.46	1	0.270299
		101.62	2.83	0.755016
		111.12	2.83	1.20734
		122.03	1.77	1.26342
		133.07	1.77	1.80193
		142.08	4.82	9.757
		151.31	4.82	10.3742
		159.17	2.87	4.67282
		166.62	5.98	40.5338
		176.27	6.25	23.1754
		187.31	6.25	7.77396
		198.51	6.25	2.36775
		208.26	6.25	0.593884
		218.96	6.25	1.64735e-10
Healthy	SLX-12531.D703-D504	80.42	1.27	0.131708
		91.34	1.27	0.249681
		101.36	2.12	0.374693
		111.18	2.12	0.533761
		122	1.48	0.846281
		133.32	1.48	1.31911
		142.62	4.1	7.38334
		151.98	4.1	8.01337
		159.38	2.59	3.66647
		166.66	6.09	44.8091
		176.38	6.56	25.0345
		187.88	6.56	8.2597
		199.2	6.56	3.05241
		209.9	6.56	1.08925
		217.81	6.56	1.75166e-09
Healthy	SLX-12531.D704-D501	80.34	1.26	0.128858
		91.36	1.26	0.248777
		101.31	2.06	0.371661
		111.21	2.06	0.545485
		122	1.5	0.86992
		133.29	1.5	1.35817
		142.6	4.09	7.37587
		151.96	4.09	7.99438
		159.36	2.57	3.7234
		166.62	6.03	44.0599
		176.28	6.68	25.7
		187.87	6.68	8.24314
		199.11	6.68	3.10006
		209.78	6.68	1.06548
		218.76	6.68	2.70635e-08
Healthy	SLX-12531.D704-D502	80.39	1.24	0.125463
		91.38	1.24	0.241688
		101.3	2	0.369618
		111.18	2	0.535145
		121.99	1.5	0.860352
		133.3	1.5	1.35392
		142.61	4.08	7.42616
		151.96	4.08	7.97633
		159.39	2.55	3.70751
		166.63	6.04	44.2408
		176.31	6.62	25.4743
		187.84	6.62	8.34761
		199.29	6.62	3.04151
		209.92	6.62	1.06226
		219.4	6.62	9.8278e-08
Healthy	SLX-12531.D704-D503	80.26	1	0.0173527
		91.36	1	0.057836
		101.32	1.18	0.077714
		111.18	1.18	0.137829
		121.98	1.19	0.352878
		133.38	1.19	0.672146
		142.71	4.07	5.16703
		151.8	4.07	6.4437
		159.32	2.71	3.60041
		166.62	5.71	36.5849
		176.23	6.97	31.7412
		187.87	6.97	12.209
		199.28	6.97	5.25506
		209.81	6.97	2.12641
		219.71	6.97	0.636344
Healthy	SLX-12531.D704-D504	80.24	1	0.0253277
		91.38	1	0.0671128
		101.23	1.25	0.0886011
		111.15	1.25	0.151566
		122.01	1.2	0.355382
		133.36	1.2	0.675937
		142.7	4.11	5.19812
		151.81	4.11	6.43292
		159.36	2.71	3.55403
		166.65	5.78	37.1738
		176.26	6.88	31.1515
		187.86	6.88	12.0977
		199.27	6.88	5.25253
		209.75	6.88	2.13639
		219.97	6.88	0.670819
Healthy	SLX-12531.D705-D505	80.4	1	0.0323254
		91.43	1	0.0938198
		101.42	1.76	0.181983
		111.05	1.76	0.29645
		122	1.34	0.478424
		133.29	1.34	0.815336
		142.48	4.34	5.79335
		151.6	4.34	7.13351
		159.27	2.64	3.46231
		166.65	5.97	38.6297
		176.35	6.88	29.593
		187.79	6.88	11.3386
		199.08	6.88	4.75458
		209.77	6.88	1.88651
		219.96	6.88	0.510636
Healthy	SLX-12531.D705-D506	80.56	1	0.0165505
		91.43	1	0.0737054
		101.49	1.64	0.152894
		111.12	1.64	0.251388
		122.02	1.31	0.429363
		133.3	1.31	0.781509
		142.47	4.31	5.64225
		151.61	4.31	7.10135
		159.29	2.68	3.66788
		166.65	5.83	37.5259
		176.3	6.93	30.517
		187.87	6.93	11.572
		199.18	6.93	4.81523
		209.8	6.93	1.90576
		219.94	6.93	0.542482
Healthy	SLX-12531.D705-D507	80.53	1	0.0448185
		91.44	1	0.111117
		101.46	1.93	0.240077
		111.06	1.93	0.365236
		122	1.38	0.527217
		133.25	1.38	0.865414
		142.4	4.35	5.98213
		151.61	4.35	7.28089
		159.23	2.6	3.46466
		166.62	6	38.7491
		176.32	6.85	29.3202
		187.84	6.85	11.2139
		199.19	6.85	4.54961
		209.79	6.85	1.75668
		219.72	6.85	0.494794
Healthy	SLX-12531.D705-D508	80.5	1	0.0227685
		91.41	1	0.0801713
		101.44	1.72	0.164065
		111.02	1.72	0.287439
		122.01	1.31	0.4601
		133.26	1.31	0.806886
		142.47	4.29	5.72492
		151.58	4.29	7.04412
		159.22	2.51	3.18826
		166.61	6.07	39.4346
		176.35	6.91	29.5965
		187.84	6.91	11.3476
		199.28	6.91	4.63916
		209.82	6.91	1.79326
		219.87	6.91	0.464519
Healthy	SLX-12531.D706-D505	80.43	1.38	0.182181
		91.38	1.38	0.27715
		101.54	2.58	0.541307
		111.18	2.58	0.806959
		122.01	1.7	1.04922
		133.19	1.7	1.60647
		142.41	4.61	8.42126
		151.68	4.61	8.95338
		159.23	2.58	3.65432
		166.55	6.05	40.5054
		176.29	6.65	25.4403
		187.59	6.65	8.87837
		198.98	6.65	3.24707
		209.69	6.65	1.08818
		217	6.65	0.0913327
Healthy	SLX-12531.D706-D506	80.48	1.09	0.101361
		91.4	1.09	0.175561
		101.57	2.29	0.362945
		111.21	2.29	0.568215
		122.05	1.58	0.855035
		133.23	1.58	1.36489
		142.39	4.59	7.92137
		151.65	4.59	8.63201
		159.21	2.58	3.4668
		166.55	6.08	41.141
		176.31	6.69	26.3252
		187.72	6.69	9.26849
		199.11	6.69	3.31772
		209.71	6.69	1.23493
		217.67	6.69	0.0799065
Healthy	SLX-12531.D706-D507	80.41	1.53	0.252381
		91.36	1.53	0.359561
		101.52	2.75	0.65358
		111.18	2.75	0.91766
		122	1.73	1.14197
		133.17	1.73	1.69623
		142.37	4.61	8.63219
		151.66	4.61	9.0691
		159.2	2.64	3.72534
		166.53	6.01	40.0847
		176.28	6.63	25.2644
		187.69	6.63	8.67306
		199.02	6.63	3.1114
		210.1	6.63	1.11824
		220.74	6.63	3.46147e-09
Healthy	SLX-12531.D706-D508	80.35	1.25	0.135425
		91.41	1.25	0.228107
		101.6	2.45	0.430771
		111.17	2.45	0.65426
		122	1.66	0.923447
		133.21	1.66	1.47531
		142.41	4.58	8.08308
		151.63	4.58	8.76578
		159.23	2.74	3.91974
		166.56	5.99	39.875
		176.26	6.75	26.6941
		187.78	6.75	9.11939
		199.39	6.75	3.26464
		209.87	6.75	1.10509
		217	6.75	0.104213
Healthy	SLX-12531.D707-D501	80.49	1	0.0971938
		91.37	1	0.152742
		101.34	1.94	0.286364
		111.02	1.94	0.349409
		121.95	1.39	0.518313
		133.21	1.39	1.00488
		142.41	4.37	7.62076
		151.7	4.37	8.96425
		159.06	2.75	4.77485
		166.3	5.68	46.6442
		175.79	6.65	25.2115
		187.56	6.65	6.52125
		199.28	6.65	2.10135
		207.83	6.65	0.570999
		217.66	6.65	6.53833e-12
Healthy	SLX-12531.D707-D502	80.46	1	0.099543
		91.39	1	0.150203
		101.35	1.97	0.281947
		110.99	1.97	0.334862
		121.95	1.38	0.511108
		133.24	1.38	0.97594
		142.39	4.37	7.48232
		151.67	4.37	8.93113
		159.08	2.78	4.92268
		166.31	5.62	45.9992
		175.74	6.73	25.8471
		187.51	6.73	6.56323
		199.29	6.73	2.22352
		208.08	6.73	0.500699
		217.11	6.73	7.22847e-09
Healthy	SLX-12531.D707-D503	80.44	1	0.0967793
		91.37	1	0.148521
		101.49	1.93	0.275626
		110.97	1.93	0.332067
		121.94	1.38	0.505287
		133.23	1.38	0.9981
		142.44	4.39	7.59267
		151.77	4.39	8.98736
		159.05	2.67	4.46617
		166.3	5.73	47.3453
		175.79	6.6	24.8309
		187.48	6.6	6.53818
		199.22	6.6	2.19772
		208.23	6.6	0.520075
		219.06	6.6	2.49545e-10
Healthy	SLX-12531.D707-D504	80.46	1	0.0997803
		91.41	1	0.151965
		101.37	2.01	0.298474
		110.97	2.01	0.346387
		121.95	1.38	0.494913
		133.21	1.38	0.980054
		142.4	4.34	7.36418
		151.66	4.34	8.83496
		159.09	2.77	4.74346
		166.3	5.69	46.4773
		175.76	6.7	25.6947
		187.53	6.7	6.64732
		199.25	6.7	2.15297
		207.93	6.7	0.557184
		217	6.7	1.38065e-10
Healthy	SLX-12531.D708-D501	80.24	2.1	6.05802e-11
		91.31	2.1	3.80584e-13
		101.29	1	0.0211493
		111.17	1	0.0702854
		121.9	1.16	0.282299
		133.37	1.16	0.618591
		142.73	4.14	5.21966
		151.7	4.14	6.40458
		159.19	2.65	3.32932
		166.59	5.93	39.3733
		176.18	6.86	31.4713
		187.69	6.86	11.5405
		199.02	6.86	4.69277
		209.59	6.86	1.77391
		218.66	6.86	0.432869
Healthy	SLX-12531.D708-D502	80.59	3.83	1.63114e-12
		91.92	3.83	3.39995e-12
		100.91	1	4.15223e-14
		111.22	1	0.0317752
		121.95	1.03	0.208386
		133.41	1.03	0.531916
		142.8	4.1	4.9058
		151.8	4.1	6.13034
		159.22	2.68	3.31242
		166.64	5.91	39.2686
		176.19	6.81	31.7813
		187.69	6.81	11.9251
		199.07	6.81	4.91687
		209.7	6.81	1.89591
		219.19	6.81	0.436491
Healthy	SLX-12531.D708-D503	80.35	1	0.0250572
		91.33	1	0.0662231
		101.39	1.21	0.081412
		111.15	1.21	0.138021
		121.98	1.17	0.341753
		133.35	1.17	0.654933
		142.64	4.09	5.10961
		151.76	4.09	6.43822
		159.28	2.61	3.34845
		166.62	5.83	37.4115
		176.24	6.99	31.4407
		187.93	6.99	12.1749
		199.29	6.99	5.14271
		209.68	6.99	2.11521
		219.8	6.99	0.632518
Healthy	SLX-12531.D708-D504	80.29	1	0.0435103
		91.31	1	0.0820875
		101.31	1.32	0.10356
		111.08	1.32	0.171353
		121.96	1.23	0.375677
		133.35	1.23	0.682687
		142.65	4.09	5.16784
		151.7	4.09	6.44216
		159.31	2.67	3.53075
		166.65	5.86	37.5669
		176.28	7.02	31.2214
		187.91	7.02	11.9726
		199.38	7.02	5.15877
		209.98	7.02	2.01152
		219.81	7.02	0.575058
Healthy	SLX-12534.D707-D502	80.46	1.21	0.148264
		91.37	1.21	0.23697
		101.41	2.39	0.456193
		111	2.39	0.542566
		121.91	1.5	0.664134
		133.17	1.5	1.19502
		142.36	4.46	8.16922
		151.66	4.46	9.60062
		159.09	2.79	4.96845
		166.26	5.59	45.6516
		175.62	6.6	24.9133
		187.35	6.6	6.0627
		199.26	6.6	1.82341
		207.21	6.6	0.331964
		217	6.6	1.94195e-10
Healthy	SLX-12534.D707-D503	80.51	1	0.0374238
		91.46	1	0.117505
		101.49	1.9	0.223928
		111.07	1.9	0.357938
		122.03	1.37	0.623551
		133.32	1.37	1.06381
		142.62	4.23	6.89569
		151.78	4.23	7.92374
		159.3	2.66	3.93796
		166.61	5.72	39.7948
		176.24	6.56	28.7028
		187.72	6.56	9.85601
		199	6.56	3.79877
		209.58	6.56	1.31583
		217	6.56	0.147233
Healthy	SLX-12534.D707-D504	80.45	1.01	0.0830149
		91.4	1.01	0.15928
		101.33	2.13	0.296839
		111.08	2.13	0.423784
		122	1.42	0.660855
		133.34	1.42	1.10197
		142.64	4.21	6.91932
		151.81	4.21	7.92353
		159.25	2.56	3.5803
		166.56	5.78	39.6856
		176.15	6.66	28.8713
		187.73	6.66	9.92468
		199.07	6.66	3.74536
		209.82	6.66	1.29762
		217	6.66	0.130955
Healthy	SLX-12534.D708-D501	80.47	1	0.0781357
		91.5	1	0.15746
		101.32	2.19	0.302276
		111.16	2.19	0.447244
		122.02	1.41	0.68044
		133.31	1.41	1.11783
		142.58	4.25	7.05071
		151.78	4.25	8.04099
		159.28	2.66	3.79211
		166.61	5.8	40.4092
		176.22	6.51	27.9423
		187.66	6.51	9.66753
		198.94	6.51	3.71815
		209.85	6.51	1.30555
		217	6.51	0.0451007
Healthy	SLX-12534.D708-D502	80.31	1.81	0.434658
		91.33	1.81	0.551204
		101.43	2.92	0.859996
		111.18	2.92	1.13898
		122	1.8	1.29521
		133.15	1.8	1.84933
		142.35	4.56	8.91764
		151.62	4.56	9.14236
		159.2	2.59	3.64406
		166.55	6.1	40.8203
		176.32	6.56	23.941
		187.58	6.56	8.22921
		199.03	6.56	2.91205
		209.77	6.56	0.971157
		217.08	6.56	3.07709e-08
Healthy	SLX-12534.D708-D503	80.27	1.82	0.429373
		91.29	1.82	0.539525
		101.48	2.96	0.858741
		111.16	2.96	1.14445
		121.99	1.8	1.28978
		133.16	1.8	1.8637
		142.35	4.58	8.89587
		151.62	4.58	9.17456
		159.23	2.71	3.91816
		166.53	5.98	39.7271
		176.25	6.56	24.5525
		187.56	6.56	8.30078
		198.96	6.56	2.9324
		209.67	6.56	1.0306
		219.05	6.56	4.08141e-09
Healthy	SLX-12534.D708-D504	80.29	1.86	0.464634
		91.32	1.86	0.559228
		101.43	2.96	0.839055
		111.18	2.96	1.09527
		122	1.76	1.22849
		133.2	1.76	1.79589
		142.36	4.62	8.82802
		151.66	4.62	9.16953
		159.25	2.69	3.92704
		166.53	5.97	39.3207
		176.22	6.7	25.2711
		187.65	6.7	8.29416
		199.13	6.7	2.93397
		209.98	6.7	0.988181
		217.5	6.7	3.8987e-08
Healthy	SLX-12534.D709-D501	80.38	1.3	0.145769
		91.31	1.3	0.268323
		101.28	2.09	0.393842
		111.19	2.09	0.572219
		122.01	1.51	0.890289
		133.33	1.51	1.38581
		142.62	4.1	7.48539
		151.93	4.1	8.02474
		159.37	2.58	3.64037
		166.64	6.11	44.9649
		176.36	6.62	24.9311
		187.93	6.62	8.10913
		199.23	6.62	2.95545
		209.82	6.62	1.01303
		219.01	6.62	1.55574e-08
Healthy	SLX-12534.D709-D503	80.26	1	0.0105986
		91.45	1	0.0673227
		101.42	1.52	0.130766
		111.12	1.52	0.233121
		122.09	1.31	0.572731
		133.35	1.31	0.984719
		142.62	4.14	6.47524
		151.85	4.14	7.7602
		159.34	2.51	3.51565
		166.55	5.61	39.9404
		176.16	6.68	29.7651
		187.7	6.68	10.0123
		199.3	6.68	3.86896
		210.03	6.68	1.46065
		217	6.68	0.10243
Healthy	SLX-12534.D709-D504	80.61	1.06	0.136381
		91.46	1.06	0.307212
		101.57	2.85	0.825709
		111.13	2.85	1.26209
		122.02	1.79	1.33994
		133.06	1.79	1.88802
		142.08	4.83	9.91759
		151.27	4.83	10.5305
		159.15	2.87	4.68101
		166.65	6.03	41.0592
		176.35	6.26	22.4888
		187.4	6.26	7.43483
		198.43	6.26	2.24752
		207.68	6.26	0.540096
		217.02	6.26	7.74566e-09
Healthy	SLX-12534.D710-D501	80.41	1	0.0510278
		91.49	1	0.110007
		101.37	1.52	0.1508
		111.07	1.52	0.230922
		122.1	1.25	0.492922
		133.41	1.25	0.891353
		142.59	4	5.81572
		151.89	4	7.24785
		159.37	2.48	3.43666
		166.63	5.76	39.3307
		176.41	6.8	29.2006
		188.06	6.8	10.9259
		199.54	6.8	4.49583
		210.1	6.8	1.91485
		220.85	6.8	0.577455
Healthy	SLX-12534.D710-D502	80.41	1	0.0373176
		91.47	1	0.106122
		101.22	1.53	0.158505
		111.16	1.53	0.239095
		122.11	1.28	0.519379
		133.43	1.28	0.919555
		142.62	4.02	5.95455
		151.87	4.02	7.32922
		159.37	2.48	3.462
		166.64	5.8	39.981
		176.48	6.77	28.7853
		188.09	6.77	10.7271
		199.67	6.77	4.33604
		210.22	6.77	1.79898
		220.9	6.77	0.508145
Healthy	SLX-12534.D710-D503	80.58	1	0.0189744
		91.41	1	0.0991652
		101.44	1.76	0.183088
		111.2	1.76	0.345335
		122.08	1.51	0.739408
		133.32	1.51	1.23435
		142.57	4.2	6.69005
		151.9	4.2	7.49055
		159.3	2.58	3.33167
		166.61	5.92	38.9067
		176.4	6.69	28.7066
		187.82	6.69	10.9901
		199.08	6.69	4.2815
		210	6.69	1.55486
		219.35	6.69	0.309868
Healthy	SLX-12534.D710-D504	80.44	1	0.0126838
		91.42	1	0.0845827
		101.4	1.6	0.159176
		111.21	1.6	0.30241
		122.06	1.5	0.697165
		133.34	1.5	1.19418
		142.61	4.21	6.5937
		151.88	4.21	7.37808
		159.3	2.66	3.46321
		166.61	5.84	38.5907
		176.41	6.65	28.8484
		187.8	6.65	11.1968
		199.11	6.65	4.34455
		209.73	6.65	1.6203
		219.46	6.65	0.371968
Healthy	SLX-12534.D711-D505	80.43	1.31	0.16159
		91.37	1.31	0.256233
		101.5	2.57	0.512517
		111.17	2.57	0.768795
		121.98	1.71	1.03999
		133.18	1.71	1.61468
		142.38	4.58	8.47647
		151.64	4.58	8.98984
		159.21	2.75	4.00671
		166.54	5.97	39.8756
		176.2	6.71	26.1062
		187.62	6.71	8.81395
		199.11	6.71	3.04894
		209.79	6.71	1.08554
		219.11	6.71	4.6296e-10
Healthy	SLX-12534.D711-D506	80.42	1.31	0.160467
		91.39	1.31	0.257404
		101.5	2.54	0.512784
		111.23	2.54	0.77571
		122.04	1.71	1.05303
		133.19	1.71	1.61753
		142.41	4.57	8.51984
		151.66	4.57	9.05175
		159.2	2.63	3.76073
		166.53	6.03	40.6677
		176.26	6.66	25.5817
		187.63	6.66	8.722
		199.16	6.66	3.06441
		209.94	6.66	1.01852
		219.95	6.66	2.05086e-08
Healthy	SLX-12534.D711-D507	81.33	6.4	4.67444e-11
		92.47	6.4	8.13793e-12
		101.38	1	0.0494743
		111.26	1	0.10302
		121.99	1.16	0.313728
		133.37	1.16	0.629071
		142.66	4.07	5.05827
		151.71	4.07	6.31985
		159.29	2.67	3.39773
		166.66	5.96	38.7501
		176.33	6.9	30.9691
		187.92	6.9	11.9898
		199.28	6.9	5.05506
		209.79	6.9	2.01462
		219.52	6.9	0.517898
Healthy	SLX-12534.D711-D508	78.12	3.34	5.505e-11
		91.07	3.34	3.72369e-13
		101.3	1	0.0408983
		111.25	1	0.0965259
		122	1.15	0.29769
		133.38	1.15	0.616691
		142.65	4.06	4.99368
		151.75	4.06	6.40031
		159.28	2.6	3.4507
		166.63	5.82	37.733
		176.25	6.93	31.6887
		187.83	6.93	12.0753
		199.21	6.93	5.19634
		209.75	6.93	2.04015
		219.46	6.93	0.548434
Healthy	SLX-12534.D712-D505	80.5	1	0.0907716
		91.39	1	0.15554
		101.39	2.04	0.314281
		110.96	2.04	0.376638
		121.92	1.38	0.514305
		133.2	1.38	0.987624
		142.4	4.41	7.62009
		151.68	4.41	9.042
		159.05	2.71	4.5616
		166.3	5.72	47.0778
		175.75	6.6	25.033
		187.48	6.6	6.52157
		199.19	6.6	2.06461
		207.63	6.6	0.481874
		217	6.6	8.30891e-13
Healthy	SLX-12534.D712-D506	80.46	1	0.101241
		91.39	1	0.162448
		101.36	2.1	0.331079
		110.98	2.1	0.396101
		121.95	1.41	0.534365
		133.17	1.41	1.0256
		142.43	4.39	7.63559
		151.72	4.39	9.05825
		159.07	2.7	4.69466
		166.31	5.68	46.8367
		175.75	6.58	24.9838
		187.41	6.58	6.48462
		199.23	6.58	2.07951
		207.88	6.58	0.476813
		220.47	6.58	1.50401e-10
Healthy	SLX-12534.D712-D507	80.45	1	0.0147552
		91.46	1	0.0758729
		101.45	1.68	0.158158
		111.03	1.68	0.276098
		121.98	1.34	0.4469
		133.23	1.34	0.784215
		142.42	4.29	5.7069
		151.54	4.29	6.99537
		159.24	2.69	3.63478
		166.67	6.03	39.0791
		176.33	6.91	29.7624
		187.84	6.91	11.3402
		199.26	6.91	4.54938
		209.68	6.91	1.79654
		219.7	6.91	0.446825
Healthy	SLX-12534.D712-D508	80.4	1	0.032866
		91.46	1	0.0988187
		101.46	1.8	0.198321
		111.07	1.8	0.309818
		121.95	1.36	0.482755
		133.2	1.36	0.820352
		142.42	4.31	5.8399
		151.59	4.31	7.17821
		159.23	2.56	3.40125
		166.65	6.04	39.2413
		176.33	6.92	29.4794
		187.81	6.92	11.2585
		199.34	6.92	4.56807
		210.15	6.92	1.72914
		219.69	6.92	0.384668
Healthy	SLX-13222.D701-D501	80.11	1	2.39497e-12
		91.17	1	9.31699e-13
		101.08	1	5.2891e-13
		111.15	1	0.0147191
		122.09	1	0.17598
		133.4	1	0.396499
		142.93	4.06	4.62243
		151.63	4.06	6.03069
		159.12	2.86	3.8842
		166.65	5.57	38.3738
		175.93	6.58	33.4855
		187.21	6.58	11.6077
		198.71	6.58	4.58144
		209.11	6.58	1.71193
		217.64	6.58	0.309335
Healthy	SLX-13222.D701-D502	80.33	1	0.0121547
		91.36	1	0.0530211
		101.36	1.11	0.0632901
		111.29	1.11	0.113877
		121.84	1.11	0.315062
		133.35	1.11	0.518129
		142.88	4.35	5.45199
		151.53	4.35	6.69614
		158.94	2.81	3.72005
		166.58	5.77	40.122
		175.94	6.46	31.454
		187.21	6.46	10.796
		198.64	6.46	3.95463
		208.8	6.46	1.47268
		217	6.46	0.165845
Healthy	SLX-13222.D701-D503	80.37	1	0.0328428
		91.36	1	0.0630052
		101.34	1.33	0.0802098
		111.27	1.33	0.151384
		122.02	1.19	0.354428
		133.4	1.19	0.617684
		142.9	4.19	5.51668
		151.72	4.19	6.69987
		159.08	2.78	3.86526
		166.62	5.58	39.8674
		175.94	6.44	31.8007
		187.17	6.44	10.4063
		198.6	6.44	3.87748
		209.05	6.44	1.40473
		217	6.44	0.0630207
Healthy	SLX-13222.D701-D504	80.47	1	0.0490452
		91.4	1	0.0965088
		101.26	1.57	0.130506
		111.23	1.57	0.196703
		121.83	1.24	0.415885
		133.35	1.24	0.649302
		142.85	4.33	5.85758
		151.61	4.33	6.99705
		158.95	2.66	3.56854
		166.55	5.76	40.5007
		175.92	6.55	31.2655
		187.28	6.55	10.1535
		198.73	6.55	3.67363
		209.37	6.55	1.30674
		217	6.55	0.0117844
Healthy	SLX-13222.D702-D501	80.42	1	0.0746441
		91.39	1	0.120753
		101.27	1.5	0.15883
		111.07	1.5	0.210915
		121.93	1.25	0.477556
		133.36	1.25	0.944907
		142.6	4.19	7.06203
		151.69	4.19	7.81816
		159.16	2.7	3.94448
		166.59	5.97	42.0134
		176.26	6.58	27.19
		187.68	6.58	9.80463
		199.16	6.58	3.66147
		209.97	6.58	1.26583
		217.47	6.58	0.108543
Healthy	SLX-13222.D702-D502	80.27	1.35	0.152115
		91.29	1.35	0.208705
		101.16	1.8	0.250485
		111.08	1.8	0.314986
		121.99	1.34	0.585388
		133.31	1.34	1.11515
		142.59	4.21	7.6027
		151.7	4.21	8.10305
		159.16	2.77	4.15161
		166.56	5.93	41.9069
		176.21	6.59	26.7324
		187.61	6.59	9.21748
		199.1	6.59	3.2996
		209.79	6.59	1.15156
		220.3	6.59	7.80684e-10
Healthy	SLX-13222.D702-D503	80.32	1.12	0.102021
		91.34	1.12	0.156084
		101.06	1.63	0.195046
		111.09	1.63	0.255353
		121.98	1.3	0.535452
		133.3	1.3	1.01441
		142.54	4.15	7.26652
		151.63	4.15	7.88607
		159.1	2.75	3.97168
		166.55	6.01	42.3441
		176.18	6.64	27.0535
		187.59	6.64	9.5119
		199.16	6.64	3.42555
		209.93	6.64	1.16114
		218.39	6.64	6.15397e-09
Healthy	SLX-13222.D702-D504	80.17	1.61	0.238734
		91.23	1.61	0.272609
		101.18	1.94	0.289795
		111.08	1.94	0.357105
		122	1.37	0.61839
		133.35	1.37	1.16447
		142.59	4.19	7.60056
		151.77	4.19	8.1511
		159.17	2.66	3.98788
		166.56	5.91	42.0691
		176.2	6.64	26.8465
		187.64	6.64	8.95023
		199.2	6.64	3.23763
		209.88	6.64	1.02875
		217.01	6.64	1.42614e-09
Healthy	SLX-13222.D703-D501	80.32	1	0.0570857
		91.33	1	0.107917
		101.19	1.35	0.129697
		111.12	1.35	0.187993
		121.96	1.26	0.469694
		133.32	1.26	0.924788
		142.61	4.2	7.05265
		151.71	4.2	7.85972
		159.15	2.77	4.01039
		166.57	5.95	41.7462
		176.24	6.64	27.5433
		187.66	6.64	9.73577
		199.05	6.64	3.70992
		209.7	6.64	1.22503
		217.23	6.64	0.141254
Healthy	SLX-13222.D703-D502	80.42	1	0.0290667
		91.36	1	0.0698578
		101.26	1.12	0.0811612
		111.13	1.12	0.12821
		121.92	1.2	0.40742
		133.35	1.2	0.861552
		142.63	4.2	6.91972
		151.68	4.2	7.79967
		159.1	2.73	3.96704
		166.56	5.94	42.1406
		176.19	6.61	27.8626
		187.57	6.61	9.7767
		199.03	6.61	3.60725
		209.71	6.61	1.20923
		217	6.61	0.0892231
Healthy	SLX-13222.D703-D503	80.54	1.19	0.145121
		91.44	1.19	0.300671
		101.46	2.73	0.65013
		111.13	2.73	0.973892
		122.06	1.69	1.1448
		133.22	1.69	1.68657
		142.33	4.52	8.6925
		151.57	4.52	9.07556
		159.28	2.74	3.99142
		166.6	5.95	39.7217
		176.35	6.55	24.5829
		187.72	6.55	8.85134
		199.02	6.55	3.32277
		209.44	6.55	1.2202
		218.43	6.55	0.24689
Healthy	SLX-13222.D703-D504	80.34	1.74	0.365901
		91.34	1.74	0.4797
		101.51	2.87	0.773905
		111.2	2.87	1.0481
		122.01	1.77	1.20729
		133.15	1.77	1.7549
		142.36	4.61	8.62135
		151.63	4.61	9.10545
		159.22	2.71	3.87102
		166.52	5.95	39.034
		176.2	6.73	25.6936
		187.63	6.73	8.56438
		199.17	6.73	3.04084
		209.81	6.73	1.03061
		217	6.73	0.0945365
Healthy	SLX-13222.D704-D505	80.2	1	0.0377357
		91.26	1	0.0279491
		101.52	1	0.0164073
		111.14	1	0.0449154
		122.16	1.05	0.199623
		133.48	1.05	0.591286
		142.89	3.89	4.76895
		151.97	3.89	6.2182
		159.24	2.6	3.33285
		166.69	5.92	42.1114
		176.19	6.72	31.3228
		187.45	6.72	10.9508
		198.97	6.72	4.06971
		209.87	6.72	1.44644
		217	6.72	0.0235494
Healthy	SLX-13222.D704-D506	80.22	1	0.0256806
		91.26	1	0.0141363
		102.52	6.01	2.80664e-13
		109.28	6.01	3.41136e-10
		122.18	1.03	0.182817
		133.47	1.03	0.556388
		142.91	3.96	4.77746
		152.03	3.96	6.21888
		159.25	2.66	3.50426
		166.66	5.82	41.2939
		176.16	6.69	31.786
		187.51	6.69	11.1383
		199.01	6.69	4.08271
		209.82	6.69	1.48169
		217	6.69	0.0735853
Healthy	SLX-13222.D704-D507	80.11	1	0.0118303
		91.19	1	0.00313334
		101.95	4.59	2.50266e-12
		110.56	4.59	7.48068e-13
		122.09	1	0.169156
		133.46	1	0.546226
		142.92	3.86	4.62725
		151.94	3.86	6.07535
		159.27	2.8	3.62337
		166.69	5.91	41.5455
		176.16	6.72	31.806
		187.42	6.72	11.1004
		198.81	6.72	4.20128
		209.74	6.72	1.49598
		217	6.72	0.0441251
Healthy	SLX-13222.D704-D508	79.15	7.5	1.45904e-09
		89.21	7.5	3.193e-13
		101.48	1.93	0.219959
		111.1	1.93	0.383856
		122.06	1.41	0.602238
		133.28	1.41	1.03357
		142.48	4.43	6.95955
		151.68	4.43	8.22949
		159.29	2.66	3.86074
		166.64	5.82	40.2461
		176.29	6.58	27.9737
		187.62	6.58	9.9317
		199.02	6.58	3.72176
		209.48	6.58	1.3383
		218.05	6.58	0.227852
Healthy	SLX-13222.D705-D505	80.53	1	0.0063792
		91.49	1	0.0903322
		101.58	1.85	0.200682
		111.08	1.85	0.370826
		122.02	1.43	0.61705
		133.25	1.43	1.05276
		142.44	4.41	6.96262
		151.6	4.41	8.13903
		159.24	2.71	3.9816
		166.63	5.83	40.3018
		176.29	6.62	28.0777
		187.69	6.62	9.88266
		199.15	6.62	3.64881
		209.73	6.62	1.30166
		218.43	6.62	0.185641
Healthy	SLX-13222.D705-D506	80.21	1.49	0.186094
		91.29	1.49	0.244517
		101.52	2.56	0.450802
		111.08	2.56	0.580118
		121.95	1.54	0.68463
		133.2	1.54	1.27033
		142.46	4.53	8.69012
		151.77	4.53	9.96453
		159.03	2.79	4.93533
		166.26	5.61	46.9395
		175.55	6.48	23.8523
		187.29	6.48	5.27376
		199.37	6.48	1.50401
		207	6.48	0.12446
		219.34	6.48	1.01658e-10
Healthy	SLX-13222.D705-D507	80.13	4.06	3.46168e-12
		91.12	4.06	1.04472e-12
		100.75	6.05	1.58559e-10
		111.27	6.05	3.87068e-12
		122.19	1	0.190724
		133.5	1	0.565874
		142.91	3.93	4.79686
		151.98	3.93	6.26011
		159.26	2.63	3.40538
		166.66	5.85	41.0681
		176.15	6.78	32.1913
		187.5	6.78	11.1265
		199.11	6.78	4.085
		209.88	6.78	1.4799
		217	6.78	0.0478653
Healthy	SLX-13222.D705-D508	80.26	1.39	0.165295
		91.27	1.39	0.200259
		101.48	2.35	0.367402
		111.08	2.35	0.474642
		121.95	1.52	0.631823
		133.21	1.52	1.22527
		142.48	4.48	8.44109
		151.78	4.48	9.74303
		159.01	2.77	4.89755
		166.24	5.61	47.0763
		175.6	6.57	24.4249
		187.46	6.57	5.35425
		199.61	6.57	1.56936
		207	6.57	0.161936
		217	6.57	1.32307e-10
Healthy	SLX-13222.D706-D505	80.31	1.23	0.0793196
		90.93	1.23	0.0710465
		101.42	1.01	0.0422486
		111.21	1.01	0.0679335
		121.88	1	0.143604
		133.43	1	0.281012
		143.01	3.74	3.06029
		151.89	3.74	4.38994
		159.32	2.86	3.52573
		166.81	5.38	31.5273
		176.32	6.58	35.087
		187.68	6.58	16.0676
		198.84	6.58	7.07661
		209.23	6.58	2.81761
		219.46	6.58	0.801687
Healthy	SLX-13222.D706-D506	80.39	1.46	0.259392
		91.31	1.46	0.351884
		101.46	3.06	0.75863
		111.26	3.06	1.09891
		122.01	1.79	1.19061
		133.23	1.79	1.77377
		142.46	4.68	9.60826
		151.64	4.68	9.92875
		159.03	2.79	4.38399
		166.21	5.44	41.8763
		175.48	6.61	24.979
		187.33	6.61	5.92544
		199.01	6.61	1.86978
		207.63	6.61	0.533561
		219.46	6.61	1.83409e-13
Healthy	SLX-13222.D706-D507	80.32	1.67	0.308861
		91.34	1.67	0.457961
		101.36	2.87	0.748576
		111.31	2.87	1.02365
		121.97	1.76	1.23794
		133.25	1.76	1.88069
		142.47	4.46	9.3552
		151.72	4.46	9.24664
		159.11	2.69	4.12103
		166.36	5.62	41.7541
		175.93	6.59	24.733
		187.64	6.59	6.80133
		199.34	6.59	2.2733
		209.01	6.59	0.639646
		220.63	6.59	1.90037e-10
Healthy	SLX-13222.D706-D508	80.37	1.6	0.236274
		91.27	1.6	0.336733
		101.31	2.61	0.548583
		111.22	2.61	0.741751
		121.93	1.6	0.92314
		133.22	1.6	1.41875
		142.43	4.69	9.93662
		151.59	4.69	10.115
		158.78	2.66	4.56832
		166.1	5.28	46.6881
		175.19	6.43	23.6686
		187.29	6.43	4.30518
		199.54	6.43	1.0989
		207	6.43	9.89875e-13
		217	6.43	1.22742e-09
Other	SLX-11870.D707-D505	80.5	1.11	0.045957
		91.44	1.11	0.128294
		101.49	2.1	0.237248
		111.25	2.1	0.352086
		122.06	1.61	0.642505
		133.3	1.61	1.16794
		142.75	4.49	6.54909
		151.88	4.49	7.54384
		159.31	2.54	3.08875
		166.57	5.79	36.3021
		176.1	6.72	29.9423
		187.67	6.72	11.0132
		199.11	6.72	4.82018
		209.77	6.72	1.99953
		221	6.72	0.80064
Pancreatic	SLX-12832.D711-D508	79.24	4.77	0.651683
		91.61	4.77	0.616844
		101.82	4.02	0.684115
		111.14	4.02	0.950605
		122.07	1.78	0.96102
		133.21	1.78	1.7006
		141.81	5.88	14.0264
		151.52	5.88	17.6772
		158.51	3.19	8.55158
		165.3	4.32	43.3516
		174	6.32	13.237
		188.26	6.32	1.08638
		200.42	6.32	0.523819
		207.2	6.32	0.328689
		220.98	6.32	2.16693e-12
Pancreatic	SLX-12832.D712-D505	80.23	1.07	0.048663
		91.26	1.07	0.0489408
		101.56	1.25	0.0545499
		111.01	1.25	0.111772
		122.01	1.47	0.491244
		133.3	1.47	1.18803
[truncated: 579 more rows]
